# Supplementary material for: Whole genome duplication drove cell type evolution in the vertebrate brain
Source: Research Square preprint supplement (doi:10.21203/rs.3.rs-6965966/v1), 2025-07-04
Supplement: Supplementary file 2 [file 09edec01fca9393047637fca.xlsx]

## Sheet: Sheet1
Table S6. Experimentally identified markers for excitatory CN neurons by Kebschull, et al (2020, Science) and additional information
Excitatory CN neurons	Ohnologues (my version)	Ohnologues v2 (intermediate threshold)	Please go to Kebschull's paper (Figs. 3; S16-19) for more details
Slc17a6	TRUE	TRUE
Trpm3	TRUE	TRUE
Sorcs3	TRUE	FALSE
Acan	FALSE	FALSE
Sv2c	TRUE	TRUE
Ankfn1	FALSE	FALSE
Fign	TRUE	TRUE
Cd24a	FALSE	FALSE
Cpne4	FALSE	TRUE
Stac2	TRUE	TRUE
Man1a	FALSE	TRUE
Nxph1	FALSE	FALSE
1810041L15Rik	FALSE	FALSE
Pcdh11x	FALSE	TRUE
Penk	FALSE	FALSE
Zfp804b	TRUE	FALSE
Calb2	TRUE	TRUE
Asic2	TRUE	TRUE
Cacna1e	TRUE	TRUE
Spp1	FALSE	FALSE
