# Supplementary material for: Whole genome duplication drove cell type evolution in the vertebrate brain
Source: Research Square preprint supplement (doi:10.21203/rs.3.rs-6965966/v1), 2025-07-04
Supplement: Supplementary file 3 [file 31d909fdb4fbf83573b3e4cb.xlsx]

## Sheet: S1 Marker references
Table S1. Marker genes and literature references for annotation confirmation and refining. The species conservation is based on expression pattern of these markers in four vertebrate brain atlases.
Species conservation	Symbol	Cell type	Gene type	Gene ID in P. mar.	Notes	Citations	PMID	Title
Vertebrate conserved	AQP4	Astrocytes	effector	MSTRG.3484	Lamprey AQP4 is not highly expressed in AST but lamprey AQP1 (MSTRG.10628) is highly expressed. AQP1-6 are from the same family. Human and lizard AQP1 is also expressed in AST.	Szu, 2016	26941623	The Role of Astrocytic Aquaporin-4 in Synaptic Plasticity and Learning and Memory
Vertebrate conserved	GFAP	Astrocytes	effector	MSTRG.6189/MSTRG.17906	Two GFAP copies in lamprey and are highly expressed in AST and ependymal cells.	C Yanes, et al, 1990	2358521	Radial glia and astrocytes in developing and adult telencephalon of the lizard Gallotia galloti as revealed by immunohistochemistry with anti-GFAP and anti-vimentin antibodies
Vertebrate conserved	GJA1	Astrocytes	effector	MSTRG.3188	Several copies in this family for all species, only one copy in lamprey is highly expressed in AST and ependyaml cells.	Ceglia, et al, 2023	37674083	Specialized astrocytes mediate glutamatergic gliotransmission in the CNS
Vertebrate conserved	MLC1	Astrocytes	effector	MSTRG.4047		Morales, et al, 2022	34965971	Mlc1-Expressing Perivascular Astrocytes Promote Blood-Brain Barrier Integrity
Vertebrate conserved	SLC1A2	Astrocytes	effector	MSTRG.939	Other copies in lamprey not expressed in AST	Rothstein, et al, 1996	8785064	Knockout of glutamate transporters reveals a major role for astroglial transport in excitotoxicity and clearance of glutamate
Vertebrate conserved	SLC1A3	Astrocytes	effector	MSTRG.20425	Other copies in lamprey not expressed in AST	Rothstein, et al, 1996	8785064	Knockout of glutamate transporters reveals a major role for astroglial transport in excitotoxicity and clearance of glutamate
Vertebrate conserved	SLC4A4	Astrocytes	effector	MSTRG.12777/MSTRG.4816		Ye, et al, 2024	38709635	Astrocytic Slc4a4 regulates blood-brain barrier integrity in healthy and stroke brains via a CCL2-CCR2 pathway and NO dysregulation
Vertebrate conserved	SLC6A1 and SLC6A11	Astrocytes	effector	MSTRG.4105/MSTRG.7589	Several copies in this family for all species, only two copies in lamprey highly expressed in AST.	Patton, et al, 2023	37186824	Astrocytic control of extracellular GABA drives circadian timekeeping in the suprachiasmatic nucleus
Vertebrate conserved	SPARC	Astrocytes	effector	MSTRG.12787		Mendis, et al, 1995	7796180	SPARC, an extracellular matrix glycoprotein containing the follistatin module, is expressed by astrocytes in synaptic enriched regions of the adult brain
Vertebrate conserved	SOX8/9/10 (SOXE3)	Astrocytes	TF	MSTRG.1257	The other two copies for Sox8/9/10 family in lamprey: MSTRG.6852 (SOXE1); MSTRG.4669 (SOXE2).	Lamanna, et al, 2023	37710042	A lamprey neural cell type atlas illuminates the origins of the vertebrate brain
Amniote conserved	GDF10	Bergmann glia (Astrocytes)	effector	MSTRG.12794/MSTRG.4830		Zeisel, et al, 2018	30096314	Molecular Architecture of the Mouse Nervous System
Vertebrate conserved	SPARC	Ependymal cells	effector	MSTRG.12787		Alkabie, et al, 2016	27581191	SPARC expression by cerebral microvascular endothelial cells in vitro and its influence on blood-brain barrier properties
Amniote conserved	MLC1	Ependymal cells	effector	MSTRG.4047		Ambrosini, et al, 2008	18165104	Biochemical characterization of MLC1 protein in astrocytes and its association with the dystrophin-glycoprotein complex
Vertebrate conserved	CLIC6	Choroid plexus epithelial cells	effector	MSTRG.19890		Giffon, et al, 2003	14499480	CLIC6, a member of the intracellular chloride channel family, interacts with dopamine D(2)-like receptors
Vertebrate conserved	SLC13A4	Choroid plexus epithelial cells	effector	MSTRG.5492		Andreassen, et al, 2022	35659263	Transcriptional profiling of transport mechanisms and regulatory pathways in rat choroid plexus
Vertebrate conserved	PDGFRA	Fibroblasts	effector	MSTRG.8489		Vanlandewijck, et al, 2018	29443965	A molecular atlas of cell types and zonation in the brain vasculature
Vertebrate conserved	FOXC1	Fibroblasts	TF	MSTRG.12974		Zeisel, et al, 2018	30096314	Molecular Architecture of the Mouse Nervous System
Vertebrate conserved	CSF1R	Microglia	effector	MSTRG.7252		Lamanna, et al, 2023	37710042	A lamprey neural cell type atlas illuminates the origins of the vertebrate brain
Vertebrate conserved	EPAS1	Vascular cells	TF	MSTRG.9221		Maemura, et al, 1999	10531360	Generation of a Dominant-negative Mutant of Endothelial PAS Domain Protein 1 by Deletion of a Potent C-terminal Transactivation Domain
Amniote conserved	PDGFRA	Oligodendrocyte precursor cells	effector	MSTRG.8489		L Claesson-Welsh, et al, 1989	2536372	Identification and structural analysis of the A type receptor for platelet-derived growth factor. Similarities with the B type receptor
Amniote conserved	SOX8 and SOX10	Oligodendrocyte precursor cells	TF	MSTRG.1257/MSTRG.4669/MSTRG.6852	Three copies in lamprey expressed in astrcoytes. With considering AST and Oligodendrocytes share developmental path, it suggest the origin of oligodendrocytes from astrocytes.	Stolt, et al, 2004	15102707	Transcription factors Sox8 and Sox10 perform non-equivalent roles during oligodendrocyte development despite functional redundancy
Amniote conserved	MAG	Oligodendrocytes	effector	NA		Quales, 2007	17241126	Myelin-associated glycoprotein (MAG): past, present and beyond
Amniote conserved	MBP	Oligodendrocytes	effector	MSTRG.7039		Galiano, et al, 2006	16773649	Myelin basic protein functions as a microtubule stabilizing protein in differentiated oligodendrocytes
Amniote conserved	MOG	Oligodendrocytes	effector	NA		Vourc'h, et al, 2003	12935913	The oligodendrocyte-myelin glycoprotein gene is highly expressed during the late stages of myelination in the rat central nervous system
Amniote conserved	OLIG2	Oligodendrocytes	TF	PMZ_0031563/PMZ_0032541	Oligo3 in this family but not marker.	Zhou, et al, 2001	11567617	The bHLH transcription factor Olig2 promotes oligodendrocyte differentiation in collaboration with Nkx2.2
Amniote conserved	SOX8 and SOX10	Oligodendrocytes	TF	MSTRG.1257/MSTRG.4669/MSTRG.6852	Three copies in lamprey expressed in astrcoytes. With considering AST and Oligodendrocytes share developmental path, it suggest the origin of oligodendrocytes from astrocytes.	Stolt, et al, 2004	15102707	Transcription factors Sox8 and Sox10 perform non-equivalent roles during oligodendrocyte development despite functional redundancy
Vertebrate conserved	ALAS1 and ALAS2	Erythrocytes	effector	MSTRG.8862	Only lamprey has a cluster of erythrocytes, confirmed with GO enrichment and markers.	Lamanna, et al, 2023	37710042	A lamprey neural cell type atlas illuminates the origins of the vertebrate brain
Lamprey specific	LHX2 and LHX9	Telencephalon glutamatergic neurons	TF	MSTRG.10469	Lhx2 has some expression in TeExc for jawed vertebrates but not much	Villar-Cerviño, et al, 2011	21452205	Glutamatergic neuronal populations in the forebrain of the sea lamprey, Petromyzon marinus: an in situ hybridization and immunocytochemical study.
Vertebrate conserved	NEUROD1/2/4/6	Telencephalon glutamatergic neurons	TF	MSTRG.5979/MSTRG.1633		Tutukova, et al, 2021	34177462	The Role of Neurod Genes in Brain Development, Function, and Disease
Vertebrate conserved	SLC17A7	Telencephalon glutamatergic neurons	effector	MSTRG.857		Siletti, et al, 2023; Villar-Cerviño, et al, 2011	37824663;21452205	Transcriptomic diversity of cell types across the adult human brain;Glutamatergic neuronal populations in the forebrain of the sea lamprey, Petromyzon marinus: an in situ hybridization and immunocytochemical study.
Vertebrate conserved	TBR1	Telencephalon glutamatergic neurons	TF	MSTRG.6042	Three copies in lamprey, two of them expressed in Telencephalon. More specifically, Tbr1 is marker for Olfactory bulb and deep cortical layer.	Villar-Cerviño, et al, 2011	21452205	Glutamatergic neuronal populations in the forebrain of the sea lamprey, Petromyzon marinus: an in situ hybridization and immunocytochemical study.
Vertebrate conserved	FOXG1	Telencephalon neurons (MGE/LGE interneurons and some excitatory neurons)	TF	MSTRG.10939		Kumamoto, et al, 2017	28581027	Evolutionary conservation and conversion of Foxg1 function in brain development
Vertebrate conserved	PAX6	Telencephalon GABAergic neurons	TF	MSTRG.5511	Though it's highly expressed than other cell types, but overal pct. is low	Cao, et al, 2019	31292549	Comprehensive single-cell transcriptome lineages of a proto-vertebrate.
Vertebrate conserved	LHX6 and LHX8	Telencephalon GABAergic neurons	TF	MSTRG.10404	Another copy in lamprey (MSTRG.23466) is not marker.	Lamanna, et al, 2023	37710042	A lamprey neural cell type atlas illuminates the origins of the vertebrate brain
Amniote conserved	CCK	Telencephalon GABAergic neurons (CGE)	effector	MSTRG.2032/MSTRG.6070		Leung, et al, 2022	35546872	Genetic regulation of vertebrate forebrain development by homeobox genes.
Amniote conserved	DLX1	Telencephalon GABAergic neurons (CGE)	TF	MSTRG.6109/MSTRG.2263		Martínez-de-la-Torre, et al, 2011	21185911	Distal-less-like protein distribution in the larval lamprey forebrain
Amniote conserved	PROX1	Telencephalon GABAergic neurons (CGE)	TF	MSTRG.20120/MSTRG.17410		Leung, et al, 2022	35546872	Genetic regulation of vertebrate forebrain development by homeobox genes.
Vertebrate conserved	MEIS2	Telencephalon GABAergic neurons (LGE)	TF	MSTRG.16491	Lamprey have two other copies MSTRG.17403/MSTRG.17402, but not as highly expressed as MSTRG.16491 in LGE	Bachy, et al, 2002	12204256	Defining pallial and subpallial divisions in the developing Xenopus forebrain
Amniote conserved	DRD1	Telencephalon GABAergic neurons (LGE)	effector	PMZ_0007579	Not expressed in lamprey	Bachy, et al, 2002	12204256	Defining pallial and subpallial divisions in the developing Xenopus forebrain
Vertebrate conserved	DRD2	Telencephalon GABAergic neurons (LGE)	effector	MSTRG.9581		Bachy, et al, 2002	12204256	Defining pallial and subpallial divisions in the developing Xenopus forebrain
Vertebrate conserved	SST	Telencephalon GABAergic neurons (MGE)	effector	MSTRG.13621	Another copy (MSTRG.23085) in lamprey but not expressed in MGE.	Tosches, et al, 2018	29724907	Evolution of pallium, hippocampus, and cortical cell types revealed by single-cell transcriptomics in reptiles
Amniote conserved	RELN	Telencephalon GABAergic neurons (MGE)	effector	MSTRG.22511/MSTRG.4026		Tosches, et al, 2018	29724907	Evolution of pallium, hippocampus, and cortical cell types revealed by single-cell transcriptomics in reptiles
Amniote conserved	CNR1	Telencephalon GABAergic neurons (MGE)	effector	PMZ_0009405/PMZ_0038708		Tosches, et al, 2018	29724907	Evolution of pallium, hippocampus, and cortical cell types revealed by single-cell transcriptomics in reptiles
Amniote conserved	ETV1	Telencephalon GABAergic neurons (MGE)	TF	MSTRG.1648/MSTRG.2258/MSTRG.24021/MSTRG.6105		Tosches, et al, 2018	29724907	Evolution of pallium, hippocampus, and cortical cell types revealed by single-cell transcriptomics in reptiles
Vertebrate conserved	GAD1 and GAD2	GABAergic neurons	effector	MSTRG.10634		Martínez-de-la-Torre, et al, 2011	21185911	Distal-less-like protein distribution in the larval lamprey forebrain
Vertebrate conserved	SLC32A1	GABAergic neurons	effector	MSTRG.11808/MSTRG.4456	Two copies in lamprey, having some difference in expression domain	Tosches, et al, 2018	29724907	Evolution of pallium, hippocampus, and cortical cell types revealed by single-cell transcriptomics in reptiles
Vertebrate conserved	SLC17A6	De/Me/Re glutamatergic neurons	effector	MSTRG.857		Siletti, et al, 2023	37824663	Transcriptomic diversity of cell types across the adult human brain
Vertebrate conserved	LHX2 and LHX9	Diencephalon glutamatergic neurons	TF	MSTRG.10469		Peukert, et al, 2011	22180728	Lhx2 and Lhx9 Determine Neuronal Differentiation and Compartition in the Caudal Forebrain by Regulating Wnt Signaling
Vertebrate conserved	LHX9	Habenular neurons (Diencephalon glutamatergic neurons)	TF	MSTRG.10469		Nagalski, et al, 2016	25963709	Molecular anatomy of the thalamic complex and the underlying transcription factors.
Vertebrate conserved	TCF7L2	Habenular neurons (Diencephalon glutamatergic neurons)	TF	MSTRG.4866/MSTRG.18671	only two lamprey copies in this family and both highly expressed in DeExc	Nagalski, et al, 2016	25963709	Molecular anatomy of the thalamic complex and the underlying transcription factors. Nagalski et al., 2015
Vertebrate conserved	ISL1	Diencephalon GABAergic neurons	TF	MSTRG.9785/MSTRG.17235	Though two copies are expressed in lamprey DeInh, MSTRG.9785 is more highly expressed.	Yao, et al, 2023	38092916	A high-resolution transcriptomic and spatial atlas of cell types in the whole mouse brain
Vertebrate conserved	DLX1, DLX2, DLX5, and DLX6	Diencephalon GABAergic neurons	TF	MSTRG.6108/MSTRG.6109/MSTRG.2263		Martínez-de-la-Torre, et al, 2011	21185911	Distal-less-like protein distribution in the larval lamprey forebrain
Vertebrate conserved	LHX2 and LHX9	Mesencephalon glutamatergic neurons	TF	MSTRG.10469		Rétaux, et al, 1999	9880598	Lhx9: a novel LIM-homeodomain gene expressed in the developing forebrain
Vertebrate conserved	POU4F1 and POU4F2	Mesencephalon glutamatergic neurons	TF	MSTRG.8547	Human only express POU4F1 as marker of Mesencephalon glutamatergic neurons	Kala, et al, 2009	19088086	The role of Tal2 and Tal1 in the differentiation of midbrain GABAergic neuron precursors
Vertebrate conserved	OTX2	Mesencephalon GABAergic neurons	TF	MSTRG.8275		Kala, et al, 2009	19088086	Gata2 is a tissue-specific post-mitotic selector gene for midbrain GABAergic neurons. The role of Tal2 and Tal1 in the differentiation of midbrain GABAergic neuron precursors
Vertebrate conserved	TAL1	Mesencephalon GABAergic neurons	TF	MSTRG.7811		Hain, et al, 2022	36048944	Molecular diversity and evolution of neuron types in the amniote brain
Vertebrate conserved	GATA2 and GATA3	Mesencephalon/Rhombencephalon GABAergic neurons	TF	MSTRG.13735/MSTRG.8761		Kala, et al, 2009	19088086	Gata2 is a tissue-specific post-mitotic selector gene for midbrain GABAergic neurons. The role of Tal2 and Tal1 in the differentiation of midbrain GABAergic neuron precursors
Vertebrate conserved	HOXB3	Rhombencephalon GABAergic neurons	TF	MSTRG.10682/PMZ_0039448/MSTRG.1877	Not highly expressed in jawed vertebrates	Lamanna, et al, 2023	37710042	A lamprey neural cell type atlas illuminates the origins of the vertebrate brain
Vertebrate conserved	NEUROD1/2/4/6	Rhombencephalon GABAergic neurons	TF	MSTRG.5979/MSTRG.1633	Alse expressed in ReExc.	Tutukova, et al, 2021	34177462	The Role of Neurod Genes in Brain Development, Function, and Disease
Vertebrate conserved	SKOR1	Rhombencephalon GABAergic neurons	effector	MSTRG.2672		Sarayloo, et al, 2020	32572201	SKOR1 has a transcriptional regulatory role on genes involved in pathways related to restless legs syndrome
Lamprey specific	SLC32A1b	Rhombencephalon GABAergic neurons	effector	MSTRG.11808	Though OTX2 expressed in lamprey MeInh and ReInh but two copies of SLC32A1 differentially expressed in MeInh and ReInh suggest they are different cell groups.	Lamanna, et al, 2023	37710042	A lamprey neural cell type atlas illuminates the origins of the vertebrate brain
Amniote conserved	NEUROD1/2/4/6	Rhombencephalon glutamatergic neurons	TF	MSTRG.5979/MSTRG.1633	Alse expressed in ReInh.	Tutukova, et al, 2021	34177462	The Role of Neurod Genes in Brain Development, Function, and Disease
