# Supplementary material for: Whole genome duplication drove cell type evolution in the vertebrate brain
Source: Research Square preprint supplement (doi:10.21203/rs.3.rs-6965966/v1), 2025-07-04
Supplement: Supplementary file 4 [file 3998a2a24e96afd98b0fc106.xlsx]

## Sheet: M. mus.
Table S7-1. Identified gain and loss of genes for the node of mice CN.
Node	Type	Gene name
13	gain	Gm37988
13	gain	Rftn2
13	gain	Efhd1
13	gain	Rgsl1
13	gain	Tor3a
13	gain	Gm20532
13	gain	Col5a1
13	gain	Nostrin
13	gain	Hck
13	gain	Gm20458
13	gain	Gata1
13	gain	Zfp275
13	gain	Arhgap4
13	gain	Btk
13	gain	Hsd17b10
13	gain	Rfxap
13	gain	Iqgap3
13	gain	Cd160
13	gain	Esrp1
13	gain	Topors
13	gain	Tfap2e
13	gain	Spocd1
13	gain	Aunip
13	gain	Myom3
13	gain	Zfp984
13	gain	Faap20
13	gain	Kcnk3
13	gain	Hvcn1
13	gain	Wdr54
13	gain	Zfp787
13	gain	Vmn2r56
13	gain	Sult2a3
13	gain	Zfp541
13	gain	Mill2
13	gain	Zfp626
13	gain	Polr2i
13	gain	Mcee
13	gain	Kdm8
13	gain	Zfp646
13	gain	Sf3b5
13	gain	Hkdc1
13	gain	Asf1b
13	gain	Abcc12
13	gain	Dhodh
13	gain	Ndst2
13	gain	Adam2
13	gain	Aph1c
13	gain	Myo5c
13	gain	Scn11a
13	gain	Gas2l1
13	gain	Gas7
13	gain	Alox8
13	gain	Doc2b
13	gain	Slc46a1
13	gain	Asb16
13	gain	Sycp2l
13	gain	Fam151b
13	gain	Naip2
13	gain	Atp6v1c2
13	gain	Card6
13	gain	Itgb7
13	gain	Amhr2
13	gain	Tekt5
13	gain	Zdhhc19
13	gain	Adamts5
13	gain	Dxo
13	gain	Myrf
13	gain	Lpxn
13	gain	Fgfbp3
13	gain	Crispld1
13	gain	Asb1
13	gain	Commd2
13	gain	Cfap99
13	gain	Chek2
13	gain	Rbm19
13	gain	Hip1r
13	gain	Lrig1
13	gain	Phlda1
13	gain	Ccdc122
13	gain	Spata48
13	gain	P2rx5
13	gain	Fbxl21
13	gain	Nagpa
13	gain	Tnfrsf12a
13	gain	Mlst8
13	gain	Meiob
13	gain	Tjap1
13	gain	Nme5
13	gain	Twnk
13	gain	Imp4
13	gain	Dusp12
13	gain	Zfp120
13	gain	Pdzk1
13	gain	Armc10
13	gain	Nr4a1
13	gain	Adgrf4
13	gain	Cxxc1
13	gain	Acsl5
13	gain	Cdk15
13	gain	Pglyrp1
13	gain	Dytn
13	gain	Map3k19
13	gain	Rgs2
13	gain	Scyl3
13	gain	Rad51
13	gain	Ncaph
13	gain	3300002I08Rik
13	gain	Gins1
13	gain	Slco4a1
13	gain	Rbmx2
13	gain	Clrn1
13	gain	Cfi
13	gain	Hyi
13	gain	Lck
13	gain	Padi3
13	gain	Padi1
13	gain	A430005L14Rik
13	gain	Triap1
13	gain	Rpusd3
13	gain	Tmem40
13	gain	Magohb
13	gain	Mansc1
13	gain	Dhx34
13	gain	Gsk3a
13	gain	Rexo5
13	gain	Zfp553
13	gain	Cnksr3
13	gain	Rps12
13	gain	Itgb2
13	gain	Gm10778
13	gain	Nt5dc3
13	gain	Has3
13	gain	Cdhr1
13	gain	Gm8104
13	gain	Tinf2
13	gain	Sorbs3
13	gain	Acsbg1
13	gain	Uaca
13	gain	Col6a4
13	gain	Cmtm7
13	gain	Tefm
13	gain	Cct6b
13	gain	Ska2
13	gain	Rnf213
13	gain	Gmnn
13	gain	Aldh5a1
13	gain	Fbp1
13	gain	Bag5
13	gain	Myc
13	gain	Zfp623
13	gain	Naga
13	gain	Muc13
13	gain	Trmt10c
13	gain	Zfp677
13	gain	Polr2d
13	gain	Rbfa
13	gain	Atg9a
13	gain	Prps1
13	gain	Cc2d1a
13	gain	Rnf31
13	gain	Smug1
13	gain	Msh5
13	gain	Sag
13	gain	Lmod1
13	gain	Fancg
13	gain	Aldh1b1
13	gain	Cptp
13	gain	Hsd17b11
13	gain	Smyd5
13	gain	Ntf3
13	gain	Parpbp
13	gain	Helb
13	gain	Erbb3
13	gain	Cyp4f18
13	gain	Sh2d4b
13	gain	Esyt3
13	gain	Fbxw21
13	gain	Abca9
13	gain	Pdgfb
13	gain	Kifc5b
13	gain	Kif20b
13	gain	Slc41a1
13	gain	Rab33b
13	gain	Hormad1
13	gain	Slc26a7
13	gain	Sh3rf2
13	gain	Tex43
13	gain	Ppp1r14b
13	gain	Gpam
13	gain	Olfml2b
13	gain	Gpr173
13	gain	Gnb4
13	gain	Moxd1
13	gain	Irak3
13	gain	Taf1c
13	gain	Gm8094
13	gain	Mtrf1
13	gain	Sec22c
13	gain	Prorsd1
13	gain	Mylip
13	gain	Zfp874b
13	gain	Tomm20l
13	gain	Hps1
13	gain	Dedd
13	gain	Tprn
13	gain	Zfp354a
13	gain	Lamb3
13	gain	Oip5
13	gain	Gm14401
13	gain	Ccne2
13	gain	Pi4k2b
13	gain	Tnpo2
13	gain	Cyb5d1
13	gain	Eci1
13	gain	Mex3c
13	gain	Eml3
13	gain	Cpn1
13	gain	Cr2
13	gain	Nemp1
13	gain	Got1l1
13	gain	Nlrp4f
13	gain	Snapc4
13	gain	Sgk2
13	gain	Renbp
13	gain	Selenbp2
13	gain	Dennd2c
13	gain	Tacr3
13	gain	Ttpa
13	gain	Eqtn
13	gain	Necap2
13	gain	2510039O18Rik
13	gain	Cdk6
13	gain	Gtpbp10
13	gain	Commd8
13	gain	Alkbh2
13	gain	Ssc4d
13	gain	Stag3
13	gain	Zfp772
13	gain	Hpn
13	gain	Gm2381
13	gain	Rccd1
13	gain	Nedd1
13	gain	Slc25a15
13	gain	Plekha2
13	gain	Cdh3
13	gain	Slc38a8
13	gain	Irf9
13	gain	Nop9
13	gain	Epsti1
13	gain	Rassf1
13	gain	Impdh2
13	gain	Cdc25a
13	gain	1110059G10Rik
13	gain	Ybx2
13	gain	Tmem106a
13	gain	Ftsj3
13	gain	Zfp759
13	gain	Ahr
13	gain	Ppp1r36
13	gain	Cdca7l
13	gain	Nelfe
13	gain	Adgrf5
13	gain	Rsph9
13	gain	Dclre1a
13	gain	Surf6
13	gain	Adamts13
13	gain	Brd3os
13	gain	Unc119b
13	gain	Mgam2-ps
13	gain	Adamts14
13	gain	Tppp3
13	gain	Dock6
13	gain	Ckmt2
13	gain	Enpp4
13	gain	Rxra
13	gain	Bahd1
13	gain	Kcnd1
13	gain	Rps11
13	gain	Nat9
13	gain	Slc28a3
13	gain	Tex21
13	gain	Oplah
13	gain	Espl1
13	gain	Vmn2r91
13	gain	Usp49
13	gain	Pp2d1
13	gain	Mrps2
13	gain	Yrdc
13	gain	Cercam
13	gain	Camk2n1
13	gain	Dolpp1
13	gain	Gm14418
13	gain	Abhd17c
13	gain	Prdm4
13	gain	Csrp2
13	gain	Ier5l
13	gain	Uck1
13	gain	Haus2
13	gain	Bcl2l11
13	gain	Rgs19
13	gain	Srpx2
13	gain	Bola1
13	gain	Nol6
13	gain	Spsb1
13	gain	Morn3
13	gain	Zfp418
13	gain	Mphosph10
13	gain	Fam169b
13	gain	Loxl1
13	gain	Zfp707
13	gain	Bop1
13	gain	Zfp647
13	gain	Card10
13	gain	1700088E04Rik
13	gain	Ccdc74a
13	gain	Abcb11
13	gain	Chrna9
13	gain	Clcn1
13	gain	Tnip3
13	gain	Med16
13	gain	Nip7
13	gain	Ets1
13	gain	Inca1
13	gain	Polr3h
13	gain	Fkbp7
13	gain	Pcna
13	gain	Bche
13	gain	H6pd
13	gain	Ckap4
13	gain	Capn9
13	gain	Adam21
13	gain	Kifc1
13	gain	Ppp1r1c
13	gain	Katnbl1
13	gain	Ccl28
13	gain	Rmdn3
13	gain	Actr5
13	gain	Zfp583
13	gain	Eci2
13	gain	Clic6
13	gain	Gm20431
13	gain	Rwdd3
13	gain	Casp6
13	gain	Hipk4
13	gain	Iah1
13	gain	Togaram2
13	gain	Zfp970
13	gain	Ebp
13	gain	Palmd
13	gain	Vmn2r59
13	gain	Cacng3
13	gain	Ccdc160
13	gain	Tktl1
13	gain	Lrrc23
13	gain	Fat4
13	gain	M1ap
13	gain	Nanos3
13	gain	Fam228b
13	gain	Bysl
13	gain	Nudt22
13	gain	Dapp1
13	gain	Cnr1
13	gain	Mrpl50
13	gain	9930104L06Rik
13	gain	D7Ertd443e
13	gain	Otud3
13	gain	Slc35e2
13	gain	Tmem143
13	gain	Alg8
13	gain	Rsad1
13	gain	Ttll12
13	gain	Brms1
13	gain	Rnf207
13	gain	Otogl
13	gain	Rfxank
13	gain	Plscr4
13	gain	Eif2b2
13	gain	Drc1
13	gain	Tube1
13	gain	Tti2
13	gain	Cdkn2aip
13	gain	Dok7
13	gain	Zfp607a
13	gain	Rgcc
13	gain	Card19
13	gain	Six4
13	gain	C330018D20Rik
13	gain	Lyar
13	gain	Camsap3
13	gain	Eaf1
13	gain	Zfp518b
13	gain	Eif2b1
13	gain	Eln
13	gain	Ufsp1
13	gain	Adamts9
13	gain	Llgl1
13	gain	Dyrk4
13	gain	Recql
13	gain	Egln2
13	gain	Zfp870
13	gain	Tead4
13	gain	Ampd3
13	gain	Pald1
13	gain	Tph2
13	gain	Nabp2
13	gain	Spsb3
13	gain	Slc7a2
13	gain	Rpp14
13	gain	Gm7233
13	gain	4930503E14Rik
13	gain	6430571L13Rik
13	gain	Gabrp
13	gain	Mgat1
13	gain	Iba57
13	gain	Rtp4
13	gain	Rnf112
13	gain	Ptrh2
13	gain	Tmem101
13	gain	Baiap2l2
13	gain	Sphk1
13	gain	Mettl23
13	gain	Pim3
13	gain	Dnal4
13	gain	Mpped1
13	gain	Fignl2
13	gain	Fbxo40
13	gain	Masp1
13	gain	Mog
13	gain	Slc35g1
13	loss	NA
14	gain	Maip1
14	gain	Nuak2
14	gain	Opn5
14	gain	Sec16b
14	gain	Fam78a
14	gain	Fbxo27
14	gain	Ghdc
14	gain	Dync2li1
14	gain	Zswim3
14	gain	Cstf1
14	gain	Gm14406
14	gain	Vmn1r4
14	gain	Ddx4
14	gain	Rab3il1
14	gain	Adgrl4
14	gain	C1galt1
14	gain	Obox1
14	gain	Cd200r2
14	gain	Mn1
14	gain	Kctd7
14	gain	Tfr2
14	gain	Dusp4
14	gain	Ripply2
14	gain	Thoc6
14	gain	Txnrd3
14	gain	Hsd17b14
14	gain	Zfp365
14	gain	Shmt2
14	gain	Mphosph6
14	gain	Prkcd
14	gain	Gpr83
14	gain	Robo3
14	gain	Nr1d1
14	gain	Itgb4
14	gain	Egln3
14	gain	Ahnak2
14	gain	Rad1
14	gain	Mep1a
14	gain	Vps37c
14	loss	Phlda3
14	loss	Nrsn2
14	loss	Fer1l4
14	loss	Phc1
14	loss	Syt17
14	loss	Basp1
14	loss	Mal2
14	loss	Dynlt1a
14	loss	mt-Atp6
14	loss	Maoa
14	loss	Aadat
14	loss	Il13ra1
14	loss	Fam3a
14	loss	Arxes1
14	loss	Tm7sf3
14	loss	Glra2
14	loss	Cgn
14	loss	Calb2
14	loss	Ptgfrn
14	loss	Plpp4
14	loss	Cd53
14	loss	Kcnc4
14	loss	Dnajc25
14	loss	Pax7
14	loss	Kcna6
14	loss	Cemip
14	loss	Marcks
14	loss	Baiap2
14	loss	Rfx4
14	loss	Adamts18
14	loss	Cib2
14	loss	B9d1
14	loss	Unc119
14	loss	Kcnj16
14	loss	Cys1
14	loss	Grap2
14	loss	Slc9c1
14	loss	Gm28961
15	gain	Sel1l3
15	gain	Nr2f1
15	gain	Nr2f2
15	gain	Cd24a
15	loss	Gm37988
15	loss	Rftn2
15	loss	Efhd1
15	loss	Rgsl1
15	loss	Tor3a
15	loss	Gm20532
15	loss	Col5a1
15	loss	Nostrin
15	loss	Hck
15	loss	Gm20458
15	loss	Gata1
15	loss	Zfp275
15	loss	Arhgap4
15	loss	Btk
15	loss	Hsd17b10
15	loss	Rfxap
15	loss	Iqgap3
15	loss	Cd160
15	loss	Esrp1
15	loss	Topors
15	loss	Tfap2e
15	loss	Spocd1
15	loss	Aunip
15	loss	Myom3
15	loss	Zfp984
15	loss	Faap20
15	loss	Kcnk3
15	loss	Hvcn1
15	loss	Wdr54
15	loss	Zfp787
15	loss	Vmn2r56
15	loss	Sult2a3
15	loss	Zfp541
15	loss	Mill2
15	loss	Zfp626
15	loss	Polr2i
15	loss	Mcee
15	loss	Kdm8
15	loss	Zfp646
15	loss	Sf3b5
15	loss	Hkdc1
15	loss	Asf1b
15	loss	Abcc12
15	loss	Dhodh
15	loss	Ndst2
15	loss	Adam2
15	loss	Aph1c
15	loss	Myo5c
15	loss	Scn11a
15	loss	Gas2l1
15	loss	Gas7
15	loss	Alox8
15	loss	Doc2b
15	loss	Slc46a1
15	loss	Asb16
15	loss	Sycp2l
15	loss	Fam151b
15	loss	Naip2
15	loss	Atp6v1c2
15	loss	Card6
15	loss	Itgb7
15	loss	Amhr2
15	loss	Tekt5
15	loss	Zdhhc19
15	loss	Adamts5
15	loss	Dxo
15	loss	Myrf
15	loss	Lpxn
15	loss	Fgfbp3
15	loss	Crisp4
15	loss	Mlph
15	loss	Ptpn14
15	loss	Ogfr
15	loss	Ggh
15	loss	1110017D15Rik
15	loss	Prpf31
15	loss	Trpm1
15	loss	Rrm1
15	loss	Vmn2r85
15	loss	Psme2
15	loss	Paqr5
15	loss	Crtap
15	loss	Taco1
15	loss	Col9a1
15	loss	Fgf16
15	loss	Pglyrp3
15	loss	Gusb
15	loss	5430401F13Rik
15	loss	Fam241b
15	loss	Sh3pxd2b
15	loss	Dynlt1f
15	loss	Cdk15
15	loss	Pglyrp1
15	loss	Dytn
15	loss	Map3k19
15	loss	Rgs2
15	loss	Scyl3
15	loss	Rad51
15	loss	Ncaph
15	loss	3300002I08Rik
15	loss	Gins1
15	loss	Slco4a1
15	loss	Rbmx2
15	loss	Clrn1
15	loss	Cfi
15	loss	Hyi
15	loss	Lck
15	loss	Padi3
15	loss	Padi1
15	loss	A430005L14Rik
15	loss	Triap1
15	loss	Rpusd3
15	loss	Tmem40
15	loss	Magohb
15	loss	Mansc1
15	loss	Dhx34
15	loss	Gsk3a
15	loss	Rexo5
15	loss	Zfp553
15	loss	Cnksr3
15	loss	Rps12
15	loss	Itgb2
15	loss	Gm10778
15	loss	Nt5dc3
15	loss	Has3
15	loss	Cdhr1
15	loss	Gm8104
15	loss	Tinf2
15	loss	Sorbs3
15	loss	Acsbg1
15	loss	Uaca
15	loss	Col6a4
15	loss	Cmtm7
15	loss	Tefm
15	loss	Cct6b
15	loss	Ska2
15	loss	Rnf213
15	loss	Gmnn
15	loss	Aldh5a1
15	loss	Fbp1
15	loss	Bag5
15	loss	Myc
15	loss	Zfp623
15	loss	Naga
15	loss	Muc13
15	loss	Trmt10c
15	loss	Zfp677
15	loss	Polr2d
15	loss	Rbfa
15	loss	Bard1
15	loss	Pigt
15	loss	Megf6
15	loss	Tspan33
15	loss	Chrd
15	loss	Nmur1
15	loss	BC055324
15	loss	Ggta1
15	loss	Tfpi
15	loss	Ccdc32
15	loss	Itga10
15	loss	Tmem53
15	loss	Dhx37
15	loss	Dtx2
15	loss	Kcp
15	loss	Sult2a2
15	loss	Tead2
15	loss	Il16
15	loss	Ric8a
15	loss	Slc26a10
15	loss	Mmrn2
15	loss	Phyhip
15	loss	Aste1
15	loss	Twf2
15	loss	Nit2
15	loss	Zfy1
15	loss	Casp7
15	loss	Gpr35
15	loss	Fmo1
15	loss	Vash2
15	loss	Fpgs
15	loss	Tyro3
15	loss	Dnmt3c
15	loss	Nudt10
15	loss	Rap2c
15	loss	Pin4
15	loss	Gla
15	loss	Tbc1d8b
15	loss	Ints12
15	loss	Bcl10
15	loss	Polr1e
15	loss	Pigv
15	loss	Clcnka
15	loss	Mmd2
15	loss	Nod1
15	loss	Mxd1
15	loss	Bhlhe40
15	loss	Bid
15	loss	Zfp93
15	loss	Abracl
15	loss	Rtkn2
15	loss	Mier2
15	loss	Plat
15	loss	Spcs3
15	loss	Gm5458
15	loss	Cfap70
15	loss	Comtd1
15	loss	Ppif
15	loss	Ephx2
15	loss	R3hcc1
15	loss	Barx2
15	loss	Rpusd4
15	loss	Aph1b
15	loss	Emid1
15	loss	Fbxw10
15	loss	Gm884
15	loss	Aanat
15	loss	Gm10037
15	loss	Rdh11
15	loss	Nrde2
15	loss	Serpina1b
15	loss	Dab2
15	loss	Ankrd33b
15	loss	Hira
15	loss	Trat1
15	loss	Crybg3
15	loss	Sh3bgr
15	loss	Dact2
15	loss	Zfp213
15	loss	Gfer
15	loss	Nubp2
15	loss	Pnpla1
15	loss	H2-Bl
15	loss	Frs3
15	loss	Acaa2
15	loss	1810055G02Rik
15	loss	Ehbp1l1
15	loss	Slc22a20
15	loss	Uqcc3
15	loss	Myof
15	loss	Cdh19
15	loss	Adora1
15	loss	Cd247
15	loss	Zkscan16
15	loss	Slc6a1
15	loss	Tyr
15	loss	B4galnt4
15	loss	Igf1
15	loss	Glra3
15	loss	Gm3488
15	loss	Atp1b2
15	loss	Rab40b
15	loss	Fyb
15	loss	Ly6e
15	loss	Creld2
15	loss	Rfx2
15	loss	Prkd3
15	loss	Gm21704
15	loss	mt-Atp8
15	loss	Slc41a1
15	loss	Rab33b
15	loss	Hormad1
15	loss	Slc26a7
15	loss	Sh3rf2
15	loss	Tex43
15	loss	Ppp1r14b
15	loss	Gpam
15	loss	Zfp281
15	loss	Pogk
15	loss	Skida1
15	loss	4921504E06Rik
15	loss	Gad1
15	loss	Zfp334
15	loss	Lyrm2
15	loss	Tmem233
15	loss	Slc28a1
15	loss	Pwp2
15	loss	Tmprss5
15	loss	Tmed3
15	loss	Clhc1
15	loss	Armc7
15	loss	Srp54b
15	loss	Slc38a4
15	loss	Kcnh3
15	loss	Ets2
15	loss	Mrpl16
15	loss	Pappa2
15	loss	Spata45
15	loss	Cd36
15	loss	Nyap1
15	loss	Cabcoco1
15	loss	Il17d
15	loss	Fbln1
15	loss	Itga5
15	loss	Ildr2
15	loss	Cd84
15	loss	Apbb1ip
15	loss	Ptgis
15	loss	Cdc45
15	loss	Wdr64
15	loss	Nlrp2
15	loss	Cngb1
15	loss	Cant1
15	loss	Ocln
15	loss	Dusp10
15	loss	Cep250
15	loss	Rasef
15	loss	Cnpy1
15	loss	Tspan14
15	loss	Gfpt2
15	loss	Id2
15	loss	Snapc4
15	loss	Sgk2
15	loss	Renbp
15	loss	Selenbp2
15	loss	Dennd2c
15	loss	Tacr3
15	loss	Ttpa
15	loss	Eqtn
15	loss	Necap2
15	loss	2510039O18Rik
15	loss	Cdk6
15	loss	Gtpbp10
15	loss	Commd8
15	loss	Alkbh2
15	loss	Ssc4d
15	loss	Stag3
15	loss	Zfp772
15	loss	Hpn
15	loss	Gm2381
15	loss	Rccd1
15	loss	Nedd1
15	loss	Slc25a15
15	loss	Plekha2
15	loss	Cdh3
15	loss	Slc38a8
15	loss	Irf9
15	loss	Nop9
15	loss	Epsti1
15	loss	Rassf1
15	loss	Impdh2
15	loss	Cdc25a
15	loss	1110059G10Rik
15	loss	Ybx2
15	loss	Tmem106a
15	loss	Ftsj3
15	loss	Zfp759
15	loss	Ahr
15	loss	Ppp1r36
15	loss	Cdca7l
15	loss	Nelfe
15	loss	Adgrf5
15	loss	Rsph9
15	loss	Dclre1a
15	loss	Brd3os
15	loss	Unc119b
15	loss	Mgam2-ps
15	loss	Adamts14
15	loss	Tppp3
15	loss	Dock6
15	loss	Ckmt2
15	loss	Enpp4
15	loss	Rxra
15	loss	Bahd1
15	loss	Kcnd1
15	loss	Rps11
15	loss	Nat9
15	loss	Slc28a3
15	loss	Tex21
15	loss	Oplah
15	loss	Espl1
15	loss	Vmn2r91
15	loss	Usp49
15	loss	Pp2d1
15	loss	Cercam
15	loss	Camk2n1
15	loss	Ptges
15	loss	Dnajc5b
15	loss	Sdc3
15	loss	Cnr2
15	loss	Ptprh
15	loss	Kctd2
15	loss	Abcb11
15	loss	Chrna9
15	loss	Clcn1
15	loss	Tnip3
15	loss	Med16
15	loss	Nip7
15	loss	Ets1
15	loss	Inca1
15	loss	Polr3h
15	loss	Fkbp7
15	loss	Pcna
15	loss	Bche
15	loss	H6pd
15	loss	Ckap4
15	loss	Capn9
15	loss	Adam21
15	loss	Kifc1
15	loss	Pramel7
15	loss	Patl2
15	loss	Ckap2l
15	loss	Ost4
15	loss	Tmem43
15	loss	Cenpt
15	loss	Nepro
15	loss	Wnt8b
15	loss	Fam210b
15	loss	Prdx4
15	loss	Amigo1
15	loss	Slc15a5
15	loss	Lair1
15	loss	Gch1
15	loss	Scara5
15	loss	Tpo
15	loss	Ebp
15	loss	Palmd
15	loss	Vmn2r59
15	loss	Cacng3
15	loss	Rai2
15	loss	Slc5a1
15	loss	Chrm2
15	loss	Isyna1
15	loss	Gm3002
15	loss	Rps23
15	loss	mt-Nd6
15	loss	Prss12
15	loss	Lmnb2
15	loss	Slc15a2
15	loss	Otof
15	loss	Rtkn
15	loss	Arg2
15	loss	Igsf5
15	loss	Mrpl49
15	loss	Lyar
15	loss	Camsap3
15	loss	Eaf1
15	loss	Naaa
15	loss	Ufsp1
15	loss	Ephb4
15	loss	Gpr162
15	loss	Tmem91
15	loss	Nabp2
15	loss	Spsb3
15	loss	Rsl24d1
15	loss	Mobp
15	loss	Patz1
15	loss	Pxdn
15	loss	Esr2
15	loss	Mettl7a3
15	loss	Ncapg2
15	loss	Nde1
15	loss	Batf2
15	loss	Hmga1
15	loss	Mog
15	loss	Fbn2
16	gain	Tram2
16	gain	Gm7592
16	gain	Cd55
16	gain	Prrx2
16	gain	Harbi1
16	gain	Hapln2
16	gain	Bmp8a
16	gain	Sesn2
16	gain	Gm43552
16	gain	Ndnf
16	gain	Ogg1
16	gain	Zfp422
16	gain	Vmn1r73
16	gain	Pla2g4c
16	gain	Aen
16	gain	Slc5a11
16	gain	Bag3
16	gain	Cox8b
16	gain	Ifngr1
16	gain	Gm3164
16	gain	Tinag
16	gain	Slc36a3
16	gain	Gpr179
16	gain	Plekhh3
16	gain	Naip6
16	gain	Slc7a15
16	gain	Heatr4
16	gain	Amacr
16	gain	Arhgap8
16	gain	Mrps18b
16	gain	Tbcc
16	gain	Gm10184
16	gain	Daw1
16	gain	Capn6
16	gain	Sfrp2
16	gain	Mrps30
16	gain	Gpr68
16	gain	Tg
16	gain	Pfkfb2
16	gain	Zbtb6
16	gain	Bpifb5
16	gain	Cldn34d
16	gain	Selenbp1
16	gain	Sass6
16	gain	Trmo
16	gain	Vwa5b1
16	gain	Cad
16	gain	Oasl1
16	gain	Efcc1
16	gain	Gucy2c
16	gain	Tdrd12
16	gain	Gm45799
16	gain	Misp
16	gain	Kcnmb4
16	gain	Lsm11
16	gain	Edaradd
16	gain	Naip5
16	gain	Riox2
16	gain	Bace2
16	gain	Pgm5
16	gain	Cyp2c67
16	gain	Ddx59
16	gain	Emd
16	gain	Tmem144
16	gain	Cth
16	gain	Musk
16	gain	Mettl27
16	gain	Cand2
16	gain	Mt2
16	gain	Nqo1
16	gain	Adam7
16	gain	Snrnp25
16	gain	Med7
16	gain	Ttc23l
16	gain	Zfp820
16	gain	Mad2l1bp
16	gain	Gpr161
16	gain	Lrrc8e
16	gain	Opn3
16	gain	Ppp1r35
16	gain	Aimp2
16	gain	Usf2
16	gain	Zfp629
16	gain	Diras2
16	gain	Spata9
16	gain	Itih2
16	gain	Utp3
16	gain	Prrg2
16	gain	Rpusd1
16	gain	Pla2r1
16	gain	Mvk
16	gain	Gm8206
16	gain	Mybpc3
16	gain	Gpr149
16	gain	Snca
16	gain	Mpp3
16	gain	Fam171a2
16	gain	Bdnf
16	gain	Cbln4
16	gain	Penk
16	gain	Sec61b
16	gain	Dhcr24
16	gain	Col8a2
16	gain	Srd5a3
16	gain	Apobec1
16	gain	Zfp112
16	gain	Smpdl3a
16	gain	Thop1
16	gain	Caps2
16	gain	Ap1m2
16	gain	Rgl3
16	gain	Cd276
16	gain	Sat2
16	gain	Plscr3
16	gain	Wnt3
16	gain	Trim47
16	gain	Syk
16	gain	Abcb5
16	gain	Ercc3
16	gain	Tmub1
16	gain	Myo18b
16	gain	Cgref1
16	gain	Cox7b2
16	gain	Slc2a12
16	gain	Dyrk2
16	gain	Chrac1
16	gain	Ccnd2
16	gain	BC025920
16	gain	Pcsk1
16	gain	Gfra2
16	gain	Trpv2
16	gain	Dvl2
16	gain	Klhl11
16	gain	Dpys
16	gain	Cacnb3
16	gain	Hgd
16	gain	Entpd1
16	loss	Fignl2
16	loss	Fbxo40
17	gain	4931428L18Rik
17	gain	Fnbp1l
17	gain	4933424G06Rik
17	gain	Mdh1b
17	gain	Rgs9
17	gain	Gpr161
17	gain	Lrrc8e
17	gain	Mybpc3
17	gain	Gpr149
17	gain	Snca
17	gain	Mpp3
17	gain	Fam171a2
17	gain	Bdnf
17	gain	Ctxn2
17	gain	Ly6h
17	gain	Cbln4
17	gain	Zcchc12
17	gain	6330403K07Rik
17	gain	Rab26
17	gain	Zfp57
17	gain	Penk
17	gain	Col27a1
17	gain	Dhcr24
17	gain	Cgref1
17	gain	Sel1l3
17	gain	Nr2f1
17	gain	Fscn1
17	gain	Ankrd7
17	gain	Nectin2
17	gain	Ccnd2
17	gain	Ccdc106
17	gain	Fam174b
17	gain	BC025920
17	gain	Pcsk1
17	gain	Adgrg1
17	gain	Zfp395
17	gain	Gfra2
17	gain	Trpv2
17	gain	Imp3
17	gain	Arhgef15
17	gain	Dvl2
17	gain	Hgd
17	gain	Xdh
17	gain	Slc22a19
17	loss	NA
18	gain	Maip1
18	gain	Pnck
18	gain	Plxna3
18	gain	Aldoart2
18	gain	Disp3
18	gain	Cacna1g
18	gain	Stap1
18	gain	Mn1
18	gain	Fam81b
18	gain	Plxnb2
18	loss	Ly96
18	loss	Cyp27a1
18	loss	Pdcl
18	loss	Exd1
18	loss	Shc1
18	loss	Riiad1
18	loss	Aph1a
18	loss	Chd1l
18	loss	Kyat3
18	loss	Anp32b
18	loss	Zfp189
18	loss	Cyp2j6
18	loss	Tmem69
18	loss	Ppcs
18	loss	Pdik1l
18	loss	Mrto4
18	loss	Rest
18	loss	Adck2
18	loss	Smim17
18	loss	Exosc5
18	loss	BC024978
18	loss	Zfp382
18	loss	Fan1
18	loss	Det1
18	loss	Ccdc81
18	loss	Hebp2
18	loss	Mettl1
18	loss	Tma16
18	loss	Mss51
18	loss	Setdb2
18	loss	Gnrh1
18	loss	Rubcnl
18	loss	Lrrc63
18	loss	Jaml
18	loss	Trim43c
18	loss	Anapc13
18	loss	Wdr48
18	loss	Zfp454
18	loss	Tax1bp3
18	loss	Dhrs11
18	loss	Zfp825
18	loss	Ptger4
18	loss	Sun2
18	loss	P2rx6
18	loss	Polr2h
18	loss	Hes1
18	loss	Ccdc14
18	loss	Zfp983
18	loss	Washc1
18	loss	Eif2ak2
18	loss	Grpel2
18	loss	Bag2
18	loss	Ankar
18	loss	Trpm8
18	loss	Aim2
18	loss	Scand1
18	loss	Eda2r
18	loss	Adgrg2
18	loss	Mov10
18	loss	Frrs1
18	loss	Hadh
18	loss	Cenpe
18	loss	1700022I11Rik
18	loss	AU022252
18	loss	Stpg1
18	loss	Akr7a5
18	loss	Ubiad1
18	loss	5730480H06Rik
18	loss	Noc4l
18	loss	Mlxipl
18	loss	Ptcd1
18	loss	Slc25a18
18	loss	Foxj2
18	loss	Pop4
18	loss	Atp2a1
18	loss	Ano1
18	loss	Prdm1
18	loss	Gna15
18	loss	Gm19410
18	loss	Naf1
18	loss	Slc18a1
18	loss	Pmfbp1
18	loss	Oxnad1
18	loss	Rnf212b
18	loss	Ppan
18	loss	Tgfbr2
18	loss	2810021J22Rik
18	loss	Tsr1
18	loss	Cdk5rap3
18	loss	Arhgap27
18	loss	Fdxr
18	loss	6720489N17Rik
18	loss	Naip1
18	loss	Cdc20b
18	loss	Dus4l
18	loss	Triobp
18	loss	Phf21b
18	loss	Rabl3
18	loss	Cchcr1
18	loss	Taf8
18	loss	Epas1
18	loss	Sipa1
18	loss	Cfap65
18	loss	Obsl1
18	loss	Rgs4
18	loss	Them7
18	loss	Duox1
18	loss	Gss
18	loss	Zfp217
18	loss	Gm14288
18	loss	Exosc8
18	loss	Il6ra
18	loss	Tmem64
18	loss	Gabrr2
18	loss	Tpm2
18	loss	Pax5
18	loss	Cpt2
18	loss	Spata21
18	loss	Tmem243
18	loss	Wfs1
18	loss	Dgkq
18	loss	Oas1f
18	loss	Rilpl2
18	loss	Zfp316
18	loss	Vmn2r55
18	loss	Zfp180
18	loss	Lysmd4
18	loss	Ticrr
18	loss	Ino80e
18	loss	Zfp668
18	loss	Mtfr2
18	loss	Shcbp1
18	loss	Ddx49
18	loss	Cdh5
18	loss	Pkd1l3
18	loss	Mlkl
18	loss	Polr3d
18	loss	Rcbtb2
18	loss	Glb1l3
18	loss	Thoc3
18	loss	Rmi1
18	loss	Wdr53
18	loss	Fosl1
18	loss	Frmd8
18	loss	Ahnak
18	loss	Asic4
18	loss	Ephx1
18	loss	Tgfb2
18	loss	Traf2
18	loss	Smox
18	loss	Cdh26
18	loss	Emcn
18	loss	Cryz
18	loss	Nudt2
18	loss	Dnajb5
18	loss	Clspn
18	loss	Gpr3
18	loss	Mfsd10
18	loss	Casp2
18	loss	Zscan5b
18	loss	Blvrb
18	loss	Alpk3
18	loss	Lrrc75b
18	loss	Gipc1
18	loss	Fbxw9
18	loss	Fbxo22
18	loss	Etaa1
18	loss	Ppp1r9b
18	loss	Ripk1
18	loss	Mcur1
18	loss	Pigh
18	loss	Flvcr2
18	loss	Vit
18	loss	Rpl17
18	loss	Nmur1
18	loss	BC055324
18	loss	Ggta1
18	loss	Tfpi
18	loss	Ccdc32
18	loss	Itga10
18	loss	Tmem53
18	loss	Dhx37
18	loss	Dtx2
18	loss	Kcp
18	loss	Sult2a2
18	loss	Tead2
18	loss	Il16
18	loss	Ric8a
18	loss	Slc26a10
18	loss	Mmrn2
18	loss	Phyhip
18	loss	Aste1
18	loss	Twf2
18	loss	Nit2
18	loss	Zfy1
18	loss	Casp7
18	loss	Gpr35
18	loss	Fmo1
18	loss	Vash2
18	loss	Fpgs
18	loss	Tyro3
18	loss	Dnmt3c
18	loss	Nudt10
18	loss	Rap2c
18	loss	Pin4
18	loss	Gla
18	loss	Tbc1d8b
18	loss	Ints12
18	loss	Bcl10
18	loss	Polr1e
18	loss	Pigv
18	loss	Clcnka
18	loss	Mmd2
18	loss	Nod1
18	loss	Mxd1
18	loss	Bhlhe40
18	loss	Bid
18	loss	Zfp93
18	loss	Abracl
18	loss	Rtkn2
18	loss	Mier2
18	loss	Plat
18	loss	Spcs3
18	loss	Gm5458
18	loss	Cfap70
18	loss	Comtd1
18	loss	Ppif
18	loss	Ephx2
18	loss	R3hcc1
18	loss	Barx2
18	loss	Rpusd4
18	loss	Aph1b
18	loss	Emid1
18	loss	Fbxw10
18	loss	Gm884
18	loss	Aanat
18	loss	Gm10037
18	loss	Rdh11
18	loss	Nrde2
18	loss	Serpina1b
18	loss	Dab2
18	loss	Ankrd33b
18	loss	Hira
18	loss	Trat1
18	loss	Crybg3
18	loss	Sh3bgr
18	loss	Dact2
18	loss	Zfp213
18	loss	Gfer
18	loss	Nubp2
18	loss	Pnpla1
18	loss	H2-Bl
18	loss	Frs3
18	loss	Acaa2
18	loss	1810055G02Rik
18	loss	Ehbp1l1
18	loss	Slc22a20
18	loss	Uqcc3
18	loss	Myof
18	loss	Tnfrsf11a
18	loss	Npl
18	loss	Tada1
18	loss	Gm14403
18	loss	Med12
18	loss	Timm8a1
18	loss	Foxo1
18	loss	Cnn3
18	loss	Tmem268
18	loss	Pafah2
18	loss	Nmnat1
18	loss	Tacc3
18	loss	Acad12
18	loss	Chst12
18	loss	Hpgds
18	loss	Klf15
18	loss	Bcat2
18	loss	Acan
18	loss	Relt
18	loss	Ltv1
18	loss	Xab2
18	loss	Upf3a
18	loss	Tdrp
18	loss	Zfp709
18	loss	Cln5
18	loss	Ankrd49
18	loss	Slc37a4
18	loss	Mief2
18	loss	Elac2
18	loss	Zkscan6
18	loss	Zfp874a
18	loss	Zfp748
18	loss	Snx18
18	loss	Rnaseh1
18	loss	Frmd6
18	loss	Syne3
18	loss	Exosc4
18	loss	Dmc1
18	loss	Scube3
18	loss	Trim36
18	loss	Srfbp1
18	loss	Rnaseh2c
18	loss	Zfp281
18	loss	Pogk
18	loss	Skida1
18	loss	4921504E06Rik
18	loss	Gad1
18	loss	Zfp334
18	loss	Lyrm2
18	loss	Tmem233
18	loss	Slc28a1
18	loss	Pwp2
18	loss	Tmprss5
18	loss	Tmed3
18	loss	Clhc1
18	loss	Armc7
18	loss	Srp54b
18	loss	Slc38a4
18	loss	Kcnh3
18	loss	Ets2
18	loss	Mrpl16
18	loss	Ptprc
18	loss	Tomm40l
18	loss	Melk
18	loss	Pus1
18	loss	Dusp10
18	loss	Cep250
18	loss	Rasef
18	loss	Cnpy1
18	loss	Tspan14
18	loss	Gfpt2
18	loss	Id2
18	loss	Coq4
18	loss	Gtf3c6
18	loss	Chrnb1
18	loss	Fbxl6
18	loss	Ptges
18	loss	Dnajc5b
18	loss	Sdc3
18	loss	Cnr2
18	loss	Ptprh
18	loss	Kctd2
18	loss	Nek6
18	loss	Gm572
18	loss	Fut10
18	loss	Acpp
18	loss	Endov
18	loss	Dhfr
18	loss	Pkd2l1
18	loss	Timm10
18	loss	Accs
18	loss	Pced1a
18	loss	Eif6
18	loss	Gm14444
18	loss	Gpc4
18	loss	Zfp449
18	loss	Car5b
18	loss	Ufm1
18	loss	Pigo
18	loss	Ogfod2
18	loss	Zfp12
18	loss	Zfp606
18	loss	Sars2
18	loss	Gm20449
18	loss	Sh2b1
18	loss	Bckdk
18	loss	Mtrf1l
18	loss	Cdc34
18	loss	Adamtsl5
18	loss	Mrpl54
18	loss	Fgd6
18	loss	Mdm1
18	loss	Ankrd52
18	loss	Gdf11
18	loss	Mak16
18	loss	Car7
18	loss	Med4
18	loss	Lcp1
18	loss	Zpr1
18	loss	Snapc5
18	loss	Mrps22
18	loss	Acad11
18	loss	Rnf123
18	loss	Mrm1
18	loss	Lrrc59
18	loss	Mplkip
18	loss	Arsk
18	loss	Tmem267
18	loss	Ankrd9
18	loss	Apol8
18	loss	Ccdc65
18	loss	Tbccd1
18	loss	Ccnf
18	loss	Gtf2h4
18	loss	Spats1
18	loss	Zbtb14
18	loss	Cdc42ep3
18	loss	Slc26a2
18	loss	Poli
18	loss	Zdhhc24
18	loss	Ldb1
18	loss	Zfp971
18	loss	Ankub1
18	loss	Ap1ar
18	loss	Vrk3
18	loss	Morc2b
18	loss	Hrh3
18	loss	Lrrd1
18	loss	Mmgt1
18	loss	Tiparp
18	loss	Lrrc39
18	loss	Gtpbp6
18	loss	Cyp2b13
18	loss	Sap30l
18	loss	Rdm1
18	loss	Catsper3
18	loss	Il33
18	loss	Gpatch4
18	loss	Zfp687
18	loss	Wls
18	loss	Wdr91
18	loss	Ccne1
18	loss	Zbtb5
18	loss	Alg11
18	loss	Scube1
18	loss	Tmod1
18	loss	Acot11
18	loss	Gltp
18	loss	P2rx7
18	loss	Nudt1
18	loss	Lss
18	loss	P3h1
18	loss	Rhbdl2
18	loss	Zfp94
18	loss	Rara
18	loss	Trpt1
18	loss	Gpr157
18	loss	Lap3
18	loss	Ggct
18	loss	Rin3
18	loss	Cyp2c66
18	loss	Fbxo46
18	loss	Adgrl1
18	loss	Atp6ap1l
18	loss	Taf5
19	gain	Lamc2
19	gain	Gng11
19	gain	Socs2
19	gain	Obscn
19	gain	Zswim3
19	gain	Cnr1
19	gain	Dnajc30
19	gain	Cyp2t4
19	gain	Lrfn3
19	gain	Dbp
19	gain	Nr2f2
19	gain	Cd24a
19	gain	Itgad
19	gain	Zfp365
19	gain	Shmt2
19	gain	Snrpf
19	gain	Tmem109
19	gain	Nabp2
19	gain	Spsb3
19	gain	Prkcd
19	gain	Tmem101
19	gain	Baiap2l2
19	gain	Faap100
19	gain	Gcnt2
19	gain	Mroh5
19	gain	Pycrl
19	gain	Dnal4
19	gain	AI837181
19	gain	Slc35g1
19	loss	Cbln4
19	loss	Cgn
19	loss	Calb2
19	loss	Stxbp3
19	loss	Man2b2
19	loss	Rgs10
19	loss	Gm20521
19	loss	Prss12
19	loss	Lmnb2
19	loss	Slc15a2
19	loss	Exosc3
19	loss	Pax7
19	loss	Vmn2r27
19	loss	Ccdc43
19	loss	Abca8b
19	loss	Gen1
19	loss	Cd63
19	loss	Mobp
19	loss	Patz1
20	gain	Kcnip3
20	gain	Rraga
20	gain	Qpct
20	gain	Cidea
20	gain	Cyp2c70
20	gain	Bex1
20	gain	Aldob
20	gain	Fxyd6
20	gain	Cacng4
20	gain	Mog
20	loss	Crisp4
20	loss	Mlph
20	loss	Ptpn14
20	loss	Ogfr
20	loss	Ggh
20	loss	1110017D15Rik
20	loss	Prpf31
20	loss	Trpm1
20	loss	Rrm1
20	loss	Vmn2r85
20	loss	Psme2
20	loss	Paqr5
20	loss	Crtap
20	loss	Taco1
20	loss	Mars2
20	loss	Ankzf1
20	loss	Colgalt2
20	loss	B4galt3
20	loss	Tnks1bp1
20	loss	Pex16
20	loss	Fam98b
20	loss	Gm14412
20	loss	Fam217b
20	loss	Tfe3
20	loss	Nkrf
20	loss	Abcd1
20	loss	Cmc4
20	loss	Amer1
20	loss	Morc4
20	loss	Nudt6
20	loss	Isg20l2
20	loss	Glmp
20	loss	Mtx1
20	loss	Mcl1
20	loss	Prkab2
20	loss	Ttf2
20	loss	Gpr61
20	loss	Lrriq3
20	loss	Msantd3
20	loss	Plpp3
20	loss	Cfap57
20	loss	Rimkla
20	loss	Gpatch3
20	loss	Selenon
20	loss	Mthfr
20	loss	Pusl1
20	loss	Napepld
20	loss	Nupl2
20	loss	Zbtb49
20	loss	Rassf6
20	loss	Abcb9
20	loss	Lsm8
20	loss	Fkbp14
20	loss	Anxa4
20	loss	Tigar
20	loss	Spx
20	loss	Etfrf1
20	loss	Vasp
20	loss	Zfp61
20	loss	Saal1
20	loss	Cers3
20	loss	Mtg1
20	loss	Ddo
20	loss	Mettl24
20	loss	Scml4
20	loss	Slc29a3
20	loss	Krr1
20	loss	Ddit3
20	loss	Arhgef10
20	loss	Casp3
20	loss	Ntpcr
20	loss	Gm3667
20	loss	Mdp1
20	loss	Chek1
20	loss	Cxcr5
20	loss	Fam219b
20	loss	Cd109
20	loss	Pgm3
20	loss	Nmnat3
20	loss	Cx3cr1
20	loss	Hhatl
20	loss	Slc6a20b
20	loss	Ccng1
20	loss	Proca1
20	loss	Rasl10b
20	loss	Fam117a
20	loss	Becn1
20	loss	Smarcd2
20	loss	Slc26a11
20	loss	Zkscan8
20	loss	Bloc1s5
20	loss	Cdk20
20	loss	Rfesd
20	loss	Poc5
20	loss	Srp54a
20	loss	Vcpkmt
20	loss	Trmt5
20	loss	Ptp4a3
20	loss	Tob2
20	loss	Slx4
20	loss	Gspt1
20	loss	Pkp2
20	loss	Ccdc191
20	loss	Zfp758
20	loss	Gnl1
20	loss	H2-T22
20	loss	Daam2
20	loss	Mro
20	loss	Adnp2
20	loss	Cpt1a
20	loss	Mrpl11
20	loss	Eif1ad
20	loss	Gna14
20	loss	Nmrk1
20	loss	Avpi1
20	loss	Fbxl15
20	loss	Lhx4
20	loss	F11r
20	loss	Lyplal1
20	loss	Gm13889
20	loss	Rbbp9
20	loss	Tdrkh
20	loss	2410004B18Rik
20	loss	Dffb
20	loss	Cdk11b
20	loss	Trmt44
20	loss	Tmprss11d
20	loss	Sh2b3
20	loss	Rtn2
20	loss	Ccdc97
20	loss	Usp35
20	loss	Tcf3
20	loss	Rexo1
20	loss	Yeats4
20	loss	Stxbp2
20	loss	Col4a1
20	loss	Aga
20	loss	Tepsin
20	loss	Nop16
20	loss	Ttc33
20	loss	Alg12
20	loss	Cd320
20	loss	Hsd17b7
20	loss	Crp
20	loss	Slc39a13
20	loss	Zfp335
20	loss	Sall4
20	loss	Usp26
20	loss	Spata1
20	loss	Plag1
20	loss	Fbxo6
20	loss	Cwh43
20	loss	Gm35315
20	loss	Tchp
20	loss	Sh2b2
20	loss	Zkscan5
20	loss	Try10
20	loss	Fam221a
20	loss	Ccdc9
20	loss	Fbxo17
20	loss	Fut2
20	loss	Arpin
20	loss	9430038I01Rik
20	loss	Gatd1
20	loss	Atoh7
20	loss	Eef1akmt3
20	loss	Rdh5
20	loss	Prag1
20	loss	Exoc8
20	loss	Il17rd
20	loss	Gmpr2
20	loss	Blk
20	loss	Fli1
20	loss	Adamts7
20	loss	Hmmr
20	loss	Trim7
20	loss	Kat2a
20	loss	Slc25a47
20	loss	Fam186b
20	loss	Impg2
20	loss	N6amt1
20	loss	Ifnar2
20	loss	Chaf1a
20	loss	Patl2
20	loss	Ckap2l
20	loss	Ost4
20	loss	Tmem43
20	loss	Cenpt
20	loss	Nepro
20	loss	Wnt8b
20	loss	Cdc25b
20	loss	Srprb
20	loss	Map3k14
20	loss	Nelfcd
20	loss	Casp9
20	loss	Cldn10
20	loss	Mb
20	loss	Ighmbp2
20	loss	Fam3a
20	loss	Fkbp6
20	loss	Xrcc1
20	loss	Kcnip2
20	loss	Lsm3
20	loss	Gm5724
20	loss	Afap1l1
20	loss	C5ar1
20	loss	Nmbr
20	loss	Ybey
20	loss	Lrp2bp
20	loss	Natd1
20	loss	Zfpl1
20	loss	Unc5b
20	loss	Rfx4
20	loss	Tbrg1
20	loss	Imp3
20	loss	B9d1
20	loss	Dvl2
20	loss	Rbm11
20	loss	Klhl14
20	loss	Elac1
21	gain	Alkal1
21	gain	Eya1
21	gain	Gemin8
21	gain	1110065P20Rik
21	gain	Slc6a16
21	gain	Maz
21	gain	Cd2bp2
21	gain	Fbxl8
21	gain	Nid2
21	gain	Cflar
21	gain	Ppef1
21	gain	Ap1s3
21	gain	Itih5
21	gain	Mtmr11
21	gain	Fam47e
21	gain	Pml
21	gain	Mpdu1
21	gain	C9
21	gain	Mrpl44
21	gain	Hmcn2
21	gain	Bmx
21	gain	Stra6l
21	gain	Rad54l
21	gain	Kntc1
21	gain	Actg2
21	gain	Trim30d
21	gain	Tysnd1
21	gain	Pelp1
21	gain	Tfap4
21	gain	Iqca
21	gain	3110009E18Rik
21	gain	Cyb5r1
21	gain	Trp53bp2
21	gain	Mgme1
21	gain	Ampd1
21	gain	Mdfic
21	gain	Fam136a
21	gain	Slc1a5
21	gain	Nlrp9b
21	gain	Ttc23
21	gain	Rgma
21	gain	Plekhb1
21	gain	Mfsd12
21	gain	Ptk2b
21	gain	Adam28
21	gain	Bud13
21	gain	4930550C14Rik
21	gain	Pth1r
21	gain	Lgalsl
21	gain	Shmt1
21	gain	Pex12
21	gain	Snx11
21	gain	Qrich2
21	gain	Cmya5
21	gain	Bhmt2
21	gain	Tex22
21	gain	Npcd
21	gain	Apobec3
21	gain	Flywch2
21	gain	Slc37a1
21	gain	Capn13
21	gain	Prelid2
21	gain	Sh3tc2
21	gain	Pdlim1
21	gain	Nuak2
21	gain	Opn5
21	gain	Teddm2
21	gain	Abca15
21	gain	Sec16b
21	gain	Fcrla
21	gain	Klra17
21	gain	Cdhr2
21	gain	Vangl2
21	gain	Pigm
21	gain	Prmt6
21	gain	Slc9b1
21	gain	Gbp5
21	gain	Tmem240
21	gain	Srrd
21	gain	Etfbkmt
21	gain	Nlrp4e
21	gain	Tmem97
21	gain	Dsc3
21	gain	Rnf125
21	gain	Med22
21	gain	Klhl23
21	gain	Nphp1
21	gain	Frg2f1
21	gain	Rbmxl1
21	gain	Evpl
21	gain	Arrdc3
21	gain	H1f0
21	gain	Jcad
21	gain	Ranbp6
21	gain	Pla2r1
21	gain	Mvk
21	gain	Gm8206
21	gain	Tbr1
21	gain	Samd3
21	gain	Itga4
21	gain	Cldn11
21	gain	Cstf1
21	gain	Gm14406
21	gain	Vmn1r4
21	gain	Ddx4
21	gain	Rab3il1
21	gain	Hnf4g
21	gain	Adcy4
21	gain	Sertm1
21	gain	Ctss
21	gain	B3galt6
21	gain	Abcg3
21	gain	Gpn3
21	gain	Syne4
21	gain	AI987944
21	gain	4932415D10Rik
[truncated: 5,258 more rows]

## Sheet: G. gal.
Table S7-2. Identified gain and loss of genes for the node of chicken CN.
Node	Type	Gene name
10	gain	METTL2B
10	gain	HAS3
10	gain	ADORA3
10	gain	NEIL1
10	gain	SLC2A5
10	gain	NGF
10	gain	LEMD2
10	gain	THG1L
10	gain	ADA
10	gain	SEC22C
10	gain	SEPTIN2
10	gain	SLC13A5
10	gain	SCNN1B
10	gain	UROC1
10	gain	SIRT4
10	gain	ENKUR
10	gain	SHQ1
10	gain	CYP20A1
10	gain	PIGH
10	gain	MMAA
10	gain	OPNVA
10	gain	PRKAA2
10	gain	EPGN
10	gain	NUP54
10	gain	TMEM179
10	gain	ERO1A
10	gain	ZC2HC1B
10	gain	NUDT5
10	gain	NPC1
10	gain	OSTM1
10	gain	NSUN3
10	gain	RAB20
10	gain	TGDS
10	gain	HK3
10	gain	KIF11
10	gain	AQP11
10	gain	B3GNT5
10	gain	AGTR1
10	gain	AMY2A
10	gain	SYDE2
10	gain	ENDOU
10	gain	NEMP2
10	gain	GPR37
10	gain	FBXO30
10	gain	DERL2
10	gain	CCDC14
10	gain	RNF115
10	gain	RNF4
10	gain	ENSGALG00000001951
10	gain	ENSGALG00000003500
10	gain	ENSGALG00000006840
10	gain	ENSGALG00000010203
10	gain	ENSGALG00000010385
10	gain	ENSGALG00000013912
10	gain	ENSGALG00000021092
10	gain	ENSGALG00000032319
10	gain	ENSGALG00000037816
10	gain	ENSGALG00000045036
10	gain	ENSGALG00000048626
10	gain	ENSGALG00000048633
10	gain	ENSGALG00000049083
10	gain	ENSGALG00000049190
10	gain	ENSGALG00000049385
10	gain	ENSGALG00000049578
10	gain	ENSGALG00000049838
10	gain	ENSGALG00000049862
10	gain	ENSGALG00000050157
10	gain	ENSGALG00000050210
10	gain	ENSGALG00000050226
10	gain	ENSGALG00000051829
10	gain	ENSGALG00000052930
10	gain	TMPRSS9
10	gain	SLC9A5
10	gain	RHO
10	gain	NWD1
10	gain	FBXL8
10	gain	TECPR1
10	gain	WASF2
10	gain	TRIM59
10	gain	PTGS2
10	gain	KANSL2
10	gain	RBMX2
10	gain	ENSGALG00000023083
10	gain	ENSGALG00000036286
10	gain	ENSGALG00000048814
10	gain	ENSGALG00000051644
10	gain	UTP4
10	gain	CYP27C1
10	gain	ATP10D
10	gain	PAQR8
10	gain	UBXN10
10	gain	POLR2M
10	gain	FOXJ1
10	gain	BCDIN3D
10	gain	BG8
10	gain	ENSGALG00000002638
10	gain	ENSGALG00000002892
10	gain	ENSGALG00000047414
10	gain	ENSGALG00000047878
10	gain	ENSGALG00000052497
10	gain	LINGO3
10	gain	CASP8
10	gain	ABCG8
10	gain	SETDB2
10	gain	HTRA3
10	gain	ALKBH3
10	gain	FAAP100
10	gain	RIPK2
10	gain	NPHP4
10	gain	LHX2
10	gain	APBB3
10	gain	TRNAU1AP
10	gain	SLC35E2B
10	gain	PDIK1L
10	gain	OGFOD3
10	gain	TTI2
10	gain	CAAP1
10	gain	TEK
10	gain	MOB3B
10	gain	SLC25A24
10	gain	NR5A2
10	gain	PTPRC
10	gain	C3orf18
10	gain	DCUN1D3
10	gain	PUS1
10	gain	PCDH12
10	gain	ARAP3
10	gain	FAM149B1
10	gain	PCDH15
10	gain	SIRT1
10	gain	GRK7
10	gain	LRRC45
10	gain	ZNF341
10	gain	MTMR12
10	gain	CRLF3
10	gain	ATAD5
10	gain	DDX55
10	gain	RILPL2
10	gain	SIMC1
10	gain	VWC2L
10	gain	POLG2
10	gain	ZNF511
10	gain	NADK2
10	gain	OGFOD2
10	gain	BNIP2
10	gain	DAB2
10	gain	LRRC38
10	gain	LIPC
10	gain	NEDD4
10	gain	ZNF507
10	gain	DPY19L3
10	gain	ANKRD27
10	gain	EDEM3
10	gain	ZNF608
10	gain	PTPDC1
10	gain	AP1S3
10	gain	RNFT1
10	gain	LRRC39
10	gain	TRMT13
10	gain	SASS6
10	gain	OVCH2
10	gain	CDH8
10	gain	MFSD14A
10	gain	SLC35A3
10	gain	CABLES2
10	gain	PPIC
10	gain	FRRS1
10	gain	PALMD
10	gain	HELLS
10	gain	WSB1
10	gain	ALOX5
10	gain	DIPK1A
10	gain	LRRC8C
10	gain	KYAT3
10	gain	MTHFS
10	gain	PDE6C
10	gain	TRMT12
10	gain	ODF2L
10	gain	MELTF
10	gain	POF1B
10	gain	MOSMO
10	gain	WDR6
10	gain	ENDOV
10	gain	C12orf43
10	gain	EEF2K
10	gain	METTL9
10	gain	CCNY
10	gain	EPC1
10	gain	IL1RAP
10	gain	TMLHE
10	gain	DOK5
10	gain	PRR5L
10	gain	FDXACB1
10	gain	SFXN2
10	gain	KCTD18
10	gain	FBXO18
10	gain	TRIM36
10	gain	SLC26A5
10	gain	ORC2
10	gain	IL5RA
10	gain	SUMF1
10	gain	STRADB
10	gain	GNAI1
10	gain	GAB3
10	gain	GINS1
10	gain	POT1
10	gain	LAMP3
10	gain	GPAM
10	gain	THAP10
10	gain	PIKFYVE
10	gain	TTC14
10	gain	DCLRE1A
10	gain	GNB4
10	gain	ITPKB
10	gain	SNAP23
10	gain	NCEH1
10	gain	PHC3
10	gain	LRRC34
10	gain	EXD2
10	gain	THBS1
10	gain	ANGEL2
10	gain	FASTKD1
10	gain	INTS7
10	gain	HELB
10	gain	DYRK2
10	gain	BICRAL
10	gain	COCH
10	gain	OTUD4
10	gain	SLC3A1
10	gain	PREPL
10	gain	LRFN2
10	gain	MOCS1
10	gain	PAX9
10	gain	ABCD4
10	gain	NGB
10	gain	TCTN3
10	gain	SGMS2
10	gain	ARHGEF38
10	gain	PRIMPOL
10	gain	CASP3
10	gain	C8A
10	gain	C8B
10	gain	OMA1
10	gain	MYSM1
10	gain	HOOK1
10	gain	G6PC2
10	gain	KLHL8
10	gain	CCDC85C
10	gain	ERMARD
10	gain	THBS2
10	gain	FAM175A
10	gain	GLB1L
10	gain	ANKZF1
10	gain	CYP2J21
10	gain	CMTM6
10	gain	SIVA1
10	gain	IQCB1
10	gain	WDR89
10	gain	ANKRD50
10	gain	FGF2
10	gain	SEC24D
10	gain	LMLN
10	gain	CEP70
10	gain	STEAP3
10	gain	KIF18A
10	gain	SOX10
10	gain	CDKL1
10	gain	GINM1
10	gain	SPOPL
10	gain	ARHGAP15
10	gain	CKAP4
10	gain	prl
10	gain	E2F3
10	gain	RNF182
10	gain	RIOK1
10	gain	DENND11
10	gain	ZCCHC2
10	gain	C5orf22
10	gain	ETV6
10	gain	FAM105A
10	gain	TERT
10	gain	ANKS6
10	gain	EOGT
10	gain	CCDC82
10	gain	MTNR1A
10	gain	LRRC2
10	gain	ZNF236
10	gain	EDRF1
10	gain	SOCS6
10	gain	SERAC1
10	gain	RTTN
10	gain	CD226
10	gain	PLAGL1
10	gain	HECA
10	gain	CEP76
10	gain	CHIC2
10	gain	VNN1
10	gain	SLAIN2
10	gain	KIAA0930
10	gain	PHC1
10	gain	NSUN7
10	gain	RELL1
10	gain	NWD2
10	gain	CD38
10	gain	BMF
10	gain	TNKS2
10	gain	ERAP1
10	gain	LMNB1
10	gain	METTL4
10	gain	ZNF131
10	gain	PARP8
10	gain	HEXB
10	gain	KPNA5
10	gain	POPDC2
10	gain	ZBTB49
10	gain	GLDC
10	gain	SLC22A16
10	gain	WASF1
10	gain	IMPACT
10	gain	MAMDC2
10	gain	DRD3
10	gain	TAF4B
10	gain	ZDHHC23
10	gain	TMC1
10	gain	CEP78
10	gain	GIN1
10	gain	BEND3
10	gain	PLAG1
10	gain	PROS1
10	gain	ARL13B
10	gain	MPZL1
10	gain	ILDR2
10	gain	CD80
10	gain	ACP6
10	gain	FAXC
10	gain	POU1F1
10	gain	VGLL3
10	gain	ACOX3
10	gain	TRMT44
10	gain	PM20D2
10	gain	RWDD2B
10	gain	COL9A1
10	gain	SMOX
10	gain	CHAF1B
10	gain	LCA5L
10	gain	CYBB
10	gain	ALKAL2
10	gain	GEN1
10	gain	TXLNG
10	gain	ZRSR2
10	gain	P2RY8
10	gain	JADE3
10	gain	LONRF2
10	gain	RNF149
10	gain	TGFBRAP1
10	gain	SLC5A7
10	gain	COL4A2
10	gain	POGLUT2
10	gain	METTL21C
10	gain	DZIP1
10	gain	GPC6
10	gain	EDNRB
10	gain	SLAIN1
10	gain	DIS3
10	gain	ELF1
10	gain	RNF6
10	gain	CD9
10	gain	SPDYA
10	gain	ALG8
10	gain	CLDN10
10	gain	CCDC102B
10	gain	VASH2
10	gain	SLC35C2
10	gain	SLC7A9
10	gain	PLA2G10
10	gain	PANX3
10	gain	WDR18
10	gain	SMYD5
10	gain	FRRS1L
10	gain	NABP1
10	gain	ARRDC3
10	gain	PDLIM7
10	gain	TCF15
10	gain	C12orf75
10	gain	BG1
10	gain	KLF13
10	gain	NXNL2
10	gain	RNF146
10	gain	NINJ1
10	gain	NTS
10	gain	SCEL
10	gain	PURG
10	gain	RASSF9
10	gain	TTLL4
10	gain	DUSP16
10	gain	CLK1
10	gain	CLK2
10	gain	ACVR1B
10	gain	NME8
10	gain	CNEP1R1
10	gain	GPLD1
10	gain	LURAP1L
10	gain	KRT18
10	gain	WISP1
10	gain	ELMO3
10	gain	TBC1D31
10	gain	KRT6A
10	gain	DNAJC5B
10	gain	STAT2
10	gain	TRABD
10	gain	AR
10	gain	TRIM67
10	gain	MKS1
10	gain	NEMP1
10	gain	SPRYD3
10	gain	NEDD1
10	gain	TMEM68
10	gain	TARP
10	gain	FUS
10	gain	CEBPG
10	gain	HPS5
10	gain	KRT5
10	gain	CDK2
10	gain	RNF41
10	gain	MEX3B
10	gain	ZMYND12
10	gain	ZNF740
10	gain	EAF1
10	gain	HIC2
10	gain	RAVER2
10	gain	ITPRIPL2
10	gain	TMEM220
10	gain	ZNF800
10	gain	L3MBTL3
10	gain	CRTAP
10	gain	FAAP24
10	gain	PLEKHA1
10	gain	TOGARAM1
10	gain	KRT7
10	gain	SMPD3
10	gain	SLC45A4
10	gain	ALB
10	gain	NCKAP1L
10	gain	ONECUT2
10	gain	JPH1
10	gain	CSAD
10	gain	ACAD11
10	gain	GNA13
10	gain	DFFB
10	gain	ZCCHC4
10	gain	TTC31
10	gain	COL4A1
10	gain	GDF11
10	gain	HSF1
10	gain	CBX6
10	gain	ZFHX4
10	gain	ADMP
10	gain	LMBR1L
10	gain	RBP1
10	gain	DGKA
10	gain	SEMA3E
10	gain	ZBTB14
10	gain	COQ10B
10	gain	CCNF
10	gain	CARMIL3
10	gain	DONSON
10	gain	RBMS2
10	gain	E2F5
10	gain	PDE1B
10	gain	PAX1
10	gain	NBEAL2
10	gain	MLH1
10	gain	SERPIND1
10	gain	SLA
10	gain	ZC3H12B
10	gain	AKAP8
10	gain	CNGA3
10	gain	PIGV
10	gain	MAPK11
10	gain	TWIST3
10	gain	MAVS
10	gain	CDCP1
10	gain	AP5Z1
10	gain	TFEC
10	gain	CFD
10	gain	P3H2
10	gain	SAMSN1
10	gain	AGO2
10	gain	METTL24
10	gain	NFYB
10	gain	TP53INP1
10	gain	DCP1A
10	gain	ITGA4
10	gain	DUSP7
10	gain	KLB
10	gain	ADPRM
10	gain	GLP2R
10	gain	ESPL1
10	gain	POMT2
10	gain	NID1
10	gain	GLI1
10	gain	TEX9
10	gain	DSEL
10	gain	PKDCC
10	gain	CEP85
10	gain	TRMT9B
10	gain	WDR17
10	gain	NPNT
10	gain	OLAH
10	gain	GPR82
10	gain	POLG
10	gain	GPR19
10	gain	CFAP97D1
10	gain	PMVK
10	gain	DRAP1
10	gain	SHARPIN
10	gain	TRPT1
10	gain	DCP1B
10	gain	TNFRSF4
10	gain	EVI5L
10	gain	EXTL2
10	gain	NHLRC3
10	gain	CYB5R4
10	gain	TMEM82
10	gain	OVST
10	gain	SIPA1
10	gain	TRIQK
10	gain	SLC13A3
10	gain	ENSGALG00000000584
10	gain	ENSGALG00000000830
10	gain	ENSGALG00000001051
10	gain	ENSGALG00000001620
10	gain	ENSGALG00000001701
10	gain	ENSGALG00000001912
10	gain	ENSGALG00000003025
10	gain	ENSGALG00000003378
10	gain	ENSGALG00000005020
10	gain	ENSGALG00000005076
10	gain	ENSGALG00000005156
10	gain	ENSGALG00000005257
10	gain	ENSGALG00000005685
10	gain	ENSGALG00000005778
10	gain	ENSGALG00000006137
10	gain	ENSGALG00000006423
10	gain	ENSGALG00000007030
10	gain	ENSGALG00000007070
10	gain	ENSGALG00000007564
10	gain	ENSGALG00000007596
10	gain	ENSGALG00000008910
10	gain	ENSGALG00000010030
10	gain	ENSGALG00000010170
10	gain	ENSGALG00000010457
10	gain	ENSGALG00000010803
10	gain	ENSGALG00000010979
10	gain	ENSGALG00000011930
10	gain	ENSGALG00000012103
10	gain	ENSGALG00000012207
10	gain	ENSGALG00000012382
10	gain	ENSGALG00000013437
10	gain	ENSGALG00000013625
10	gain	ENSGALG00000014347
10	gain	ENSGALG00000014650
10	gain	ENSGALG00000014960
10	gain	ENSGALG00000015026
10	gain	ENSGALG00000015032
10	gain	ENSGALG00000015183
10	gain	ENSGALG00000015345
10	gain	ENSGALG00000015435
10	gain	ENSGALG00000015577
10	gain	ENSGALG00000015705
10	gain	ENSGALG00000016196
10	gain	ENSGALG00000016285
10	gain	ENSGALG00000017071
10	gain	ENSGALG00000017072
10	gain	ENSGALG00000017220
10	gain	ENSGALG00000017276
10	gain	ENSGALG00000017334
10	gain	ENSGALG00000017376
10	gain	ENSGALG00000020253
10	gain	ENSGALG00000020869
10	gain	ENSGALG00000021855
10	gain	ENSGALG00000027159
10	gain	ENSGALG00000027716
10	gain	ENSGALG00000028207
10	gain	ENSGALG00000030099
10	gain	ENSGALG00000030382
10	gain	ENSGALG00000030707
10	gain	ENSGALG00000031341
10	gain	ENSGALG00000031594
10	gain	ENSGALG00000031648
10	gain	ENSGALG00000031713
10	gain	ENSGALG00000032428
10	gain	ENSGALG00000032799
10	gain	ENSGALG00000033303
10	gain	ENSGALG00000033619
10	gain	ENSGALG00000033647
10	gain	ENSGALG00000033769
10	gain	ENSGALG00000034397
10	gain	ENSGALG00000034586
10	gain	ENSGALG00000035365
10	gain	ENSGALG00000035769
10	gain	ENSGALG00000036447
10	gain	ENSGALG00000037435
10	gain	ENSGALG00000037611
10	gain	ENSGALG00000037826
10	gain	ENSGALG00000037946
10	gain	ENSGALG00000038064
10	gain	ENSGALG00000038432
10	gain	ENSGALG00000038551
10	gain	ENSGALG00000038579
10	gain	ENSGALG00000038752
10	gain	ENSGALG00000039177
10	gain	ENSGALG00000039509
10	gain	ENSGALG00000040120
10	gain	ENSGALG00000040208
10	gain	ENSGALG00000040433
10	gain	ENSGALG00000040489
10	gain	ENSGALG00000040808
10	gain	ENSGALG00000040949
10	gain	ENSGALG00000041054
10	gain	ENSGALG00000041372
10	gain	ENSGALG00000041514
10	gain	ENSGALG00000042151
10	gain	ENSGALG00000042485
10	gain	ENSGALG00000043689
10	gain	ENSGALG00000043903
10	gain	ENSGALG00000043916
10	gain	ENSGALG00000044069
10	gain	ENSGALG00000044599
10	gain	ENSGALG00000044816
10	gain	ENSGALG00000044866
10	gain	ENSGALG00000045168
10	gain	ENSGALG00000046049
10	gain	ENSGALG00000046379
10	gain	ENSGALG00000046487
10	gain	ENSGALG00000046548
10	gain	ENSGALG00000046649
10	gain	ENSGALG00000046650
10	gain	ENSGALG00000046652
10	gain	ENSGALG00000046731
10	gain	ENSGALG00000046955
10	gain	ENSGALG00000046960
10	gain	ENSGALG00000047031
10	gain	ENSGALG00000047072
10	gain	ENSGALG00000047132
10	gain	ENSGALG00000047143
10	gain	ENSGALG00000047223
10	gain	ENSGALG00000047412
10	gain	ENSGALG00000047437
10	gain	ENSGALG00000047545
10	gain	ENSGALG00000047622
10	gain	ENSGALG00000047627
10	gain	ENSGALG00000047632
10	gain	ENSGALG00000047639
10	gain	ENSGALG00000047664
10	gain	ENSGALG00000047797
10	gain	ENSGALG00000048020
10	gain	ENSGALG00000048190
10	gain	ENSGALG00000048216
10	gain	ENSGALG00000048401
10	gain	ENSGALG00000048460
10	gain	ENSGALG00000048496
10	gain	ENSGALG00000048616
10	gain	ENSGALG00000049096
10	gain	ENSGALG00000049122
10	gain	ENSGALG00000049208
10	gain	ENSGALG00000049232
10	gain	ENSGALG00000049282
10	gain	ENSGALG00000049356
10	gain	ENSGALG00000049484
10	gain	ENSGALG00000049497
10	gain	ENSGALG00000049587
10	gain	ENSGALG00000049672
10	gain	ENSGALG00000049884
10	gain	ENSGALG00000050400
10	gain	ENSGALG00000050442
10	gain	ENSGALG00000050596
10	gain	ENSGALG00000050608
10	gain	ENSGALG00000050631
10	gain	ENSGALG00000050720
10	gain	ENSGALG00000051043
10	gain	ENSGALG00000051184
10	gain	ENSGALG00000051209
10	gain	ENSGALG00000051290
10	gain	ENSGALG00000051334
10	gain	ENSGALG00000051339
10	gain	ENSGALG00000051458
10	gain	ENSGALG00000051461
10	gain	ENSGALG00000051546
10	gain	ENSGALG00000051651
10	gain	ENSGALG00000051652
10	gain	ENSGALG00000051660
10	gain	ENSGALG00000051677
10	gain	ENSGALG00000051730
10	gain	ENSGALG00000052075
10	gain	ENSGALG00000052089
10	gain	ENSGALG00000052168
10	gain	ENSGALG00000052240
10	gain	ENSGALG00000052328
10	gain	ENSGALG00000052399
10	gain	ENSGALG00000052511
10	gain	ENSGALG00000052684
10	gain	ENSGALG00000052739
10	gain	ENSGALG00000052786
10	gain	ENSGALG00000052834
10	gain	ENSGALG00000052894
10	gain	ENSGALG00000052945
10	gain	ENSGALG00000052986
10	gain	ENSGALG00000053035
10	gain	ENSGALG00000053107
10	gain	ENSGALG00000053196
10	gain	ENSGALG00000053198
10	gain	ENSGALG00000053244
10	gain	ENSGALG00000053335
10	gain	ENSGALG00000053721
10	gain	ENSGALG00000054059
10	gain	ENSGALG00000054125
10	gain	ENSGALG00000054163
10	gain	ENSGALG00000054198
10	gain	ENSGALG00000054272
10	gain	ENSGALG00000054322
10	gain	ENSGALG00000054496
10	gain	ENSGALG00000054650
10	gain	ENSGALG00000054900
10	gain	ENSGALG00000055022
10	gain	ENSGALG00000055069
10	gain	ARHGAP44
10	gain	GHDC
10	gain	S1PR1
10	gain	CCNJ
10	gain	ELOVL1
10	gain	CDH9
10	gain	IKBKE
10	gain	DOK7
10	gain	FAM76B
10	gain	FDXR
10	gain	P4HA3
10	gain	ENSGALG00000034806
10	gain	ENSGALG00000046766
10	gain	ENSGALG00000053140
10	gain	CAMK1G
10	gain	GDNF
10	gain	PABPC4
10	gain	IL16
10	gain	ANKRD40
10	gain	NPY2R
10	gain	CTSO
10	gain	RGS10
10	gain	FOXP2
10	gain	SLC25A4
10	gain	MYLK4
10	gain	EZR
10	gain	PARVG
10	gain	ELOVL7
10	gain	ANKDD1B
10	gain	LRATD1
10	gain	EGFL6
10	gain	RGS20
10	gain	FGF23
10	gain	ETAA1
10	gain	FTL
10	gain	SFRP4
10	gain	PIAS3
10	gain	MTMR11
10	gain	FRMD4B
10	gain	MSL2
10	gain	FAM184B
10	gain	SH2D5
10	gain	ENSGALG00000007127
10	gain	ENSGALG00000015059
10	gain	ENSGALG00000022976
10	gain	ENSGALG00000032036
10	gain	ENSGALG00000052593
10	gain	ENSGALG00000054032
10	gain	ENSGALG00000054231
10	gain	MMP23B
10	gain	VAT1
10	gain	CCNE1
10	gain	FAM174B
10	gain	SIRT7
10	gain	IGDCC4
10	gain	MASTL
10	gain	SPAM1
10	gain	DBX2
10	gain	ABCG5
10	gain	PTPRB
10	gain	CCDC167
10	gain	MFSD8
10	gain	LRRC41
10	gain	PRRG4
10	gain	KYNU
10	gain	FGFBP2
10	gain	FHL2
10	gain	RASL11A
10	gain	SERINC2
10	gain	TAF1C
10	gain	LEF1
10	gain	MYBL1
10	gain	SPIN1W
10	gain	SUSD5
10	gain	ZBTB26
10	gain	PYM1
10	gain	ENSGALG00000012319
10	gain	ENSGALG00000016508
10	gain	METTL23
10	gain	CXCL14
10	gain	NCAPG2
10	gain	MPP5
10	gain	CYB561D2
10	gain	BTG2
10	gain	CDC25B
10	gain	ENSGALG00000008752
10	gain	ENSGALG00000019934
10	gain	ENSGALG00000045569
10	gain	ENSGALG00000050497
10	gain	DNAJB5
10	gain	CLP1
10	gain	GYPC
10	gain	MMP28
10	gain	DHTKD1
10	gain	POFUT1
10	gain	SPAG6
10	gain	TRAF6
10	gain	SLC26A4
10	gain	MSH2
10	gain	STEAP2
10	gain	DACT2
10	gain	CENPC
10	gain	SETD4
10	gain	BORA
10	gain	C1H11ORF70
10	gain	PDCD7
10	gain	ZNF362
10	gain	ODF1
10	gain	CDCA7L
10	gain	PIK3C2B
10	gain	TFEB
10	gain	GNPDA1
10	gain	LYN
10	gain	HNRNPUL1
10	gain	TMEM251
10	gain	ENSGALG00000033254
10	gain	ENSGALG00000033381
10	gain	ENSGALG00000036263
10	gain	ENSGALG00000048343
10	gain	ENSGALG00000050975
10	gain	ENSGALG00000051132
10	gain	ZBTB41
10	gain	ENSGALG00000052601
10	gain	ENSGALG00000053965
10	gain	AQP3
10	gain	ANGPTL1
10	gain	STON2
10	gain	KCNA4
10	gain	SLC5A12
10	gain	NEK3
10	gain	SPTSSA
10	gain	SEMA3C
10	gain	ENSGALG00000026884
10	gain	ENSGALG00000035761
10	gain	ENSGALG00000046030
10	gain	LRRTM3
10	gain	ESYT3
10	gain	SMAD9
10	gain	ADAMTSL2
10	gain	PLPP3
10	gain	NUP43
10	gain	NEPRO
10	gain	ST6GAL2
10	gain	DYNLT1
10	gain	TIMELESS
10	gain	PEX11G
10	gain	SLC27A3
10	gain	DCAF15
10	gain	MGAT1
10	gain	ENSGALG00000034701
10	gain	ENSGALG00000039590
10	gain	ENSGALG00000053114
10	gain	ENSGALG00000053332
10	gain	TOM1L1
10	gain	TBCCD1
10	gain	SPATA4
10	gain	SPC25
10	gain	CCSAP
10	gain	ADCK2
10	gain	RAD52
10	gain	CYP2J23
10	gain	ENSGALG00000006104
10	gain	ENSGALG00000008326
10	gain	ENSGALG00000009504
10	gain	ENSGALG00000037186
10	gain	ENSGALG00000042708
10	gain	ENSGALG00000044224
10	gain	ENSGALG00000053846
10	gain	ACTR5
10	gain	FEM1C
10	gain	NENF
10	gain	DCLRE1C
10	gain	ITFG2
10	gain	TRIM45
10	gain	CEP57L1
10	gain	TMPRSS15
10	gain	AMOTL1
10	gain	PHF13
10	gain	ST3GAL4
10	gain	MPZ
10	gain	PDC
10	gain	TRIP13
10	gain	ENSGALG00000031996
10	gain	ENSGALG00000050222
10	gain	ENSGALG00000054776
10	gain	FN1
10	gain	GPR34
10	gain	ENSGALG00000007110
10	gain	CIB3
10	gain	CERCAM
10	gain	PIK3AP1
10	gain	HPGD
10	gain	LRRC3B
10	gain	NTN4
10	gain	SERPINB6
10	gain	SIM1
10	gain	BLK
10	gain	ADTRP
10	gain	WNT7B
10	gain	EHD2
10	gain	APCDD1
10	gain	CYP2J22
10	gain	ENSGALG00000050269
10	gain	ENSGALG00000053565
10	gain	SH3BP4
10	gain	SLTM
10	gain	GIPC2
10	gain	FBXO5
10	gain	PLPPR4
10	gain	ENSGALG00000013101
10	gain	ENSGALG00000025996
10	gain	ENSGALG00000048153
10	gain	CCNB1
10	gain	SLC6A7
10	gain	ZRANB3
10	gain	FXYD6
10	gain	ENSGALG00000047879
10	gain	ENSGALG00000052652
10	gain	ASB1
10	gain	CPSF4
10	gain	VSIG1
10	gain	POGLUT3
10	gain	ENSGALG00000035362
10	gain	DUSP13
10	gain	NOM1
10	gain	AATK
10	gain	IQCG
10	gain	MEST
10	gain	CIB4
10	gain	HGSNAT
10	gain	MCM9
10	gain	NUDT12
10	gain	DCUN1D5
10	gain	C1orf198
10	gain	SLC46A2
10	gain	GNB3
10	gain	NOD1
10	gain	EIF4EBP2
10	gain	KIT
10	gain	CFAP100
10	gain	FYB2
10	gain	SMPDL3A
10	gain	CACNG7
10	gain	ENSGALG00000041973
10	gain	ENSGALG00000043606
10	gain	ENSGALG00000044313
10	gain	ENSGALG00000047988
10	gain	GPR88
10	gain	RBP4A
10	gain	MMRN1
10	gain	FGF6
10	gain	TMEM38B
10	gain	ENSGALG00000038671
10	gain	ENSGALG00000039023
10	gain	ENSGALG00000041435
10	gain	ENSGALG00000042611
10	gain	ENSGALG00000048102
10	gain	ENSGALG00000053682
10	gain	ENSGALG00000054086
10	gain	SGSM1
10	gain	NSL1
10	gain	INTS12
10	gain	CDADC1
10	gain	OTOP1
10	gain	TYK2
10	gain	GPR171
10	gain	CA5B
10	gain	LCORL
10	gain	ZBTB20
10	gain	GLYCTK
10	gain	ENSGALG00000047532
10	gain	ENSGALG00000054173
10	gain	RAP2C
10	gain	COLQ
10	gain	RFTN1
10	gain	TNIP3
10	gain	CHST9
10	gain	KLF9
10	gain	ENSGALG00000016570
10	gain	DTYMK
10	gain	ADCY3
10	gain	DNASE2B
10	gain	MIIP
10	gain	TICRR
10	gain	LYSMD3
10	gain	ENSGALG00000048337
10	gain	ENSGALG00000054145
10	gain	KLHDC8B
10	gain	SUPT7L
10	gain	PECR
10	gain	PLCXD2
10	gain	CEP57
10	gain	PTP4A3
10	gain	ENSGALG00000053276
10	gain	ENSGALG00000053383
10	gain	BCAS1
10	gain	KIF27
10	gain	SERPINE3
10	gain	GABRE
10	gain	TRAPPC3L
10	gain	NECAB1
10	gain	C14orf132
10	gain	IQCJ
10	gain	ENSGALG00000015017
10	gain	ENSGALG00000030487
10	gain	HBP1
10	gain	SRD5A2
10	gain	IYD
10	gain	FBLN1
10	gain	PANX1
10	gain	ISG20L2
10	gain	ENSGALG00000013247
10	gain	ENSGALG00000031789
10	gain	ENSGALG00000050730
10	gain	EDEM1
10	gain	ENSGALG00000050568
10	gain	CYP2D6
10	gain	GABRR2
10	gain	RIPK4
10	gain	TCF24
10	gain	ENSGALG00000053867
10	gain	MRAP2
10	gain	SLITRK6
10	gain	EPX
10	gain	ENSGALG00000048306
10	gain	FBXO32
10	gain	ENSGALG00000049505
10	gain	ENSGALG00000053275
10	loss	NA
11	gain	HOXB4
11	gain	NSUN5
11	gain	NCF1C
11	gain	PGAM5
11	gain	RO60
11	gain	BARD1
11	gain	P2RX4
11	gain	BCORL1
11	gain	FAT2
11	gain	CELA2A
11	gain	MDH1B
11	gain	RPP38
11	gain	CAPN14
11	gain	CSGALNACT1
11	gain	SPRTN
11	gain	ESR2
11	gain	SYTL3
11	gain	ALDH1A1
11	gain	NR2E1
11	gain	THAP1
11	gain	HGFAC
11	gain	SIM2
11	gain	KCNJ15
11	gain	KL
11	gain	ANKRD42
11	gain	CDC42EP4
11	gain	PCIF1
11	gain	TNFAIP8
11	gain	GRPR
11	gain	SLC4A5
11	gain	VSX2
11	gain	HYI
11	gain	ASAP3
11	gain	DNMT1
11	gain	RGMA
11	gain	WIF1
11	gain	RPUSD2
11	gain	TRAF2
11	gain	IGFBP1
11	gain	QPRT
11	gain	C4orf46
11	gain	ENSGALG00000009006
11	gain	ENSGALG00000009355
11	gain	ENSGALG00000016499
11	gain	ENSGALG00000030096
11	gain	ENSGALG00000031186
11	gain	ENSGALG00000031659
11	gain	ENSGALG00000034083
11	gain	ENSGALG00000036140
11	gain	ENSGALG00000041909
11	gain	ENSGALG00000044632
11	gain	ENSGALG00000047904
11	gain	ENSGALG00000048246
11	gain	ENSGALG00000048671
11	gain	ENSGALG00000049483
11	gain	ENSGALG00000049504
11	gain	ENSGALG00000052298
11	gain	ENSGALG00000054227
11	gain	ENSGALG00000054624
11	gain	ANKFY1
11	gain	DISP3
11	gain	CRYGN
11	gain	ACOX2
11	gain	PAQR3
11	gain	NAB1
11	gain	ENSGALG00000002395
11	gain	ENSGALG00000050047
11	gain	GABRP
11	gain	SMCO4
11	gain	IRF2BPL
11	gain	CNR1
11	gain	ENSGALG00000043190
11	gain	PPL
11	gain	SETD6
11	gain	NCDN
11	gain	ADAP2
11	gain	CALR3
11	gain	GPR174
11	gain	GHRHR
11	gain	SDR42E1
11	gain	SAXO2
11	gain	LAMB2
11	gain	METTL21A
11	gain	DYTN
11	gain	CAPN3
11	gain	PLD1
11	gain	SYNDIG1L
11	gain	OPN3
11	gain	TWISTNB
11	gain	GNG4
11	gain	SERPINH1
11	gain	SGO1
11	gain	CENPM
11	gain	SAV1
11	gain	DRAM1
11	gain	CECR1
11	gain	FBXO15
11	gain	PDGFRA
11	gain	ASF1A
11	gain	CLUL1
11	gain	RFX6
11	gain	PLA1A
11	gain	MAB21L3
11	gain	LIX1
11	gain	ZBTB11
11	gain	THNSL2
11	gain	GYG2
11	gain	POSTN
11	gain	MMP1
11	gain	MMP10
11	gain	BET1
11	gain	TMEM17
11	gain	MDFIC
11	gain	GPR139
11	gain	CSPG5
11	gain	TRMT2B
11	gain	EVX1
11	gain	SESN2
11	gain	NCF4
11	gain	GPAT2
11	gain	NOLC1
11	gain	KCNK3
11	gain	FAM81B
11	gain	IL13RA1
11	gain	PLCD3
11	gain	NANP
11	gain	ATF3
11	gain	TMEM80
11	gain	ENSGALG00000001049
11	gain	ENSGALG00000005298
11	gain	ENSGALG00000005303
11	gain	ENSGALG00000024379
11	gain	ENSGALG00000026294
11	gain	ENSGALG00000026297
11	gain	ENSGALG00000030121
11	gain	ENSGALG00000032501
11	gain	ENSGALG00000037671
11	gain	ENSGALG00000040182
11	gain	ENSGALG00000042275
11	gain	ENSGALG00000044418
11	gain	ENSGALG00000045540
11	gain	ENSGALG00000045796
11	gain	ENSGALG00000047543
11	gain	ENSGALG00000048501
11	gain	ENSGALG00000048721
11	gain	ENSGALG00000049308
11	gain	ENSGALG00000049532
11	gain	ENSGALG00000050112
11	gain	ENSGALG00000051500
11	gain	ENSGALG00000051739
11	gain	ENSGALG00000051790
11	gain	ENSGALG00000052210
11	gain	ENSGALG00000052391
11	gain	ENSGALG00000053547
11	gain	ENSGALG00000054636
11	gain	ARHGAP40
11	gain	CYSLTR1
11	gain	FOXN4
11	gain	WEE1
11	gain	SLC39A12
11	gain	BEST3
11	gain	LRR1
11	gain	SLC39A8
11	gain	CNDP1
11	gain	IGSF5
11	gain	TMEM123
11	gain	PCGF1
11	gain	LRRC58
11	gain	DPYS
11	gain	HIP1
11	gain	HDAC10
11	gain	MIP
11	gain	LRRC6
11	gain	ENSGALG00000003713
11	gain	ENSGALG00000033570
11	gain	ENSGALG00000052242
11	gain	NECAP2
11	gain	GRAMD2B
11	gain	BATF
11	gain	TFCP2L1
11	gain	C1QTNF2
11	gain	HAS2
11	gain	SGPP1
11	gain	GOLIM4
11	gain	ENSGALG00000004144
11	gain	ENSGALG00000013600
11	gain	ENSGALG00000015753
11	gain	ENSGALG00000026578
11	gain	ENSGALG00000048048
11	gain	TSPAN15
11	gain	CYP2AB1
11	gain	NT5E
11	gain	ENSGALG00000042647
11	gain	ENSGALG00000046840
11	gain	ENSGALG00000048542
11	gain	ENSGALG00000050753
11	gain	BRINP2
11	gain	KIAA1024
11	gain	CCDC61
11	gain	HYAL6
11	gain	ENGASE
11	gain	SYNPO2
11	gain	DNAAF2
11	gain	TYR
11	gain	C10orf2
11	gain	DTHD1
11	gain	CLRN2
11	gain	SMARCD2
11	gain	INPP5D
11	gain	YAP1
11	gain	ADRA1D
11	gain	GRID2IP
11	gain	OTOS
11	gain	SPACA1
11	gain	BCL2L11
11	gain	ENSGALG00000032066
11	gain	ENSGALG00000043654
11	gain	DNMBP
11	gain	TNIP2
11	gain	CENPO
11	gain	HDC
11	gain	ENSGALG00000044527
11	gain	ENSGALG00000048639
11	gain	ENSGALG00000053046
11	gain	EFCAB1
11	gain	HTR1B
11	loss	CRYBA4
11	loss	NIT1
11	loss	AJAP1
11	loss	TCTE1
11	loss	ENSGALG00000030056
11	loss	IRX2
11	loss	PDE9A
11	loss	IRX1
11	loss	GSE1
11	loss	C1QL3
11	loss	TBR1
11	loss	TPGS1
11	loss	GAD1
11	loss	NMB
11	loss	SEMA4G
11	loss	ECEL1
11	loss	ALDH1A3
11	loss	ENSGALG00000006143
12	gain	SAG
12	gain	ENSGALG00000035785
12	gain	ENSGALG00000047695
12	gain	ZIC4
12	gain	POLE3
12	gain	PDE6B
12	gain	KCNF1
12	gain	SNED1
12	gain	ENSGALG00000051082
12	gain	ING2
12	gain	ECE1
12	gain	PAX6
12	gain	DCBLD1
12	gain	ENSGALG00000013624
12	gain	ENSGALG00000032409
12	gain	ENSGALG00000054418
12	gain	HNMT
12	gain	ENSGALG00000054455
12	gain	RNF24
12	gain	ENSGALG00000023036
12	gain	ENSGALG00000052114
12	gain	GP5
12	gain	CLCA2
12	gain	ENSGALG00000033461
12	loss	CSRP1
12	loss	PLEKHJ1
12	loss	TMEM132E
12	loss	WDR24
12	loss	DAW1
12	loss	MCEE
12	loss	COL6A3
12	loss	HNF4A
12	loss	TNN
12	loss	KCTD10
12	loss	BOK
12	loss	ATP12A
12	loss	ZPR1
12	loss	YIPF5
12	loss	COPS7B
12	loss	COL1A2
12	loss	SOST
12	loss	KIF2C
12	loss	NR1H4
12	loss	SMTN
12	loss	ATG14
12	loss	MFNG
12	loss	DERA
12	loss	IKZF3
12	loss	GJA1
12	loss	ROS1
12	loss	APOV1
12	loss	PSAT1
12	loss	MIS18A
12	loss	SLC15A1
12	loss	HTR2A
12	loss	FAM43B
12	loss	AP5S1
12	loss	KCNN3
12	loss	TMEM248
12	loss	LIN28A
12	loss	DECR1
12	loss	HOXC8
12	loss	ASB8
12	loss	AQP2
12	loss	LFNG
12	loss	NAA10
12	loss	GDAP1
12	loss	FOXN1
12	loss	APBB1
12	loss	HS3ST6
12	loss	ANKRD66
12	loss	ENSGALG00000005037
12	loss	ENSGALG00000005093
12	loss	ENSGALG00000007703
12	loss	ENSGALG00000008518
12	loss	ENSGALG00000009628
12	loss	ENSGALG00000013007
12	loss	ENSGALG00000016964
12	loss	ENSGALG00000020458
12	loss	ENSGALG00000045093
12	loss	ENSGALG00000045310
12	loss	ENSGALG00000048620
12	loss	ENSGALG00000050235
12	loss	TNFRSF10B
12	loss	STC2
12	loss	CHRNA5
12	loss	TACR3
12	loss	ASPHD2
12	loss	RPUSD4
12	loss	ZNRF1
12	loss	LMO2
12	loss	UBA5
12	loss	SURF1
12	loss	ENSGALG00000050406
12	loss	KLHDC8A
12	loss	STK10
12	loss	HYKK
12	loss	SLC35E1
12	loss	CACNG5
12	loss	HTR6
12	loss	INPPL1
12	loss	SOX8
12	loss	GNG13
12	loss	HNF4beta
12	loss	TSR3
12	loss	UBALD1
12	loss	ZC3HC1
12	loss	PTPMT1
12	loss	TBX5
12	loss	EPHB3
12	loss	TMEM69
12	loss	L3HYPDH
12	loss	PARPBP
12	loss	FUT10
12	loss	EPHX2
12	loss	ATP13A4
12	loss	ZNF414
12	loss	S100A10
12	loss	NTN3
12	loss	COL2A1
12	loss	SLC25A34
12	loss	FAM83H
12	loss	PPM1M
12	loss	METTL22
12	loss	ANO8
12	loss	STK35
12	loss	STRIP1
12	loss	SHF
12	loss	CREG1
12	loss	FMO3
12	loss	PRUNE1
12	loss	PIK3R6
12	loss	ACSM5
12	loss	FCER1G
12	loss	GPR135
12	loss	SRXN1
12	loss	ENSGALG00000012847
12	loss	ENSGALG00000028666
12	loss	ENSGALG00000034591
12	loss	ENSGALG00000041442
12	loss	ENSGALG00000045947
12	loss	ENSGALG00000046479
12	loss	ENSGALG00000047323
12	loss	ENSGALG00000049780
12	loss	ENSGALG00000050937
12	loss	ENSGALG00000052056
12	loss	ENSGALG00000053574
12	loss	ENSGALG00000054023
12	loss	ADRA1B
12	loss	MAFB
12	loss	ELFN1
12	loss	TNFRSF6B
12	loss	GXYLT2
12	loss	NR0B1
12	loss	TUBB6
12	loss	SRF
12	loss	ENSGALG00000005007
12	loss	ENSGALG00000037031
12	loss	CYB5D2
12	loss	MANEAL
12	loss	TAX1BP3
12	loss	HCK
12	loss	RASEF
12	loss	TEC
12	loss	TTC32
12	loss	RGN
12	loss	ARMH1
12	loss	THOC3
12	loss	RAB37
12	loss	PRRX2
12	loss	FAM180A
12	loss	PKIG
12	loss	CBFA2T3
12	loss	ARHGAP45
12	loss	UTP3
12	loss	HOXC11
12	loss	ENSGALG00000021686
12	loss	ENSGALG00000030853
12	loss	ENSGALG00000052043
12	loss	CYGB
12	loss	KREMEN1
12	loss	ING5
12	loss	PNO1
12	loss	NUDT15
12	loss	OST4
12	loss	ENSGALG00000054304
12	loss	NUP35
12	loss	ABCA12
12	loss	HPCAL4
12	loss	SLC6A4
12	loss	RGS9BP
12	loss	SLCO2A1
12	loss	HARBI1
12	loss	TLR2B
12	loss	ITGB6
12	loss	VIP
12	loss	FBXO40
12	loss	LLGL1
12	loss	B3GNT9
12	loss	PKIB
12	loss	DTX1
12	loss	MOB3A
12	loss	TBC1D22B
12	loss	ARHGEF11
12	loss	NECTIN4
12	loss	ENSGALG00000001031
12	loss	ENSGALG00000024490
12	loss	ENSGALG00000036935
12	loss	ENSGALG00000044307
12	loss	ENSGALG00000053315
12	loss	PRDM12
12	loss	SNAP47
12	loss	CSF1R
12	loss	PARP16
12	loss	GSTO2
12	loss	FKBP14
12	loss	CANT1
12	loss	WDR55
12	loss	MTHFD2
12	loss	NAALAD2
12	loss	ENSGALG00000018819
12	loss	ENSGALG00000034772
12	loss	HHATL
12	loss	TPX2
12	loss	BIRC3
12	loss	CACTIN
12	loss	PIK3R5
12	loss	BARX2
12	loss	GFRA2
12	loss	RPP40
12	loss	AEBP1
12	loss	KIFC3
12	loss	ENSGALG00000000104
12	loss	ENSGALG00000001304
12	loss	C1R
12	loss	GPX1
12	loss	DCDC2
12	loss	RARRES2
12	loss	FAM46A
13	gain	KDF1
13	gain	ZBTB47
13	gain	TRPC6
13	gain	PAK4
13	gain	PPM1F
13	gain	ENSGALG00000010108
13	gain	ENSGALG00000033014
13	gain	ENSGALG00000046986
13	gain	ZBTB43
13	gain	HESX1
13	gain	GTPBP3
13	gain	THAP9
13	gain	B4GALT1
13	gain	GALNT12
13	gain	RAB23
13	gain	CYP2U1
13	gain	C2orf88
13	gain	ENSGALG00000047956
13	gain	PPP1R26
13	gain	MBL2
13	gain	TMEM39B
13	gain	RSAD2
13	gain	ENSGALG00000025872
13	gain	HDHD5
13	gain	CYP1B1
13	gain	TIMP3
13	gain	TMC6
13	gain	TNFAIP8L3
13	gain	STYX
13	gain	P3H4
13	gain	RIPOR1
13	gain	CTSH
13	gain	DUSP1
13	gain	NMNAT1
13	gain	ENSGALG00000009063
13	gain	ENSGALG00000050490
13	loss	SLC1A6
13	loss	PTRH2
13	loss	RAB36
13	loss	DRD2
13	loss	CCNG2
13	loss	N6AMT1
13	loss	RGS21
13	loss	BMP2
13	loss	SHISA4
13	loss	SYNJ2BP
13	loss	ALPK3
13	loss	ADGRF5
13	loss	COPZ1
13	loss	ILVBL
13	loss	ENSGALG00000027765
13	loss	ENSGALG00000044471
13	loss	ENSGALG00000054212
13	loss	MMEL1
13	loss	BDNF
13	loss	CBX1
13	loss	ENSGALG00000010722
13	loss	ENSGALG00000035017
13	loss	CYBC1
13	loss	MYL10
13	loss	TP53RK
13	loss	PES1
13	loss	SMPX
13	loss	ENG
13	loss	COL14A1
13	loss	SULF1
13	loss	ENSGALG00000053028
13	loss	CDC45
13	loss	NOTCH1
13	loss	GRM4
13	loss	GLRA1
13	loss	BET1L
13	loss	CLN6
13	loss	ITPRID2
13	loss	GATAD1
13	loss	CBY1
13	loss	INSC
13	loss	STAT4
13	loss	COA7
13	loss	ENSGALG00000013528
13	loss	ENSGALG00000042733
13	loss	ENSGALG00000043676
13	loss	ENSGALG00000048940
13	loss	ENSGALG00000054069
13	loss	ENSGALG00000054599
13	loss	CIB3
13	loss	CERCAM
13	loss	PIK3AP1
13	loss	HPGD
13	loss	LRRC3B
13	loss	NTN4
13	loss	SERPINB6
13	loss	SIM1
13	loss	BLK
13	loss	ADTRP
13	loss	WNT7B
13	loss	EHD2
13	loss	APCDD1
13	loss	CYP2J22
13	loss	ENSGALG00000050269
13	loss	ENSGALG00000053565
13	loss	CPSF4
13	loss	VSIG1
13	loss	POGLUT3
13	loss	ENSGALG00000035362
13	loss	BCAS1
13	loss	KIF27
13	loss	SERPINE3
13	loss	GABRE
13	loss	TRAPPC3L
13	loss	NECAB1
13	loss	C14orf132
13	loss	IQCJ
13	loss	ENSGALG00000015017
13	loss	ENSGALG00000030487
13	loss	PCNX4
13	loss	TYSND1
13	loss	BUB1B
13	loss	ENSGALG00000054424
13	loss	GPR161
13	loss	GJB6
13	loss	TNFRSF1B
13	loss	ENSGALG00000006272
13	loss	ENSGALG00000015822
13	loss	ENSGALG00000045817
14	gain	CRHR1
14	gain	HHATL
14	gain	TPX2
14	gain	BIRC3
14	gain	CACTIN
14	gain	PIK3R5
14	gain	BARX2
14	gain	GFRA2
14	gain	RPP40
14	gain	AEBP1
14	gain	KIFC3
14	gain	ENSGALG00000000104
14	gain	ENSGALG00000001304
14	gain	FAM3D
14	gain	ENSGALG00000001206
14	gain	DNMBP
14	gain	TNIP2
14	gain	CENPO
14	gain	HDC
14	gain	ENSGALG00000044527
14	gain	ENSGALG00000048639
14	gain	ENSGALG00000053046
14	gain	IFNGR1
14	gain	CPZ
14	gain	ENSGALG00000017493
14	gain	BAK1
14	gain	MYC
14	gain	ENSGALG00000017336
14	gain	ENSGALG00000043074
14	gain	ENSGALG00000051072
14	gain	ENSGALG00000045534
14	loss	SLC26A9
14	loss	C1orf174
14	loss	NLRC5
14	loss	PDCL
14	loss	ZBTB44
14	loss	SCAMP2
14	loss	TPPP3
14	loss	HSDL1
14	loss	UNC119
14	loss	TBC1D13
14	loss	NLE1
14	loss	TBX4
14	loss	ZDHHC4
14	loss	GORASP1
14	loss	NR2F2
14	loss	STX16
14	loss	LDB1
14	loss	IL18
14	loss	HORMAD2
14	loss	GPR50
14	loss	EFCAB14
14	loss	EPYC
14	loss	GCAT
14	loss	FAM114A1
14	loss	SMIM8
14	loss	RAB39A
14	loss	SLCO2B1
14	loss	EPHA8
14	loss	SF3A2
14	loss	PIGY
14	loss	TTYH2
14	loss	HACD4
14	loss	CBLN2
14	loss	MAFG
14	loss	MAPRE3
14	loss	VDR
14	loss	GCDH
14	loss	ARHGAP25
14	loss	ZNF622
14	loss	LHFPL5
14	loss	PLCB2
14	loss	TRIM29
14	loss	RAP2B
14	loss	DNAL4
14	loss	SEC14L5
14	loss	TCN2
14	loss	ANKRD39
14	loss	SKOR2
14	loss	ENSGALG00000006465
14	loss	ENSGALG00000015249
14	loss	ENSGALG00000027173
14	loss	ENSGALG00000030673
14	loss	ENSGALG00000038820
14	loss	ENSGALG00000040415
14	loss	ENSGALG00000044479
14	loss	GFAP
14	loss	PIP4K2B
14	loss	TNFRSF18
14	loss	MYO7B
14	loss	CERS1
14	loss	PTRF
14	loss	SLC9A3R1
14	loss	TXLNB
14	loss	LYG2
14	loss	TMEM233
14	loss	SETDB1
14	loss	ARMT1
14	loss	FLAD1
14	loss	ANAPC15
14	loss	TLDC1
14	loss	FEN1
14	loss	MCAT
14	loss	CDH17
14	loss	SP1
14	loss	RASSF1
14	loss	YBEY
14	loss	ENSGALG00000039733
14	loss	ATP8B3
14	loss	CLIC4
14	loss	UBE2J2
14	loss	GTF3C5
14	loss	VTN
14	loss	SLC13A2
14	loss	IFT20
14	loss	SLC22A18
14	loss	TRPM5
14	loss	LSP1P1
14	loss	VSTM2L
14	loss	TLX1
14	loss	CREB3L1
14	loss	CPM
14	loss	JUN
14	loss	PKP2
14	loss	FAM3B
14	loss	TMEM59L
14	loss	GLRX
14	loss	PIGBOS1
14	loss	FOXP4
14	loss	SKIV2L
14	loss	MARCKS
14	loss	DUT
14	loss	BAHCC1
14	loss	MUC6
14	loss	WDR77
14	loss	KATNAL2
14	loss	ACHE
14	loss	SHISAL2A
14	loss	ENSGALG00000005291
14	loss	ENSGALG00000016802
14	loss	ENSGALG00000027722
14	loss	ENSGALG00000048205
14	loss	ENSGALG00000053860
14	loss	ENSGALG00000054154
14	loss	ENSGALG00000054991
14	loss	METTL23
14	loss	CXCL14
14	loss	NCAPG2
14	loss	MPP5
14	loss	CYB561D2
14	loss	BTG2
14	loss	CDC25B
14	loss	ENSGALG00000008752
14	loss	ENSGALG00000019934
14	loss	ENSGALG00000045569
14	loss	ENSGALG00000050497
14	loss	MMP28
14	loss	DHTKD1
14	loss	POFUT1
14	loss	SPAG6
14	loss	TRAF6
14	loss	SLC26A4
14	loss	MSH2
14	loss	STEAP2
14	loss	DACT2
14	loss	CENPC
14	loss	SETD4
14	loss	BORA
14	loss	C1H11ORF70
14	loss	PDCD7
14	loss	ZNF362
14	loss	ODF1
14	loss	CDCA7L
14	loss	PIK3C2B
14	loss	TFEB
14	loss	GNPDA1
14	loss	LYN
14	loss	HNRNPUL1
14	loss	TMEM251
14	loss	ENSGALG00000033254
14	loss	ENSGALG00000033381
14	loss	ENSGALG00000036263
14	loss	ENSGALG00000048343
14	loss	ENSGALG00000050975
14	loss	ENSGALG00000051132
14	loss	FN1
14	loss	GPR34
14	loss	ENSGALG00000007110
14	loss	CCNB1
14	loss	SLC6A7
14	loss	ZRANB3
14	loss	FXYD6
14	loss	ENSGALG00000047879
14	loss	ENSGALG00000052652
14	loss	GFER
14	loss	CEP68
14	loss	ENSGALG00000045925
14	loss	DTYMK
14	loss	ADCY3
14	loss	DNASE2B
14	loss	MIIP
14	loss	CRKL
14	loss	TBX19
14	loss	FOXRED1
14	loss	SCO2
14	loss	DUSP23
14	loss	DPF1
14	loss	ENSGALG00000034054
14	loss	POLE3
14	loss	PDE6B
14	loss	KCNF1
14	loss	SNED1
14	loss	ENSGALG00000051082
14	loss	ANO6
14	loss	CINP
14	loss	FPGT
14	loss	MED18
14	loss	TECTA
14	loss	MUL1
14	loss	DAPP1
14	loss	RHOB
14	loss	SLC17A9
14	loss	CALR
14	loss	SNRPD2
14	loss	WBSCR22
14	loss	FLNA
14	loss	ENSGALG00000006143
14	loss	ENSGALG00000046156
15	gain	ANGPTL4
15	gain	PTCH2
15	gain	FLVCR2
15	gain	ENSGALG00000004676
15	gain	MYO1D
15	gain	BVES
15	gain	PPP1R17
15	gain	TRIM55
15	gain	TMEM88B
15	gain	AK7
15	gain	SLC2A12
15	gain	ENSGALG00000012045
15	gain	ENSGALG00000051789
15	gain	TBC1D2
15	gain	HAL
15	gain	MARCHF3
15	gain	HTR7L
15	gain	ENSGALG00000030350
15	gain	SLC16A14
15	gain	NUF2
15	gain	CENPE
15	gain	ENSGALG00000047283
15	gain	ENSGALG00000051428
15	gain	ENSGALG00000052770
15	gain	CHAC2
15	gain	LRRC42
15	gain	EAF2
15	gain	OPRM1
15	gain	RGS9
15	gain	ENSGALG00000051263
15	gain	FBP1
15	gain	ENSGALG00000042423
15	gain	ENSGALG00000015461
15	gain	ENSGALG00000031327
15	loss	UTP4
15	loss	CYP27C1
15	loss	ATP10D
15	loss	PAQR8
15	loss	UBXN10
15	loss	POLR2M
15	loss	FOXJ1
15	loss	BCDIN3D
15	loss	BG8
15	loss	ENSGALG00000002638
15	loss	ENSGALG00000002892
15	loss	ENSGALG00000047414
15	loss	ENSGALG00000047878
15	loss	ENSGALG00000052497
15	loss	NIP7
15	loss	TMEM222
15	loss	LPAR4
15	loss	HAT1
15	loss	CHRM5
15	loss	TDRD9
15	loss	EMG1
15	loss	SNAPIN
15	loss	SPATA16
15	loss	NDUFAF8
15	loss	QPCTL
15	loss	ENSGALG00000049239
15	loss	GABRA6
15	loss	CHST12
15	loss	CDK5RAP1
15	loss	GAL
15	loss	PSTK
15	loss	PLCXD1
15	loss	UBAP2L
15	loss	NCAPH
15	loss	ENSGALG00000003345
15	loss	DNAJB5
15	loss	CLP1
15	loss	GYPC
15	loss	GMPPA
15	loss	ADGRA2
15	loss	RAD1
15	loss	DNAJC28
15	loss	MON1A
15	loss	CA4
15	loss	TRIM3
15	loss	MINPP1
15	loss	AIFM2
15	loss	TERB1
15	loss	PRDM6
15	loss	FBXO31
15	loss	HMCES
15	loss	DPH7
15	loss	EHD4
15	loss	NMD3
15	loss	PLK3
15	loss	UMPS
15	loss	NIT2
15	loss	DUSP15
15	loss	BRPF1
15	loss	CPA6
15	loss	ALDH4A1
15	loss	ENSGALG00000030153
15	loss	ENSGALG00000034085
15	loss	ENSGALG00000036550
15	loss	ENSGALG00000040131
15	loss	ENSGALG00000045478
15	loss	ENSGALG00000049711
15	loss	PTCD1
15	loss	AMPD2
15	loss	GCNT2
15	loss	ENSGALG00000039186
15	loss	KLHDC8B
15	loss	SUPT7L
[truncated: 4,224 more rows]

## Sheet: H. sap.
Table S7-3. Identified gain and loss of genes for the node of human CN.
Node	Type	Gene name
10	gain	FUCA2
10	gain	ENPP4
10	gain	CYP51A1
10	gain	KRIT1
10	gain	POLDIP2
10	gain	DVL2
10	gain	REX1BD
10	gain	OSBPL7
10	gain	TMEM132A
10	gain	CX3CL1
10	gain	TBXA2R
10	gain	PIGQ
10	gain	MYLIP
10	gain	ZNF200
10	gain	MKS1
10	gain	SLC7A14
10	gain	SLC25A39
10	gain	GLT8D1
10	gain	ZNF582
10	gain	PLEKHO1
10	gain	CCDC28A
10	gain	GRN
10	gain	CENPQ
10	gain	ASTE1
10	gain	GABARAPL2
10	gain	ADAM28
10	gain	CP
10	gain	SCML1
10	gain	LMO3
10	gain	VAMP3
10	gain	UTS2
10	gain	RELT
10	gain	MRPL43
10	gain	SEC61A1
10	gain	YIPF1
10	gain	SEZ6
10	gain	SPHK2
10	gain	U2AF2
10	gain	CTSA
10	gain	NTHL1
10	gain	NDUFB4
10	gain	YBX1
10	gain	KDM4A
10	gain	TRO
10	gain	IDH3G
10	gain	ROGDI
10	gain	COASY
10	gain	ERLEC1
10	gain	DNAJA2
10	gain	CDC42
10	gain	TRIB2
10	gain	FAM3A
10	gain	RDH11
10	gain	SMARCE1
10	gain	SNCB
10	gain	TIMM21
10	gain	ATP12A
10	gain	EXOSC7
10	gain	MKRN2
10	gain	MBNL3
10	gain	UBE2T
10	gain	SIRT6
10	gain	TOLLIP
10	gain	CIC
10	gain	RABL2B
10	gain	DUSP12
10	gain	DELE1
10	gain	RNF13
10	gain	ZNF324
10	gain	CHMP2B
10	gain	EIF3I
10	gain	OVGP1
10	gain	DIMT1
10	gain	MRPL28
10	gain	RBM22
10	gain	PSMC5
10	gain	RTRAF
10	gain	KHSRP
10	gain	RBBP9
10	gain	NECAP1
10	gain	PCBP4
10	gain	TFAP4
10	gain	NAT14
10	gain	FH
10	gain	CDV3
10	gain	SLC22A17
10	gain	AAAS
10	gain	BLNK
10	gain	MZF1
10	gain	PSMD8
10	gain	ATP5F1D
10	gain	NDUFB7
10	gain	MKNK2
10	gain	RANBP1
10	gain	ZDHHC8
10	gain	LZTR1
10	gain	SLC25A1
10	gain	PICK1
10	gain	LMF2
10	gain	RHBDD3
10	gain	MIEF1
10	gain	TXN2
10	gain	SGSM3
10	gain	CHADL
10	gain	COCH
10	gain	GNPNAT1
10	gain	CNIH1
10	gain	PSMA3
10	gain	VTI1B
10	gain	TELO2
10	gain	PSMA6
10	gain	NFKBIA
10	gain	PCIF1
10	gain	ARFGAP1
10	gain	ARFRP1
10	gain	IDH3B
10	gain	DNTTIP1
10	gain	APMAP
10	gain	CEP76
10	gain	SMAD7
10	gain	NAA10
10	gain	PCSK1N
10	gain	CDK16
10	gain	BEX4
10	gain	CLN5
10	gain	CBLN1
10	gain	ACD
10	gain	POLR2C
10	gain	HCFC1R1
10	gain	TAF1C
10	gain	NME4
10	gain	RHBDL1
10	gain	NUBP1
10	gain	UBFD1
10	gain	ELOB
10	gain	QPRT
10	gain	TRIM35
10	gain	ZC2HC1A
10	gain	PLEKHJ1
10	gain	OAZ1
10	gain	STX10
10	gain	PTOV1
10	gain	TIMM44
10	gain	CCDC61
10	gain	PDCD5
10	gain	CLIP3
10	gain	MRPL4
10	gain	CYTH2
10	gain	TMEM205
10	gain	GCDH
10	gain	CHCHD2
10	gain	TSPAN13
10	gain	MRPL32
10	gain	YKT6
10	gain	AK1
10	gain	NPDC1
10	gain	DVL1
10	gain	FBXL15
10	gain	CUEDC2
10	gain	EDRF1
10	gain	GIT1
10	gain	RPL19
10	gain	RUNDC3A
10	gain	GOSR2
10	gain	CDK5RAP3
10	gain	RNF167
10	gain	MED31
10	gain	CNTNAP1
10	gain	MRPL27
10	gain	RND2
10	gain	FAM20A
10	gain	MMD
10	gain	NAT9
10	gain	UNC119
10	gain	AADAT
10	gain	LRP2BP
10	gain	NCAPG
10	gain	HTATIP2
10	gain	B3GAT1
10	gain	PRPF19
10	gain	PANX1
10	gain	COMMD9
10	gain	CD81
10	gain	PITPNM1
10	gain	PRDM4
10	gain	ASIC1
10	gain	KCTD10
10	gain	GAPDH
10	gain	GNB3
10	gain	CDCA3
10	gain	USP5
10	gain	TPI1
10	gain	COX6A1
10	gain	TDP2
10	gain	MAK
10	gain	MTRF1L
10	gain	CD83
10	gain	BAG2
10	gain	RAB23
10	gain	TTK
10	gain	APBB3
10	gain	CLK4
10	gain	PPP2CA
10	gain	NPRL2
10	gain	C3orf14
10	gain	UMPS
10	gain	NCBP2
10	gain	CSPG5
10	gain	COMMD2
10	gain	ACTR1B
10	gain	RPS15
10	gain	AUP1
10	gain	UNC50
10	gain	HSPE1
10	gain	CNPPD1
10	gain	RMDN2
10	gain	SRSF7
10	gain	TIA1
10	gain	CACYBP
10	gain	AMPD2
10	gain	MIIP
10	gain	CD58
10	gain	MRPS15
10	gain	BMP8B
10	gain	RPF1
10	gain	GALE
10	gain	ATP6V0B
10	gain	PIK3R3
10	gain	DR1
10	gain	PRDX6
10	gain	CTSD
10	gain	RAB32
10	gain	RXYLT1
10	gain	MYL12B
10	gain	CCND2
10	gain	ALG2
10	gain	ACOT2
10	gain	ALDH6A1
10	gain	OGFRL1
10	gain	CUTC
10	gain	PYROXD2
10	gain	SMNDC1
10	gain	TTLL2
10	gain	ENY2
10	gain	PROSER1
10	gain	UFM1
10	gain	EXOSC8
10	gain	TARDBP
10	gain	CRISPLD1
10	gain	MAPK8IP1
10	gain	PILRB
10	gain	FABP3
10	gain	ZSCAN20
10	gain	GPSM2
10	gain	MTERF4
10	gain	RPL5
10	gain	PHF24
10	gain	BHLHE41
10	gain	TRIR
10	gain	NDUFAF4
10	gain	RAB9B
10	gain	PLA2G12A
10	gain	MXD4
10	gain	OBSL1
10	gain	SRSF6
10	gain	WRNIP1
10	gain	KLHDC3
10	gain	RPL23
10	gain	SNRPB2
10	gain	TMEM74B
10	gain	MRPS26
10	gain	AMOT
10	gain	LRFN3
10	gain	IRF3
10	gain	PRMT1
10	gain	SBDS
10	gain	OMG
10	gain	TMEM35A
10	gain	COX7C
10	gain	SLC35E1
10	gain	UQCR11
10	gain	SYNGR3
10	gain	AAMP
10	gain	ECHS1
10	gain	ATF4
10	gain	EMC4
10	gain	OSGEPL1
10	gain	DUT
10	gain	MPDU1
10	gain	CDO1
10	gain	PGAP6
10	gain	PHF10
10	gain	GTPBP3
10	gain	DDA1
10	gain	MRPL34
10	gain	JUND
10	gain	CALY
10	gain	ADRM1
10	gain	UBE2M
10	gain	ARHGEF16
10	gain	EIF3G
10	gain	SHFL
10	gain	SLC6A8
10	gain	ACAP3
10	gain	PRKAB2
10	gain	ACTR10
10	gain	RAN
10	gain	MYBBP1A
10	gain	FIGNL1
10	gain	WBP2
10	gain	KDM6B
10	gain	ERAL1
10	gain	VPS4A
10	gain	PCED1A
10	gain	OSER1
10	gain	SYT4
10	gain	NMUR2
10	gain	SLC41A1
10	gain	RFXAP
10	gain	WDR74
10	gain	C12orf29
10	gain	DUSP26
10	gain	EDEM1
10	gain	HMGCS2
10	gain	AP4B1
10	gain	TMEM106C
10	gain	SLC38A2
10	gain	RSAD2
10	gain	RTL8C
10	gain	BIVM
10	gain	CTSL
10	gain	HRK
10	gain	TMEM243
10	gain	B4GALNT1
10	gain	HNRNPA1
10	gain	CD164
10	gain	PIGC
10	gain	DNAJB2
10	gain	WNT10A
10	gain	COX5B
10	gain	TMEM127
10	gain	BORA
10	gain	KDELR2
10	gain	TBRG4
10	gain	NACAD
10	gain	RSAD1
10	gain	VEZF1
10	gain	RPL35
10	gain	IL11RA
10	gain	TMEM8B
10	gain	RPS6
10	gain	FOXP4
10	gain	TMEM14B
10	gain	TUBB2A
10	gain	TUBB2B
10	gain	UQCC2
10	gain	FAM8A1
10	gain	CPEB2
10	gain	RABGGTB
10	gain	PPM1B
10	gain	SLC5A6
10	gain	CYP2C9
10	gain	ASNSD1
10	gain	MDH1B
10	gain	CASP6
10	gain	VAMP1
10	gain	GLIPR1
10	gain	SYCP3
10	gain	CERS5
10	gain	ABHD13
10	gain	TMX1
10	gain	RAB15
10	gain	ZSCAN29
10	gain	SRP14
10	gain	CDAN1
10	gain	DHX38
10	gain	NOL3
10	gain	RHOT2
10	gain	RPS2
10	gain	NDUFB10
10	gain	RMC1
10	gain	ARRB2
10	gain	SAT2
10	gain	SLC16A3
10	gain	TRIM65
10	gain	PFKL
10	gain	IL19
10	gain	RPL11
10	gain	LMO4
10	gain	PPOX
10	gain	CERS2
10	gain	C1orf56
10	gain	JTB
10	gain	ACP1
10	gain	GUK1
10	gain	PSEN2
10	gain	REN
10	gain	RPS27A
10	gain	ETAA1
10	gain	SNRPG
10	gain	TPRKB
10	gain	FAHD2B
10	gain	RETREG2
10	gain	SLC25A38
10	gain	RPL32
10	gain	EIF2A
10	gain	NDUFS6
10	gain	GIN1
10	gain	FEM1C
10	gain	PCYOX1L
10	gain	LRRTM2
10	gain	RNF44
10	gain	DYNLT1
10	gain	WTAP
10	gain	PURB
10	gain	PTGES2
10	gain	MSRB2
10	gain	GSTO1
10	gain	FADS1
10	gain	EI24
10	gain	COMMD7
10	gain	YTHDF1
10	gain	LTO1
10	gain	TM7SF2
10	gain	ALDOA
10	gain	TMEM218
10	gain	TIRAP
10	gain	UBC
10	gain	ACAD8
10	gain	DPYSL4
10	gain	INPP1
10	gain	SLC25A4
10	gain	GUF1
10	gain	TADA1
10	gain	CAPSL
10	gain	LURAP1L
10	gain	SLC5A10
10	gain	THY1
10	gain	OTULIN
10	gain	ATP5MC3
10	gain	GABPA
10	gain	CYP2U1
10	gain	C16orf87
10	gain	OXA1L
10	gain	CNOT8
10	gain	SETD9
10	gain	ZKSCAN2
10	gain	RBM45
10	gain	KCTD18
10	gain	WHAMM
10	gain	N6AMT1
10	gain	RWDD2B
10	gain	TSPAN7
10	gain	ANKRD9
10	gain	EEF1A1
10	gain	TYSND1
10	gain	RPUSD3
10	gain	PWWP3B
10	gain	AP3S2
10	gain	KRTCAP3
10	gain	RHPN1
10	gain	TPRG1L
10	gain	CPA5
10	gain	NIT1
10	gain	DEDD
10	gain	FGF17
10	gain	FBXW5
10	gain	CFAP298
10	gain	ATP5MC1
10	gain	ADIPOR1
10	gain	PSMB4
10	gain	TMEM69
10	gain	ZDHHC1
10	gain	CARMIL2
10	gain	FAM131B
10	gain	CALM3
10	gain	TMEM234
10	gain	FNDC5
10	gain	NR2F6
10	gain	VMA21
10	gain	RRP1
10	gain	RALGDS
10	gain	DEDD2
10	gain	FLAD1
10	gain	SLC25A44
10	gain	RPL8
10	gain	ABCF3
10	gain	CYGB
10	gain	SRSF2
10	gain	LEMD2
10	gain	RPL26
10	gain	GNG3
10	gain	LBHD1
10	gain	SYVN1
10	gain	RPS6KA4
10	gain	COA7
10	gain	CZIB
10	gain	PEF1
10	gain	USP1
10	gain	B3GALT2
10	gain	ZNF281
10	gain	ARPC5
10	gain	IGSF8
10	gain	NCSTN
10	gain	SNED1
10	gain	NBPF20
10	gain	MRPL55
10	gain	MEMO1
10	gain	INHBB
10	gain	BOLA3
10	gain	PGLYRP4
10	gain	DCAF16
10	gain	PAQR3
10	gain	CGGBP1
10	gain	DCST2
10	gain	EIF5A2
10	gain	NEPRO
10	gain	COX18
10	gain	TIPARP
10	gain	RPL9
10	gain	RPP14
10	gain	PRRT3
10	gain	PLSCR2
10	gain	POLR2H
10	gain	PGRMC2
10	gain	APEH
10	gain	DUSP7
10	gain	ANXA5
10	gain	ADAD1
10	gain	ABCE1
10	gain	LSM6
10	gain	GRPEL2
10	gain	ANKRA2
10	gain	UBLCP1
10	gain	UTP15
10	gain	SLC35A1
10	gain	FASTK
10	gain	CTHRC1
10	gain	HNRNPK
10	gain	DYNLT3
10	gain	TRMT10B
10	gain	SLITRK5
10	gain	CFL2
10	gain	MAGEC3
10	gain	AMER2
10	gain	KBTBD6
10	gain	PMPCA
10	gain	ENTR1
10	gain	DIPK1B
10	gain	NSMF
10	gain	C12orf50
10	gain	SMCO4
10	gain	AMN
10	gain	NDUFB8
10	gain	BAG5
10	gain	NOLC1
10	gain	COX11
10	gain	ZNF202
10	gain	SMPD1
10	gain	TPP1
10	gain	AKIP1
10	gain	ATMIN
10	gain	CENPV
10	gain	LDHAL6A
10	gain	TMEM170A
10	gain	MRPL16
10	gain	MS4A5
10	gain	CCNDBP1
10	gain	ENGASE
10	gain	ATP5MG
10	gain	MIDN
10	gain	EEF2
10	gain	UBXN6
10	gain	DNASE1L2
10	gain	SLC22A11
10	gain	IRF2BP2
10	gain	MMADHC
10	gain	PDHB
10	gain	TMEM223
10	gain	CNNM3
10	gain	ANKRD49
10	gain	C2orf68
10	gain	SLC35G2
10	gain	UQCRFS1
10	gain	ZNF354A
10	gain	LMAN2
10	gain	RAB24
10	gain	GPRIN1
10	gain	DUS1L
10	gain	GPS1
10	gain	RFNG
10	gain	DCXR
10	gain	UBB
10	gain	TCAF2
10	gain	ARL6IP1
10	gain	TMEM43
10	gain	PAQR8
10	gain	NUDT6
10	gain	ATP6V0E2
10	gain	TMEM126B
10	gain	CDC42BPG
10	gain	FAM241B
10	gain	FAM98B
10	gain	ZDHHC16
10	gain	ZBTB26
10	gain	POLR1C
10	gain	TCEA2
10	gain	SPATA5L1
10	gain	TVP23B
10	gain	THOP1
10	gain	NME6
10	gain	MALT1
10	gain	GNB2
10	gain	MCRIP2
10	gain	C2CD2L
10	gain	MUS81
10	gain	RPL38
10	gain	CES2
10	gain	DHCR7
10	gain	LRRN3
10	gain	GPR137
10	gain	EIF1AX
10	gain	CNP
10	gain	CTSF
10	gain	LIG4
10	gain	B4GAT1
10	gain	RPL15
10	gain	CNIH2
10	gain	NDUFA11
10	gain	MICOS13
10	gain	ZNF654
10	gain	CHST1
10	gain	CCDC85B
10	gain	ZNF77
10	gain	TMPRSS7
10	gain	CHMP6
10	gain	B3GNT4
10	gain	CDK5R1
10	gain	SOX11
10	gain	PNMA1
10	gain	DPP7
10	gain	C18orf32
10	gain	POLR2L
10	gain	HNRNPA0
10	gain	BET1L
10	gain	RIC8A
10	gain	ZNF518B
10	gain	DTX3
10	gain	DHFR2
10	gain	GRINA
10	gain	CYBC1
10	gain	MRFAP1L1
10	gain	MRFAP1
10	gain	PER1
10	gain	ZNF664
10	gain	SLITRK4
10	gain	ZNF154
10	gain	LYNX1
10	gain	RRH
10	gain	MCFD2
10	gain	SERTM1
10	gain	TLCD5
10	gain	ZNF322
10	gain	WASHC1
10	gain	ATG9B
10	gain	AMIGO1
10	gain	PRKAG1
10	gain	PNMA8A
10	gain	TMEM259
10	gain	MRPL41
10	gain	ARL6IP4
10	gain	SYNM
10	gain	B4GALNT4
10	gain	PGBD4
10	gain	GLRX5
10	gain	FAM104B
10	gain	CAV3
10	gain	IGIP
10	gain	C11orf54
10	gain	RABIF
10	gain	DDX41
10	gain	GTF2H2C
10	gain	COA5
10	gain	CBX6
10	gain	AIFM3
10	gain	TTC32
10	gain	UQCR10
10	gain	KCNK12
10	gain	WDR27
10	gain	SEPTIN5
10	gain	ARMCX2
10	gain	JAG2
10	gain	AQP12A
10	gain	MANEAL
10	gain	AQP12B
10	gain	NRBP2
10	gain	RBM11
10	gain	HGS
10	gain	MAPK11
10	gain	PDIA2
10	gain	PMEL
10	gain	C11orf87
10	gain	PCYT2
10	gain	CYP2R1
10	gain	GPAT2
10	gain	RPS23
10	gain	FAM86B1
10	gain	SMIM29
10	gain	ZACN
10	gain	TMPRSS11A
10	gain	AKR1C1
10	gain	TAF9B
10	gain	SIRT7
10	gain	MCRS1
10	gain	TMEM220
10	gain	SHISA7
10	gain	OVCH1
10	gain	ZNF626
10	gain	HES4
10	gain	PLSCR1
10	gain	ZNF559
10	gain	SLC24A5
10	gain	OR2G6
10	gain	FBLL1
10	gain	NHLRC3
10	gain	FAM47E
10	gain	TSPYL1
10	gain	ADH7
10	gain	WDR5
10	gain	POTEF
10	gain	AMZ2
10	gain	PDLIM7
10	gain	FLNA
10	gain	ZNF585A
10	gain	MAFG
10	gain	MRPL21
10	gain	HNRNPAB
10	gain	OR2L5
10	gain	SERPINB2
10	gain	ZNF181
10	gain	INKA2
10	gain	GPAA1
10	gain	C1orf122
10	gain	ZNF335
10	gain	RPL23A
10	gain	ZKSCAN8
10	gain	GPN1
10	gain	COPS8
10	gain	KLHL9
10	gain	ANKRD13B
10	gain	SLC5A3
10	gain	FICD
10	gain	RUNDC1
10	gain	L1CAM
10	gain	DCLRE1A
10	gain	MAGEE1
10	gain	COX20
10	gain	H2BC18
10	gain	TCEAL6
10	gain	PJVK
10	gain	RACK1
10	gain	TRIM13
10	gain	MS4A13
10	gain	CCDC85C
10	gain	CPT1B
10	gain	HMGN1
10	gain	DNAJC19
10	gain	TMEM200C
10	gain	SELENOH
10	gain	SLC48A1
10	gain	RNF208
10	gain	CRYGS
10	gain	MLLT11
10	gain	COG8
10	gain	KRT222
10	gain	ERV3-1
10	gain	TMX2
10	gain	SLC23A3
10	gain	REPIN1
10	gain	VSTM5
10	gain	HNRNPUL2
10	gain	MYL5
10	gain	GAB4
10	gain	TMEM167B
10	gain	TNFRSF25
10	gain	AP4M1
10	gain	PVALEF
10	gain	SRRM5
10	gain	HSBP1
10	gain	RPS28
10	gain	JRK
10	gain	HNRNPUL2-BSCL2
10	gain	BRD3OS
10	gain	SPAAR
10	gain	RBM14
10	gain	ALKBH6
10	gain	ASB14
10	gain	ATP5MF
10	gain	ATP5PO
10	gain	ARHGDIG
10	gain	KCTD7
10	gain	ZNF512
10	gain	DDOST
10	gain	RBM12
10	gain	ABHD14A
10	gain	YJEFN3
10	gain	ARPC4-TTLL3
10	gain	GPR162
10	gain	CENPS-CORT
10	gain	ALG11
10	gain	ATXN7L3B
10	gain	OR6J1
10	gain	CHURC1
10	gain	SPECC1L-ADORA2A
10	gain	TUBB3
10	gain	LYPD8
10	gain	SCX
10	gain	TCF24
10	gain	RBM8A
10	gain	STRADA
10	gain	EGLN2
10	gain	BORCS7-ASMT
10	gain	NOL12
10	gain	TPTE
10	gain	LYNX1-SLURP2
10	gain	FKBP4
10	gain	FBXL3
10	gain	WIZ
10	gain	MAT2B
10	gain	PHPT1
10	gain	STOML1
10	gain	IFT80
10	gain	PYGM
10	gain	ATP6AP1
10	gain	PDCD2
10	gain	TCF7
10	gain	PIGS
10	gain	FKBP1A
10	gain	RPLP0
10	gain	DNAJB11
10	gain	SNAP23
10	gain	WFDC2
10	gain	RBM3
10	gain	STUB1
10	gain	LIN7B
10	gain	C19orf53
10	gain	RPS16
10	gain	NOP53
10	gain	ETFB
10	gain	BABAM1
10	gain	RABAC1
10	gain	GSK3A
10	gain	CBLL1
10	gain	PSMA2
10	gain	SLC25A11
10	gain	DDX25
10	gain	COPZ1
10	gain	COPS7A
10	gain	MRPL18
10	gain	HARS2
10	gain	CCNG1
10	gain	TUSC2
10	gain	GORASP1
10	gain	SNX17
10	gain	WRAP73
10	gain	RGS2
10	gain	RPS10
10	gain	MOCS1
10	gain	ARMCX1
10	gain	ZNF484
10	gain	GNAZ
10	gain	ATP6V1F
10	gain	TRIM28
10	gain	METTL26
10	gain	SCLY
10	gain	H3-3B
10	gain	ERG28
10	gain	CCT7
10	gain	HUS1
10	gain	SRSF1
10	gain	MRPL50
10	gain	DCTN3
10	gain	PIANP
10	gain	SNRPF
10	gain	SCRN2
10	gain	RPS11
10	gain	C1orf216
10	gain	HDGF
10	gain	SFRP2
10	gain	RPS3A
10	gain	RPL7
10	gain	PAXX
10	gain	CLEC1A
10	gain	NDUFC2
10	gain	THYN1
10	gain	FBXO4
10	gain	ZNF776
10	gain	MRPL10
10	gain	CSTB
10	gain	CHRNB2
10	gain	UBXN1
10	gain	RBM15
10	gain	C1QTNF7
10	gain	KRTCAP2
10	gain	UQCRQ
10	gain	ZNF12
10	gain	CDK5
10	gain	STOML2
10	gain	LMO1
10	gain	CIAO2B
10	gain	PPIB
10	gain	PRDX2
10	gain	BSCL2
10	gain	RAB4B-EGLN2
10	gain	RPS7
10	gain	COPS9
10	gain	PPP1CA
10	gain	MRPL57
10	gain	GMPPB
10	gain	TRMT10C
10	gain	COX8A
10	gain	RPS27
10	gain	NDUFV2
10	gain	TUFM
10	gain	RPL35A
10	gain	HMGN4
10	gain	GPR19
10	gain	VPS33B
10	gain	CRELD2
10	gain	SLITRK2
10	gain	MAGEH1
10	gain	TUBB4B
10	gain	RPS26
10	gain	S100A6
10	gain	UBL5
10	gain	PIM3
10	gain	TMA16
10	gain	ZNF580
10	gain	NUP62
10	gain	NRAS
10	gain	MXD3
10	gain	ARL2
10	gain	LEPROT
10	gain	TMA7
10	gain	CDKN2AIPNL
10	gain	RNF103
10	gain	C22orf39
10	gain	EIF6
10	gain	MRPS6
10	gain	RTL9
10	gain	RPL36A-HNRNPH2
10	gain	SRSF8
10	gain	RPL17
10	gain	WDR54
10	gain	SPA17
10	gain	MBD3
10	gain	SLC46A1
10	gain	HDAC10
10	gain	ADAP1
10	gain	CD5
10	gain	PGLS
10	gain	IGSF10
10	gain	PRR14
10	gain	CCDC24
10	gain	C1QL3
10	gain	C9orf131
10	gain	KLHL17
10	gain	ARRDC1
10	gain	E2F4
10	gain	SAMD9
10	gain	IL10RB
10	gain	GGCT
10	gain	CUL7
10	gain	CPOX
10	gain	APEX1
10	gain	MMP15
10	gain	SEC61B
10	gain	DNAJC4
10	gain	NDUFS7
10	gain	ETV3
10	gain	EIF2B2
10	gain	B4GALT4
10	gain	POLM
10	gain	SSBP4
10	gain	THOC6
10	gain	TIMM10B
10	gain	DPH2
10	gain	BHLHE40
10	gain	TMEM258
10	gain	NIPSNAP3A
10	gain	COMMD4
10	gain	ADAM15
10	gain	HAX1
10	gain	GMPPA
10	gain	TCTA
10	gain	MANF
10	gain	PYURF
10	gain	TRPT1
10	gain	TWF1
10	gain	ZNF773
10	gain	MED7
10	gain	GDF6
10	gain	KLHDC9
10	gain	SSR2
10	gain	RELL2
10	gain	NOL6
10	gain	TAF10
10	gain	RAB8A
10	gain	BATF2
10	gain	MAT2A
10	gain	C11orf24
10	gain	DRC3
10	gain	USP19
10	gain	MAB21L3
10	gain	DIRAS1
10	gain	EIF2S3B
10	gain	CMTR2
10	gain	MRPS11
10	gain	FAM131C
10	gain	EPOR
10	gain	MORN2
10	gain	C15orf61
10	gain	MRPL38
10	gain	PHB2
10	gain	FANCG
10	gain	SMIM27
10	gain	SERPINE3
10	gain	NPIPA2
10	gain	FNTB
10	gain	NDUFA7
10	gain	FAM47E-STBD1
10	gain	FMO3
10	gain	BIRC3
10	gain	SOX30
10	gain	KLF6
10	gain	CACNA1S
10	gain	ORC6
10	gain	IL2RB
10	gain	HRH3
10	gain	HAS1
10	gain	ZBTB24
10	gain	EXOSC2
10	gain	POSTN
10	gain	PSTPIP1
10	gain	GATA6
10	gain	ETNK2
10	gain	TRIM11
10	gain	GPR78
10	gain	ETS2
10	gain	RETNLB
10	gain	ESM1
10	gain	BAALC
10	gain	CACNB3
10	gain	NEUROD2
10	gain	CLEC12A
10	gain	TLR1
10	gain	CSRP2
10	gain	CPNE7
10	gain	TPRX1
10	gain	KLHL25
10	gain	PGBD2
10	gain	ZNF74
10	gain	C2orf80
10	gain	PPP1R26
10	gain	SAMD13
10	gain	DAZ2
10	gain	APOL6
10	gain	POTEB2
10	gain	C8orf89
10	gain	CAMK1G
10	gain	BTG1
10	gain	BOD1
10	gain	TMBIM4
10	gain	SGSH
10	gain	CRIP2
10	gain	DCN
10	gain	RPL26L1
10	gain	JKAMP
10	gain	CDC34
10	gain	CST3
10	gain	NME3
10	gain	SETD6
10	gain	PNPO
10	gain	MAGOHB
10	gain	KCNJ5
10	gain	CHPF
10	gain	UROD
10	gain	EMG1
10	gain	ANAPC13
10	gain	TMEM160
10	gain	ARFIP2
10	gain	LAMTOR5
10	gain	ARF3
10	gain	CDK9
10	gain	CBX4
10	gain	PSMB6
10	gain	SIGMAR1
10	gain	FAU
10	gain	CRTC2
10	gain	EIF4E3
10	gain	BORCS7
10	gain	FTH1
10	gain	GABARAP
10	gain	SCAND1
10	gain	RPS21
10	gain	EID2
10	gain	IMPDH2
10	gain	SSR4
10	gain	RPS4X
10	gain	RPL10A
10	gain	ARPC4
10	gain	C4orf48
10	gain	EEF1G
10	gain	MTMR11
10	gain	RPL18
10	gain	CREB3
10	gain	PDE8B
10	gain	SELENOK
10	gain	RNASEL
10	gain	PI4K2A
10	gain	HTR5A
10	gain	GPRASP2
10	gain	PIP4P1
10	gain	NHLH2
10	gain	SMIM10L2A
10	gain	ARPC1A
10	gain	COX15
10	gain	RNASET2
10	gain	MFSD10
10	gain	SRF
10	gain	KPTN
10	gain	TMEM214
10	gain	MARCHF9
10	gain	LHX9
10	gain	ZNF233
10	gain	ZNF219
10	gain	POLL
10	gain	ELFN2
10	gain	SPRY4
10	gain	SPRED3
10	gain	LDB1
10	gain	ASIC3
10	gain	FNDC10
10	gain	SLC38A5
10	gain	CCDC80
10	gain	PGC
10	gain	EPX
10	gain	LBP
10	gain	SYT5
10	gain	HNF1A
10	gain	MTHFS
10	gain	TMEM91
10	gain	U2AF1
10	gain	TIGD4
10	gain	MANEA
10	gain	DAND5
10	gain	F2
10	gain	ZSWIM9
10	gain	ZSCAN26
10	gain	STARD10
10	gain	CSKMT
10	gain	C5orf58
10	gain	DEF6
10	gain	CNPY1
10	gain	ZNF182
10	gain	WNT10B
10	gain	TP53I11
10	gain	BTN3A1
10	gain	IL17RB
10	gain	WNT8B
10	gain	TP53INP2
10	gain	RAD54L
10	gain	SEMA4G
10	gain	CABP7
10	gain	SIX4
10	gain	PORCN
10	gain	ZNF821
10	gain	MTHFSD
10	gain	MINDY4
10	gain	TCIRG1
10	gain	GMNN
10	gain	MRPL2
10	gain	ACTR8
10	gain	CD274
10	gain	GPR108
10	gain	CKMT2
10	gain	ANKEF1
10	gain	MEN1
10	gain	PRADC1
10	gain	CARF
10	gain	RNPEPL1
10	gain	CAPN10
10	gain	ACP4
10	gain	C1orf162
10	gain	DOK3
10	gain	NUDT22
10	gain	ZNF385A
10	gain	SNRNP25
10	gain	OMA1
10	gain	RFC4
10	gain	MED30
10	gain	SOHLH1
10	gain	PROSER3
10	gain	IGFBP6
10	gain	PPIC
10	gain	SLC50A1
10	gain	KCNAB3
10	gain	CAVIN4
10	gain	PWWP2B
10	gain	PDE12
10	gain	SH3BP5L
10	gain	OR2T12
10	gain	PNPLA2
10	gain	MAMDC4
10	gain	CYC1
10	gain	WFDC11
10	gain	ZNF571
10	gain	KCNE1
10	gain	LSM10
10	gain	UBE2F
10	gain	ZNF696
10	gain	DEFB131A
10	gain	GOLGA8R
10	gain	NIF3L1
10	gain	ZNF165
10	gain	MIB2
10	gain	RIPPLY2
10	gain	MYCBP
10	gain	RAD51AP2
10	gain	ZNF688
10	gain	AARSD1
10	gain	FMC1-LUC7L2
10	gain	ALG1
10	gain	BIK
10	gain	CFHR3
10	gain	OASL
10	gain	LDLRAP1
10	gain	EVPL
10	gain	IBA57
10	gain	TMEM244
10	gain	FAM136A
10	gain	ZNF213
10	gain	GPR63
10	gain	LSM8
10	gain	ELOF1
10	gain	TBC1D8B
10	gain	RDH12
10	gain	MSS51
10	gain	FANCB
10	gain	POU3F2
10	gain	SIGIRR
10	gain	ARPIN-AP3S2
10	gain	PIGV
10	gain	KIAA2013
10	gain	CD101
10	gain	ESPL1
10	gain	LGI4
10	gain	C8orf33
10	gain	OR6A2
10	gain	UGT2B17
10	gain	SYS1
10	gain	DGKA
10	gain	CHRNA4
10	gain	PLXNA3
10	gain	NPAP1
10	gain	SNRPA
10	gain	ACADS
10	gain	IFI6
10	gain	GSTM3
10	gain	ZNF614
10	gain	UBE2L6
10	gain	HENMT1
10	gain	GOLT1A
10	gain	QRFPR
10	gain	SBK2
10	gain	CCDC154
10	gain	GPATCH3
10	gain	MUC22
10	gain	CHERP
10	gain	MED10
10	gain	NBL1
10	gain	LRATD1
10	gain	SH2D5
10	gain	SMIM10L2B
10	gain	TIMM13
10	gain	FLRT3
10	gain	MYL1
10	gain	THAP2
10	gain	THAP5
10	gain	TSPYL5
10	gain	ADGRG1
10	gain	CSTF1
10	gain	CHMP2A
10	gain	PGRMC1
10	gain	LACTB
10	gain	ADGRB2
10	gain	TSPAN2
10	gain	TMED7
10	gain	STC1
10	gain	CCDC112
10	gain	CDK5R2
10	gain	PAGR1
10	gain	CA2
10	gain	H2AZ1
10	gain	BET1
10	gain	RGP1
10	gain	MRPS7
10	gain	HECTD3
10	gain	MRPS18C
10	gain	HHIP
10	gain	PRIM1
10	gain	ZNF649
10	gain	ZNF770
10	gain	CIPC
10	gain	RBMXL1
10	gain	P2RX5-TAX1BP3
10	gain	PTGDS
10	gain	ADSL
10	gain	ACCS
10	gain	TMEM134
10	gain	PRDX4
10	gain	TRIM43B
10	gain	ZNF517
10	gain	PPCS
10	gain	KMT5C
10	gain	ECM1
10	gain	WNT9A
10	gain	HIGD2B
10	gain	PHLDA1
10	gain	TMEM209
10	gain	SLC25A31
10	gain	STMND1
10	gain	CPSF4
10	gain	ZGLP1
10	gain	PEA15
10	gain	PEG10
10	gain	PYGO2
10	gain	LSMEM1
10	loss	NA
11	gain	PON1
11	gain	RFPL1
11	gain	RHOB
11	gain	MTFR2
11	gain	SPATA2
11	gain	BAIAP3
11	gain	DGAT2
11	gain	GSTP1
11	gain	PRELID3B
11	gain	CRYAB
11	gain	CDKN1B
11	gain	SLC30A3
11	gain	MUC5B
11	gain	NUDT10
11	gain	EDN3
11	gain	HNRNPH2
11	gain	LSM7
11	gain	COX16
11	gain	YIPF3
11	gain	FXYD6
11	gain	TMEM19
11	gain	PLK4
11	gain	CETN2
11	gain	DCK
11	gain	TSR2
11	gain	BBS5
11	gain	NIPSNAP3B
11	gain	SNAPC5
11	gain	MYADM
11	gain	PJA1
11	gain	NDN
11	gain	PRR36
11	gain	H1-10
11	gain	IFIT1
11	gain	GSPT2
11	gain	PPP3R1
11	gain	FXYD7
11	gain	GPX1
11	gain	PNMA6A
11	gain	RAD21L1
11	gain	ZCCHC3
11	gain	UTP14C
11	gain	FXYD6-FXYD2
11	gain	USP27X
11	gain	FUZ
11	gain	RWDD2A
11	gain	ZNF275
11	gain	CRYBB1
11	gain	C14orf93
11	gain	SLC17A9
11	gain	RS1
11	gain	PPP1R9B
11	gain	ZPR1
11	gain	RRP9
11	gain	PROC
11	gain	CNN3
11	gain	C1orf198
11	gain	CD244
11	gain	RAMP3
11	gain	GPR83
11	gain	SDC4
11	gain	NR1D1
11	gain	ELK1
11	gain	RNF112
11	gain	UCK1
11	gain	TRAF7
11	gain	TLR2
11	gain	DUSP10
11	gain	SDE2
11	gain	ADAMTS19
11	gain	MAL2
11	gain	TSPAN33
11	gain	H3-3A
11	gain	GHDC
11	gain	MMGT1
11	gain	FRMPD2
11	gain	EGFL7
11	gain	FAM156B
11	gain	FIZ1
11	gain	MRPL54
11	gain	FFAR4
11	gain	UBQLN2
11	gain	EIF3CL
11	gain	DUXA
11	gain	TMSB10
11	gain	CBLN4
11	gain	PSMD10
11	gain	DCTN6
11	gain	POLR2I
11	gain	RPL18A
11	gain	C12orf57
11	gain	CNR1
11	gain	PPP1R1A
11	gain	LYPD1
11	gain	C10orf82
11	gain	COMMD8
11	gain	ID4
11	gain	ZCCHC12
11	gain	TTC9B
11	gain	NXPH4
11	gain	MRPL30
11	gain	PNMA6F
11	gain	ZNF10
11	gain	MCAM
11	gain	PFN1
11	gain	RPS13
11	gain	HCRTR1
11	gain	CD63
11	gain	RPL29
11	gain	MORN4
11	gain	ZDHHC22
11	gain	GADD45GIP1
11	gain	HIGD1A
11	gain	PLGLB1
11	gain	PRAF2
11	gain	SPCS1
11	gain	DNAJB9
11	gain	RRAGA
11	gain	TRMT112
11	gain	MAGEF1
11	gain	MAD2L2
11	gain	CFHR5
11	gain	STRA8
11	gain	ACP2
11	gain	VPS33A
11	gain	SOCS5
11	gain	RBIS
11	gain	BOLA1
11	gain	IRX2
11	loss	EPN3
11	loss	RBM42
11	loss	MFSD9
11	loss	SLC18A2
11	loss	PCSK9
11	loss	TRHR
11	loss	FZD4
11	loss	ZNF543
11	loss	DNAJC22
11	loss	INSYN1
11	loss	SPAG4
11	loss	CIDEA
11	loss	LCNL1
11	loss	ZNF8
11	loss	RAB36
11	loss	LRRC71
11	loss	C16orf78
11	loss	GBP6
11	loss	C5orf47
11	loss	ZNF785
11	loss	SMIM3
11	loss	PNPLA5
11	loss	SOCS2
11	loss	PLA2G15
11	loss	PIH1D1
11	loss	CCKBR
11	loss	HEMK1
11	loss	MYBPC3
11	loss	EPHA2
11	loss	N4BP3
11	loss	KCNG2
11	loss	ZNF552
11	loss	ZNF544
11	loss	TTC4
11	loss	BSPRY
11	loss	KLK10
11	loss	EPPK1
11	loss	TGM7
11	loss	ALKBH4
11	loss	PLCD3
11	loss	IL17RE
11	loss	HEXIM2
11	loss	GBP7
11	loss	PLIN5
12	gain	LYPLA2
12	gain	ITIH4
12	gain	TGFB3
12	gain	PCDHB14
12	gain	ZNF835
12	gain	CDK4
12	gain	FRS3
12	gain	F13B
12	gain	MTA2
12	gain	SLC25A34
12	gain	ZNF843
12	gain	DGAT2L6
12	gain	POU5F2
12	gain	SH2D2A
12	gain	ACAA1
12	gain	ANGPT2
12	gain	ROPN1B
12	gain	LAMP5
12	gain	SGO1
12	gain	PREB
12	gain	MFSD13A
12	gain	CLEC18B
12	gain	TINAGL1
12	gain	TEX29
12	gain	TBCEL
12	gain	CDK20
12	gain	SCIMP
12	gain	KLK4
12	gain	COMMD5
12	gain	RCE1
12	gain	AEN
12	gain	OAF
12	gain	CARD9
12	gain	TMEM198
12	gain	FAM53B
12	gain	TMEM141
12	gain	PTGES3L
12	gain	TSPAN17
12	gain	SLC31A2
12	gain	ARMC5
12	gain	RECQL4
12	gain	SAC3D1
12	gain	SLC5A4
12	gain	SMARCD2
12	gain	OR2T33
12	gain	PDGFB
12	gain	LGALS13
12	gain	PCOLCE
12	gain	SAMD10
12	gain	CNGA4
12	gain	SLC3A1
12	gain	GEMIN7
12	gain	NR1I3
12	gain	GPR61
12	gain	PLXNB1
12	gain	SAP30
12	gain	TEPSIN
12	gain	NUDT16L1
12	gain	THBS3
12	gain	ALKAL2
12	gain	TIMM23B
12	gain	ALG3
12	gain	OR2M3
12	gain	HS3ST5
12	gain	THAP9
12	gain	NXPE2
12	loss	SEMA3F
12	loss	ETV7
12	loss	HGF
12	loss	NDRG1
12	loss	PON2
12	loss	EFNB3
12	loss	GABRA4
12	loss	CRTAM
12	loss	GSTM5
12	loss	SYT6
12	loss	POLR1E
12	loss	MTTP
12	loss	NUF2
12	loss	LSM14B
12	loss	CAMKV
12	loss	LAMB3
12	loss	MYL4
12	loss	PRRT4
12	loss	C11orf97
12	loss	SLC4A1
12	loss	ARAF
12	loss	SGK2
12	loss	EVA1A
12	loss	FBXO6
12	loss	EDA2R
12	loss	LIN28A
12	loss	PRRG4
12	loss	IP6K3
12	loss	CXCL16
12	loss	DNASE1L3
12	loss	ZNF575
12	loss	PCDH18
12	loss	ZNF677
12	loss	ASB4
12	loss	CCL26
12	loss	USH1C
12	loss	PAF1
12	loss	CD44
12	loss	RFXANK
12	loss	DAPP1
12	loss	PAFAH1B3
12	loss	ZNF268
12	loss	PLTP
12	loss	TUBB1
12	loss	APOBEC1
12	loss	HGD
12	loss	EFCC1
12	loss	TXNDC12
12	loss	OCM
12	loss	HOXC13
12	loss	TCP11
12	loss	GAMT
12	loss	RAB25
12	loss	MSI1
12	loss	ITM2C
12	loss	CNPY3
12	loss	CAPN11
12	loss	MMP7
12	loss	DBR1
12	loss	TTYH2
12	loss	CNGA3
12	loss	DRD2
12	loss	PRDM9
12	loss	PPP1R14D
12	loss	SPIC
12	loss	DEGS2
12	loss	SOSTDC1
12	loss	RND1
12	loss	LVRN
12	loss	TNFRSF10D
12	loss	WFDC9
12	loss	TMED9
12	loss	PDE6G
12	loss	MFAP5
12	loss	HMGN2
12	loss	ACSM4
12	loss	LINC02218
12	loss	ISOC1
12	loss	MUC3A
12	loss	POGLUT3
12	loss	SAGE1
12	loss	KCNMB2
12	loss	TVP23C-CDRT4
12	loss	FHL5
12	loss	XPNPEP2
12	loss	RAB38
12	loss	PLD2
12	loss	POLE3
12	loss	CCT4
12	loss	G6PC3
12	loss	PNMA8C
12	loss	POPDC2
12	loss	C1orf87
12	loss	SNX33
12	loss	PLXNB3
13	gain	WNT8A
13	gain	GMIP
13	gain	ARL2BP
13	gain	CCN4
13	gain	RAB17
13	gain	WDR87
13	gain	SMPX
13	gain	SEC14L2
13	gain	STEAP4
13	gain	ULBP2
13	gain	LANCL3
13	gain	DEPP1
13	gain	C16orf92
13	gain	PHOSPHO1
13	gain	SNN
13	gain	HYAL3
13	gain	IFRD2
13	gain	CCN6
13	gain	VAX2
13	gain	KCNK7
13	gain	PCDHA4
13	gain	PCDH12
13	gain	DUSP1
13	gain	TUBA1B
13	gain	CDKN2D
13	gain	RFX5
13	gain	POLR2K
13	gain	POPDC3
13	gain	SAP30L
13	gain	ARRDC4
13	gain	SF3B4
13	gain	ASB6
13	gain	FES
13	gain	BCL2L11
13	gain	VSIG10L2
13	loss	PLXND1
13	loss	FLT4
13	loss	CAPG
13	loss	P2RY10
13	loss	MMP2
13	loss	CDC45
13	loss	RASD2
13	loss	TNNT1
13	loss	THG1L
13	loss	MAPKAPK3
13	loss	QPCT
13	loss	CDK18
13	loss	TGM3
13	loss	RNF122
13	loss	PLPP2
13	loss	MR1
13	loss	ACTG2
13	loss	MOBP
13	loss	MYEOV
13	loss	BTC
13	loss	TVP23C
13	loss	OR7D2
13	loss	PLA2G4E
13	loss	MMP17
13	loss	ZNF534
13	loss	EIF1AY
13	loss	TXNDC8
13	loss	ONECUT3
13	loss	ATAD3C
13	loss	ORAI1
13	loss	PRICKLE3
13	loss	MYOC
13	loss	TEAD2
13	loss	MCM5
13	loss	APOBEC3H
13	loss	ACTR5
13	loss	SRPX2
13	loss	TGM5
13	loss	TNFRSF10A
13	loss	USHBP1
13	loss	TEX101
13	loss	PTGES
13	loss	APCDD1
13	loss	CDC20B
13	loss	ACOX2
13	loss	DPPA3
13	loss	SLC2A10
13	loss	CLEC19A
13	loss	DGKA
13	loss	CHRNA4
13	loss	PLXNA3
13	loss	NPAP1
13	loss	LIMS2
13	loss	AANAT
13	loss	NOTCH1
13	loss	GIP
13	loss	IZUMO2
13	loss	B3GNT3
13	loss	SNRPA
13	loss	ACADS
13	loss	IFI6
13	loss	GSTM3
13	loss	ZNF614
13	loss	UBE2L6
13	loss	HENMT1
13	loss	GOLT1A
13	loss	QRFPR
13	loss	SBK2
13	loss	CCDC154
13	loss	GPATCH3
13	loss	MUC22
13	loss	RBM24
13	loss	NUDT12
13	loss	IRF5
13	loss	ADAMTS14
13	loss	JUN
13	loss	GABRR3
13	loss	IDO2
13	loss	HDHD3
13	loss	SAMD1
13	loss	GPR26
13	loss	GPX3
13	loss	WNT7A
13	loss	PEA15
13	loss	PEG10
13	loss	SSTR2
14	gain	CDKL3
14	gain	RHBDF1
14	gain	PARP3
14	gain	ADAM7
14	gain	LXN
14	gain	EPYC
14	gain	PDRG1
14	gain	GNRHR
14	gain	CCND1
14	gain	UCHL3
14	gain	TBCC
14	gain	SLC25A35
14	gain	ZBED3
14	gain	ADAMDEC1
14	gain	TES
14	gain	C18orf21
14	gain	GBGT1
14	gain	ADM
14	gain	ADAM8
14	gain	LRRC14
14	gain	U2AF1L4
14	gain	IRX3
14	gain	GEN1
14	gain	GPR3
14	gain	ZNF284
14	gain	ZNF700
14	gain	ZXDB
14	gain	HHATL
14	gain	VSIG1
14	gain	PCGF1
14	gain	GPR75
14	gain	FGFRL1
14	gain	AOC2
14	gain	FMO5
14	gain	ZNF132
14	gain	ZC3H10
14	gain	TEX261
14	gain	CRIP3
14	gain	FBXO10
14	gain	ZNF230
14	gain	SHMT2
14	gain	CSF1
14	gain	ZKSCAN4
14	gain	DUSP28
14	gain	MYBPHL
14	gain	NDUFAF8
14	gain	CHPF2
14	gain	FTSJ1
14	gain	POP4
14	gain	PTCD1
14	gain	PDGFRB
14	gain	TRIM32
14	gain	MSTO1
14	gain	ROMO1
14	gain	PIM1
14	gain	DUOX1
14	gain	KHK
14	gain	ERVK3-1
14	gain	CCNA2
14	gain	MIS12
14	gain	MLST8
14	gain	ZNF32
14	gain	TRAPPC1
14	gain	COX14
14	gain	GCC1
14	gain	C14orf119
14	gain	TRAPPC5
14	gain	COA3
14	gain	SHISA4
14	gain	PRCD
14	gain	ANKHD1-EIF4EBP3
14	gain	ARL14EPL
14	gain	RIOK2
14	gain	LNX1
14	gain	C1QL1
14	gain	PI15
14	gain	ZNF365
14	gain	NDUFB11
14	gain	COMMD3
14	gain	OXSM
14	gain	PPP1R15B
14	gain	CIART
14	gain	HEY1
14	gain	CHCHD1
14	gain	PLEKHF2
14	gain	CCDC184
14	gain	NDUFAF3
14	gain	RPP25
14	gain	ACKR1
14	gain	UQCRHL
14	gain	COMMD3-BMI1
14	gain	FOSL2
14	gain	SPATA48
14	gain	LRRC8C
14	gain	RTN4RL2
14	gain	CENPW
14	gain	FKBP7
14	gain	PUS3
14	gain	MRM3
14	gain	KCNN4
14	gain	PROX1
14	gain	NAA11
14	gain	FBRS
14	gain	SSTR3
14	gain	ARHGAP9
14	gain	ACP2
14	gain	VPS33A
14	gain	SOCS5
14	gain	RBIS
14	gain	BOLA1
14	gain	ATXN7L2
14	gain	SPRY3
14	gain	NPTX1
14	gain	PSMG1
14	loss	CAMK1G
14	loss	BTG1
14	loss	BOD1
14	loss	TMBIM4
14	loss	SGSH
14	loss	CRIP2
14	loss	PDGFB
14	loss	PGRMC1
14	loss	LACTB
14	loss	ADGRB2
14	loss	TSPAN2
14	loss	TMED7
14	loss	STC1
14	loss	CCDC112
14	loss	CDK5R2
14	loss	PAGR1
14	loss	BSPRY
14	loss	KMT5C
14	loss	ECM1
14	loss	WNT9A
14	loss	HIGD2B
14	loss	SHF
14	loss	ST6GAL2
14	loss	PTMS
14	loss	AGPAT2
14	loss	MARCKS
14	loss	ALS2CL
14	loss	ZNF512B
14	loss	ZFP41
14	loss	ARSI
15	gain	FMO1
15	gain	MYH3
15	gain	PMP22
15	gain	ARHGAP40
15	gain	RIBC2
15	gain	TMPRSS6
15	gain	NPIPA8
15	gain	NATD1
15	gain	FOLH1
15	gain	KCND1
15	gain	TMEM176B
15	gain	B4GALT2
15	gain	MYCT1
15	gain	DSC2
15	gain	ICOSLG
15	gain	ANO9
15	gain	SAPCD2
15	gain	FAM72A
15	gain	HAUS7
15	gain	BUB1B-PAK6
15	gain	FAM83D
15	gain	GDPD3
15	gain	NRGN
15	gain	SF3A2
15	gain	NEK3
15	gain	MAPK13
15	gain	DOK4
15	gain	ACSS1
15	gain	BRPF1
15	gain	ZC3H12C
15	gain	PLCB3
15	gain	KCNJ16
15	gain	FAM43B
15	gain	TMEM52B
15	loss	NPC1L1
15	loss	NODAL
15	loss	USF1
15	loss	CA2
15	loss	H2AZ1
15	loss	BET1
15	loss	RGP1
15	loss	MRPS7
15	loss	HECTD3
15	loss	MRPS18C
15	loss	HHIP
15	loss	PRIM1
15	loss	ZNF649
15	loss	ZNF770
15	loss	CIPC
15	loss	RBMXL1
15	loss	P2RX5-TAX1BP3
15	loss	IGFBP2
15	loss	WDR55
15	loss	NUDT16
15	loss	TMEM209
15	loss	SLC25A31
15	loss	STMND1
15	loss	FAM83A
15	loss	ZNF217
15	loss	JAKMIP1
[truncated: 4,444 more rows]
