# Supplementary material for: Whole genome duplication drove cell type evolution in the vertebrate brain
Source: Research Square preprint supplement (doi:10.21203/rs.3.rs-6965966/v1), 2025-07-04
Supplement: Supplementary file 5 [file 5d662fd173b90ccbe2d47427.xlsx]

## Sheet: S4 Marker references
Table S4. Marker genes of Astrocytes and oligodendrocyte subtypes.
Species	Symbol	Cell type	Gene type	Gene ID in P. mar.	Notes	Citations	PMID	Title
Vertebrate conserved	Foxg1	Telencephalon astrocytes	TF	MSTRG.10939, PMZ_0030209, PMZ_0043056		Miyoshi, et al, 2021	34145239	FoxG1 regulates the formation of cortical GABAergic circuit during an early postnatal critical period resulting in autism spectrum disorder-like phenotypes
Mammal conserved	Pax3	Bergmann glia	TF	MSTRG.13524, MSTRG.18473		Stoykova, et al, 1994	8126546	Roles of Pax-genes in developing and adult brain as suggested by expression patterns
Mammal conserved	Mybpc1	Bergmann glia	effector	MSTRG.18242, MSTRG.18243, MSTRG.5467, PMZ_0038351		Rodriques, et al, 2020	30923225	Slide-seq: A Scalable Technology for Measuring Genome-Wide Expression at High Spatial Resolution
Vertebrate conserved	Sphk1	olfactory ensheathing cells	effector	MSTRG.16654	Conserved in mouse and lamprey, no olfactory bulb data in human and lizard, but likely also expressed in their OB.	Bao, et al, 2020	32057144	Sphingosine 1-phosphate promotes the proliferation of olfactory ensheathing cells through YAP signaling and participates in the formation of olfactory nerve layer
NA	Aplnr	Midbrain astrocytes−like	effector	MSTRG.3100, MSTRG.3102		Zeisel, et al, 2018	30096314	Molecular Architecture of the Mouse Nervous System
NA	Tfap2c	Radial glia-like cells	TF	MSTRG.104, MSTRG.591, MSTRG.6430, PMZ_0043740, PMZ_0043741		Zeisel, et al, 2018	30096314	Molecular Architecture of the Mouse Nervous System
Amniote conserved	Slc17a7	Telencephalon astrocytes	effector	MSTRG.857		Ceglia, et al, 2023	37674083	Specialized astrocytes mediate glutamatergic gliotransmission in the CNS
Amniote conserved	Slc17a6	Non−Telencephalon astrocytes	effector	MSTRG.857		Ceglia, et al, 2023	37674083	Specialized astrocytes mediate glutamatergic gliotransmission in the CNS
Amniote conserved	Gfap	fibrous astrocytes	effector	MSTRG.17906, MSTRG.470, MSTRG.5845, MSTRG.5846, MSTRG.5877, MSTRG.6189, MSTRG.6552, PMZ_0038180		Zeisel, et al, 2018	30096314	Molecular Architecture of the Mouse Nervous System
Amniote conserved	Mag	Oligodendrocytes	effector	NA		Quales, 2007	17241126	Myelin-associated glycoprotein (MAG): past, present and beyond
Amniote conserved	Gpr17	Committed OPCs	effector	NA		Chen, et al, 2009	19838178	The oligodendrocyte-specific G protein-coupled receptor GPR17 is a cell-intrinsic timer of myelination
Amniote conserved	Pdgfra	OPCs	effector	MSTRG.8489		Zheng, et al, 2018	30242047	Molecular and Genetic Evidence for the PDGFRα-Independent Population of Oligodendrocyte Progenitor Cells in the Developing Mouse Brain
