# Supplementary material for: Whole genome duplication drove cell type evolution in the vertebrate brain
Source: Research Square preprint supplement (doi:10.21203/rs.3.rs-6965966/v1), 2025-07-04
Supplement: Supplementary file 6 [file 7e6f28f34bafc4f92486a349.xlsx]

## Sheet: Hsap.AST-GABA
Table S5. LMM results for human astrocytes-GABA.
Gene	Cell type	location	Residual	Category
ENSG00000000003	0.976537	0.00772681	0.0157359	High across cell type family
ENSG00000000005	0.315956	0.144358	0.539686	High across cell type family
ENSG00000000419	0	0.44344	0.55656	High across location
ENSG00000000457	0.74492	0	0.25508	High across cell type family
ENSG00000000460	0	0.430734	0.569266	High across location
ENSG00000000938	0.392355	0.18563	0.422016	High across cell type family
ENSG00000000971	0.848782	0	0.151218	High across cell type family
ENSG00000001036	0.323432	0.206576	0.469991	High across cell type family
ENSG00000001084	0.915194	0.0505245	0.0342819	High across cell type family
ENSG00000001167	0.942379	0	0.0576208	High across cell type family
ENSG00000001460	0.183001	0.401935	0.415064	High across location
ENSG00000001461	0.844351	0.0484179	0.107231	High across cell type family
ENSG00000001497	0.712635	0	0.287365	High across cell type family
ENSG00000001561	0	0.772732	0.227268	High across location
ENSG00000001617	0.929485	0	0.0705149	High across cell type family
ENSG00000001626	0.703589	0	0.296411	High across cell type family
ENSG00000001629	0.790303	0.0350753	0.174621	High across cell type family
ENSG00000001630	0	0.298408	0.701592	High across location
ENSG00000001631	0.276847	0	0.723153	High across cell type family
ENSG00000002016	0.714867	0.14864	0.136494	High across cell type family
ENSG00000002330	0.560611	0	0.439389	High across cell type family
ENSG00000002549	0.871403	2.98318e-10	0.128597	High across cell type family
ENSG00000002586	0.992094	0.00480255	0.00310341	High across cell type family
ENSG00000002587	0.3461	0	0.6539	High across cell type family
ENSG00000002726	8.34606e-11	0.193834	0.806166	None
ENSG00000002745	0.615057	0.0800078	0.304935	High across cell type family
ENSG00000002746	0.862876	0.0569331	0.0801911	High across cell type family
ENSG00000002822	0.268819	0.400022	0.331159	Both to location and cell type
ENSG00000002834	0	0	1	None
ENSG00000002919	0	0.323708	0.676292	High across location
ENSG00000002933	0.52556	0.0888838	0.385556	High across cell type family
ENSG00000003056	0.839694	0.0455744	0.114732	High across cell type family
ENSG00000003096	0.81726	0.0902107	0.0925292	High across cell type family
ENSG00000003137	0.109148	2.06148e-09	0.890852	None
ENSG00000003147	0.977017	0.00840816	0.0145748	High across cell type family
ENSG00000003249	1.5076e-08	0.347479	0.652521	High across location
ENSG00000003393	0.880145	0	0.119855	High across cell type family
ENSG00000003400	0.843597	0.139909	0.0164935	High across cell type family
ENSG00000003402	0.925674	6.87587e-10	0.0743256	High across cell type family
ENSG00000003436	0.65495	0.2614	0.0836493	Both to location and cell type
ENSG00000003509	0.899894	0	0.100106	High across cell type family
ENSG00000003756	0.798643	0	0.201357	High across cell type family
ENSG00000003987	0.955192	0	0.0448084	High across cell type family
ENSG00000003989	0.855853	0.0564372	0.0877095	High across cell type family
ENSG00000004059	0.357679	1.66334e-15	0.642321	High across cell type family
ENSG00000004139	0	0	1	None
ENSG00000004142	0.36978	0.227223	0.402997	High across cell type family
ENSG00000004399	0.988439	0	0.0115606	High across cell type family
ENSG00000004455	0.485028	0	0.514972	High across cell type family
ENSG00000004468	0.988365	0	0.0116348	High across cell type family
ENSG00000004478	0.829624	0.0925623	0.0778136	High across cell type family
ENSG00000004487	0.860076	0	0.139924	High across cell type family
ENSG00000004534	0.875394	0.0244574	0.100149	High across cell type family
ENSG00000004660	0.080609	0	0.919391	None
ENSG00000004700	0	0.536421	0.463579	High across location
ENSG00000004766	0.768013	0	0.231987	High across cell type family
ENSG00000004776	0.808888	0	0.191112	High across cell type family
ENSG00000004777	0.698315	0.165185	0.136499	High across cell type family
ENSG00000004779	0	0.192876	0.807124	None
ENSG00000004799	0.959773	0	0.0402273	High across cell type family
ENSG00000004809	1.25334e-10	0.245219	0.754781	None
ENSG00000004838	0.562132	2.3265e-10	0.437868	High across cell type family
ENSG00000004846	0	0.474871	0.525129	High across location
ENSG00000004848	1.13222e-11	0.944449	0.0555511	High across location
ENSG00000004864	0.795767	0.068179	0.136054	High across cell type family
ENSG00000004866	0.845777	0	0.154223	High across cell type family
ENSG00000004897	0.922074	0.0554658	0.0224602	High across cell type family
ENSG00000004939	0	0.295092	0.704908	High across location
ENSG00000004948	0.508875	0.0692502	0.421875	High across cell type family
ENSG00000004961	0.930767	0	0.0692325	High across cell type family
ENSG00000004975	0.801096	0	0.198904	High across cell type family
ENSG00000005001	0.599165	0	0.400835	High across cell type family
ENSG00000005007	0.294467	0.0178165	0.687716	High across cell type family
ENSG00000005020	0	0.667367	0.332633	High across location
ENSG00000005022	0.232097	0	0.767903	None
ENSG00000005059	0	0.155338	0.844662	None
ENSG00000005075	0.415143	0.0143008	0.570556	High across cell type family
ENSG00000005100	0.832932	0	0.167068	High across cell type family
ENSG00000005102	0.473746	0.367586	0.158668	Both to location and cell type
ENSG00000005108	0.139895	0	0.860105	None
ENSG00000005156	0	0.507313	0.492687	High across location
ENSG00000005175	0.182728	0	0.817272	None
ENSG00000005187	0.458204	0	0.541796	High across cell type family
ENSG00000005189	0	0.0638082	0.936192	None
ENSG00000005194	0.91371	0	0.08629	High across cell type family
ENSG00000005206	0.919094	0	0.0809064	High across cell type family
ENSG00000005238	0.970042	0.00387377	0.0260845	High across cell type family
ENSG00000005243	0.913364	0.0358871	0.0507484	High across cell type family
ENSG00000005249	0.840157	0	0.159843	High across cell type family
ENSG00000005302	0	0.853069	0.146931	High across location
ENSG00000005339	0.988632	0	0.0113684	High across cell type family
ENSG00000005379	0.52994	0	0.47006	High across cell type family
ENSG00000005381	0.652834	0	0.347166	High across cell type family
ENSG00000005421	0.979327	0	0.0206727	High across cell type family
ENSG00000005436	0.91767	0	0.0823305	High across cell type family
ENSG00000005448	0.851618	0	0.148382	High across cell type family
ENSG00000005469	0.890444	0.0282625	0.0812934	High across cell type family
ENSG00000005471	0.339537	0	0.660463	High across cell type family
ENSG00000005483	0.424883	0	0.575117	High across cell type family
ENSG00000005486	0.929446	0	0.0705538	High across cell type family
ENSG00000005513	0.801526	2.4507e-10	0.198474	High across cell type family
ENSG00000005700	0.868816	0	0.131184	High across cell type family
ENSG00000005801	0.872808	9.12622e-11	0.127192	High across cell type family
ENSG00000005810	0.844917	0.0252738	0.129809	High across cell type family
ENSG00000005812	0.712729	0	0.287271	High across cell type family
ENSG00000005844	0.307573	0.418844	0.273584	Both to location and cell type
ENSG00000005882	0.248161	0.626674	0.125165	High across location
ENSG00000005884	0	0	1	None
ENSG00000005889	0.930591	0.0322928	0.0371161	High across cell type family
ENSG00000005893	0.961608	0	0.038392	High across cell type family
ENSG00000005961	0.0645497	0	0.93545	None
ENSG00000005981	0.97436	0	0.0256403	High across cell type family
ENSG00000006007	0.791446	0	0.208554	High across cell type family
ENSG00000006015	0.740778	1.00149e-17	0.259222	High across cell type family
ENSG00000006016	0	0	1	None
ENSG00000006025	0.929961	0.0169886	0.05305	High across cell type family
ENSG00000006042	0.534225	0	0.465775	High across cell type family
ENSG00000006047	0.618843	0.136515	0.244642	High across cell type family
ENSG00000006059	0.1331	0	0.8669	None
ENSG00000006062	0.904417	0	0.0955827	High across cell type family
ENSG00000006071	0.260587	0	0.739413	High across cell type family
ENSG00000006116	0.820134	0.0516331	0.128233	High across cell type family
ENSG00000006118	0.85847	5.51064e-10	0.14153	High across cell type family
ENSG00000006125	0.948036	0.0034855	0.0484782	High across cell type family
ENSG00000006128	0.847121	0.0822135	0.0706657	High across cell type family
ENSG00000006194	0.598395	0.0230363	0.378569	High across cell type family
ENSG00000006210	0.690706	0.156193	0.153101	High across cell type family
ENSG00000006282	0.897503	0	0.102497	High across cell type family
ENSG00000006283	0.92141	0.0389091	0.0396804	High across cell type family
ENSG00000006327	0.605916	0	0.394084	High across cell type family
ENSG00000006377	0.542237	0	0.457763	High across cell type family
ENSG00000006432	0.922341	0	0.0776591	High across cell type family
ENSG00000006451	0.804207	0.0351425	0.160651	High across cell type family
ENSG00000006453	0.102911	0.0197409	0.877348	None
ENSG00000006459	0.509321	0.173061	0.317618	High across cell type family
ENSG00000006468	0.708244	0.101932	0.189824	High across cell type family
ENSG00000006530	0	0.107138	0.892862	None
ENSG00000006534	0.899391	0.0714224	0.0291868	High across cell type family
ENSG00000006555	0.472743	0.17867	0.348588	High across cell type family
ENSG00000006576	0.935713	0	0.0642871	High across cell type family
ENSG00000006606	0.153068	0.093441	0.753491	None
ENSG00000006607	0	0	1	None
ENSG00000006611	0.970486	0	0.0295145	High across cell type family
ENSG00000006625	0	0	1	None
ENSG00000006634	0.387239	0	0.612761	High across cell type family
ENSG00000006638	0	0	1	None
ENSG00000006652	0.930271	0.0487571	0.0209718	High across cell type family
ENSG00000006659	0	0.108955	0.891045	None
ENSG00000006695	2.0604e-08	0	1	None
ENSG00000006704	0.298316	0.655509	0.0461747	Both to location and cell type
ENSG00000006712	0	0.295631	0.704369	High across location
ENSG00000006715	0	0	1	None
ENSG00000006740	0.970568	0.0133378	0.0160946	High across cell type family
ENSG00000006744	0.207929	3.49207e-07	0.79207	None
ENSG00000006747	0.0322557	0.182861	0.784883	None
ENSG00000006756	0.895471	1.3072e-11	0.104529	High across cell type family
ENSG00000006757	0.428568	0	0.571432	High across cell type family
ENSG00000006788	0.337301	0	0.662699	High across cell type family
ENSG00000006831	0	0	1	None
ENSG00000006837	0.939702	0.0464832	0.0138146	High across cell type family
ENSG00000007001	0.660364	0	0.339636	High across cell type family
ENSG00000007038	0	1.30204e-16	1	None
ENSG00000007047	0.618834	0.0206595	0.360506	High across cell type family
ENSG00000007062	0	0	1	None
ENSG00000007080	0.104474	0.255643	0.639883	High across location
ENSG00000007129	0.246258	0	0.753742	None
ENSG00000007168	0.863849	0.0368743	0.0992771	High across cell type family
ENSG00000007171	0.23862	0.199396	0.561984	None
ENSG00000007174	0	0.194543	0.805457	None
ENSG00000007202	0	0	1	None
ENSG00000007216	0	0.102651	0.897349	None
ENSG00000007237	0.181708	0	0.818292	None
ENSG00000007255	0.728989	0.0838539	0.187157	High across cell type family
ENSG00000007264	0.932875	0.0211149	0.0460097	High across cell type family
ENSG00000007306	0.917948	0.00743875	0.0746131	High across cell type family
ENSG00000007312	3.58302e-10	0.74291	0.25709	High across location
ENSG00000007314	0	0.800134	0.199866	High across location
ENSG00000007341	0.747834	0	0.252166	High across cell type family
ENSG00000007350	0	0.268848	0.731152	High across location
ENSG00000007372	0.971945	0.00917493	0.0188805	High across cell type family
ENSG00000007376	0	0	1	None
ENSG00000007384	0.967364	0.0259274	0.00670889	High across cell type family
ENSG00000007392	0.80461	5.08315e-10	0.19539	High across cell type family
ENSG00000007402	0.949413	0	0.0505873	High across cell type family
ENSG00000007516	4.76077e-09	0.000548686	0.999451	None
ENSG00000007520	0	0.0313492	0.968651	None
ENSG00000007541	0.611194	5.95168e-16	0.388806	High across cell type family
ENSG00000007545	0.0394758	0	0.960524	None
ENSG00000007866	0.99153	0.0065341	0.0019362	High across cell type family
ENSG00000007908	0	0	1	None
ENSG00000007923	0	0	1	None
ENSG00000007933	0.559413	0.0726371	0.36795	High across cell type family
ENSG00000007944	0.204528	0.0188566	0.776615	None
ENSG00000007952	0.280461	0.376227	0.343312	Both to location and cell type
ENSG00000007968	0.654601	0	0.345399	High across cell type family
ENSG00000008018	0.296082	0	0.703918	High across cell type family
ENSG00000008056	0.965354	0.00528631	0.0293602	High across cell type family
ENSG00000008083	0.734506	0.0532796	0.212215	High across cell type family
ENSG00000008086	0.606042	0.337804	0.0561533	Both to location and cell type
ENSG00000008118	0.888194	0.0483418	0.0634643	High across cell type family
ENSG00000008128	0.842266	0.0989553	0.0587789	High across cell type family
ENSG00000008130	0.467749	0	0.532251	High across cell type family
ENSG00000008196	0	0.447938	0.552062	High across location
ENSG00000008197	0.782194	0.0208932	0.196913	High across cell type family
ENSG00000008226	0.811319	0.0466996	0.141981	High across cell type family
ENSG00000008256	0.486247	0	0.513753	High across cell type family
ENSG00000008277	0.311089	0.355978	0.332933	Both to location and cell type
ENSG00000008282	0.86965	0.015719	0.114631	High across cell type family
ENSG00000008283	0.88279	0	0.11721	High across cell type family
ENSG00000008294	0.988475	1.84686e-12	0.0115248	High across cell type family
ENSG00000008300	0.994346	0	0.00565352	High across cell type family
ENSG00000008311	0.934165	0	0.0658346	High across cell type family
ENSG00000008323	0.388215	0.0307418	0.581043	High across cell type family
ENSG00000008324	0.794345	0	0.205655	High across cell type family
ENSG00000008382	0.695148	0.138713	0.166139	High across cell type family
ENSG00000008394	0.899178	0.0136314	0.0871911	High across cell type family
ENSG00000008405	0.548423	0.150266	0.301311	High across cell type family
ENSG00000008438	0.892463	0	0.107537	High across cell type family
ENSG00000008441	0.744927	0	0.255073	High across cell type family
ENSG00000008513	0.738556	0.235662	0.0257818	High across cell type family
ENSG00000008516	0.819904	0	0.180096	High across cell type family
ENSG00000008517	0.334206	0	0.665794	High across cell type family
ENSG00000008710	4.72962e-09	0.0108437	0.989156	None
ENSG00000008735	0.964004	0.0235707	0.0124249	High across cell type family
ENSG00000008838	0.609135	0	0.390865	High across cell type family
ENSG00000008853	0.506073	0	0.493927	High across cell type family
ENSG00000008869	0.886162	0.0573258	0.0565127	High across cell type family
ENSG00000008952	0.720844	0	0.279156	High across cell type family
ENSG00000008988	0.105527	0.357619	0.536854	High across location
ENSG00000009307	0.879402	0	0.120598	High across cell type family
ENSG00000009335	0.639394	0.0306853	0.329921	High across cell type family
ENSG00000009413	0.866411	1.74225e-15	0.133589	High across cell type family
ENSG00000009694	0.478944	0.353489	0.167567	Both to location and cell type
ENSG00000009709	0.0269008	0.859006	0.114093	High across location
ENSG00000009724	0	0	1	None
ENSG00000009765	0.200802	0.125863	0.673335	None
ENSG00000009780	0.179101	0.176977	0.643922	None
ENSG00000009790	0	0.510959	0.489041	High across location
ENSG00000009830	0.949178	1.28523e-10	0.050822	High across cell type family
ENSG00000009844	0.801929	0.0405083	0.157563	High across cell type family
ENSG00000009950	0.931336	0.0225323	0.046132	High across cell type family
ENSG00000009954	0.838542	0.0847888	0.0766695	High across cell type family
ENSG00000010017	0	0.56969	0.43031	High across location
ENSG00000010030	0	0.742149	0.257851	High across location
ENSG00000010072	0	0.573832	0.426168	High across location
ENSG00000010165	0.854162	0	0.145838	High across cell type family
ENSG00000010219	0.651418	0.143826	0.204756	High across cell type family
ENSG00000010244	0.143648	0	0.856352	None
ENSG00000010256	0.710417	0.162218	0.127366	High across cell type family
ENSG00000010270	0.580937	0.0468475	0.372215	High across cell type family
ENSG00000010278	0.998423	4.38261e-17	0.00157724	High across cell type family
ENSG00000010282	0.950691	0.00257449	0.0467345	High across cell type family
ENSG00000010292	0.596502	1.04452e-10	0.403498	High across cell type family
ENSG00000010295	0.114846	0	0.885154	None
ENSG00000010310	0.0621166	9.8798e-16	0.937883	None
ENSG00000010318	0.68303	0	0.31697	High across cell type family
ENSG00000010319	0	0.0818134	0.918187	None
ENSG00000010322	0.385847	0.212336	0.401817	High across cell type family
ENSG00000010327	0.619702	0.0028008	0.377497	High across cell type family
ENSG00000010361	0.930197	0.0524038	0.0173995	High across cell type family
ENSG00000010379	0.337265	2.25175e-10	0.662735	High across cell type family
ENSG00000010404	0.982063	0.00506943	0.0128671	High across cell type family
ENSG00000010438	0.938932	0.0220095	0.0390586	High across cell type family
ENSG00000010539	0	0	1	None
ENSG00000010610	0	0	1	None
ENSG00000010626	0.838309	0.0859072	0.0757834	High across cell type family
ENSG00000010671	0.848293	0.00454472	0.147162	High across cell type family
ENSG00000010704	0.994389	1.68715e-11	0.00561131	High across cell type family
ENSG00000010803	0.856008	6.5959e-11	0.143992	High across cell type family
ENSG00000010810	0.959969	0	0.040031	High across cell type family
ENSG00000010818	0.884748	0.0683406	0.0469111	High across cell type family
ENSG00000010932	0.0984822	0	0.901518	None
ENSG00000011007	0	0	1	None
ENSG00000011009	4.00185e-10	0.265231	0.734769	High across location
ENSG00000011021	0.922316	8.72951e-11	0.0776837	High across cell type family
ENSG00000011028	0.951289	0	0.0487114	High across cell type family
ENSG00000011052	0.0269739	0.658905	0.314121	High across location
ENSG00000011083	0.849966	0	0.150034	High across cell type family
ENSG00000011105	0.218082	0.304317	0.477601	High across location
ENSG00000011114	0.648552	0	0.351448	High across cell type family
ENSG00000011132	0.858007	0.0244349	0.117558	High across cell type family
ENSG00000011143	0.971081	0.0165735	0.0123453	High across cell type family
ENSG00000011198	0.794825	0.0251462	0.180028	High across cell type family
ENSG00000011201	0.876807	0	0.123193	High across cell type family
ENSG00000011243	0.555126	0	0.444874	High across cell type family
ENSG00000011258	0.659208	8.79242e-10	0.340792	High across cell type family
ENSG00000011260	0.679058	6.10667e-11	0.320942	High across cell type family
ENSG00000011275	0	0	1	None
ENSG00000011295	0.189572	0	0.810428	None
ENSG00000011304	0.706963	0	0.293037	High across cell type family
ENSG00000011332	0.8025	0.0894101	0.10809	High across cell type family
ENSG00000011347	0.959299	0.00722904	0.033472	High across cell type family
ENSG00000011376	0.181825	0	0.818175	None
ENSG00000011405	0.949001	0	0.0509991	High across cell type family
ENSG00000011422	2.12922e-10	0.177931	0.822069	None
ENSG00000011426	0.32601	0	0.67399	High across cell type family
ENSG00000011451	0.903911	0.0335889	0.0625	High across cell type family
ENSG00000011454	0.301939	0.177765	0.520296	High across cell type family
ENSG00000011465	0.740201	0	0.259799	High across cell type family
ENSG00000011478	0.777204	0	0.222796	High across cell type family
ENSG00000011485	0.85458	0	0.14542	High across cell type family
ENSG00000011523	0.0318542	2.52201e-08	0.968146	None
ENSG00000011566	0.538236	0.0799934	0.381771	High across cell type family
ENSG00000011590	0	0.296597	0.703403	High across location
ENSG00000011600	0.952494	0	0.0475064	High across cell type family
ENSG00000011638	0.750023	1.5071e-18	0.249977	High across cell type family
ENSG00000011677	0.948463	7.73294e-12	0.051537	High across cell type family
ENSG00000012048	0.871742	0	0.128258	High across cell type family
ENSG00000012061	0.773488	0.2092	0.0173123	High across cell type family
ENSG00000012124	0.807923	0.0318319	0.160245	High across cell type family
ENSG00000012171	0.989656	0.00359167	0.0067525	High across cell type family
ENSG00000012174	0	0.0423336	0.957666	None
ENSG00000012211	0.967156	0.00283984	0.0300047	High across cell type family
ENSG00000012223	0.958013	0.00723491	0.034752	High across cell type family
ENSG00000012232	0.723378	0.0122195	0.264402	High across cell type family
ENSG00000012504	1.73425e-09	0.717943	0.282057	High across location
ENSG00000012660	0.300157	0.148981	0.550862	High across cell type family
ENSG00000012779	0.00802164	0	0.991978	None
ENSG00000012817	0	0.164812	0.835188	None
ENSG00000012822	0.50153	1.23641e-09	0.49847	High across cell type family
ENSG00000012963	0	0	1	None
ENSG00000012983	0.910161	0.0418687	0.0479708	High across cell type family
ENSG00000013016	0.816889	0.0964387	0.0866722	High across cell type family
ENSG00000013275	0.406142	0.347146	0.246712	Both to location and cell type
ENSG00000013288	0.544843	0	0.455157	High across cell type family
ENSG00000013293	0.895889	0.00245356	0.101657	High across cell type family
ENSG00000013297	0.754158	0	0.245842	High across cell type family
ENSG00000013306	0.429147	0	0.570853	High across cell type family
ENSG00000013364	0.971283	0.00842741	0.0202893	High across cell type family
ENSG00000013374	0.169538	0.10423	0.726233	None
ENSG00000013375	0.921819	0	0.0781814	High across cell type family
ENSG00000013392	0.92895	0.0370467	0.0340031	High across cell type family
ENSG00000013441	0.979445	0.0125156	0.00803986	High across cell type family
ENSG00000013503	0.690035	0.236393	0.0735718	High across cell type family
ENSG00000013523	0.737621	0.0110204	0.251359	High across cell type family
ENSG00000013561	0.694618	0	0.305382	High across cell type family
ENSG00000013563	0	0	1	None
ENSG00000013573	0.183714	0	0.816286	None
ENSG00000013583	0	0.729253	0.270747	High across location
ENSG00000013588	0	0	1	None
ENSG00000013619	0.829388	0	0.170612	High across cell type family
ENSG00000013725	0.0483572	0	0.951643	None
ENSG00000013810	0	0	1	None
ENSG00000014123	0.70978	0	0.29022	High across cell type family
ENSG00000014138	0.0291247	0	0.970875	None
ENSG00000014164	0.821546	0.047298	0.131156	High across cell type family
ENSG00000014216	0.896554	0.0164441	0.0870014	High across cell type family
ENSG00000014257	0.257505	0.202183	0.540312	High across cell type family
ENSG00000014641	0.966919	3.65678e-12	0.0330811	High across cell type family
ENSG00000014824	0	0	1	None
ENSG00000014914	0.833922	0	0.166078	High across cell type family
ENSG00000014919	0.571024	0	0.428976	High across cell type family
ENSG00000015133	0.317198	0.21286	0.469942	High across cell type family
ENSG00000015153	0.650432	0.306703	0.0428646	Both to location and cell type
ENSG00000015171	0.0204025	0.765248	0.21435	High across location
ENSG00000015285	0.916541	0	0.0834595	High across cell type family
ENSG00000015413	0.731229	0.00497169	0.263799	High across cell type family
ENSG00000015475	0.385865	2.34225e-10	0.614135	High across cell type family
ENSG00000015479	0.592517	0.0422735	0.36521	High across cell type family
ENSG00000015520	0	0.511422	0.488578	High across location
ENSG00000015532	0.953762	0.0368849	0.00935328	High across cell type family
ENSG00000015568	0.166942	0.174985	0.658073	None
ENSG00000015592	0.79561	0.0835875	0.120802	High across cell type family
ENSG00000015676	0	0.395887	0.604113	High across location
ENSG00000016082	0.511941	0	0.488059	High across cell type family
ENSG00000016391	0.311401	0	0.688599	High across cell type family
ENSG00000016402	0.973353	0	0.0266467	High across cell type family
ENSG00000016490	0.29224	0.449225	0.258535	Both to location and cell type
ENSG00000016602	3.5891e-10	0.141857	0.858143	None
ENSG00000016864	0.154424	0.626092	0.219484	High across location
ENSG00000017260	0.29131	0	0.70869	High across cell type family
ENSG00000017427	0.901852	0.00716177	0.090986	High across cell type family
ENSG00000017483	0.206032	0.0198849	0.774083	None
ENSG00000017797	0.726185	0.10071	0.173105	High across cell type family
ENSG00000018189	0.952396	0	0.0476038	High across cell type family
ENSG00000018236	0.828042	0	0.171958	High across cell type family
ENSG00000018280	0.79896	0.0720385	0.129001	High across cell type family
ENSG00000018408	0.986827	0	0.0131725	High across cell type family
ENSG00000018510	0.535657	0.0236547	0.440689	High across cell type family
ENSG00000018610	0.94985	0.00297117	0.0471786	High across cell type family
ENSG00000018625	0.997075	0.00118494	0.00174013	High across cell type family
ENSG00000018699	0	0.38036	0.61964	High across location
ENSG00000018869	0.874276	0	0.125724	High across cell type family
ENSG00000019102	0.780943	0.0226942	0.196363	High across cell type family
ENSG00000019144	0.979083	3.0483e-12	0.0209173	High across cell type family
ENSG00000019169	0.348801	0	0.651199	High across cell type family
ENSG00000019186	0.599287	0.243793	0.15692	High across cell type family
ENSG00000019485	0.776747	0	0.223253	High across cell type family
ENSG00000019505	0.911104	0	0.0888964	High across cell type family
ENSG00000019549	1.90267e-20	0	1	None
ENSG00000019582	0.652461	0.198933	0.148606	High across cell type family
ENSG00000019991	0.728102	0	0.271898	High across cell type family
ENSG00000019995	0.938097	0.0246188	0.0372846	High across cell type family
ENSG00000020129	0.900803	0.0525683	0.0466288	High across cell type family
ENSG00000020181	0.273995	0.0587047	0.6673	High across cell type family
ENSG00000020256	0.680631	1.76213e-18	0.319369	High across cell type family
ENSG00000020426	0.949615	0.0274413	0.0229434	High across cell type family
ENSG00000020577	0.945941	1.04615e-11	0.0540586	High across cell type family
ENSG00000020633	0.552908	0.15226	0.294832	High across cell type family
ENSG00000020922	0	0	1	None
ENSG00000021300	0.975841	2.42751e-10	0.0241586	High across cell type family
ENSG00000021355	0.671615	0.180827	0.147558	High across cell type family
ENSG00000021461	0.777903	0.134596	0.0875012	High across cell type family
ENSG00000021488	0.146915	0.51255	0.340535	High across location
ENSG00000021574	0.876317	0	0.123683	High across cell type family
ENSG00000021645	0.854736	0.0177951	0.127469	High across cell type family
ENSG00000021762	0.6556	0.233458	0.110942	High across cell type family
ENSG00000021776	0.899184	0.0486543	0.0521615	High across cell type family
ENSG00000021826	0.131921	0	0.868079	None
ENSG00000021852	0	0.20996	0.79004	None
ENSG00000022267	0.631714	0.339573	0.028713	Both to location and cell type
ENSG00000022277	0.714639	0.160532	0.124829	High across cell type family
ENSG00000022355	0.918192	0	0.081808	High across cell type family
ENSG00000022556	0.946214	0.00745869	0.0463277	High across cell type family
ENSG00000022567	0.69869	0.192271	0.109039	High across cell type family
ENSG00000022840	0.43578	0.113513	0.450707	High across cell type family
ENSG00000022976	0.875561	0	0.124439	High across cell type family
ENSG00000023041	0.486017	0.112215	0.401768	High across cell type family
ENSG00000023171	0	0	1	None
ENSG00000023191	0.688303	0.284641	0.0270565	Both to location and cell type
ENSG00000023228	0.743956	0	0.256044	High across cell type family
ENSG00000023287	0.631749	0	0.368251	High across cell type family
ENSG00000023318	0.404391	0	0.595609	High across cell type family
ENSG00000023330	0.763991	0.0908309	0.145178	High across cell type family
ENSG00000023445	0.691157	0.0721191	0.236724	High across cell type family
ENSG00000023516	0	0.0768609	0.923139	None
ENSG00000023572	0.814676	0	0.185324	High across cell type family
ENSG00000023608	0.687556	0	0.312444	High across cell type family
ENSG00000023697	0.963882	0	0.0361185	High across cell type family
ENSG00000023734	0.900409	1.67099e-09	0.0995906	High across cell type family
ENSG00000023839	0.540265	1.40794e-09	0.459735	High across cell type family
ENSG00000023892	0	0	1	None
ENSG00000023902	0	0.652903	0.347097	High across location
ENSG00000023909	0.757428	1.98915e-16	0.242572	High across cell type family
ENSG00000024048	0.384317	0	0.615683	High across cell type family
ENSG00000024422	0.989033	0.00397761	0.0069893	High across cell type family
ENSG00000024526	0.472046	0.0572363	0.470718	High across cell type family
ENSG00000024862	0.852578	0.0770724	0.0703497	High across cell type family
ENSG00000025039	0.957937	0	0.042063	High across cell type family
ENSG00000025156	0.905208	0.0172312	0.0775605	High across cell type family
ENSG00000025293	0	0.56391	0.43609	High across location
ENSG00000025423	0.948271	0.0126771	0.0390515	High across cell type family
ENSG00000025434	0.439956	0.369945	0.190099	Both to location and cell type
ENSG00000025708	0	0	1	None
ENSG00000025770	0.881446	0.0270277	0.0915263	High across cell type family
ENSG00000025772	0.291863	0.381792	0.326344	Both to location and cell type
ENSG00000025796	0	0.224923	0.775077	None
ENSG00000025800	0.398762	0	0.601238	High across cell type family
ENSG00000026025	0.91436	0.0288038	0.0568364	High across cell type family
ENSG00000026036	0	0	1	None
ENSG00000026103	0.971951	1.6814e-17	0.0280487	High across cell type family
ENSG00000026297	0	0.886286	0.113714	High across location
ENSG00000026508	0.98067	0.00652223	0.0128079	High across cell type family
ENSG00000026559	0.739076	0.0672433	0.193681	High across cell type family
ENSG00000026652	0.895922	2.22686e-10	0.104078	High across cell type family
ENSG00000026751	0	0.150207	0.849793	None
ENSG00000026950	0	0	1	None
ENSG00000027001	0.657835	0	0.342165	High across cell type family
ENSG00000027075	0	0	1	None
ENSG00000027644	0.42419	0.363484	0.212326	Both to location and cell type
ENSG00000027697	1.77891e-10	0.111142	0.888858	None
ENSG00000027847	0.843414	0	0.156586	High across cell type family
ENSG00000027869	4.17442e-11	0.855843	0.144157	High across location
ENSG00000028116	0.912066	0	0.0879341	High across cell type family
ENSG00000028137	0.556742	0.204421	0.238837	High across cell type family
ENSG00000028203	0.774324	0.0249088	0.200767	High across cell type family
ENSG00000028277	0.976925	0	0.0230749	High across cell type family
ENSG00000028310	0	0.137678	0.862322	None
ENSG00000028528	0.602118	0.149602	0.248281	High across cell type family
ENSG00000028839	0.883145	0	0.116855	High across cell type family
ENSG00000029153	0.302781	1.7814e-09	0.697219	High across cell type family
ENSG00000029363	0.793535	0.0103446	0.196121	High across cell type family
ENSG00000029364	0.106589	0	0.893411	None
ENSG00000029534	0.981853	0.00755759	0.0105899	High across cell type family
ENSG00000029559	0	0	1	None
ENSG00000029639	0.279244	0	0.720756	High across cell type family
ENSG00000029725	0.670265	0.131428	0.198306	High across cell type family
ENSG00000029993	0.189506	0.197751	0.612743	None
ENSG00000030066	0.66269	0.178875	0.158435	High across cell type family
ENSG00000030110	0.105275	0	0.894725	None
ENSG00000030304	0.806164	0.108207	0.0856287	High across cell type family
ENSG00000030419	0.933615	3.22144e-11	0.066385	High across cell type family
ENSG00000030582	0.909763	1.26673e-11	0.090237	High across cell type family
ENSG00000031003	0.968172	0.01236	0.0194678	High across cell type family
ENSG00000031081	0.953356	6.73622e-08	0.0466436	High across cell type family
ENSG00000031691	0.559481	0.363805	0.0767138	Both to location and cell type
ENSG00000031698	0.885058	0.0333097	0.0816319	High across cell type family
ENSG00000031823	0.341568	0	0.658432	High across cell type family
ENSG00000032219	0.74242	0.00165205	0.255928	High across cell type family
ENSG00000032389	0.509752	2.49507e-10	0.490248	High across cell type family
ENSG00000032444	0.665495	4.88153e-11	0.334505	High across cell type family
ENSG00000032742	0.880914	0.00664551	0.11244	High across cell type family
ENSG00000033011	0.796183	0.0165896	0.187227	High across cell type family
ENSG00000033030	0.903132	0.0097404	0.0871275	High across cell type family
ENSG00000033050	0	0	1	None
ENSG00000033100	0.571437	0.338624	0.0899392	Both to location and cell type
ENSG00000033122	0.845469	0.0157095	0.138822	High across cell type family
ENSG00000033170	0	0	1	None
ENSG00000033178	0.060379	0.585269	0.354352	High across location
ENSG00000033327	0.889994	0	0.110006	High across cell type family
ENSG00000033627	0.936427	0.0450169	0.0185561	High across cell type family
ENSG00000033800	0	0.147663	0.852337	None
ENSG00000033867	0.967128	0.0236841	0.0091883	High across cell type family
ENSG00000034053	0.79715	0	0.20285	High across cell type family
ENSG00000034152	0	0	1	None
ENSG00000034239	0.624213	0.182691	0.193095	High across cell type family
ENSG00000034510	0.481166	0	0.518834	High across cell type family
ENSG00000034533	0.509876	0	0.490124	High across cell type family
ENSG00000034677	0.952686	0	0.0473139	High across cell type family
ENSG00000034693	0.86829	3.80528e-11	0.13171	High across cell type family
ENSG00000034713	0.243809	0.0109426	0.745248	None
ENSG00000034971	9.03425e-17	0.0505161	0.949484	None
ENSG00000035115	0.0884543	0	0.911546	None
ENSG00000035141	0.515016	0.374177	0.110807	Both to location and cell type
ENSG00000035403	0.699494	0.0575734	0.242933	High across cell type family
ENSG00000035499	0.906741	0	0.0932586	High across cell type family
ENSG00000035664	0.885647	0.0476573	0.0666955	High across cell type family
ENSG00000035681	0	0.0201199	0.97988	None
ENSG00000035687	0.802589	0.138375	0.0590359	High across cell type family
ENSG00000035720	0	0.742305	0.257695	High across location
ENSG00000035862	0.882954	9.82185e-11	0.117046	High across cell type family
ENSG00000035928	0.647591	0.0512436	0.301166	High across cell type family
ENSG00000036054	0.198294	0.321977	0.479729	High across location
ENSG00000036257	0.304627	1.9898e-06	0.695371	High across cell type family
ENSG00000036448	0.937605	0	0.0623954	High across cell type family
ENSG00000036473	0.0662593	0	0.933741	None
ENSG00000036530	0.00847958	0.949918	0.0416028	High across location
ENSG00000036549	0.421329	0.477462	0.101209	Both to location and cell type
ENSG00000036565	0.775596	0.0403798	0.184024	High across cell type family
ENSG00000036672	0.624562	5.86661e-18	0.375438	High across cell type family
ENSG00000036828	0.521851	0.126825	0.351323	High across cell type family
ENSG00000037042	0.241097	0	0.758903	None
ENSG00000037241	0.310156	0.16962	0.520224	High across cell type family
ENSG00000037280	0.413436	0.42077	0.165794	Both to location and cell type
ENSG00000037474	0.649364	0	0.350636	High across cell type family
ENSG00000037637	0	0.196022	0.803978	None
ENSG00000037749	0	0.528978	0.471022	High across location
ENSG00000037757	0.357457	0	0.642543	High across cell type family
ENSG00000037897	0.342525	0.0350905	0.622384	High across cell type family
ENSG00000038002	0.952072	0	0.0479281	High across cell type family
ENSG00000038210	0.900184	0.0236913	0.0761251	High across cell type family
ENSG00000038219	0.927374	0	0.072626	High across cell type family
ENSG00000038274	0.732603	0	0.267397	High across cell type family
ENSG00000038295	0.784617	0.0604764	0.154906	High across cell type family
ENSG00000038358	0	0	1	None
ENSG00000038382	0	0	1	None
ENSG00000038427	0.465417	0.028331	0.506252	High across cell type family
ENSG00000038532	0.849276	0	0.150724	High across cell type family
ENSG00000038945	0.0492577	0.0134081	0.937334	None
ENSG00000039068	0.415513	0.277988	0.306499	Both to location and cell type
ENSG00000039123	0.619419	0	0.380581	High across cell type family
ENSG00000039139	0.770596	7.18576e-11	0.229404	High across cell type family
ENSG00000039319	0	1.95594e-17	1	None
ENSG00000039523	0.797754	0	0.202246	High across cell type family
ENSG00000039537	0.523698	0.458579	0.0177236	Both to location and cell type
ENSG00000039560	0	0.115352	0.884648	None
ENSG00000039600	0.79074	0.0969872	0.112273	High across cell type family
ENSG00000039650	0.937223	0	0.0627769	High across cell type family
ENSG00000039987	0	0	1	None
ENSG00000040199	0.282556	0.186311	0.531133	High across cell type family
ENSG00000040275	0.480498	0.021991	0.497511	High across cell type family
ENSG00000040341	0.477713	0	0.522287	High across cell type family
ENSG00000040487	0.157773	0.651212	0.191015	High across location
ENSG00000040531	0.971151	0	0.0288494	High across cell type family
ENSG00000040608	0	0.581762	0.418238	High across location
ENSG00000040633	0	0	1	None
ENSG00000040731	0	0	1	None
ENSG00000040933	0.244723	0.186698	0.568579	None
ENSG00000041353	0.928362	0	0.0716384	High across cell type family
ENSG00000041357	0.563256	0.0672009	0.369543	High across cell type family
ENSG00000041515	0.547965	0.200384	0.25165	High across cell type family
ENSG00000041802	0.824868	0.0777503	0.0973822	High across cell type family
ENSG00000041880	0.957089	0	0.0429105	High across cell type family
ENSG00000041982	0.970349	0	0.0296507	High across cell type family
ENSG00000041988	0.477963	0.329648	0.192389	Both to location and cell type
ENSG00000042062	0.53737	2.73917e-10	0.46263	High across cell type family
ENSG00000042088	0.935868	2.20671e-17	0.0641322	High across cell type family
ENSG00000042286	0	0	1	None
ENSG00000042317	0.518094	0	0.481906	High across cell type family
ENSG00000042429	0.616146	0.27471	0.109144	Both to location and cell type
ENSG00000042445	0.798737	0.182363	0.0188994	High across cell type family
ENSG00000042493	0.965554	0	0.0344461	High across cell type family
ENSG00000042753	0.628901	0	0.371099	High across cell type family
ENSG00000042781	0.427304	0.14066	0.432036	High across cell type family
ENSG00000042813	0.718713	0	0.281287	High across cell type family
ENSG00000042832	0.837556	0	0.162444	High across cell type family
ENSG00000042980	0.839645	0	0.160355	High across cell type family
ENSG00000043039	0.952345	0	0.0476545	High across cell type family
ENSG00000043093	0.851397	0	0.148603	High across cell type family
ENSG00000043143	0.812669	0	0.187331	High across cell type family
ENSG00000043355	0	0	1	None
ENSG00000043462	0	0	1	None
ENSG00000043514	0.542138	0.215069	0.242793	High across cell type family
ENSG00000043591	0.799723	0	0.200277	High across cell type family
ENSG00000044090	0.299404	0.014171	0.686425	High across cell type family
ENSG00000044115	0.798053	0.0399285	0.162018	High across cell type family
ENSG00000044446	0.919224	1.8577e-10	0.0807763	High across cell type family
ENSG00000044459	0.884608	0.0485286	0.066863	High across cell type family
ENSG00000044524	0.901973	0.0677965	0.0302302	High across cell type family
ENSG00000044574	0.0715565	0.44447	0.483973	High across location
ENSG00000046604	0	0.414974	0.585026	High across location
ENSG00000046647	0.971369	0.0222439	0.00638672	High across cell type family
ENSG00000046651	0.890658	2.13478e-11	0.109342	High across cell type family
ENSG00000046653	0.93172	0.0268381	0.0414415	High across cell type family
ENSG00000046889	0.922989	0.0407706	0.0362409	High across cell type family
ENSG00000047056	0.44928	0	0.55072	High across cell type family
ENSG00000047188	0.946339	2.33956e-10	0.0536609	High across cell type family
ENSG00000047230	0.752686	0.0448938	0.20242	High across cell type family
ENSG00000047249	0.0429117	0.570693	0.386395	High across location
ENSG00000047315	0.0898322	0	0.910168	None
ENSG00000047346	0.687177	0.0671824	0.245641	High across cell type family
ENSG00000047365	0.84646	0.0211338	0.132407	High across cell type family
ENSG00000047410	0.0267394	0.270646	0.702614	High across location
ENSG00000047457	0.931051	0.0342332	0.0347157	High across cell type family
ENSG00000047578	0.942223	1.54122e-10	0.0577772	High across cell type family
ENSG00000047579	0	0.376045	0.623955	High across location
ENSG00000047597	0.843213	0	0.156787	High across cell type family
ENSG00000047617	0.669021	0	0.330979	High across cell type family
ENSG00000047621	1.34261e-05	0.611125	0.388861	High across location
ENSG00000047634	0	0	1	None
ENSG00000047644	0.881157	1.35424e-11	0.118843	High across cell type family
ENSG00000047648	0	0.539842	0.460158	High across location
ENSG00000047662	0.758273	0.0100197	0.231707	High across cell type family
ENSG00000047849	0.88954	0.0299109	0.0805491	High across cell type family
ENSG00000047932	0.2827	1.41706e-10	0.7173	High across cell type family
ENSG00000047936	0	0.283127	0.716873	High across location
ENSG00000048028	0.428976	0	0.571024	High across cell type family
ENSG00000048052	0.956054	0.0109786	0.0329674	High across cell type family
ENSG00000048140	0.275885	0	0.724115	High across cell type family
ENSG00000048162	0.59354	0.344904	0.0615564	Both to location and cell type
ENSG00000048342	0.966997	0.00458708	0.0284162	High across cell type family
ENSG00000048392	0.375375	0.393822	0.230802	Both to location and cell type
ENSG00000048405	0	0.0214208	0.978579	None
ENSG00000048462	0	0	1	None
ENSG00000048471	0.859262	0	0.140738	High across cell type family
ENSG00000048540	0.667302	0.0284454	0.304252	High across cell type family
ENSG00000048544	0.156558	0.689526	0.153916	High across location
ENSG00000048545	0.86844	0.0640097	0.0675498	High across cell type family
ENSG00000048649	0.089561	0.0495073	0.860932	None
ENSG00000048707	0.659454	0	0.340546	High across cell type family
ENSG00000048740	0	0.269189	0.730811	High across location
ENSG00000048828	0.533558	0.0955382	0.370903	High across cell type family
ENSG00000048991	0.791344	0.0711774	0.137478	High across cell type family
ENSG00000049089	0.975281	0	0.0247188	High across cell type family
ENSG00000049130	0.102983	0.600279	0.296738	High across location
ENSG00000049167	0	0.177539	0.822461	None
ENSG00000049192	0.508149	0	0.491851	High across cell type family
ENSG00000049239	0.916067	0.0147231	0.0692096	High across cell type family
ENSG00000049245	0.765601	0	0.234399	High across cell type family
ENSG00000049246	0.961091	3.98727e-11	0.0389088	High across cell type family
ENSG00000049247	0	0	1	None
ENSG00000049249	0.145835	0.519795	0.33437	High across location
ENSG00000049283	0.0132024	0	0.986798	None
ENSG00000049323	0.604979	0	0.395021	High across cell type family
ENSG00000049449	0	0	1	None
ENSG00000049540	0.944541	0.00638183	0.049077	High across cell type family
ENSG00000049541	0	0.21996	0.78004	None
ENSG00000049618	0.272539	0	0.727461	High across cell type family
ENSG00000049656	0.914952	0.0512667	0.0337815	High across cell type family
ENSG00000049759	1.17994e-09	0.686989	0.313011	High across location
ENSG00000049768	0.240548	0	0.759452	None
ENSG00000049769	0.978634	0	0.0213661	High across cell type family
ENSG00000049860	0.900019	0	0.0999813	High across cell type family
ENSG00000049883	0.907666	0	0.0923342	High across cell type family
ENSG00000050030	0.898407	0.00236231	0.099231	High across cell type family
ENSG00000050130	0	0.7485	0.2515	High across location
ENSG00000050165	0.482604	0.370245	0.147152	Both to location and cell type
ENSG00000050327	0.387547	0.477985	0.134468	Both to location and cell type
ENSG00000050344	0.764474	0	0.235526	High across cell type family
ENSG00000050393	0.743144	0.077716	0.17914	High across cell type family
ENSG00000050405	0	0.39784	0.60216	High across location
ENSG00000050426	0.962945	1.48005e-10	0.0370553	High across cell type family
ENSG00000050438	0.569082	0.141732	0.289186	High across cell type family
ENSG00000050555	0.247615	0.444376	0.308009	High across location
ENSG00000050628	0.667063	0.0739969	0.25894	High across cell type family
ENSG00000050730	0.728946	0.0146906	0.256363	High across cell type family
ENSG00000050748	0.852529	0	0.147471	High across cell type family
ENSG00000050767	0.726709	0.223879	0.0494116	High across cell type family
ENSG00000050820	0.330623	0.313574	0.355802	Both to location and cell type
ENSG00000051009	0.922509	0.0483535	0.0291376	High across cell type family
ENSG00000051108	0.663819	0.0583691	0.277812	High across cell type family
ENSG00000051128	0.178319	0.201783	0.619898	None
ENSG00000051180	0	0	1	None
ENSG00000051341	0.980141	0.00484926	0.0150094	High across cell type family
ENSG00000051382	0.313266	0.351254	0.33548	Both to location and cell type
ENSG00000051523	0.793873	0	0.206127	High across cell type family
ENSG00000051596	0.821532	0	0.178468	High across cell type family
ENSG00000051620	0.611697	0.0324056	0.355898	High across cell type family
ENSG00000051825	0.766654	4.20854e-11	0.233346	High across cell type family
ENSG00000052126	5.45355e-09	0.0527426	0.947257	None
ENSG00000052344	0.413508	0	0.586492	High across cell type family
ENSG00000052723	0.702738	0.0449362	0.252326	High across cell type family
ENSG00000052749	0	0	1	None
ENSG00000052795	0.866341	0.0693901	0.0642684	High across cell type family
ENSG00000052802	0	0	1	None
ENSG00000052841	0.72432	0	0.27568	High across cell type family
ENSG00000052850	0	0	1	None
ENSG00000053108	0.764234	0	0.235766	High across cell type family
ENSG00000053254	0.945744	2.06107e-10	0.0542563	High across cell type family
ENSG00000053328	0	0	1	None
ENSG00000053371	0.923385	0.0572883	0.019327	High across cell type family
ENSG00000053372	0	0.187621	0.812379	None
ENSG00000053438	0.868659	0.117786	0.0135549	High across cell type family
ENSG00000053501	0.694084	0.0529673	0.252948	High across cell type family
ENSG00000053524	0.794127	0.0582245	0.147649	High across cell type family
ENSG00000053702	0.441387	0	0.558613	High across cell type family
ENSG00000053747	1.29884e-09	0.70569	0.29431	High across location
ENSG00000053770	0.87155	0	0.12845	High across cell type family
ENSG00000053900	0.295232	0.432304	0.272464	Both to location and cell type
ENSG00000053918	0.923419	0.0674609	0.00911991	High across cell type family
ENSG00000054116	0.0684913	0.686421	0.245087	High across location
ENSG00000054118	0	0	1	None
ENSG00000054148	0	0.109127	0.890873	None
ENSG00000054179	0.979822	0	0.0201775	High across cell type family
ENSG00000054219	0	0.150207	0.849793	None
ENSG00000054267	0.671431	0	0.328569	High across cell type family
ENSG00000054277	0	0	1	None
ENSG00000054282	0.853249	0.0233348	0.123417	High across cell type family
ENSG00000054356	0.964512	0.00904237	0.0264456	High across cell type family
ENSG00000054392	0.699827	0	0.300173	High across cell type family
ENSG00000054523	0.981017	0	0.0189833	High across cell type family
ENSG00000054598	0.55776	0	0.44224	High across cell type family
ENSG00000054611	0.685377	0.00533921	0.309283	High across cell type family
ENSG00000054654	0.435829	0	0.564171	High across cell type family
ENSG00000054690	0	0.424014	0.575986	High across location
ENSG00000054793	0.493165	0.0727142	0.434121	High across cell type family
ENSG00000054796	0	0.0775099	0.92249	None
ENSG00000054803	0.90936	0.0804295	0.0102101	High across cell type family
ENSG00000054938	0	0	1	None
ENSG00000054965	0.339729	0	0.660271	High across cell type family
ENSG00000054967	0.242387	2.65999e-10	0.757613	None
ENSG00000054983	0.800404	0.0113441	0.188252	High across cell type family
ENSG00000055044	0.963336	0.0111597	0.0255043	High across cell type family
ENSG00000055070	0.92544	0.064942	0.00961825	High across cell type family
ENSG00000055118	0.938625	0.0585347	0.00283997	High across cell type family
ENSG00000055130	0.811024	4.70013e-16	0.188976	High across cell type family
ENSG00000055147	0	0	1	None
ENSG00000055163	0	0.54877	0.45123	High across location
ENSG00000055208	0.967771	0.0141797	0.0180491	High across cell type family
ENSG00000055211	0.924951	0	0.0750485	High across cell type family
ENSG00000055332	0.0612453	0	0.938755	None
ENSG00000055483	0.547327	0	0.452673	High across cell type family
ENSG00000055609	0.954757	0.0122132	0.0330298	High across cell type family
ENSG00000055732	0.128333	0.435442	0.436225	High across location
ENSG00000055813	0	0.541948	0.458052	High across location
ENSG00000055917	0.690067	0	0.309933	High across cell type family
ENSG00000055950	9.75799e-10	0.296715	0.703285	High across location
ENSG00000055955	0.856342	0	0.143658	High across cell type family
ENSG00000055957	2.46486e-10	0.0693468	0.930653	None
ENSG00000056050	0.716044	0	0.283956	High across cell type family
ENSG00000056097	0.011015	2.78278e-09	0.988985	None
ENSG00000056277	0.428571	0	0.571429	High across cell type family
ENSG00000056291	0.71499	0.0835883	0.201421	High across cell type family
ENSG00000056487	0.96429	0	0.0357098	High across cell type family
ENSG00000056558	0.950485	0	0.0495154	High across cell type family
ENSG00000056586	0	0	1	None
ENSG00000056736	0.929271	0.00458436	0.0661446	High across cell type family
ENSG00000056972	0.847862	0.0522278	0.0999101	High across cell type family
ENSG00000056998	0.824921	0.141884	0.0331943	High across cell type family
ENSG00000057019	0	0.42452	0.57548	High across location
ENSG00000057149	2.88887e-09	0.184958	0.815042	None
ENSG00000057252	0.348205	0	0.651795	High across cell type family
ENSG00000057294	0	0.21291	0.78709	None
ENSG00000057468	0.966563	3.90174e-11	0.0334375	High across cell type family
ENSG00000057593	0.669202	0.176522	0.154277	High across cell type family
ENSG00000057608	0.40273	0	0.59727	High across cell type family
ENSG00000057657	0.123143	0.258021	0.618836	High across location
ENSG00000057663	0.864784	0.127874	0.00734283	High across cell type family
ENSG00000057704	0	0.0645217	0.935478	None
ENSG00000057757	0.901622	0	0.0983775	High across cell type family
ENSG00000057935	0.151833	0	0.848167	None
ENSG00000058056	0.685929	0.0214951	0.292576	High across cell type family
ENSG00000058063	0.67031	0.00439207	0.325298	High across cell type family
ENSG00000058085	0.422193	0	0.577807	High across cell type family
ENSG00000058091	0.397762	0.189879	0.412359	High across cell type family
ENSG00000058262	0.908518	0	0.0914823	High across cell type family
ENSG00000058272	0.864343	0.0580654	0.0775914	High across cell type family
ENSG00000058335	0.932048	0.0593902	0.00856201	High across cell type family
ENSG00000058404	0.777733	0	0.222267	High across cell type family
ENSG00000058453	0.444785	0.199808	0.355407	High across cell type family
ENSG00000058600	0.336708	0	0.663292	High across cell type family
ENSG00000058668	0.54652	0.143593	0.309887	High across cell type family
ENSG00000058673	0.832146	0.0746789	0.0931754	High across cell type family
ENSG00000058729	0.624985	0	0.375015	High across cell type family
ENSG00000058799	0.889788	4.68285e-09	0.110212	High across cell type family
ENSG00000058804	0.379598	0.553146	0.0672561	Both to location and cell type
ENSG00000058866	0.79169	8.27224e-05	0.208228	High across cell type family
ENSG00000059122	0.652996	0	0.347004	High across cell type family
ENSG00000059145	0.860228	0.112763	0.0270091	High across cell type family
ENSG00000059377	0.737897	0	0.262103	High across cell type family
ENSG00000059378	0.774518	0	0.225482	High across cell type family
ENSG00000059573	0.804326	0.0583035	0.137371	High across cell type family
ENSG00000059588	0.866596	9.57219e-11	0.133404	High across cell type family
ENSG00000059691	0.605912	0	0.394088	High across cell type family
ENSG00000059728	0	0	1	None
ENSG00000059758	0	0.275078	0.724922	High across location
ENSG00000059769	0.571539	0.168609	0.259852	High across cell type family
ENSG00000059804	0.959532	0.0367611	0.00370649	High across cell type family
ENSG00000059915	0.910455	0.0481438	0.0414011	High across cell type family
ENSG00000060069	1.11438e-09	0.346302	0.653698	High across location
ENSG00000060138	0.975394	0.0115895	0.0130166	High across cell type family
ENSG00000060140	0.592773	0.129426	0.277801	High across cell type family
ENSG00000060237	0.847498	0.128954	0.0235483	High across cell type family
ENSG00000060339	0.60719	0.214871	0.177939	High across cell type family
ENSG00000060491	0.558655	0.0930679	0.348277	High across cell type family
ENSG00000060558	0.60212	0	0.39788	High across cell type family
ENSG00000060566	0.688202	0.252698	0.0590998	Both to location and cell type
ENSG00000060642	0.918132	0	0.0818678	High across cell type family
ENSG00000060656	0.873435	0.121041	0.00552359	High across cell type family
ENSG00000060688	0.788269	0	0.211731	High across cell type family
ENSG00000060709	0.866245	0	0.133755	High across cell type family
ENSG00000060718	1.40119e-08	0.015284	0.984716	None
ENSG00000060749	0	0.470531	0.529469	High across location
ENSG00000060762	0.82831	0	0.17169	High across cell type family
ENSG00000060971	0.955009	0	0.0449907	High across cell type family
ENSG00000060982	0.973423	0.0197041	0.00687259	High across cell type family
ENSG00000061273	0.95419	0	0.0458096	High across cell type family
ENSG00000061337	0.588772	0.185252	0.225977	High across cell type family
ENSG00000061455	0.883948	0.0196883	0.0963641	High across cell type family
ENSG00000061492	0.808416	0	0.191584	High across cell type family
ENSG00000061656	0	0	1	None
ENSG00000061676	0.865925	0.125604	0.0084716	High across cell type family
ENSG00000061794	0.936126	0	0.0638737	High across cell type family
ENSG00000061918	0.938053	2.89912e-17	0.0619472	High across cell type family
ENSG00000061936	0.701965	0	0.298035	High across cell type family
ENSG00000061938	0.823175	0	0.176825	High across cell type family
ENSG00000061987	0.614172	0	0.385828	High across cell type family
ENSG00000062038	0.966715	0.00150794	0.031777	High across cell type family
ENSG00000062096	0.857435	0	0.142565	High across cell type family
ENSG00000062194	0.800474	0	0.199526	High across cell type family
ENSG00000062282	0.914297	0.0304023	0.0553011	High across cell type family
ENSG00000062370	0.639021	0.263307	0.0976722	Both to location and cell type
ENSG00000062485	0.80786	0.115785	0.0763546	High across cell type family
ENSG00000062524	5.19076e-08	0	1	None
ENSG00000062582	0.186323	0	0.813677	None
ENSG00000062598	0.497753	0.0117314	0.490515	High across cell type family
ENSG00000062650	0.812613	0.174004	0.0133837	High across cell type family
ENSG00000062716	0.927565	0	0.0724347	High across cell type family
ENSG00000062725	0	0.699525	0.300475	High across location
ENSG00000062822	0.617763	0	0.382237	High across cell type family
ENSG00000063015	0.931385	0.0245733	0.0440422	High across cell type family
ENSG00000063046	0.717669	5.70289e-16	0.282331	High across cell type family
ENSG00000063127	0.155966	0.395641	0.448393	High across location
ENSG00000063169	0	0.673324	0.326676	High across location
ENSG00000063176	0.835879	0.0550922	0.109029	High across cell type family
ENSG00000063177	0.522897	0.0791596	0.397943	High across cell type family
ENSG00000063180	0.835202	3.35139e-11	0.164798	High across cell type family
ENSG00000063241	0	0.0463929	0.953607	None
ENSG00000063244	0.809968	0.128584	0.0614478	High across cell type family
ENSG00000063245	0.584379	0	0.415621	High across cell type family
ENSG00000063322	0.51482	0.0965032	0.388676	High across cell type family
ENSG00000063438	0.733942	0	0.266058	High across cell type family
ENSG00000063587	0.34519	0.193099	0.461711	High across cell type family
ENSG00000063601	0.893653	0	0.106347	High across cell type family
ENSG00000063660	0.354129	0.420062	0.22581	Both to location and cell type
ENSG00000063761	0.249473	0	0.750527	None
ENSG00000063854	0.787215	0.115589	0.0971968	High across cell type family
ENSG00000063978	1.61169e-10	0.682605	0.317395	High across location
ENSG00000064012	0.0567133	0	0.943287	None
ENSG00000064042	0.353706	1.13752e-10	0.646294	High across cell type family
ENSG00000064102	0.756831	0	0.243169	High across cell type family
ENSG00000064115	1.37395e-17	0.108643	0.891357	None
ENSG00000064195	0	0.19929	0.80071	None
ENSG00000064199	0	0.0883874	0.911613	None
ENSG00000064201	0.939706	0.0227796	0.037514	High across cell type family
ENSG00000064205	0.511657	0.456345	0.0319979	Both to location and cell type
ENSG00000064218	0	0	1	None
ENSG00000064225	0	0.358952	0.641048	High across location
ENSG00000064270	0.751489	0.204693	0.0438179	High across cell type family
ENSG00000064300	0.211018	0.43419	0.354792	High across location
ENSG00000064309	0.841876	0.0212373	0.136887	High across cell type family
ENSG00000064313	0.826097	0	0.173903	High across cell type family
ENSG00000064393	0.600706	0	0.399294	High across cell type family
ENSG00000064419	0	0	1	None
ENSG00000064489	0.595759	0.394694	0.00954773	Both to location and cell type
ENSG00000064490	0.978057	0	0.0219431	High across cell type family
ENSG00000064545	0.327944	0	0.672056	High across cell type family
ENSG00000064547	0.794893	0.00744729	0.19766	High across cell type family
ENSG00000064601	0.326205	0.0290753	0.64472	High across cell type family
ENSG00000064607	0.20782	0.114506	0.677673	None
ENSG00000064651	0.886603	0.00584451	0.107553	High across cell type family
ENSG00000064652	0.541862	0	0.458138	High across cell type family
ENSG00000064655	0.96307	0	0.0369299	High across cell type family
ENSG00000064666	0.237937	0	0.762063	None
ENSG00000064687	0.70023	0	0.29977	High across cell type family
ENSG00000064692	0.483092	0.0277585	0.48915	High across cell type family
ENSG00000064703	0.0317129	0.47549	0.492797	High across location
ENSG00000064726	8.37193e-09	0.298983	0.701016	High across location
ENSG00000064763	0.659198	0.0249547	0.315847	High across cell type family
ENSG00000064787	0.71893	5.44565e-16	0.28107	High across cell type family
ENSG00000064835	0	0.0775099	0.92249	None
ENSG00000064886	0.867217	0	0.132783	High across cell type family
ENSG00000064932	0.876898	0	0.123102	High across cell type family
ENSG00000064933	0.223496	0.386661	0.389843	High across location
ENSG00000064961	0.98107	0	0.0189299	High across cell type family
ENSG00000064989	0.51608	0	0.48392	High across cell type family
ENSG00000064995	0.0507479	0.368476	0.580776	High across location
ENSG00000064999	0.104785	0	0.895215	None
ENSG00000065000	0.899019	0	0.100981	High across cell type family
ENSG00000065029	0.490687	2.16553e-10	0.509313	High across cell type family
ENSG00000065054	0.90132	1.29361e-11	0.0986802	High across cell type family
ENSG00000065057	0.474528	0.204935	0.320537	High across cell type family
ENSG00000065060	0.344358	0	0.655642	High across cell type family
ENSG00000065135	0.863834	0	0.136166	High across cell type family
ENSG00000065150	0	1.31826e-17	1	None
ENSG00000065154	0.93158	0	0.06842	High across cell type family
ENSG00000065183	0.902076	0	0.097924	High across cell type family
ENSG00000065243	0.572716	0.043539	0.383745	High across cell type family
ENSG00000065268	0	0.554329	0.445671	High across location
ENSG00000065308	9.37706e-11	0.456731	0.543269	High across location
ENSG00000065320	0.65416	0.0341468	0.311694	High across cell type family
ENSG00000065325	0	0	1	None
ENSG00000065328	0	0.430211	0.569789	High across location
ENSG00000065357	0	0.326713	0.673287	High across location
ENSG00000065361	0.673322	0.266921	0.059757	Both to location and cell type
ENSG00000065371	0.0181406	0	0.981859	None
ENSG00000065413	0.646675	0.17604	0.177285	High across cell type family
ENSG00000065427	0	0.27434	0.72566	High across location
ENSG00000065457	0	0	1	None
ENSG00000065485	0.251363	0	0.748637	High across cell type family
ENSG00000065491	0.520493	0	0.479507	High across cell type family
ENSG00000065518	0	0.18296	0.81704	None
ENSG00000065526	0.972344	7.23113e-11	0.027656	High across cell type family
ENSG00000065534	0.989451	2.98272e-11	0.0105489	High across cell type family
ENSG00000065548	0.877087	0	0.122913	High across cell type family
ENSG00000065559	0.900434	0.0409126	0.0586534	High across cell type family
ENSG00000065600	0.805727	0	0.194273	High across cell type family
ENSG00000065609	0.944158	0	0.0558415	High across cell type family
ENSG00000065613	1.37447e-10	0.150837	0.849163	None
ENSG00000065615	0	0	1	None
ENSG00000065618	0.801491	0.142213	0.056296	High across cell type family
ENSG00000065621	0.544384	0.210076	0.24554	High across cell type family
ENSG00000065665	0.328265	3.15032e-16	0.671735	High across cell type family
ENSG00000065675	0.794709	3.35393e-11	0.205291	High across cell type family
ENSG00000065717	0.885941	0	0.114059	High across cell type family
ENSG00000065802	0.666389	0.204112	0.129499	High across cell type family
ENSG00000065809	0.0296801	0.378049	0.592271	High across location
ENSG00000065833	0	0	1	None
ENSG00000065882	0.850509	0.0929104	0.0565803	High across cell type family
ENSG00000065883	0.466465	0.293589	0.239946	Both to location and cell type
ENSG00000065911	0.647719	0	0.352281	High across cell type family
ENSG00000065923	0.977806	0.0163138	0.00588048	High across cell type family
ENSG00000065970	0.585809	0.161921	0.25227	High across cell type family
ENSG00000065978	0.34272	0	0.65728	High across cell type family
ENSG00000065989	0.945872	0.0254524	0.028676	High across cell type family
ENSG00000066027	0.934642	0.0563582	0.0089994	High across cell type family
ENSG00000066032	0.542834	0.126233	0.330933	High across cell type family
ENSG00000066044	0	0.565073	0.434927	High across location
ENSG00000066056	0.691959	0.258697	0.0493433	Both to location and cell type
ENSG00000066084	0.175362	0	0.824638	None
ENSG00000066117	0.15498	0.0942482	0.750772	None
ENSG00000066135	0.304162	0	0.695838	High across cell type family
ENSG00000066136	0.957905	0.00214026	0.0399545	High across cell type family
ENSG00000066185	0.580489	0	0.419511	High across cell type family
ENSG00000066230	0	0	1	None
ENSG00000066248	0.753391	0	0.246609	High across cell type family
ENSG00000066279	0.84745	0.109421	0.0431288	High across cell type family
ENSG00000066294	0.421406	0.125977	0.452617	High across cell type family
ENSG00000066322	0.919832	0.0030808	0.0770869	High across cell type family
ENSG00000066336	0.816425	0	0.183575	High across cell type family
ENSG00000066379	0.164935	0	0.835065	None
ENSG00000066382	0	0	1	None
ENSG00000066405	6.93807e-10	0.121005	0.878995	None
ENSG00000066422	0.711914	0	0.288086	High across cell type family
ENSG00000066427	0.837207	0.0451239	0.117669	High across cell type family
ENSG00000066455	0.702949	3.09556e-11	0.297051	High across cell type family
ENSG00000066468	0.903219	0.0163574	0.0804238	High across cell type family
ENSG00000066557	0.388557	0	0.611443	High across cell type family
ENSG00000066583	0	0	1	None
ENSG00000066629	0.84223	0.0992359	0.0585337	High across cell type family
ENSG00000066651	0.928633	0	0.0713669	High across cell type family
ENSG00000066654	0.617953	0	0.382047	High across cell type family
ENSG00000066697	0.935169	0.0365655	0.028266	High across cell type family
ENSG00000066735	0.5398	0.140719	0.319481	High across cell type family
ENSG00000066739	0.637857	0.0473974	0.314746	High across cell type family
ENSG00000066777	0.857406	1.6912e-11	0.142594	High across cell type family
ENSG00000066813	0	0	1	None
ENSG00000066827	0	0	1	None
ENSG00000066855	6.24044e-10	0.110253	0.889747	None
ENSG00000066923	0	0	1	None
ENSG00000066926	0	0	1	None
ENSG00000066933	9.34776e-11	0.619896	0.380104	High across location
ENSG00000067048	0.420684	0.0922296	0.487087	High across cell type family
ENSG00000067057	0.910073	0	0.0899265	High across cell type family
ENSG00000067064	0	0.169263	0.830737	None
ENSG00000067066	0.939856	0	0.0601445	High across cell type family
ENSG00000067082	0.288015	0.114242	0.597743	High across cell type family
ENSG00000067113	0.901857	0.00208088	0.0960625	High across cell type family
ENSG00000067141	0.955727	0	0.0442729	High across cell type family
ENSG00000067167	0	0	1	None
ENSG00000067177	0.960508	0	0.0394922	High across cell type family
ENSG00000067182	0.980819	0.00302647	0.0161543	High across cell type family
ENSG00000067191	0.937423	0.0510473	0.0115297	High across cell type family
ENSG00000067208	0.332125	0.111616	0.556259	High across cell type family
ENSG00000067221	0.84835	0	0.15165	High across cell type family
ENSG00000067225	0.268792	0.419203	0.312005	Both to location and cell type
ENSG00000067248	0.884866	9.57484e-10	0.115134	High across cell type family
ENSG00000067334	0.895199	0	0.104801	High across cell type family
ENSG00000067365	0.729554	5.2462e-11	0.270446	High across cell type family
ENSG00000067369	0	0	1	None
ENSG00000067445	0.794478	0.109254	0.0962676	High across cell type family
ENSG00000067533	0.938606	0.0369495	0.0244442	High across cell type family
ENSG00000067560	0	0	1	None
ENSG00000067596	0.898652	0	0.101348	High across cell type family
ENSG00000067606	0.989112	5.29017e-10	0.0108875	High across cell type family
ENSG00000067646	1.38509e-16	0	1	None
ENSG00000067704	0.226408	0.0618964	0.711695	None
ENSG00000067715	0.940285	0.0405676	0.0191478	High across cell type family
ENSG00000067798	0.858306	0.111147	0.0305477	High across cell type family
ENSG00000067829	0.745818	0	0.254182	High across cell type family
ENSG00000067836	0.620109	0.121065	0.258825	High across cell type family
ENSG00000067840	0.562333	1.95031e-07	0.437667	High across cell type family
ENSG00000067842	0.956128	0.00951084	0.0343612	High across cell type family
ENSG00000067900	0.947422	0	0.0525782	High across cell type family
ENSG00000067955	0.994828	0.00349369	0.00167847	High across cell type family
ENSG00000067992	0.0563615	0	0.943638	None
ENSG00000068001	0.432376	0.388294	0.17933	Both to location and cell type
ENSG00000068024	0.840623	0	0.159377	High across cell type family
ENSG00000068028	0.222447	0	0.777553	None
ENSG00000068078	0.997273	0	0.00272695	High across cell type family
ENSG00000068079	0.978312	0	0.0216878	High across cell type family
ENSG00000068097	0.736133	0.119909	0.143958	High across cell type family
ENSG00000068120	0.656497	0.208905	0.134598	High across cell type family
ENSG00000068137	0.926327	0.0607258	0.0129471	High across cell type family
ENSG00000068305	0.616521	0	0.383479	High across cell type family
ENSG00000068308	0.698135	0.163794	0.138071	High across cell type family
ENSG00000068323	0.908244	0	0.0917563	High across cell type family
ENSG00000068354	0.83354	0	0.16646	High across cell type family
ENSG00000068366	0.941446	0.0207035	0.0378506	High across cell type family
ENSG00000068383	0.0139006	0.128197	0.857903	None
ENSG00000068394	0.705431	0.228465	0.0661045	High across cell type family
ENSG00000068400	0	0	1	None
ENSG00000068438	0.902921	0.00273647	0.0943424	High across cell type family
ENSG00000068489	0.875764	0	0.124236	High across cell type family
ENSG00000068615	0.936874	0.0279788	0.0351477	High across cell type family
ENSG00000068650	2.75842e-10	0.0224202	0.97758	None
ENSG00000068654	0	0	1	None
ENSG00000068697	0.978639	0	0.0213611	High across cell type family
ENSG00000068724	0.979707	0	0.0202926	High across cell type family
ENSG00000068745	0.484926	0	0.515074	High across cell type family
ENSG00000068781	0.791903	0.105947	0.10215	High across cell type family
ENSG00000068784	0.805662	0.0835472	0.110791	High across cell type family
ENSG00000068796	0.165917	0.391895	0.442188	High across location
ENSG00000068831	0.245079	1.0723e-09	0.754921	None
ENSG00000068878	0.902947	0	0.097053	High across cell type family
ENSG00000068885	4.40725e-17	0	1	None
ENSG00000068903	0.776388	0	0.223612	High across cell type family
ENSG00000068912	0	0.0528483	0.947152	None
ENSG00000068971	0.641323	2.03846e-08	0.358677	High across cell type family
ENSG00000068976	0.87054	0.0359985	0.0934616	High across cell type family
ENSG00000069011	0.0314836	0	0.968516	None
ENSG00000069018	0.945618	0.026096	0.0282857	High across cell type family
ENSG00000069020	0.380055	0.0878243	0.53212	High across cell type family
ENSG00000069122	7.59541e-09	0.0202615	0.979738	None
ENSG00000069188	0	0.236503	0.763497	None
ENSG00000069206	0.724131	0.126585	0.149284	High across cell type family
ENSG00000069248	0.703707	0.104633	0.19166	High across cell type family
ENSG00000069275	0.408489	6.72091e-10	0.591511	High across cell type family
ENSG00000069329	0.911146	0	0.0888543	High across cell type family
ENSG00000069345	0.777139	0.186114	0.0367478	High across cell type family
ENSG00000069399	0.818916	0	0.181084	High across cell type family
ENSG00000069424	0.961038	0.0303965	0.00856558	High across cell type family
ENSG00000069431	0.964104	0	0.0358958	High across cell type family
ENSG00000069482	0.440224	0.421874	0.137901	Both to location and cell type
ENSG00000069493	0.94808	0.0292409	0.0226787	High across cell type family
ENSG00000069509	0.488443	0	0.511557	High across cell type family
ENSG00000069535	0.729195	0.00474151	0.266063	High across cell type family
ENSG00000069667	0.0468857	0	0.953114	None
ENSG00000069696	0.864955	0	0.135045	High across cell type family
ENSG00000069702	0.982817	0.0122379	0.00494489	High across cell type family
ENSG00000069764	0.0575939	0.389157	0.553249	High across location
ENSG00000069812	0	0.164685	0.835315	None
ENSG00000069849	0.830066	0	0.169934	High across cell type family
ENSG00000069869	0.800419	0.0193738	0.180207	High across cell type family
ENSG00000069943	0.336462	0.592642	0.0708964	Both to location and cell type
ENSG00000069956	0.00828476	0.00608311	0.985632	None
ENSG00000069966	0.975413	0.000742183	0.0238451	High across cell type family
ENSG00000069974	0.915746	1.24123e-11	0.084254	High across cell type family
ENSG00000069998	0	0.584707	0.415293	High across location
ENSG00000070010	0.961788	0.0296588	0.00855285	High across cell type family
ENSG00000070018	0.93467	0	0.0653303	High across cell type family
ENSG00000070019	0.798792	0	0.201208	High across cell type family
ENSG00000070031	0	0	1	None
ENSG00000070047	0.973999	0.00203	0.0239713	High across cell type family
ENSG00000070061	0	0	1	None
ENSG00000070081	0.834057	0	0.165943	High across cell type family
ENSG00000070087	0.413316	0	0.586684	High across cell type family
ENSG00000070159	0	0	1	None
ENSG00000070182	0.972205	0.00113166	0.0266636	High across cell type family
ENSG00000070190	5.43288e-11	0.573761	0.426239	High across location
ENSG00000070193	0.0800948	0.492227	0.427678	High across location
ENSG00000070214	0.786814	0	0.213186	High across cell type family
ENSG00000070269	0.636791	0.0488751	0.314334	High across cell type family
ENSG00000070366	0.371137	0.270624	0.358239	Both to location and cell type
ENSG00000070367	0.832555	0	0.167445	High across cell type family
ENSG00000070371	0.613874	0	0.386126	High across cell type family
ENSG00000070388	0.182415	0.67064	0.146945	High across location
ENSG00000070404	0.963451	0.000618219	0.0359305	High across cell type family
ENSG00000070413	0.138667	1.19805e-16	0.861333	None
ENSG00000070423	1.33719e-17	0	1	None
ENSG00000070444	0.875616	0	0.124384	High across cell type family
ENSG00000070476	0.958797	2.25225e-11	0.0412025	High across cell type family
ENSG00000070495	0.795118	0.0640571	0.140824	High across cell type family
ENSG00000070501	0.872036	0	0.127964	High across cell type family
ENSG00000070526	0	0.525913	0.474087	High across location
ENSG00000070540	0.860893	0	0.139107	High across cell type family
ENSG00000070601	0.301866	0.388189	0.309945	Both to location and cell type
ENSG00000070610	0.826361	0	0.173639	High across cell type family
ENSG00000070614	0.949238	0	0.0507616	High across cell type family
ENSG00000070669	0.927565	6.56533e-11	0.0724348	High across cell type family
ENSG00000070718	0.957602	0.0184587	0.0239396	High across cell type family
ENSG00000070729	0.785274	0.0936562	0.121069	High across cell type family
ENSG00000070731	0.728022	0.0402493	0.231728	High across cell type family
ENSG00000070748	0.368228	0.0496253	0.582147	High across cell type family
ENSG00000070756	0.750498	0	0.249502	High across cell type family
ENSG00000070759	0.993508	0	0.00649246	High across cell type family
ENSG00000070761	0	0	1	None
ENSG00000070770	0.334026	0	0.665974	High across cell type family
ENSG00000070778	0.75903	0	0.24097	High across cell type family
ENSG00000070785	0.392457	0	0.607543	High across cell type family
ENSG00000070808	0.461574	0.156531	0.381895	High across cell type family
ENSG00000070814	0	0	1	None
ENSG00000070831	0.844282	0	0.155718	High across cell type family
ENSG00000070882	0	0.683444	0.316556	High across location
ENSG00000070886	0.833124	1.72046e-09	0.166876	High across cell type family
ENSG00000070915	0.764794	2.02809e-08	0.235206	High across cell type family
ENSG00000070950	0.283929	0.115863	0.600208	High across cell type family
ENSG00000070961	0.911727	0.0105355	0.0777374	High across cell type family
ENSG00000070985	4.77929e-10	0.56741	0.43259	High across location
ENSG00000071051	0.741337	0	0.258663	High across cell type family
ENSG00000071054	0.952901	0.0203737	0.026725	High across cell type family
ENSG00000071073	0.914336	0.00818002	0.0774843	High across cell type family
ENSG00000071082	0.0123971	0.618626	0.368977	High across location
ENSG00000071127	0.773964	0	0.226036	High across cell type family
ENSG00000071189	0	0.502362	0.497638	High across location
ENSG00000071203	0.030378	0	0.969622	None
ENSG00000071205	0.158918	0	0.841082	None
ENSG00000071242	0.773452	0.0719195	0.154628	High across cell type family
ENSG00000071243	0	0	1	None
ENSG00000071246	0	0.893927	0.106073	High across location
ENSG00000071282	0.170614	0.500759	0.328627	High across location
ENSG00000071462	0.673553	0.229738	0.0967085	High across cell type family
ENSG00000071537	0.535503	0.118567	0.34593	High across cell type family
ENSG00000071539	0	0	1	None
ENSG00000071553	0.742761	0.125649	0.13159	High across cell type family
ENSG00000071564	0.915391	0.0661055	0.0185031	High across cell type family
ENSG00000071575	0.422451	0	0.577549	High across cell type family
ENSG00000071626	0.9374	0	0.0625995	High across cell type family
ENSG00000071655	0.865313	0.0622502	0.0724366	High across cell type family
ENSG00000071677	0	0.150207	0.849793	None
ENSG00000071794	0.367192	0.273729	0.359079	Both to location and cell type
ENSG00000071859	0.891729	0.0927958	0.0154755	High across cell type family
ENSG00000071889	0.924648	0	0.075352	High across cell type family
ENSG00000071894	0.788668	0	0.211332	High across cell type family
ENSG00000071909	0.813009	0.0718437	0.115147	High across cell type family
ENSG00000071967	0.989974	0.00244338	0.00758296	High across cell type family
ENSG00000071991	0.895586	0	0.104414	High across cell type family
ENSG00000071994	0.871359	0	0.128641	High across cell type family
ENSG00000072041	0.965836	0	0.0341643	High across cell type family
ENSG00000072042	0.612153	0.0363284	0.351519	High across cell type family
ENSG00000072062	0.725436	0.0441166	0.230448	High across cell type family
ENSG00000072071	0.974299	0	0.025701	High across cell type family
ENSG00000072080	4.21755e-09	0.183475	0.816525	None
ENSG00000072110	0.900172	0.0203967	0.0794314	High across cell type family
ENSG00000072121	0.760672	0	0.239328	High across cell type family
ENSG00000072133	0.944869	0	0.0551315	High across cell type family
ENSG00000072134	0.913565	0.0755353	0.0108997	High across cell type family
ENSG00000072135	0.591384	4.64444e-11	0.408616	High across cell type family
ENSG00000072163	0	0.399692	0.600308	High across location
ENSG00000072182	0.831659	0.0524603	0.115881	High across cell type family
ENSG00000072195	0.860846	1.66001e-09	0.139154	High across cell type family
ENSG00000072201	0.989188	0.00595363	0.00485885	High across cell type family
ENSG00000072210	0	0	1	None
ENSG00000072274	0.516203	1.8537e-10	0.483797	High across cell type family
ENSG00000072310	0.977685	0.000483487	0.021832	High across cell type family
ENSG00000072315	0.962428	0	0.0375724	High across cell type family
ENSG00000072364	0.161198	0.0854126	0.75339	None
ENSG00000072401	0.774094	0.00302511	0.222881	High across cell type family
ENSG00000072415	0	0.604987	0.395013	High across location
ENSG00000072422	0	0.465293	0.534707	High across location
ENSG00000072501	0.783803	0.193528	0.022669	High across cell type family
ENSG00000072506	0.480692	0.163675	0.355633	High across cell type family
ENSG00000072518	0.621749	0	0.378251	High across cell type family
ENSG00000072571	5.89214e-09	0.0772163	0.922784	None
ENSG00000072609	0	0	1	None
ENSG00000072657	0.677138	0.128408	0.194453	High across cell type family
ENSG00000072682	0.185352	0.306888	0.507761	High across location
ENSG00000072694	0.381572	0.101288	0.51714	High across cell type family
ENSG00000072736	0.621046	0	0.378954	High across cell type family
ENSG00000072756	0.880464	0	0.119536	High across cell type family
ENSG00000072778	0.95663	0	0.0433698	High across cell type family
ENSG00000072786	0.211167	0	0.788833	None
ENSG00000072803	8.36951e-10	0.283125	0.716875	High across location
ENSG00000072818	0	0.698593	0.301407	High across location
ENSG00000072832	0.856438	0.0810973	0.0624646	High across cell type family
ENSG00000072840	0.941349	4.78233e-10	0.0586509	High across cell type family
ENSG00000072849	0.663109	0.00189592	0.334995	High across cell type family
ENSG00000072858	0.373337	0.530136	0.0965266	Both to location and cell type
ENSG00000072864	0.955506	3.14192e-11	0.0444939	High across cell type family
ENSG00000072952	0.993083	0.000308585	0.00660825	High across cell type family
ENSG00000072954	8.14763e-11	0.457375	0.542625	High across location
ENSG00000072958	0.748751	0.0257191	0.225529	High across cell type family
ENSG00000073008	0.934322	0.0152753	0.0504024	High across cell type family
ENSG00000073050	0.230007	0	0.769993	None
ENSG00000073060	4.67078e-08	0.0340434	0.965957	None
ENSG00000073067	3.69882e-10	0.231381	0.768619	None
ENSG00000073111	0.0270067	0	0.972993	None
ENSG00000073146	0.593175	0.355897	0.0509281	Both to location and cell type
ENSG00000073150	0.587014	0	0.412986	High across cell type family
ENSG00000073169	0.144848	0.0641711	0.790981	None
ENSG00000073282	0.25715	0.467027	0.275823	Both to location and cell type
ENSG00000073331	0.696609	0.0684455	0.234946	High across cell type family
ENSG00000073350	0.939086	0.00308423	0.0578302	High across cell type family
ENSG00000073417	0.82047	0	0.17953	High across cell type family
ENSG00000073464	0.977582	0	0.0224177	High across cell type family
ENSG00000073536	0.559447	0.00718414	0.433369	High across cell type family
ENSG00000073578	0.53315	0.10853	0.35832	High across cell type family
ENSG00000073584	0	0.265904	0.734096	High across location
ENSG00000073598	0.0080001	0.778536	0.213464	High across location
ENSG00000073605	0	0.0210973	0.978903	None
ENSG00000073614	0.247093	0.172052	0.580855	None
ENSG00000073670	0.665038	2.06252e-17	0.334962	High across cell type family
ENSG00000073711	0.0993087	7.86705e-16	0.900691	None
ENSG00000073712	0.896369	3.39007e-11	0.103631	High across cell type family
ENSG00000073734	0.827598	0.0382204	0.134182	High across cell type family
ENSG00000073737	0	0	1	None
ENSG00000073754	0	0	1	None
ENSG00000073756	0.805964	0.0878134	0.106223	High across cell type family
ENSG00000073792	0.523705	0	0.476295	High across cell type family
ENSG00000073803	0.632513	0	0.367487	High across cell type family
ENSG00000073849	0.744279	0	0.255721	High across cell type family
ENSG00000073861	1.85177e-21	1.29771e-20	1	None
ENSG00000073910	0.621828	0.165842	0.21233	High across cell type family
ENSG00000073921	0.960203	0.0314387	0.0083581	High across cell type family
ENSG00000073969	0.985148	0.0014942	0.0133576	High across cell type family
ENSG00000074047	0.971931	0.0112452	0.0168236	High across cell type family
ENSG00000074054	0.756826	0	0.243174	High across cell type family
ENSG00000074071	0.610776	1.97783e-10	0.389224	High across cell type family
ENSG00000074181	0.99283	0.00338066	0.00378908	High across cell type family
ENSG00000074201	0.84141	0	0.15859	High across cell type family
ENSG00000074211	0.28718	0.305728	0.407093	Both to location and cell type
ENSG00000074219	0.823234	0	0.176766	High across cell type family
ENSG00000074266	0	0.523095	0.476905	High across location
ENSG00000074276	0	0.209524	0.790476	None
ENSG00000074317	0.950268	0.00711624	0.0426162	High across cell type family
ENSG00000074319	0.676632	0.128392	0.194976	High across cell type family
ENSG00000074356	0.859146	0.0895911	0.0512627	High across cell type family
ENSG00000074370	0.443361	0	0.556639	High across cell type family
ENSG00000074410	0.793356	0	0.206644	High across cell type family
ENSG00000074416	0.556256	0.186115	0.257629	High across cell type family
ENSG00000074527	0.179753	0.433945	0.386302	High across location
ENSG00000074582	0.661566	0	0.338434	High across cell type family
ENSG00000074590	0.0781502	0.619942	0.301908	High across location
ENSG00000074603	0.929746	0	0.070254	High across cell type family
ENSG00000074621	0.810604	0.00394455	0.185451	High across cell type family
ENSG00000074657	0.918287	0	0.0817135	High across cell type family
ENSG00000074660	0.351679	0	0.648321	High across cell type family
ENSG00000074695	0.763292	0.0896858	0.147022	High across cell type family
ENSG00000074696	0	0.884604	0.115396	High across location
ENSG00000074706	0.845926	0	0.154074	High across cell type family
ENSG00000074755	0.64609	0	0.35391	High across cell type family
ENSG00000074771	0	0.175793	0.824207	None
ENSG00000074800	0.864639	2.12591e-09	0.135361	High across cell type family
ENSG00000074803	0.310074	0	0.689926	High across cell type family
ENSG00000074842	0.432087	3.13012e-09	0.567913	High across cell type family
ENSG00000074855	0.962818	0	0.0371815	High across cell type family
ENSG00000074935	0.901776	0	0.0982236	High across cell type family
ENSG00000074964	0.823567	0	0.176433	High across cell type family
ENSG00000074966	0.604555	0	0.395445	High across cell type family
ENSG00000075035	0.979448	4.37308e-11	0.0205523	High across cell type family
ENSG00000075043	0.946494	0.0354277	0.0180788	High across cell type family
ENSG00000075073	0	0.829316	0.170684	High across location
ENSG00000075089	0.855002	0.0194599	0.125539	High across cell type family
ENSG00000075131	0.92006	0	0.0799398	High across cell type family
ENSG00000075142	0.953535	0	0.0464648	High across cell type family
ENSG00000075151	0.654586	0.0622444	0.283169	High across cell type family
ENSG00000075188	0.880169	0	0.119831	High across cell type family
ENSG00000075213	0.169761	0.261903	0.568335	High across location
ENSG00000075218	9.93575e-10	0.0493638	0.950636	None
ENSG00000075223	0.589762	0.0632796	0.346958	High across cell type family
ENSG00000075234	0.962642	0.000436912	0.0369208	High across cell type family
ENSG00000075239	0.840823	0	0.159177	High across cell type family
ENSG00000075240	0.964904	0	0.0350956	High across cell type family
ENSG00000075275	0.0753214	0.499767	0.424911	High across location
ENSG00000075290	3.15658e-09	0.204286	0.795714	None
ENSG00000075292	0.137439	0.067952	0.794609	None
ENSG00000075303	0	0.46914	0.53086	High across location
ENSG00000075336	0.595899	0.00749339	0.396608	High across cell type family
ENSG00000075340	0.97656	0.00222854	0.0212118	High across cell type family
ENSG00000075391	0.930443	0.0400172	0.0295401	High across cell type family
ENSG00000075399	0	0	1	None
ENSG00000075407	8.35171e-18	0.345263	0.654737	High across location
ENSG00000075413	0.858795	0	0.141205	High across cell type family
ENSG00000075415	0.844817	0	0.155183	High across cell type family
ENSG00000075420	0.913591	0	0.0864093	High across cell type family
ENSG00000075426	0.589008	0	0.410992	High across cell type family
ENSG00000075429	0.100232	0.420566	0.479203	High across location
ENSG00000075461	0.421467	0	0.578533	High across cell type family
ENSG00000075539	0	0.711446	0.288554	High across location
ENSG00000075568	0.623964	0.015616	0.36042	High across cell type family
ENSG00000075618	0.974301	0.00742026	0.0182786	High across cell type family
ENSG00000075624	2.99519e-10	0.252538	0.747462	High across location
ENSG00000075643	0.0867987	0.192913	0.720288	None
ENSG00000075651	0	0	1	None
ENSG00000075673	1.49137e-09	0.692025	0.307975	High across location
ENSG00000075702	0	0.434245	0.565755	High across location
ENSG00000075711	0	0.428485	0.571515	High across location
ENSG00000075785	0.945061	0	0.0549389	High across cell type family
ENSG00000075790	0	0.0354643	0.964536	None
ENSG00000075826	0.852221	0	0.147779	High across cell type family
ENSG00000075856	0.0672291	0.00704669	0.925724	None
ENSG00000075884	0.148014	0	0.851986	None
ENSG00000075886	1.21509e-10	0	1	None
ENSG00000075891	0	0.508717	0.491283	High across location
ENSG00000075914	0.514771	0.0972789	0.38795	High across cell type family
ENSG00000075945	0.930332	0.0428211	0.0268471	High across cell type family
ENSG00000075975	0.617917	0	0.382083	High across cell type family
ENSG00000076003	0.055274	0.378833	0.565893	High across location
ENSG00000076043	0.883314	0	0.116686	High across cell type family
ENSG00000076053	7.11376e-16	0.494266	0.505734	High across location
ENSG00000076067	0.982333	0	0.0176672	High across cell type family
ENSG00000076108	0.811029	0	0.188971	High across cell type family
ENSG00000076201	0.517013	0	0.482987	High across cell type family
ENSG00000076242	0.688102	0	0.311898	High across cell type family
ENSG00000076248	0.953723	0.0053313	0.0409458	High across cell type family
ENSG00000076258	0.990514	0.00239986	0.00708638	High across cell type family
ENSG00000076321	0	0	1	None
ENSG00000076344	0.0948428	0.423783	0.481374	High across location
ENSG00000076351	0.796923	0.161248	0.0418294	High across cell type family
ENSG00000076356	0.843023	0	0.156977	High across cell type family
ENSG00000076382	0.418259	0	0.581741	High across cell type family
ENSG00000076513	0	0.138375	0.861625	None
ENSG00000076554	0.706156	0.0829483	0.210896	High across cell type family
ENSG00000076555	0.966131	0	0.033869	High across cell type family
ENSG00000076604	0.975091	0.00315358	0.0217552	High across cell type family
ENSG00000076641	1.6903e-10	0.31094	0.68906	High across location
ENSG00000076650	0	0.0224617	0.977538	None
ENSG00000076662	0.973356	0.00782707	0.0188166	High across cell type family
ENSG00000076685	0.978261	0	0.0217389	High across cell type family
ENSG00000076706	0	0	1	None
ENSG00000076716	0.98731	0.00183483	0.010855	High across cell type family
ENSG00000076770	0.691682	0.0197416	0.288577	High across cell type family
ENSG00000076826	0.860782	0.0548936	0.0843246	High across cell type family
ENSG00000076864	0.7554	0.134957	0.109643	High across cell type family
ENSG00000076924	0.448589	0.20853	0.342881	High across cell type family
ENSG00000076928	0.959168	1.61645e-17	0.0408317	High across cell type family
ENSG00000076944	0.0625326	0.396303	0.541164	High across location
ENSG00000076984	0.477815	0.02396	0.498225	High across cell type family
ENSG00000077009	0.159207	0	0.840793	None
ENSG00000077044	0.523781	0	0.476219	High across cell type family
ENSG00000077063	0.914527	0.0205343	0.0649383	High across cell type family
ENSG00000077080	0.995224	0	0.00477584	High across cell type family
ENSG00000077092	0	0.563223	0.436777	High across location
ENSG00000077097	0	0	1	None
ENSG00000077147	0.45211	0.435903	0.111986	Both to location and cell type
ENSG00000077150	0.947895	0.0243596	0.0277454	High across cell type family
ENSG00000077152	0.956435	0.0215316	0.0220333	High across cell type family
ENSG00000077157	0.809924	0.0689805	0.121095	High across cell type family
ENSG00000077232	0.102927	0	0.897073	None
ENSG00000077235	0.0852201	0.819942	0.0948376	High across location
ENSG00000077238	0.801177	0.110459	0.0883634	High across cell type family
ENSG00000077254	0.919677	0.00845817	0.0718647	High across cell type family
ENSG00000077264	0.959897	0	0.0401028	High across cell type family
ENSG00000077274	0.273342	0	0.726658	High across cell type family
ENSG00000077279	0.939985	0.029434	0.0305811	High across cell type family
ENSG00000077312	0	0.284127	0.715873	High across location
ENSG00000077327	0	0	1	None
ENSG00000077348	0.940622	0.0220525	0.0373257	High across cell type family
ENSG00000077380	0.986681	0	0.013319	High across cell type family
ENSG00000077420	0.416491	0.358282	0.225227	Both to location and cell type
ENSG00000077454	0.810903	0	0.189097	High across cell type family
ENSG00000077458	0.674689	0	0.325311	High across cell type family
ENSG00000077463	0.322546	0.453615	0.223839	Both to location and cell type
ENSG00000077498	0.330506	0	0.669494	High across cell type family
ENSG00000077514	0	0	1	None
ENSG00000077522	0.209621	0	0.790379	None
ENSG00000077549	0.318264	0.146376	0.53536	High across cell type family
ENSG00000077585	0.728159	0	0.271841	High across cell type family
ENSG00000077616	0.883116	0.0538715	0.0630129	High across cell type family
ENSG00000077684	0.816588	3.82121e-18	0.183412	High across cell type family
ENSG00000077713	0.972073	0.00686977	0.0210576	High across cell type family
ENSG00000077721	0.67737	0	0.32263	High across cell type family
ENSG00000077782	0.770618	0	0.229382	High across cell type family
ENSG00000077800	0.449674	0	0.550326	High across cell type family
ENSG00000077935	0	0.124949	0.875051	None
ENSG00000077942	0.991508	3.60649e-16	0.00849176	High across cell type family
ENSG00000077943	0.922955	1.64365e-11	0.077045	High across cell type family
ENSG00000077984	0.235141	0	0.764859	None
ENSG00000078018	0.969236	0.0190649	0.0116991	High across cell type family
ENSG00000078043	0.589074	0	0.410926	High across cell type family
ENSG00000078053	0.957495	0	0.0425048	High across cell type family
ENSG00000078061	0.897522	0.00475771	0.09772	High across cell type family
ENSG00000078070	0.793155	0	0.206845	High across cell type family
ENSG00000078081	0.942737	0	0.0572628	High across cell type family
ENSG00000078098	0.971692	0.00791946	0.0203889	High across cell type family
ENSG00000078114	0.68908	0.00793376	0.302986	High across cell type family
ENSG00000078124	7.75836e-10	0.264182	0.735818	High across location
ENSG00000078140	0.633554	0	0.366446	High across cell type family
ENSG00000078142	0.00119855	0.573143	0.425659	High across location
ENSG00000078177	0.857477	0.00972839	0.132794	High across cell type family
ENSG00000078237	0	0.0192118	0.980788	None
ENSG00000078246	0.96877	6.28183e-12	0.0312299	High across cell type family
ENSG00000078269	2.26313e-10	0.0956668	0.904333	None
ENSG00000078295	0.785661	0.000821531	0.213517	High across cell type family
ENSG00000078304	0.349676	0.424498	0.225825	Both to location and cell type
ENSG00000078328	0.910654	0.0174971	0.0718488	High across cell type family
ENSG00000078369	0.800146	0	0.199854	High across cell type family
ENSG00000078401	0	0	1	None
ENSG00000078403	0.6191	0.0257606	0.35514	High across cell type family
ENSG00000078487	0.969576	0.0161223	0.0143022	High across cell type family
ENSG00000078549	0.915113	7.80512e-11	0.084887	High across cell type family
ENSG00000078579	0.563163	0	0.436837	High across cell type family
ENSG00000078589	0	0.150207	0.849793	None
ENSG00000078596	0	0	1	None
ENSG00000078618	0	0	1	None
ENSG00000078668	0.473045	0.0738789	0.453076	High across cell type family
ENSG00000078674	0.0863482	1.03366e-10	0.913652	None
ENSG00000078687	0	0	1	None
ENSG00000078699	0.773864	0	0.226136	High across cell type family
ENSG00000078725	0.574911	3.35356e-07	0.425088	High across cell type family
ENSG00000078747	0.711022	0	0.288978	High across cell type family
ENSG00000078795	0	0.281833	0.718167	High across location
ENSG00000078804	0	0.489614	0.510386	High across location
ENSG00000078808	0.897698	0	0.102302	High across cell type family
ENSG00000078814	0.953675	0.011052	0.0352732	High across cell type family
ENSG00000078900	0.497055	0	0.502945	High across cell type family
ENSG00000078902	0.834208	0	0.165792	High across cell type family
ENSG00000078967	8.89835e-10	0.299383	0.700617	High across location
ENSG00000079101	0.879586	0	0.120414	High across cell type family
ENSG00000079102	0	0	1	None
ENSG00000079112	0.00290656	0.090455	0.906638	None
ENSG00000079134	0.876633	0	0.123367	High across cell type family
ENSG00000079150	0.390563	0	0.609437	High across cell type family
ENSG00000079156	3.66312e-09	0.228571	0.771429	None
ENSG00000079215	0.982134	0.00575136	0.0121142	High across cell type family
ENSG00000079246	0	0	1	None
ENSG00000079257	0.70364	0.185447	0.110913	High across cell type family
ENSG00000079263	0.794086	0	0.205914	High across cell type family
ENSG00000079277	0.590843	0.18503	0.224127	High across cell type family
ENSG00000079308	0.926883	0	0.0731165	High across cell type family
ENSG00000079313	0.512373	0	0.487627	High across cell type family
ENSG00000079332	0.919626	0	0.0803739	High across cell type family
ENSG00000079335	0.951068	3.1597e-10	0.0489325	High across cell type family
ENSG00000079337	0.977548	5.37718e-12	0.0224516	High across cell type family
ENSG00000079385	0.35969	0	0.64031	High across cell type family
ENSG00000079387	0.841375	0	0.158625	High across cell type family
ENSG00000079393	0.323838	0	0.676162	High across cell type family
ENSG00000079432	0.921941	0.040925	0.0371339	High across cell type family
ENSG00000079435	0.300105	0.307735	0.39216	Both to location and cell type
ENSG00000079459	0	0.101777	0.898223	None
ENSG00000079462	0.68365	0.0542097	0.26214	High across cell type family
ENSG00000079482	0.919948	0.0259471	0.0541047	High across cell type family
ENSG00000079557	0	0.362884	0.637116	High across location
ENSG00000079616	0	0.391478	0.608522	High across location
ENSG00000079689	0.52477	0.195673	0.279558	High across cell type family
ENSG00000079691	0.85565	0	0.14435	High across cell type family
ENSG00000079739	0.832159	0	0.167841	High across cell type family
ENSG00000079785	0.954401	5.57106e-12	0.0455986	High across cell type family
ENSG00000079805	0	0	1	None
ENSG00000079819	0.29172	0.449442	0.258838	Both to location and cell type
ENSG00000079841	0.914624	0.0328412	0.0525349	High across cell type family
ENSG00000079931	0.0380716	0.677662	0.284266	High across location
ENSG00000079950	0.360423	0.00235901	0.637218	High across cell type family
ENSG00000079974	0.536936	0	0.463064	High across cell type family
ENSG00000079999	0	0.509805	0.490195	High across location
ENSG00000080007	0.244221	0.253157	0.502622	High across location
ENSG00000080031	0.523978	0.425284	0.0507376	Both to location and cell type
ENSG00000080166	0.857135	0	0.142865	High across cell type family
ENSG00000080189	0.360706	1.1366e-18	0.639294	High across cell type family
ENSG00000080200	0.641919	0.0150776	0.343003	High across cell type family
ENSG00000080224	0.515946	0.258927	0.225127	Both to location and cell type
ENSG00000080293	0.410374	2.90575e-18	0.589626	High across cell type family
ENSG00000080298	0.96604	0.0249247	0.00903577	High across cell type family
ENSG00000080345	0	0.0149826	0.985017	None
ENSG00000080371	0.0529557	0	0.947044	None
ENSG00000080493	0.896868	0.0241286	0.0790036	High across cell type family
ENSG00000080503	0.658126	0.184435	0.157439	High across cell type family
ENSG00000080511	0	0.362908	0.637092	High across location
ENSG00000080546	0.470958	0	0.529042	High across cell type family
ENSG00000080561	0.539175	0	0.460825	High across cell type family
ENSG00000080572	0.180633	0	0.819367	None
ENSG00000080573	0.973574	0.0183113	0.0081147	High across cell type family
ENSG00000080603	0.310612	0.271857	0.41753	Both to location and cell type
ENSG00000080608	0	0	1	None
ENSG00000080618	0	0.20535	0.79465	None
ENSG00000080644	0.751819	0.106628	0.141553	High across cell type family
ENSG00000080709	0.636187	0	0.363813	High across cell type family
ENSG00000080802	0.406071	0	0.593929	High across cell type family
ENSG00000080815	0.819712	0.141055	0.0392331	High across cell type family
ENSG00000080819	0.89493	0	0.10507	High across cell type family
ENSG00000080822	0	0.39583	0.60417	High across location
ENSG00000080823	0.982108	0.00877219	0.00911985	High across cell type family
ENSG00000080824	0	0.851198	0.148802	High across location
ENSG00000080839	1.15962e-09	0.860836	0.139164	High across location
ENSG00000080845	0.915199	0.0114501	0.0733508	High across cell type family
ENSG00000080854	0.848016	2.5304e-11	0.151984	High across cell type family
ENSG00000080986	0	0.336749	0.663251	High across location
ENSG00000081014	0.207803	0	0.792197	None
ENSG00000081019	0.828795	0	0.171205	High across cell type family
ENSG00000081026	0.0263308	0	0.973669	None
ENSG00000081041	0.968773	0	0.0312274	High across cell type family
ENSG00000081051	0.0735367	0	0.926463	None
ENSG00000081052	0	0	1	None
ENSG00000081059	0.817434	0.085026	0.0975396	High across cell type family
ENSG00000081087	0.146406	0.230807	0.622787	None
ENSG00000081138	0.970112	1.1903e-10	0.0298879	High across cell type family
ENSG00000081148	0.574047	0.00713215	0.418821	High across cell type family
ENSG00000081154	0.863626	0.0306989	0.105675	High across cell type family
ENSG00000081177	0.116683	0.498473	0.384844	High across location
ENSG00000081181	0.85754	0	0.14246	High across cell type family
ENSG00000081189	2.82118e-08	0.535463	0.464537	High across location
ENSG00000081237	0.738247	5.44441e-11	0.261753	High across cell type family
ENSG00000081248	0.591809	0	0.408191	High across cell type family
ENSG00000081277	0.138574	0.377408	0.484019	High across location
ENSG00000081307	0.627186	0.0110022	0.361812	High across cell type family
ENSG00000081320	0.967778	0.0317052	0.000516385	High across cell type family
ENSG00000081377	0.792797	0.0266283	0.180574	High across cell type family
ENSG00000081386	0.649367	0.134522	0.21611	High across cell type family
ENSG00000081479	0	0	1	None
ENSG00000081665	0.407187	0.186066	0.406747	High across cell type family
ENSG00000081692	0.5178	0.0234867	0.458713	High across cell type family
ENSG00000081721	0.794228	0	0.205772	High across cell type family
ENSG00000081760	0.859591	0.0829901	0.0574192	High across cell type family
ENSG00000081791	0.851434	1.66332e-10	0.148566	High across cell type family
ENSG00000081800	1.41367e-10	0.159986	0.840014	None
ENSG00000081803	0.525826	0	0.474174	High across cell type family
ENSG00000081818	0.297722	0.576552	0.125726	Both to location and cell type
ENSG00000081842	0.972287	0.00342304	0.0242901	High across cell type family
ENSG00000081853	2.06476e-10	0.726356	0.273644	High across location
ENSG00000081870	0.260708	0.594743	0.144549	Both to location and cell type
ENSG00000081913	0.99027	0.00069162	0.00903811	High across cell type family
ENSG00000081923	0.566018	0	0.433982	High across cell type family
ENSG00000081985	0.355741	0.15574	0.488519	High across cell type family
ENSG00000082014	0.826732	0.126028	0.0472403	High across cell type family
ENSG00000082068	0.246096	1.53796e-09	0.753904	None
ENSG00000082074	0.804262	0	0.195738	High across cell type family
ENSG00000082126	0.90071	3.9733e-11	0.0992897	High across cell type family
ENSG00000082146	0	0.513867	0.486133	High across location
ENSG00000082153	0.382227	1.4631e-17	0.617773	High across cell type family
ENSG00000082175	0	0.567302	0.432698	High across location
ENSG00000082196	0.41598	0.146431	0.437589	High across cell type family
ENSG00000082212	0.325725	0.0860797	0.588195	High across cell type family
ENSG00000082213	0.00640273	0	0.993597	None
ENSG00000082258	0.72045	0.0280113	0.251539	High across cell type family
ENSG00000082269	0	0	1	None
ENSG00000082293	0.982291	0.0120048	0.00570446	High across cell type family
ENSG00000082397	0.954749	0.0259532	0.0192978	High across cell type family
ENSG00000082438	0.118391	0.243885	0.637724	None
ENSG00000082458	0.95595	0.0331673	0.0108823	High across cell type family
ENSG00000082482	0.164349	0	0.835651	None
ENSG00000082497	0	0.244575	0.755425	None
ENSG00000082512	0.60418	0.09344	0.30238	High across cell type family
ENSG00000082515	0.258506	0.315559	0.425935	Both to location and cell type
ENSG00000082516	0.50983	0	0.49017	High across cell type family
ENSG00000082556	0.853841	0.0394377	0.106722	High across cell type family
ENSG00000082641	0.423359	0.366195	0.210446	Both to location and cell type
ENSG00000082684	0.0412659	0.565389	0.393345	High across location
ENSG00000082701	0.87292	0	0.12708	High across cell type family
ENSG00000082781	0.808543	0.00927645	0.18218	High across cell type family
ENSG00000082805	0.909763	0.0672538	0.0229828	High across cell type family
ENSG00000082898	0.978196	0	0.0218041	High across cell type family
ENSG00000082996	0.553105	0	0.446895	High across cell type family
ENSG00000083067	0.887818	0.102353	0.00982879	High across cell type family
ENSG00000083093	0.121552	0.215484	0.662964	None
ENSG00000083097	0.775673	0	0.224327	High across cell type family
ENSG00000083099	0	0	1	None
ENSG00000083123	0.972196	0.0151151	0.0126891	High across cell type family
ENSG00000083168	0.767257	0	0.232743	High across cell type family
ENSG00000083223	0.548989	0.0221529	0.428858	High across cell type family
ENSG00000083290	0.349887	0	0.650113	High across cell type family
ENSG00000083307	0.440742	0	0.559258	High across cell type family
ENSG00000083312	0	0	1	None
ENSG00000083444	0.830712	0	0.169288	High across cell type family
ENSG00000083454	0.072636	5.79949e-09	0.927364	None
ENSG00000083457	0	0.41071	0.58929	High across location
ENSG00000083520	0.696784	0.112641	0.190574	High across cell type family
ENSG00000083535	0.803141	0.0271754	0.169684	High across cell type family
ENSG00000083544	0.9038	0	0.0961998	High across cell type family
ENSG00000083635	0.218307	0.00497767	0.776716	None
ENSG00000083642	0.400991	0.264067	0.334942	Both to location and cell type
ENSG00000083720	0.924509	0	0.0754911	High across cell type family
ENSG00000083750	0.0903786	0.814198	0.0954233	High across location
ENSG00000083782	0.110558	0	0.889442	None
ENSG00000083799	0.749085	0.0781353	0.17278	High across cell type family
ENSG00000083807	0.527908	0.190205	0.281888	High across cell type family
ENSG00000083812	0.399937	0.229798	0.370265	High across cell type family
ENSG00000083814	0.920343	0.0105722	0.0690848	High across cell type family
ENSG00000083817	0	0	1	None
ENSG00000083828	0.237361	4.147e-16	0.762639	None
ENSG00000083838	0.386647	0	0.613353	High across cell type family
ENSG00000083844	0	0	1	None
ENSG00000083845	0.358841	8.31914e-15	0.641159	High across cell type family
ENSG00000083857	0.78631	0.0305472	0.183143	High across cell type family
ENSG00000083896	0.624984	0.0210429	0.353973	High across cell type family
ENSG00000083937	4.4607e-15	0	1	None
ENSG00000084070	0.989327	0.000773791	0.00989943	High across cell type family
ENSG00000084072	0.972924	0.00227241	0.0248039	High across cell type family
ENSG00000084073	0.896421	3.2482e-11	0.103579	High across cell type family
ENSG00000084090	6.72633e-10	0.347061	0.652939	High across location
ENSG00000084092	0.425947	0	0.574053	High across cell type family
ENSG00000084093	0.994668	0.0036407	0.00169164	High across cell type family
ENSG00000084110	0.408826	0.276279	0.314895	Both to location and cell type
ENSG00000084112	0.668439	0.0440571	0.287504	High across cell type family
ENSG00000084207	0	0.250957	0.749043	High across location
ENSG00000084234	0.956526	0.0182986	0.0251759	High across cell type family
ENSG00000084444	0.310866	0.584074	0.10506	Both to location and cell type
ENSG00000084453	0.952781	0.0250502	0.022169	High across cell type family
ENSG00000084463	0.608964	0	0.391036	High across cell type family
ENSG00000084623	0.702125	0.0727929	0.225082	High across cell type family
ENSG00000084628	0.908599	0.0831189	0.00828232	High across cell type family
ENSG00000084636	0.906811	0	0.0931889	High across cell type family
ENSG00000084652	0.711328	0	0.288672	High across cell type family
ENSG00000084674	0.720806	0	0.279194	High across cell type family
ENSG00000084676	0.894564	4.28187e-18	0.105436	High across cell type family
ENSG00000084693	0	3.85872e-17	1	None
ENSG00000084710	0.370167	0	0.629833	High across cell type family
ENSG00000084731	0.981276	0.0143889	0.00433521	High across cell type family
ENSG00000084733	0.942124	0.0277953	0.0300806	High across cell type family
ENSG00000084734	0	0.195193	0.804807	None
ENSG00000084754	0.966489	0.015309	0.0182015	High across cell type family
ENSG00000084764	0.903288	0.0114121	0.0852998	High across cell type family
ENSG00000084774	0.959901	0	0.0400987	High across cell type family
ENSG00000085063	0	0.00135915	0.998641	None
ENSG00000085117	0.988393	0	0.0116069	High across cell type family
ENSG00000085185	0.758641	0.025185	0.216174	High across cell type family
ENSG00000085224	0.787519	0	0.212481	High across cell type family
ENSG00000085231	0	0	1	None
ENSG00000085265	0.063738	0	0.936262	None
ENSG00000085274	0.704359	0	0.295641	High across cell type family
ENSG00000085276	0	0.719009	0.280991	High across location
ENSG00000085365	0.646629	7.18853e-19	0.353371	High across cell type family
ENSG00000085377	0.337254	0	0.662746	High across cell type family
ENSG00000085382	0.933866	0	0.0661339	High across cell type family
ENSG00000085415	0.769721	0	0.230279	High across cell type family
ENSG00000085433	0.63105	0.16854	0.200411	High across cell type family
ENSG00000085449	0.842955	0	0.157045	High across cell type family
ENSG00000085465	0.165912	0.010342	0.823746	None
ENSG00000085491	0.6819	0.118919	0.199181	High across cell type family
ENSG00000085511	0.70432	0	0.29568	High across cell type family
ENSG00000085514	0.692198	0	0.307802	High across cell type family
ENSG00000085552	0.815198	0.027213	0.157589	High across cell type family
ENSG00000085563	0.935133	0.0204955	0.0443715	High across cell type family
ENSG00000085644	0.172492	0	0.827508	None
ENSG00000085662	0.798098	0	0.201902	High across cell type family
ENSG00000085719	0.711125	0.0138975	0.274977	High across cell type family
ENSG00000085721	0	0	1	None
ENSG00000085733	0.78771	0.0425776	0.169713	High across cell type family
ENSG00000085741	0.340644	0.571181	0.0881743	Both to location and cell type
ENSG00000085760	0.866984	0	0.133016	High across cell type family
ENSG00000085788	0.671402	0.128964	0.199634	High across cell type family
ENSG00000085831	0.945572	0.0264895	0.0279388	High across cell type family
ENSG00000085832	0.910701	0	0.0892987	High across cell type family
ENSG00000085840	1.17588e-08	0.659099	0.340901	High across location
ENSG00000085871	0.750428	0.231687	0.0178851	High across cell type family
ENSG00000085872	0.554619	0	0.445381	High across cell type family
ENSG00000085978	0.901509	0.0598947	0.0385959	High across cell type family
ENSG00000085982	0.950331	0	0.0496692	High across cell type family
ENSG00000085998	0.498637	0.189271	0.312092	High across cell type family
ENSG00000085999	0	0	1	None
ENSG00000086015	0	0	1	None
ENSG00000086061	0.862671	0	0.137329	High across cell type family
ENSG00000086062	8.54502e-10	0.360168	0.639832	High across location
ENSG00000086065	0.377268	0.206305	0.416427	High across cell type family
ENSG00000086102	0	0	1	None
ENSG00000086159	0.932264	0.0628624	0.00487403	High across cell type family
ENSG00000086189	0.225236	0.129247	0.645517	None
ENSG00000086200	0	0.105757	0.894243	None
ENSG00000086205	0.841167	0	0.158833	High across cell type family
ENSG00000086232	0.509778	0.0295092	0.460713	High across cell type family
ENSG00000086288	0.0952228	0.0433113	0.861466	None
ENSG00000086289	0.800789	0.111878	0.0873327	High across cell type family
ENSG00000086300	0.98105	0.00757384	0.0113763	High across cell type family
ENSG00000086475	0	0.459866	0.540134	High across location
ENSG00000086504	0.447962	0.232536	0.319502	High across cell type family
ENSG00000086506	0.500688	0.221231	0.278081	High across cell type family
ENSG00000086544	0.8943	0	0.1057	High across cell type family
ENSG00000086548	0	0.363312	0.636688	High across location
ENSG00000086570	0.0863213	0	0.913679	None
ENSG00000086589	0.581596	0.20731	0.211094	High across cell type family
ENSG00000086598	0.650144	0.0105433	0.339312	High across cell type family
ENSG00000086619	0.536264	1.19473e-09	0.463736	High across cell type family
ENSG00000086666	0.928008	0	0.0719921	High across cell type family
ENSG00000086696	0.00411823	0	0.995882	None
ENSG00000086712	0.927861	0.0582418	0.0138974	High across cell type family
ENSG00000086717	0	0.169271	0.830729	None
ENSG00000086730	0.121469	0.19523	0.683301	None
ENSG00000086758	0.105995	0.205109	0.688896	None
ENSG00000086827	0.461986	0.0897801	0.448234	High across cell type family
ENSG00000086848	0	0.515129	0.484871	High across location
ENSG00000086967	0.507723	0.391679	0.100598	Both to location and cell type
ENSG00000086991	0	0.440561	0.559439	High across location
ENSG00000087008	0.700084	0	0.299916	High across cell type family
ENSG00000087053	0.838634	0.141507	0.0198586	High across cell type family
ENSG00000087074	3.5374e-10	0.389811	0.610189	High across location
ENSG00000087076	0.719306	0.0274613	0.253233	High across cell type family
ENSG00000087077	0.995333	0.000343898	0.00432304	High across cell type family
ENSG00000087085	0.655628	0.19922	0.145152	High across cell type family
ENSG00000087086	0.484127	3.03998e-18	0.515873	High across cell type family
ENSG00000087087	0.956916	0.029217	0.0138665	High across cell type family
ENSG00000087088	0	0	1	None
ENSG00000087095	0.418354	0.119564	0.462083	High across cell type family
ENSG00000087111	3.19578e-10	0.645128	0.354872	High across location
ENSG00000087116	0.562894	0.36595	0.0711554	Both to location and cell type
ENSG00000087152	0.564354	0	0.435646	High across cell type family
ENSG00000087157	0.11374	0	0.88626	None
ENSG00000087191	0	0.151022	0.848978	None
ENSG00000087206	1.1406e-10	0.143783	0.856217	None
ENSG00000087237	0	0.288099	0.711901	High across location
ENSG00000087245	0.768399	0.140953	0.0906481	High across cell type family
ENSG00000087250	0.980838	0	0.0191621	High across cell type family
ENSG00000087253	0.925755	0.0436305	0.0306145	High across cell type family
ENSG00000087258	0.300759	0	0.699241	High across cell type family
ENSG00000087263	0.390236	0	0.609764	High across cell type family
ENSG00000087266	0.982702	0.00666235	0.0106354	High across cell type family
ENSG00000087269	0	0.412856	0.587144	High across location
ENSG00000087274	0.945937	0	0.0540632	High across cell type family
ENSG00000087299	0.946123	0	0.0538769	High across cell type family
ENSG00000087301	0.971296	0	0.0287044	High across cell type family
ENSG00000087302	0.412959	0.0530649	0.533976	High across cell type family
ENSG00000087303	0.59889	0	0.40111	High across cell type family
ENSG00000087338	0.976509	0.0106889	0.0128024	High across cell type family
ENSG00000087365	0.671552	0.286188	0.0422603	Both to location and cell type
ENSG00000087448	0.718977	0	0.281023	High across cell type family
ENSG00000087460	0.905534	0.0659532	0.0285128	High across cell type family
ENSG00000087470	0.875065	0	0.124935	High across cell type family
ENSG00000087494	0.307008	0.104265	0.588727	High across cell type family
ENSG00000087495	0.659304	7.6303e-11	0.340696	High across cell type family
ENSG00000087502	0.742207	0	0.257793	High across cell type family
ENSG00000087510	0.767857	0.0120946	0.220048	High across cell type family
ENSG00000087586	0.16492	0	0.83508	None
ENSG00000087589	0.254904	0	0.745096	High across cell type family
ENSG00000087842	0.820231	0	0.179769	High across cell type family
ENSG00000087884	0.966211	0.00962775	0.0241611	High across cell type family
ENSG00000087903	0.97696	0	0.0230398	High across cell type family
ENSG00000087995	0.568984	0.26113	0.169885	Both to location and cell type
ENSG00000088002	0.678147	0.211722	0.11013	High across cell type family
ENSG00000088035	0.209198	0.275981	0.514821	High across location
ENSG00000088038	0.80749	0.107168	0.0853417	High across cell type family
ENSG00000088053	0.959504	0	0.0404958	High across cell type family
ENSG00000088179	0.51642	0	0.48358	High across cell type family
ENSG00000088205	0.296669	0.0775146	0.625817	High across cell type family
ENSG00000088247	0	0.0153665	0.984633	None
ENSG00000088256	0.521303	0.0951336	0.383563	High across cell type family
ENSG00000088280	0.960096	0.00990212	0.0300021	High across cell type family
ENSG00000088298	0.0177914	0.889641	0.0925675	High across location
ENSG00000088305	0	0	1	None
ENSG00000088320	0.126031	0	0.873969	None
ENSG00000088325	0.282634	0.371112	0.346254	Both to location and cell type
ENSG00000088356	0	0.0286637	0.971336	None
ENSG00000088367	0	0	1	None
ENSG00000088386	0	0.842243	0.157757	High across location
ENSG00000088387	0.884428	0.0356642	0.0799083	High across cell type family
ENSG00000088448	0.191087	0	0.808913	None
ENSG00000088451	0.360636	0	0.639364	High across cell type family
ENSG00000088538	0.943899	0.0492646	0.0068365	High across cell type family
ENSG00000088543	0	0.0235438	0.976456	None
ENSG00000088682	0.923334	0	0.0766657	High across cell type family
ENSG00000088726	0	0.676378	0.323622	High across location
ENSG00000088727	0.203303	0.232017	0.56468	None
ENSG00000088756	0.89034	0.0477713	0.0618886	High across cell type family
ENSG00000088766	0.677105	0.0472569	0.275638	High across cell type family
ENSG00000088782	0	0.150207	0.849793	None
ENSG00000088808	0.575441	0.31149	0.113068	Both to location and cell type
ENSG00000088812	0.383423	0.259858	0.356719	Both to location and cell type
ENSG00000088826	0.985758	1.6434e-11	0.0142417	High across cell type family
ENSG00000088827	0.0134713	0.726513	0.260016	High across location
ENSG00000088832	0.784675	0.145938	0.0693865	High across cell type family
ENSG00000088833	0	0.340019	0.659981	High across location
ENSG00000088836	0.530046	0.0483379	0.421616	High across cell type family
ENSG00000088854	0.911294	0.00517294	0.0835326	High across cell type family
ENSG00000088876	0.560426	1.55266e-10	0.439574	High across cell type family
ENSG00000088881	0.601929	0.0857889	0.312282	High across cell type family
ENSG00000088882	0.155105	0	0.844895	None
ENSG00000088888	0.869768	0	0.130232	High across cell type family
ENSG00000088899	0.546069	0.196958	0.256973	High across cell type family
ENSG00000088926	2.01799e-09	0.21961	0.78039	None
ENSG00000088930	0.44997	0.126208	0.423822	High across cell type family
ENSG00000088970	0.63678	8.85643e-10	0.36322	High across cell type family
ENSG00000088986	2.23176e-19	0.266909	0.733091	High across location
ENSG00000088992	0.54792	0.273488	0.178592	Both to location and cell type
ENSG00000089006	0.622207	0.0854791	0.292314	High across cell type family
ENSG00000089009	0.747908	0.0114012	0.240691	High across cell type family
ENSG00000089012	0.318256	0	0.681744	High across cell type family
ENSG00000089022	0.320633	0	0.679367	High across cell type family
ENSG00000089041	0.845019	0	0.154981	High across cell type family
ENSG00000089048	0.879713	0.0938126	0.0264743	High across cell type family
ENSG00000089050	0.597515	0.0537849	0.348701	High across cell type family
ENSG00000089053	0.685501	0.215061	0.0994383	High across cell type family
ENSG00000089057	0.950231	0.0243881	0.0253807	High across cell type family
ENSG00000089060	0.840472	0.00421637	0.155312	High across cell type family
ENSG00000089063	0.688418	0.0570114	0.254571	High across cell type family
ENSG00000089091	0.570498	0.0804831	0.349019	High across cell type family
ENSG00000089094	1.92814e-10	0.19585	0.80415	None
ENSG00000089101	0	0	1	None
ENSG00000089116	0.342131	0.163096	0.494773	High across cell type family
ENSG00000089123	0.899738	0.0719347	0.0283274	High across cell type family
ENSG00000089127	0	0.551306	0.448694	High across location
ENSG00000089154	0.835863	0	0.164137	High across cell type family
ENSG00000089157	0.290787	3.11839e-09	0.709213	High across cell type family
ENSG00000089159	0.817524	0	0.182476	High across cell type family
ENSG00000089163	0.826375	0.0814061	0.0922186	High across cell type family
ENSG00000089169	0.640569	0.0117977	0.347633	High across cell type family
ENSG00000089177	0.563908	0.107914	0.328178	High across cell type family
ENSG00000089195	0.984083	0.0128163	0.00310107	High across cell type family
ENSG00000089199	0.919418	0	0.0805823	High across cell type family
ENSG00000089220	0.452914	9.08553e-11	0.547086	High across cell type family
ENSG00000089225	0.563768	0	0.436232	High across cell type family
ENSG00000089234	0	0	1	None
ENSG00000089248	0.89304	0.000239469	0.106721	High across cell type family
ENSG00000089250	0.862442	0.0197439	0.117814	High across cell type family
ENSG00000089280	0.252675	0.52903	0.218296	Both to location and cell type
ENSG00000089289	0.387756	0	0.612244	High across cell type family
ENSG00000089327	0.716285	0	0.283715	High across cell type family
ENSG00000089335	0.853302	4.06074e-11	0.146698	High across cell type family
ENSG00000089351	0.940329	0.028061	0.0316101	High across cell type family
ENSG00000089356	0.984667	0	0.015333	High across cell type family
ENSG00000089472	0.895359	0	0.104641	High across cell type family
ENSG00000089486	0.804964	0	0.195036	High across cell type family
ENSG00000089505	0	0.332754	0.667246	High across location
ENSG00000089558	0.0451096	0.04823	0.90666	None
ENSG00000089597	0.97064	0.0140846	0.0152751	High across cell type family
ENSG00000089639	0.880127	0.0975631	0.0223099	High across cell type family
ENSG00000089682	0	0	1	None
ENSG00000089685	0	0	1	None
ENSG00000089692	0	0	1	None
ENSG00000089693	0.835032	0	0.164968	High across cell type family
ENSG00000089723	0.418683	0.051208	0.530109	High across cell type family
ENSG00000089737	0.834753	0.0567324	0.108515	High across cell type family
ENSG00000089775	0.773237	0	0.226763	High across cell type family
ENSG00000089818	0.933531	0.0212165	0.045252	High across cell type family
ENSG00000089820	6.95935e-10	0.549255	0.450745	High across location
ENSG00000089847	0.850867	0	0.149133	High across cell type family
ENSG00000089876	0.233577	0	0.766423	None
ENSG00000089902	0.865438	0	0.134562	High across cell type family
ENSG00000089916	0.577593	0.0425791	0.379828	High across cell type family
ENSG00000090006	0.670616	0	0.329384	High across cell type family
ENSG00000090013	0.232408	0.362915	0.404677	High across location
ENSG00000090020	0.678015	0.0158693	0.306116	High across cell type family
ENSG00000090054	0	0	1	None
ENSG00000090060	0.759824	0.0509751	0.189201	High across cell type family
ENSG00000090061	0.798691	0	0.201309	High across cell type family
ENSG00000090097	0.553462	1.76564e-09	0.446538	High across cell type family
ENSG00000090104	0.709843	0.187277	0.10288	High across cell type family
ENSG00000090238	0.478767	0	0.521233	High across cell type family
ENSG00000090263	1.75773e-09	0.585632	0.414368	High across location
ENSG00000090266	0.21656	0	0.78344	None
ENSG00000090273	0.572879	0.190485	0.236636	High across cell type family
ENSG00000090316	0	0	1	None
ENSG00000090339	0.884493	0	0.115507	High across cell type family
ENSG00000090372	0	0.55117	0.44883	High across location
ENSG00000090376	0	0.502987	0.497013	High across location
ENSG00000090382	0.233516	0.00195009	0.764534	None
ENSG00000090402	0.972804	0	0.0271958	High across cell type family
ENSG00000090432	0	0	1	None
ENSG00000090447	0	0	1	None
ENSG00000090470	0.841858	0	0.158142	High across cell type family
ENSG00000090487	0.629107	0	0.370893	High across cell type family
ENSG00000090512	0.257789	0	0.742211	High across cell type family
ENSG00000090520	0.559278	0.117818	0.322904	High across cell type family
ENSG00000090530	0	0.178757	0.821243	None
ENSG00000090534	0.302898	0.494781	0.20232	Both to location and cell type
ENSG00000090539	0.222496	3.25759e-10	0.777504	None
ENSG00000090554	0.959264	0.0179742	0.0227621	High across cell type family
ENSG00000090565	0	0	1	None
ENSG00000090581	0.935955	0	0.0640445	High across cell type family
ENSG00000090612	0.448452	0	0.551548	High across cell type family
ENSG00000090615	0.22554	1.59958e-15	0.77446	None
ENSG00000090621	0.960071	0.0328834	0.00704531	High across cell type family
ENSG00000090659	0.133906	0.188922	0.677171	None
ENSG00000090661	0	0	1	None
ENSG00000090674	0	0.317329	0.682671	High across location
ENSG00000090686	0	0.31574	0.68426	High across location
ENSG00000090776	3.08924e-09	0.0664735	0.933526	None
ENSG00000090857	0.674253	0	0.325747	High across cell type family
ENSG00000090861	0.880454	0.0346156	0.0849308	High across cell type family
ENSG00000090863	0.64888	0.00831699	0.342803	High across cell type family
ENSG00000090889	0.144813	0.168777	0.68641	None
ENSG00000090905	0.469501	0	0.530499	High across cell type family
ENSG00000090924	0.612278	0.228227	0.159495	High across cell type family
ENSG00000090932	0.922945	0.0163014	0.0607535	High across cell type family
ENSG00000090971	0.76958	0.000520468	0.2299	High across cell type family
ENSG00000090975	0.75055	0	0.24945	High across cell type family
ENSG00000090989	0.803245	0	0.196755	High across cell type family
ENSG00000091009	0.149366	0	0.850634	None
ENSG00000091010	1.85385e-10	0.748216	0.251784	High across location
ENSG00000091039	0.862866	0.0462766	0.0908578	High across cell type family
ENSG00000091073	0	0.0393927	0.960607	None
ENSG00000091106	0.931395	0	0.0686049	High across cell type family
ENSG00000091127	0.927688	0	0.0723124	High across cell type family
ENSG00000091128	0.678322	0	0.321678	High across cell type family
ENSG00000091129	0.921898	0.00148976	0.076612	High across cell type family
ENSG00000091136	0.902153	0	0.0978467	High across cell type family
ENSG00000091137	0	0	1	None
ENSG00000091138	0.425211	0	0.574789	High across cell type family
ENSG00000091140	0.878426	0	0.121574	High across cell type family
ENSG00000091157	0.533017	0.0800137	0.386969	High across cell type family
ENSG00000091164	0.899723	1.62505e-10	0.100277	High across cell type family
ENSG00000091181	0.657939	0.0590383	0.283023	High across cell type family
ENSG00000091262	0.930664	0.0530394	0.0162969	High across cell type family
ENSG00000091317	0.470342	0.0460571	0.483601	High across cell type family
ENSG00000091409	0.949561	0.039614	0.010825	High across cell type family
ENSG00000091428	0.996405	0.00152892	0.00206653	High across cell type family
ENSG00000091436	0.511972	0.163558	0.32447	High across cell type family
ENSG00000091482	0.478905	0.246444	0.274651	High across cell type family
ENSG00000091483	0.445552	0.513486	0.040962	Both to location and cell type
ENSG00000091490	0	0.0944849	0.905515	None
ENSG00000091513	0.911711	0.0268084	0.0614806	High across cell type family
ENSG00000091527	0.500973	0.464399	0.0346282	Both to location and cell type
ENSG00000091536	0.807844	0.0501261	0.14203	High across cell type family
ENSG00000091542	0.467049	0.00154882	0.531402	High across cell type family
ENSG00000091583	0	0	1	None
ENSG00000091592	0.567522	0.102664	0.329814	High across cell type family
ENSG00000091622	0.926679	0.0141108	0.0592103	High across cell type family
ENSG00000091640	9.28814e-17	0.27819	0.72181	High across location
ENSG00000091651	0.706539	0	0.293461	High across cell type family
ENSG00000091656	0	0.0759281	0.924072	None
ENSG00000091664	0.122093	0.583597	0.29431	High across location
ENSG00000091704	0	0.362965	0.637035	High across location
ENSG00000091732	0	0	1	None
ENSG00000091831	0	0.605671	0.394329	High across location
ENSG00000091844	0.876175	0.0430893	0.0807359	High across cell type family
ENSG00000091879	0.0211971	0.277276	0.701527	High across location
ENSG00000091947	0.531511	9.28066e-17	0.468489	High across cell type family
ENSG00000091972	0.953533	0.0288766	0.0175908	High across cell type family
ENSG00000091986	0.975371	0.0204346	0.0041947	High across cell type family
ENSG00000092010	0.0189243	0.302172	0.678904	High across location
ENSG00000092020	0.817131	0	0.182869	High across cell type family
ENSG00000092036	0.543477	0.31638	0.140143	Both to location and cell type
ENSG00000092051	0.80698	0	0.19302	High across cell type family
ENSG00000092054	0.903766	0.0310777	0.0651566	High across cell type family
ENSG00000092067	0	0.150207	0.849793	None
ENSG00000092068	0.582058	0	0.417942	High across cell type family
ENSG00000092094	0.683775	1.29924e-10	0.316225	High across cell type family
ENSG00000092096	0.983764	1.75672e-11	0.0162356	High across cell type family
ENSG00000092098	0.749162	0.159658	0.0911794	High across cell type family
ENSG00000092108	0.795646	0.156419	0.0479352	High across cell type family
ENSG00000092140	0.799145	0.00585304	0.195002	High across cell type family
ENSG00000092148	0.458011	0	0.541989	High across cell type family
ENSG00000092199	0	0	1	None
ENSG00000092200	0	0.541433	0.458567	High across location
ENSG00000092201	0.673952	0.124867	0.201181	High across cell type family
ENSG00000092203	0	0	1	None
ENSG00000092208	0.140169	0	0.859831	None
ENSG00000092295	0.0743435	0.601063	0.324593	High across location
ENSG00000092330	0	0	1	None
ENSG00000092345	0.251449	0.10473	0.643822	High across cell type family
ENSG00000092377	0.157611	0	0.842389	None
ENSG00000092421	0.190638	0	0.809362	None
ENSG00000092439	0.240131	0	0.759869	None
ENSG00000092445	0.912442	0	0.0875578	High across cell type family
ENSG00000092470	0.326636	1.13151e-10	0.673364	High across cell type family
ENSG00000092529	0.929157	0.049327	0.0215156	High across cell type family
ENSG00000092531	0.987475	2.79209e-11	0.0125247	High across cell type family
ENSG00000092607	0.736695	0.218378	0.0449267	High across cell type family
ENSG00000092621	0.997808	0.000968644	0.0012237	High across cell type family
ENSG00000092758	0.822029	0	0.177971	High across cell type family
ENSG00000092820	0.970383	6.21613e-11	0.0296173	High across cell type family
ENSG00000092841	1.98217e-10	0	1	None
ENSG00000092847	0.745459	0.127824	0.126717	High across cell type family
ENSG00000092850	0.41268	0	0.58732	High across cell type family
ENSG00000092853	0.678122	1.07441e-08	0.321878	High across cell type family
ENSG00000092871	0.717728	0	0.282272	High across cell type family
ENSG00000092929	0.957425	1.75893e-11	0.0425748	High across cell type family
ENSG00000092931	0.512603	9.80252e-16	0.487397	High across cell type family
ENSG00000092964	0	0	1	None
ENSG00000092969	0.871222	0.039318	0.0894601	High across cell type family
ENSG00000092978	0	0.351776	0.648224	High across location
ENSG00000093000	0.816855	0	0.183145	High across cell type family
ENSG00000093009	0	0.000388979	0.999611	None
ENSG00000093010	0.629912	0	0.370088	High across cell type family
ENSG00000093072	0.824651	0.0564217	0.118928	High across cell type family
ENSG00000093144	0	0	1	None
ENSG00000093167	0	0.241857	0.758143	None
ENSG00000093183	0.921036	0	0.0789642	High across cell type family
ENSG00000093217	0.817179	0	0.182821	High across cell type family
ENSG00000094631	0.859257	0.0857813	0.0549616	High across cell type family
ENSG00000094755	0	0	1	None
ENSG00000094796	0.0695935	0.817717	0.11269	High across location
ENSG00000094804	0.506236	0	0.493764	High across cell type family
ENSG00000094841	0	0	1	None
ENSG00000094880	0	0.650577	0.349423	High across location
ENSG00000094914	0.952311	0.015353	0.0323356	High across cell type family
ENSG00000094916	0	0.276832	0.723168	High across location
ENSG00000094963	0.929865	0.0426989	0.0274361	High across cell type family
ENSG00000094975	0.564269	0.350504	0.0852263	Both to location and cell type
ENSG00000095002	0.971813	0	0.028187	High across cell type family
ENSG00000095015	0.321224	0.167371	0.511406	High across cell type family
ENSG00000095059	0.21284	0.451945	0.335215	High across location
ENSG00000095066	0.385658	0	0.614342	High across cell type family
ENSG00000095110	0	0	1	None
ENSG00000095139	0.720453	0	0.279547	High across cell type family
ENSG00000095203	0.34733	0	0.65267	High across cell type family
ENSG00000095209	0.889461	0.00455696	0.105982	High across cell type family
ENSG00000095261	0	0	1	None
ENSG00000095303	0	0	1	None
ENSG00000095319	0.937911	0.0492201	0.0128685	High across cell type family
ENSG00000095321	0.565696	0.313848	0.120456	Both to location and cell type
ENSG00000095370	0.983793	0	0.0162072	High across cell type family
[truncated: 16,647 more rows]

## Sheet: Hsap.AST-Glut
Table S5. LMM results for human astrocytes-Glut.
Gene	Cell type	location	Residual	Category
ENSG00000000003	0.962936	0.0252884	0.0117757	High across cell type family
ENSG00000000005	0.266079	0.0390053	0.694915	High across cell type family
ENSG00000000419	0	0.599998	0.400002	High across location
ENSG00000000457	0.797479	0.114514	0.088007	High across cell type family
ENSG00000000460	0.0796021	0	0.920398	None
ENSG00000000938	0.569668	0.088605	0.341727	High across cell type family
ENSG00000000971	0.790105	0	0.209895	High across cell type family
ENSG00000001036	0.442947	0.426138	0.130915	Both to location and cell type
ENSG00000001084	0.749973	0.0548055	0.195221	High across cell type family
ENSG00000001167	0.957195	0	0.0428051	High across cell type family
ENSG00000001460	0.680047	0.079236	0.240717	High across cell type family
ENSG00000001461	0.856385	0	0.143615	High across cell type family
ENSG00000001497	0.525546	0	0.474454	High across cell type family
ENSG00000001561	0.243541	0.518476	0.237983	High across location
ENSG00000001617	0.551786	0	0.448214	High across cell type family
ENSG00000001626	0.736052	0.0867632	0.177185	High across cell type family
ENSG00000001629	0.695604	0.237356	0.0670404	High across cell type family
ENSG00000001630	5.09283e-10	0.449943	0.550057	High across location
ENSG00000001631	0.373912	0.103477	0.522611	High across cell type family
ENSG00000002016	0.90695	0	0.09305	High across cell type family
ENSG00000002330	0.89331	0.0166271	0.0900632	High across cell type family
ENSG00000002549	0.827148	0	0.172852	High across cell type family
ENSG00000002586	0.933676	0.0354964	0.0308279	High across cell type family
ENSG00000002587	0.805239	0.1228	0.0719614	High across cell type family
ENSG00000002726	0.548549	6.76624e-11	0.451451	High across cell type family
ENSG00000002745	0.179158	0	0.820842	None
ENSG00000002746	0.975725	0.0233638	0.000911412	High across cell type family
ENSG00000002822	0.297047	0.489781	0.213172	Both to location and cell type
ENSG00000002834	0.385524	0	0.614476	High across cell type family
ENSG00000002919	0.291484	3.82553e-17	0.708516	High across cell type family
ENSG00000002933	0.926734	0.0313449	0.0419215	High across cell type family
ENSG00000003056	0.857853	4.09524e-09	0.142147	High across cell type family
ENSG00000003096	0.196062	0.483141	0.320798	High across location
ENSG00000003137	0	0.314209	0.685791	High across location
ENSG00000003147	0.970395	0.0118426	0.0177621	High across cell type family
ENSG00000003249	0.397178	0.201908	0.400914	High across cell type family
ENSG00000003393	0.833049	0	0.166951	High across cell type family
ENSG00000003400	0.867676	0.0777619	0.054562	High across cell type family
ENSG00000003402	0.66643	0.0320279	0.301542	High across cell type family
ENSG00000003436	0.00606386	0.6345	0.359436	High across location
ENSG00000003509	0.966547	0.0185268	0.0149258	High across cell type family
ENSG00000003756	0.779637	0.0937513	0.126612	High across cell type family
ENSG00000003987	0.96101	0.027872	0.011118	High across cell type family
ENSG00000003989	0.676028	0.0229543	0.301018	High across cell type family
ENSG00000004059	0.676764	0.281464	0.0417712	Both to location and cell type
ENSG00000004139	0.109493	0	0.890507	None
ENSG00000004142	0.163297	0	0.836703	None
ENSG00000004399	0.769855	0	0.230145	High across cell type family
ENSG00000004455	0.447303	0	0.552697	High across cell type family
ENSG00000004468	0.987383	3.52508e-11	0.0126174	High across cell type family
ENSG00000004478	0.719185	0.144665	0.136151	High across cell type family
ENSG00000004487	0.397611	0	0.602389	High across cell type family
ENSG00000004534	0.873269	0	0.126731	High across cell type family
ENSG00000004660	0.340297	0	0.659703	High across cell type family
ENSG00000004700	0.870855	0.104649	0.0244966	High across cell type family
ENSG00000004766	0.803808	0.0502795	0.145912	High across cell type family
ENSG00000004776	0.766439	0.18452	0.0490415	High across cell type family
ENSG00000004777	0.211995	0.68088	0.107126	High across location
ENSG00000004779	0.449092	0.218014	0.332894	High across cell type family
ENSG00000004799	0.955197	0	0.0448029	High across cell type family
ENSG00000004809	0	0	1	None
ENSG00000004838	0.704764	0	0.295236	High across cell type family
ENSG00000004846	0.207005	0.375668	0.417327	High across location
ENSG00000004848	0.343706	0	0.656294	High across cell type family
ENSG00000004864	0.814034	0.0356015	0.150365	High across cell type family
ENSG00000004866	0.635333	0	0.364667	High across cell type family
ENSG00000004897	0.9144	0.0108161	0.0747836	High across cell type family
ENSG00000004939	0	0	1	None
ENSG00000004948	0	0.341888	0.658112	High across location
ENSG00000004961	0.938704	0.0142375	0.0470585	High across cell type family
ENSG00000004975	0.781401	0.0463266	0.172272	High across cell type family
ENSG00000005001	0.333783	0.0416092	0.624608	High across cell type family
ENSG00000005007	0	0	1	None
ENSG00000005020	0.708081	0.0357568	0.256162	High across cell type family
ENSG00000005022	0	0	1	None
ENSG00000005059	0	0.204562	0.795438	None
ENSG00000005075	0.719659	2.81038e-11	0.280341	High across cell type family
ENSG00000005100	0.828561	0.039451	0.131988	High across cell type family
ENSG00000005102	0	0	1	None
ENSG00000005108	0.308859	0.12656	0.564581	High across cell type family
ENSG00000005156	0.445952	5.18373e-17	0.554048	High across cell type family
ENSG00000005175	0	0.257411	0.742589	High across location
ENSG00000005187	0.571392	0	0.428608	High across cell type family
ENSG00000005189	0.460516	0	0.539484	High across cell type family
ENSG00000005194	0.684321	0.0438833	0.271796	High across cell type family
ENSG00000005206	0.975383	1.25831e-11	0.0246171	High across cell type family
ENSG00000005238	0.948079	0	0.0519205	High across cell type family
ENSG00000005243	0.930928	0.0176308	0.0514409	High across cell type family
ENSG00000005249	0.826612	0.0861944	0.0871935	High across cell type family
ENSG00000005302	0	0	1	None
ENSG00000005339	0.943371	0	0.0566293	High across cell type family
ENSG00000005379	0.664613	0.0563946	0.278993	High across cell type family
ENSG00000005381	0.765546	0	0.234454	High across cell type family
ENSG00000005421	0.9902	0	0.00980029	High across cell type family
ENSG00000005436	0.726744	0	0.273256	High across cell type family
ENSG00000005448	0.934136	0.000366989	0.0654972	High across cell type family
ENSG00000005469	0.69235	0.0625513	0.245099	High across cell type family
ENSG00000005471	0.840711	0.142668	0.0166214	High across cell type family
ENSG00000005483	0	0.328957	0.671043	High across location
ENSG00000005486	0.776428	0	0.223572	High across cell type family
ENSG00000005513	0.748837	0	0.251163	High across cell type family
ENSG00000005700	0.961841	0.0214764	0.0166821	High across cell type family
ENSG00000005801	0.762964	0.00133843	0.235697	High across cell type family
ENSG00000005810	0.969416	0	0.0305839	High across cell type family
ENSG00000005812	0.832158	0.103692	0.0641502	High across cell type family
ENSG00000005844	0.576482	0.31787	0.105649	Both to location and cell type
ENSG00000005882	0	0.57114	0.42886	High across location
ENSG00000005884	0.482926	0	0.517074	High across cell type family
ENSG00000005889	0.83396	0.0899421	0.0760978	High across cell type family
ENSG00000005893	0.973198	5.84435e-12	0.0268024	High across cell type family
ENSG00000005961	0.797557	0.172356	0.0300872	High across cell type family
ENSG00000005981	0.823161	0.055374	0.121465	High across cell type family
ENSG00000006007	0.749483	0	0.250517	High across cell type family
ENSG00000006015	0.955516	0.0295772	0.0149067	High across cell type family
ENSG00000006016	1.95373e-10	0.705565	0.294435	High across location
ENSG00000006025	0.838548	3.37404e-09	0.161452	High across cell type family
ENSG00000006042	0.854068	0.0206408	0.125291	High across cell type family
ENSG00000006047	0	0	1	None
ENSG00000006059	0.751372	0.12865	0.119978	High across cell type family
ENSG00000006062	0.889128	0	0.110872	High across cell type family
ENSG00000006071	0	0	1	None
ENSG00000006116	0.613875	0.180615	0.20551	High across cell type family
ENSG00000006118	0.975516	0.0203224	0.00416192	High across cell type family
ENSG00000006125	0.956154	0.00806036	0.0357857	High across cell type family
ENSG00000006128	0.173353	0.193386	0.633261	None
ENSG00000006194	0.165022	0	0.834978	None
ENSG00000006210	0.22823	0	0.77177	None
ENSG00000006282	0.673395	0	0.326605	High across cell type family
ENSG00000006283	0.650064	0.194936	0.155	High across cell type family
ENSG00000006327	0	0	1	None
ENSG00000006377	0	0.124725	0.875275	None
ENSG00000006432	0.960136	0.0156291	0.0242344	High across cell type family
ENSG00000006451	0.901936	0	0.0980641	High across cell type family
ENSG00000006453	0	0.27094	0.72906	High across location
ENSG00000006459	1.26282e-08	0.400812	0.599188	High across location
ENSG00000006468	0	0	1	None
ENSG00000006530	1.91746e-10	0.827209	0.172791	High across location
ENSG00000006534	0.900927	0.022853	0.0762197	High across cell type family
ENSG00000006555	0.381846	0.280408	0.337746	Both to location and cell type
ENSG00000006576	0.840629	0.0948698	0.064501	High across cell type family
ENSG00000006606	9.80914e-05	0.206357	0.793545	None
ENSG00000006607	0.0532669	1.14529e-20	0.946733	None
ENSG00000006611	0.790032	0	0.209968	High across cell type family
ENSG00000006625	0.420612	0.337708	0.24168	Both to location and cell type
ENSG00000006634	0.668867	0	0.331133	High across cell type family
ENSG00000006638	0.029702	0.797905	0.172393	High across location
ENSG00000006652	0.914134	0	0.0858656	High across cell type family
ENSG00000006659	0.743994	0.0770051	0.179001	High across cell type family
ENSG00000006695	0	0	1	None
ENSG00000006704	0.468048	0.261792	0.270159	Both to location and cell type
ENSG00000006712	0.02292	0.201356	0.775725	None
ENSG00000006715	6.46509e-11	0.502496	0.497504	High across location
ENSG00000006740	0.975605	0.0192245	0.00517021	High across cell type family
ENSG00000006744	0	0.551537	0.448463	High across location
ENSG00000006747	0	0.345847	0.654153	High across location
ENSG00000006756	0.803641	0	0.196359	High across cell type family
ENSG00000006757	0.290925	0.27757	0.431505	Both to location and cell type
ENSG00000006788	0.427646	0.125644	0.44671	High across cell type family
ENSG00000006831	0.636254	0	0.363746	High across cell type family
ENSG00000006837	0.9744	0.0110619	0.0145378	High across cell type family
ENSG00000007001	0.33097	0	0.66903	High across cell type family
ENSG00000007038	0	0.551236	0.448764	High across location
ENSG00000007047	0.239341	0.00235329	0.758306	None
ENSG00000007062	0.426491	0	0.573509	High across cell type family
ENSG00000007080	0.696354	0.0616792	0.241967	High across cell type family
ENSG00000007129	0.434551	0	0.565449	High across cell type family
ENSG00000007168	0.934513	0.0348544	0.0306323	High across cell type family
ENSG00000007171	0.52845	0.0182871	0.453263	High across cell type family
ENSG00000007174	0	0.013382	0.986618	None
ENSG00000007202	0	0	1	None
ENSG00000007216	0	0.0205742	0.979426	None
ENSG00000007237	0	0	1	None
ENSG00000007255	0.931246	0	0.0687544	High across cell type family
ENSG00000007264	0.883381	0.0152707	0.101348	High across cell type family
ENSG00000007306	0.192141	0	0.807859	None
ENSG00000007312	0	0	1	None
ENSG00000007314	0.302612	2.41085e-17	0.697388	High across cell type family
ENSG00000007341	0.95767	0.029341	0.0129892	High across cell type family
ENSG00000007350	0.260622	0	0.739378	High across cell type family
ENSG00000007372	0.692708	0.015926	0.291366	High across cell type family
ENSG00000007376	0.522419	0.0519236	0.425657	High across cell type family
ENSG00000007384	0.963799	0.00749777	0.0287032	High across cell type family
ENSG00000007392	0.746445	0	0.253555	High across cell type family
ENSG00000007402	0.249172	0.281406	0.469422	High across location
ENSG00000007516	2.52622e-08	0.183986	0.816014	None
ENSG00000007520	0	0.204839	0.795161	None
ENSG00000007541	0.492305	0	0.507695	High across cell type family
ENSG00000007545	0	0	1	None
ENSG00000007866	0.991274	0.00741079	0.00131497	High across cell type family
ENSG00000007908	0	0	1	None
ENSG00000007923	0	0	1	None
ENSG00000007933	0.506678	0.161808	0.331514	High across cell type family
ENSG00000007944	0.300801	0	0.699199	High across cell type family
ENSG00000007952	0.0242057	0.0236004	0.952194	None
ENSG00000007968	0.109927	0.409739	0.480334	High across location
ENSG00000008018	0.594109	0.108811	0.29708	High across cell type family
ENSG00000008056	0.965919	0	0.0340812	High across cell type family
ENSG00000008083	0.64677	6.35616e-10	0.35323	High across cell type family
ENSG00000008086	0.548141	0.21636	0.235499	High across cell type family
ENSG00000008118	0.857443	0.0235704	0.118986	High across cell type family
ENSG00000008128	0.856644	0.106594	0.0367611	High across cell type family
ENSG00000008130	0.368921	0.018061	0.613018	High across cell type family
ENSG00000008196	0	0.0632012	0.936799	None
ENSG00000008197	0.607226	0	0.392774	High across cell type family
ENSG00000008226	0.701236	9.27284e-08	0.298764	High across cell type family
ENSG00000008256	0.256831	0	0.743169	High across cell type family
ENSG00000008277	0.753101	0.142039	0.104859	High across cell type family
ENSG00000008282	0.986206	0	0.013794	High across cell type family
ENSG00000008283	0.849424	0	0.150576	High across cell type family
ENSG00000008294	0.903772	0.0103608	0.0858668	High across cell type family
ENSG00000008300	0.984154	0	0.0158465	High across cell type family
ENSG00000008311	0.983026	0	0.0169739	High across cell type family
ENSG00000008323	0.527519	0	0.472481	High across cell type family
ENSG00000008324	0.955038	0	0.0449615	High across cell type family
ENSG00000008382	0.837205	0	0.162795	High across cell type family
ENSG00000008394	0.702536	0	0.297464	High across cell type family
ENSG00000008405	0.365255	0.368333	0.266412	Both to location and cell type
ENSG00000008438	0.925407	0	0.0745928	High across cell type family
ENSG00000008441	0.451196	1.68028e-08	0.548804	High across cell type family
ENSG00000008513	0.403558	0.268974	0.327468	Both to location and cell type
ENSG00000008516	0.792772	0.151235	0.0559921	High across cell type family
ENSG00000008517	0.0914607	4.86723e-20	0.908539	None
ENSG00000008710	0.721073	0	0.278927	High across cell type family
ENSG00000008735	0.969948	0.0131653	0.0168871	High across cell type family
ENSG00000008838	1.92482e-18	0	1	None
ENSG00000008853	0.252056	3.00171e-15	0.747944	High across cell type family
ENSG00000008869	0.940834	8.11304e-17	0.0591665	High across cell type family
ENSG00000008952	0.751534	0	0.248466	High across cell type family
ENSG00000008988	0.3822	0.600784	0.0170158	Both to location and cell type
ENSG00000009307	0.832015	0.0108606	0.157125	High across cell type family
ENSG00000009335	0.737839	0.0685442	0.193617	High across cell type family
ENSG00000009413	0.921507	0	0.0784934	High across cell type family
ENSG00000009694	0.736917	0.0944094	0.168674	High across cell type family
ENSG00000009709	2.70015e-09	0	1	None
ENSG00000009724	0	0.541442	0.458558	High across location
ENSG00000009765	0.436795	0.0807576	0.482448	High across cell type family
ENSG00000009780	0.506548	0.445469	0.047983	Both to location and cell type
ENSG00000009790	0	0	1	None
ENSG00000009830	0.956715	0.00404034	0.0392444	High across cell type family
ENSG00000009844	0.788286	0	0.211714	High across cell type family
ENSG00000009950	0.993944	0.00463423	0.0014214	High across cell type family
ENSG00000009954	0.921315	0.0523287	0.0263559	High across cell type family
ENSG00000010017	0.0771697	0.576825	0.346005	High across location
ENSG00000010030	2.99707e-09	0.120788	0.879212	None
ENSG00000010072	0	0	1	None
ENSG00000010165	0.762779	0.182108	0.0551122	High across cell type family
ENSG00000010219	0.543755	0.344586	0.111659	Both to location and cell type
ENSG00000010244	0.87542	0.0237036	0.100877	High across cell type family
ENSG00000010256	0.637309	0.167682	0.195009	High across cell type family
ENSG00000010270	0.695758	0.00172343	0.302518	High across cell type family
ENSG00000010278	0.9911	0.00330521	0.00559506	High across cell type family
ENSG00000010282	0.912899	0.0273566	0.0597446	High across cell type family
ENSG00000010292	0.803814	0	0.196186	High across cell type family
ENSG00000010295	0.038232	0	0.961768	None
ENSG00000010310	0.250674	0.272971	0.476355	Both to location and cell type
ENSG00000010318	0.87753	0.0583006	0.0641695	High across cell type family
ENSG00000010319	0	0.229416	0.770584	None
ENSG00000010322	0.469433	0.0341339	0.496433	High across cell type family
ENSG00000010327	0.596411	0.125278	0.278311	High across cell type family
ENSG00000010361	0.928041	0.0459625	0.0259966	High across cell type family
ENSG00000010379	0	0.842361	0.157639	High across location
ENSG00000010404	0.977445	0.0102379	0.0123175	High across cell type family
ENSG00000010438	0.938327	0	0.0616727	High across cell type family
ENSG00000010539	0.152259	0	0.847741	None
ENSG00000010610	0	0	1	None
ENSG00000010626	0.807766	0.0513059	0.140928	High across cell type family
ENSG00000010671	0.720559	0	0.279441	High across cell type family
ENSG00000010704	0.940112	0	0.0598883	High across cell type family
ENSG00000010803	0.424094	0	0.575906	High across cell type family
ENSG00000010810	0.989121	0.00504037	0.00583872	High across cell type family
ENSG00000010818	0.875024	0	0.124976	High across cell type family
ENSG00000010932	0.0690996	9.32385e-10	0.9309	None
ENSG00000011007	1.77195e-09	0.793126	0.206874	High across location
ENSG00000011009	0.0870328	0	0.912967	None
ENSG00000011021	0.853135	7.04391e-11	0.146865	High across cell type family
ENSG00000011028	0.97935	0	0.02065	High across cell type family
ENSG00000011052	0.0673133	0	0.932687	None
ENSG00000011083	0.93477	0.0583351	0.00689443	High across cell type family
ENSG00000011105	0.484544	0	0.515456	High across cell type family
ENSG00000011114	0.837002	0	0.162998	High across cell type family
ENSG00000011132	0.850956	0	0.149044	High across cell type family
ENSG00000011143	0.967451	0	0.0325487	High across cell type family
ENSG00000011198	0.917864	0	0.0821355	High across cell type family
ENSG00000011201	0.896595	0.0303705	0.0730344	High across cell type family
ENSG00000011243	0.492168	0	0.507832	High across cell type family
ENSG00000011258	0.840919	0.0103293	0.148752	High across cell type family
ENSG00000011260	0.739028	0	0.260972	High across cell type family
ENSG00000011275	0.706523	0.156144	0.137333	High across cell type family
ENSG00000011295	0.478917	0.0572082	0.463875	High across cell type family
ENSG00000011304	0.652033	0.0246522	0.323315	High across cell type family
ENSG00000011332	0.240726	0.197788	0.561486	None
ENSG00000011347	0.92978	0.0553213	0.0148988	High across cell type family
ENSG00000011376	0.489809	0.117337	0.392854	High across cell type family
ENSG00000011405	0.932224	0	0.067776	High across cell type family
ENSG00000011422	0	0.247617	0.752383	None
ENSG00000011426	0.644227	0.153326	0.202448	High across cell type family
ENSG00000011451	0.838288	0.0373007	0.124411	High across cell type family
ENSG00000011454	0.0156342	0.775049	0.209317	High across location
ENSG00000011465	0	0	1	None
ENSG00000011478	0.833886	0.0110758	0.155038	High across cell type family
ENSG00000011485	0.897255	0	0.102745	High across cell type family
ENSG00000011523	0.248448	0	0.751552	None
ENSG00000011566	0.0610223	0	0.938978	None
ENSG00000011590	0.677898	0	0.322102	High across cell type family
ENSG00000011600	0.905698	0.0442182	0.0500833	High across cell type family
ENSG00000011638	0.586257	0.0364184	0.377324	High across cell type family
ENSG00000011677	0.911873	0.0483862	0.039741	High across cell type family
ENSG00000012048	0.948329	0.0465752	0.00509537	High across cell type family
ENSG00000012061	0.700595	0.0540636	0.245342	High across cell type family
ENSG00000012124	0.873312	0.053011	0.0736775	High across cell type family
ENSG00000012171	0.99632	0.0015676	0.00211255	High across cell type family
ENSG00000012174	0.440268	0	0.559732	High across cell type family
ENSG00000012211	0.995101	0	0.00489895	High across cell type family
ENSG00000012223	0.959098	0.0399703	0.000931351	High across cell type family
ENSG00000012232	0.222406	0.149116	0.628478	None
ENSG00000012504	0.206313	0	0.793687	None
ENSG00000012660	0.781409	0	0.218591	High across cell type family
ENSG00000012779	0.0858351	0.0207555	0.893409	None
ENSG00000012817	0.899487	0.0707064	0.0298064	High across cell type family
ENSG00000012822	0.543367	0.11236	0.344273	High across cell type family
ENSG00000012963	0.228609	0	0.771391	None
ENSG00000012983	0.888595	0.0814984	0.0299068	High across cell type family
ENSG00000013016	0.866965	0.00433039	0.128705	High across cell type family
ENSG00000013275	0.651149	0.204882	0.143969	High across cell type family
ENSG00000013288	0.32884	0	0.67116	High across cell type family
ENSG00000013293	0.8933	0	0.1067	High across cell type family
ENSG00000013297	0.806786	2.68018e-08	0.193214	High across cell type family
ENSG00000013306	0.370788	0	0.629212	High across cell type family
ENSG00000013364	0.947087	0.0153733	0.0375397	High across cell type family
ENSG00000013374	4.52769e-19	0.253158	0.746842	High across location
ENSG00000013375	0.787806	3.37452e-11	0.212194	High across cell type family
ENSG00000013392	0.800235	0.106256	0.0935085	High across cell type family
ENSG00000013441	0.976427	9.79055e-11	0.0235727	High across cell type family
ENSG00000013503	0.621633	1.35884e-09	0.378367	High across cell type family
ENSG00000013523	0.840848	0.139672	0.01948	High across cell type family
ENSG00000013561	0.825841	0.0545918	0.119567	High across cell type family
ENSG00000013563	0.0120417	0.805034	0.182924	High across location
ENSG00000013573	0	0.0424391	0.957561	None
ENSG00000013583	0	0.489071	0.510929	High across location
ENSG00000013588	2.43661e-07	0.228118	0.771882	None
ENSG00000013619	0.818231	3.83493e-16	0.181769	High across cell type family
ENSG00000013725	0.369587	0.136703	0.49371	High across cell type family
ENSG00000013810	0	0	1	None
ENSG00000014123	0.995609	0	0.00439108	High across cell type family
ENSG00000014138	0	0	1	None
ENSG00000014164	0.496366	0.059117	0.444517	High across cell type family
ENSG00000014216	0.0735145	0.175985	0.750501	None
ENSG00000014257	0.367526	0.107505	0.524969	High across cell type family
ENSG00000014641	0.947475	0.0224954	0.0300293	High across cell type family
ENSG00000014824	0.30624	0.297162	0.396598	Both to location and cell type
ENSG00000014914	0.687618	0	0.312382	High across cell type family
ENSG00000014919	0.232962	0	0.767038	None
ENSG00000015133	0.757275	0.137329	0.105396	High across cell type family
ENSG00000015153	0.147645	0	0.852355	None
ENSG00000015171	0.749924	0	0.250076	High across cell type family
ENSG00000015285	0.89712	0	0.10288	High across cell type family
ENSG00000015413	0.522372	2.17477e-10	0.477628	High across cell type family
ENSG00000015475	0.313953	9.15273e-11	0.686047	High across cell type family
ENSG00000015479	0.713614	0.107868	0.178518	High across cell type family
ENSG00000015520	0	0.33698	0.66302	High across location
ENSG00000015532	0.892635	0.0444078	0.0629568	High across cell type family
ENSG00000015568	7.67079e-07	0.806449	0.193551	High across location
ENSG00000015592	0.928454	0.00721445	0.0643311	High across cell type family
ENSG00000015676	0.762117	0.218111	0.019772	High across cell type family
ENSG00000016082	1.35144e-08	0.0888562	0.911144	None
ENSG00000016391	0.968521	0.0138154	0.0176631	High across cell type family
ENSG00000016402	0.933072	0.0319975	0.0349309	High across cell type family
ENSG00000016490	0	0	1	None
ENSG00000016602	0	0.811069	0.188931	High across location
ENSG00000016864	0	0.368739	0.631261	High across location
ENSG00000017260	0.215195	0.203018	0.581787	None
ENSG00000017427	0.710664	0	0.289336	High across cell type family
ENSG00000017483	5.29746e-15	2.01112e-16	1	None
ENSG00000017797	0.776692	0.14563	0.0776772	High across cell type family
ENSG00000018189	0.949399	0.0126346	0.0379663	High across cell type family
ENSG00000018236	0.780866	0	0.219134	High across cell type family
ENSG00000018280	0.654756	0.243015	0.102229	High across cell type family
ENSG00000018408	0.977774	0.00392785	0.0182983	High across cell type family
ENSG00000018510	0.938251	0	0.0617491	High across cell type family
ENSG00000018610	0.934797	0.0458608	0.0193421	High across cell type family
ENSG00000018625	0.975735	0.00282311	0.0214423	High across cell type family
ENSG00000018699	0	0.329817	0.670183	High across location
ENSG00000018869	0.921246	8.68467e-12	0.0787544	High across cell type family
ENSG00000019102	0.832203	0.0178693	0.149928	High across cell type family
ENSG00000019144	0.966319	8.73555e-11	0.0336808	High across cell type family
ENSG00000019169	0.302651	0	0.697349	High across cell type family
ENSG00000019186	0.0083736	0.589233	0.402394	High across location
ENSG00000019485	0.831587	0	0.168413	High across cell type family
ENSG00000019505	0.92489	0.0148121	0.0602983	High across cell type family
ENSG00000019549	0	0.0582508	0.941749	None
ENSG00000019582	0.7237	0.204367	0.071933	High across cell type family
ENSG00000019991	1.53304e-09	0.29517	0.70483	High across location
ENSG00000019995	0.972571	0	0.0274288	High across cell type family
ENSG00000020129	0.8792	0.0838066	0.0369933	High across cell type family
ENSG00000020181	0.941882	0.0214704	0.0366476	High across cell type family
ENSG00000020256	0.890594	0.100483	0.00892346	High across cell type family
ENSG00000020426	0.944315	0.0440112	0.011674	High across cell type family
ENSG00000020577	0.852579	0.0648028	0.0826183	High across cell type family
ENSG00000020633	0.560296	0.1294	0.310304	High across cell type family
ENSG00000020922	0	0	1	None
ENSG00000021300	0.963612	0.00988672	0.0265009	High across cell type family
ENSG00000021355	0	0.365397	0.634603	High across location
ENSG00000021461	0.687354	0.0430019	0.269644	High across cell type family
ENSG00000021488	0.0688949	0.00875205	0.922353	None
ENSG00000021574	0.616445	0	0.383555	High across cell type family
ENSG00000021645	0.269709	0	0.730291	High across cell type family
ENSG00000021762	0.507924	0.0193305	0.472746	High across cell type family
ENSG00000021776	0.962263	0.0306538	0.00708314	High across cell type family
ENSG00000021826	0	0	1	None
ENSG00000021852	0	0	1	None
ENSG00000022267	0.237866	0.489988	0.272146	High across location
ENSG00000022277	0.441668	0.35672	0.201612	Both to location and cell type
ENSG00000022355	0.948702	0.032756	0.018542	High across cell type family
ENSG00000022556	0.964115	0.00333318	0.0325515	High across cell type family
ENSG00000022567	0.822502	0.103277	0.074221	High across cell type family
ENSG00000022840	0.268552	0	0.731448	High across cell type family
ENSG00000022976	0.957105	0	0.0428952	High across cell type family
ENSG00000023041	0.207673	0.172916	0.619411	None
ENSG00000023171	0.123098	2.04403e-09	0.876902	None
ENSG00000023191	0.622834	0.0698883	0.307278	High across cell type family
ENSG00000023228	0.77281	0.00424381	0.222947	High across cell type family
ENSG00000023287	0.293219	0.06892	0.637861	High across cell type family
ENSG00000023318	0.807242	0	0.192758	High across cell type family
ENSG00000023330	0.888651	0.0537498	0.0575995	High across cell type family
ENSG00000023445	0.312942	0.0347337	0.652324	High across cell type family
ENSG00000023516	0.111743	0	0.888257	None
ENSG00000023572	0.937335	0.0496052	0.0130601	High across cell type family
ENSG00000023608	0.652521	0	0.347479	High across cell type family
ENSG00000023697	0.894009	0.0549895	0.0510013	High across cell type family
ENSG00000023734	0.942829	0.0181437	0.0390272	High across cell type family
ENSG00000023839	0.642134	0.158131	0.199735	High across cell type family
ENSG00000023892	1.01373e-10	0.882022	0.117978	High across location
ENSG00000023902	0	0.429431	0.570569	High across location
ENSG00000023909	0.919024	0	0.080976	High across cell type family
ENSG00000024048	0.528803	0.0859469	0.38525	High across cell type family
ENSG00000024422	0.920368	0	0.0796319	High across cell type family
ENSG00000024526	0.635367	0.313908	0.050725	Both to location and cell type
ENSG00000024862	0.921244	0	0.0787555	High across cell type family
ENSG00000025039	0.823075	0	0.176925	High across cell type family
ENSG00000025156	0.886357	0	0.113643	High across cell type family
ENSG00000025293	0.57079	0.203776	0.225434	High across cell type family
ENSG00000025423	0.974212	0	0.0257876	High across cell type family
ENSG00000025434	0.1212	0.15335	0.72545	None
ENSG00000025708	0.162701	0	0.837299	None
ENSG00000025770	0.888213	0.0752125	0.0365742	High across cell type family
ENSG00000025772	0.686653	0.163061	0.150286	High across cell type family
ENSG00000025796	0.228416	0.34087	0.430714	High across location
ENSG00000025800	0.809871	0.102421	0.0877079	High across cell type family
ENSG00000026025	0.770866	0	0.229134	High across cell type family
ENSG00000026036	0.501223	0.212984	0.285793	High across cell type family
ENSG00000026103	0.909057	0.0323825	0.0585605	High across cell type family
ENSG00000026297	0.621139	0.264806	0.114055	Both to location and cell type
ENSG00000026508	0.952383	0.0398863	0.00773061	High across cell type family
ENSG00000026559	0.354414	0	0.645586	High across cell type family
ENSG00000026652	0.811328	0	0.188672	High across cell type family
ENSG00000026751	0.576679	0.105287	0.318034	High across cell type family
ENSG00000026950	0.418033	0.0264956	0.555471	High across cell type family
ENSG00000027001	0.7207	0.0648926	0.214408	High across cell type family
ENSG00000027075	5.84862e-09	0.0269856	0.973014	None
ENSG00000027644	0.50264	0.0487817	0.448579	High across cell type family
ENSG00000027697	1.71437e-08	0.23039	0.76961	None
ENSG00000027847	0.536208	0	0.463792	High across cell type family
ENSG00000027869	0	0	1	None
ENSG00000028116	0.616776	0.0942577	0.288967	High across cell type family
ENSG00000028137	0.730832	0.0043593	0.264809	High across cell type family
ENSG00000028203	0.749972	0.19796	0.0520683	High across cell type family
ENSG00000028277	0.962988	0.00856788	0.0284444	High across cell type family
ENSG00000028310	0	0.167297	0.832703	None
ENSG00000028528	0.327516	0.144798	0.527686	High across cell type family
ENSG00000028839	0.946047	0.0333958	0.0205577	High across cell type family
ENSG00000029153	0.919378	0	0.0806219	High across cell type family
ENSG00000029363	0.900487	0	0.0995127	High across cell type family
ENSG00000029364	0.517285	0.435679	0.0470362	Both to location and cell type
ENSG00000029534	0.75819	0.0936423	0.148168	High across cell type family
ENSG00000029559	0.430271	0.0159745	0.553755	High across cell type family
ENSG00000029639	0	0	1	None
ENSG00000029725	0.707587	0.252029	0.0403835	Both to location and cell type
ENSG00000029993	0	0.173508	0.826492	None
ENSG00000030066	0.827833	2.54535e-11	0.172167	High across cell type family
ENSG00000030110	0.807109	0	0.192891	High across cell type family
ENSG00000030304	0.00276668	0.0241882	0.973045	None
ENSG00000030419	0.974621	0	0.0253793	High across cell type family
ENSG00000030582	0.706927	0.131268	0.161805	High across cell type family
ENSG00000031003	0.96768	0.000868175	0.0314518	High across cell type family
ENSG00000031081	0.961541	0	0.0384593	High across cell type family
ENSG00000031691	0.863932	0.0283865	0.107681	High across cell type family
ENSG00000031698	0.918842	0.0577378	0.0234205	High across cell type family
ENSG00000031823	0.90265	0	0.09735	High across cell type family
ENSG00000032219	0.803918	0.0544125	0.14167	High across cell type family
ENSG00000032389	0.827652	0.129131	0.0432176	High across cell type family
ENSG00000032444	0.654159	0.234411	0.11143	High across cell type family
ENSG00000032742	0.872225	0.0217922	0.105983	High across cell type family
ENSG00000033011	0.940041	0.0414446	0.018514	High across cell type family
ENSG00000033030	0.937954	0	0.0620462	High across cell type family
ENSG00000033050	0.0109145	0.174357	0.814729	None
ENSG00000033100	0.661511	0.159482	0.179006	High across cell type family
ENSG00000033122	0.766933	0.0597042	0.173363	High across cell type family
ENSG00000033170	0	0	1	None
ENSG00000033178	0	0.426171	0.573829	High across location
ENSG00000033327	0.8435	5.24471e-06	0.156494	High across cell type family
ENSG00000033627	0.895001	0.0373628	0.0676362	High across cell type family
ENSG00000033800	0.121738	0.449331	0.428931	High across location
ENSG00000033867	0.926977	0.0376047	0.0354182	High across cell type family
ENSG00000034053	0.405041	0	0.594959	High across cell type family
ENSG00000034152	0	0.371667	0.628333	High across location
ENSG00000034239	0.0227789	0.206332	0.770889	None
ENSG00000034510	0.958504	0.0393842	0.00211219	High across cell type family
ENSG00000034533	0	0	1	None
ENSG00000034677	0.928319	0	0.0716813	High across cell type family
ENSG00000034693	0.881349	0.0531721	0.0654785	High across cell type family
ENSG00000034713	0.548467	0.304059	0.147475	Both to location and cell type
ENSG00000034971	0	0	1	None
ENSG00000035115	0.109887	0.382271	0.507842	High across location
ENSG00000035141	0.60484	0.0444791	0.350681	High across cell type family
ENSG00000035403	0.379419	0.546526	0.0740542	Both to location and cell type
ENSG00000035499	0.919648	0.0248398	0.0555118	High across cell type family
ENSG00000035664	0.455904	0.128868	0.415228	High across cell type family
ENSG00000035681	0.159397	0.289667	0.550936	High across location
ENSG00000035687	0.945138	0.0449929	0.00986892	High across cell type family
ENSG00000035720	0.333271	0	0.666729	High across cell type family
ENSG00000035862	0.708952	0	0.291048	High across cell type family
ENSG00000035928	0.945384	0.023235	0.0313806	High across cell type family
ENSG00000036054	0.542372	0.118429	0.339198	High across cell type family
ENSG00000036257	0.834082	0.0969069	0.0690109	High across cell type family
ENSG00000036448	0.432721	0.165807	0.401472	High across cell type family
ENSG00000036473	0	0	1	None
ENSG00000036530	0.163651	0.678052	0.158297	High across location
ENSG00000036549	0.447371	0.401682	0.150947	Both to location and cell type
ENSG00000036565	5.56137e-09	0.0639898	0.93601	None
ENSG00000036672	0.451701	0	0.548299	High across cell type family
ENSG00000036828	0	0.265042	0.734958	High across location
ENSG00000037042	0.476601	0	0.523399	High across cell type family
ENSG00000037241	0.659923	0.154725	0.185352	High across cell type family
ENSG00000037280	0.425189	0.162677	0.412134	High across cell type family
ENSG00000037474	0.575202	0.0792176	0.34558	High across cell type family
ENSG00000037637	0	0	1	None
ENSG00000037749	0.0465642	0.821409	0.132027	High across location
ENSG00000037757	0.452026	1.95424e-08	0.547973	High across cell type family
ENSG00000037897	0.336067	0.363436	0.300498	Both to location and cell type
ENSG00000038002	0.878353	2.75568e-10	0.121647	High across cell type family
ENSG00000038210	0.915737	1.94892e-10	0.0842631	High across cell type family
ENSG00000038219	0.94478	0.00128678	0.0539328	High across cell type family
ENSG00000038274	0.770384	0	0.229616	High across cell type family
ENSG00000038295	0.939552	0.0433832	0.0170645	High across cell type family
ENSG00000038358	0.423083	0.193872	0.383045	High across cell type family
ENSG00000038382	0.0420008	0	0.957999	None
ENSG00000038427	0.833068	0.00067349	0.166258	High across cell type family
ENSG00000038532	0.884894	0	0.115106	High across cell type family
ENSG00000038945	0.078116	0.211595	0.710289	None
ENSG00000039068	0.36861	0.119236	0.512154	High across cell type family
ENSG00000039123	0.909312	0	0.0906877	High across cell type family
ENSG00000039139	0.53638	4.0554e-10	0.46362	High across cell type family
ENSG00000039319	0.390579	0	0.609421	High across cell type family
ENSG00000039523	0.939076	0	0.0609237	High across cell type family
ENSG00000039537	0.0992132	0	0.900787	None
ENSG00000039560	0.407955	0.22138	0.370664	High across cell type family
ENSG00000039600	0.869521	0.0471099	0.0833691	High across cell type family
ENSG00000039650	0.859669	0	0.140331	High across cell type family
ENSG00000039987	0	0.411012	0.588988	High across location
ENSG00000040199	0.872079	0.0938594	0.0340618	High across cell type family
ENSG00000040275	0.260942	0	0.739058	High across cell type family
ENSG00000040341	0.895568	0	0.104432	High across cell type family
ENSG00000040487	0.0187438	0.112324	0.868932	None
ENSG00000040531	0.991637	0.00601569	0.00234762	High across cell type family
ENSG00000040608	0.736548	0.231698	0.0317545	High across cell type family
ENSG00000040633	0.183793	0	0.816207	None
ENSG00000040731	0.085841	0.10287	0.811289	None
ENSG00000040933	0.623115	0	0.376885	High across cell type family
ENSG00000041353	0.954785	0.029399	0.0158159	High across cell type family
ENSG00000041357	0.745553	0.0991479	0.155299	High across cell type family
ENSG00000041515	0	0	1	None
ENSG00000041802	0.757408	0.0260862	0.216506	High across cell type family
ENSG00000041880	0.872834	0.0432739	0.0838926	High across cell type family
ENSG00000041982	0.968334	0.0113616	0.020304	High across cell type family
ENSG00000041988	0.832705	0.011285	0.15601	High across cell type family
ENSG00000042062	0.699233	0	0.300767	High across cell type family
ENSG00000042088	0.954115	1.71441e-10	0.0458846	High across cell type family
ENSG00000042286	0	0.0663631	0.933637	None
ENSG00000042317	0.924672	0	0.0753276	High across cell type family
ENSG00000042429	0.762875	0.0758912	0.161234	High across cell type family
ENSG00000042445	0.717578	0	0.282422	High across cell type family
ENSG00000042493	0.9635	0	0.0365003	High across cell type family
ENSG00000042753	0.958368	0.0295218	0.0121098	High across cell type family
ENSG00000042781	0.866704	5.2869e-11	0.133296	High across cell type family
ENSG00000042813	0.885801	0.0985822	0.0156165	High across cell type family
ENSG00000042832	0	0.231607	0.768393	None
ENSG00000042980	0.936675	0	0.0633254	High across cell type family
ENSG00000043039	0.815494	0	0.184506	High across cell type family
ENSG00000043093	0.849674	0.0424529	0.107873	High across cell type family
ENSG00000043143	0.839679	0	0.160321	High across cell type family
ENSG00000043355	0	0	1	None
ENSG00000043462	0.475231	0.384103	0.140666	Both to location and cell type
ENSG00000043514	0.486	0.255278	0.258723	Both to location and cell type
ENSG00000043591	0.670693	0.00366695	0.32564	High across cell type family
ENSG00000044090	0.733042	0.185217	0.0817407	High across cell type family
ENSG00000044115	0.880069	0.0108192	0.109112	High across cell type family
ENSG00000044446	0.953521	0	0.0464792	High across cell type family
ENSG00000044459	0.464727	0	0.535273	High across cell type family
ENSG00000044524	0.872244	3.78887e-11	0.127756	High across cell type family
ENSG00000044574	0.113652	0.157396	0.728952	None
ENSG00000046604	0	0	1	None
ENSG00000046647	0.972003	0	0.0279974	High across cell type family
ENSG00000046651	0.950805	0.0488383	0.000356954	High across cell type family
ENSG00000046653	0.817599	0.0511754	0.131225	High across cell type family
ENSG00000046889	0.899542	0	0.100458	High across cell type family
ENSG00000047056	7.6514e-10	0.634455	0.365545	High across location
ENSG00000047188	0.942231	0.0149103	0.0428584	High across cell type family
ENSG00000047230	0.812693	0	0.187307	High across cell type family
ENSG00000047249	0.498434	0.454398	0.0471689	Both to location and cell type
ENSG00000047315	0	0	1	None
ENSG00000047346	0.553596	0.0718557	0.374548	High across cell type family
ENSG00000047365	0.816752	0.0506264	0.132622	High across cell type family
ENSG00000047410	0.71976	0.0453635	0.234876	High across cell type family
ENSG00000047457	0.928944	0	0.0710556	High across cell type family
ENSG00000047578	0.832995	0	0.167005	High across cell type family
ENSG00000047579	0	0.0721118	0.927888	None
ENSG00000047597	0.922567	0	0.0774332	High across cell type family
ENSG00000047617	0.797926	0	0.202074	High across cell type family
ENSG00000047621	0.618248	0.275538	0.106214	Both to location and cell type
ENSG00000047634	0	8.7774e-08	1	None
ENSG00000047644	0.643605	0	0.356395	High across cell type family
ENSG00000047648	0.0586745	0	0.941326	None
ENSG00000047662	0.528026	0	0.471974	High across cell type family
ENSG00000047849	0.714784	0.137983	0.147234	High across cell type family
ENSG00000047932	0.655651	0.161011	0.183338	High across cell type family
ENSG00000047936	0	0	1	None
ENSG00000048028	4.52702e-10	0.142579	0.857421	None
ENSG00000048052	0.896401	0.0286241	0.0749747	High across cell type family
ENSG00000048140	0	0.239942	0.760058	None
ENSG00000048162	0.811412	0.00557719	0.18301	High across cell type family
ENSG00000048342	0.969668	0	0.0303318	High across cell type family
ENSG00000048392	0.353511	0.611002	0.0354864	Both to location and cell type
ENSG00000048405	0.939306	0	0.0606939	High across cell type family
ENSG00000048462	2.95673e-09	0.0997126	0.900287	None
ENSG00000048471	0.736159	0	0.263841	High across cell type family
ENSG00000048540	0.340906	0.117845	0.541249	High across cell type family
ENSG00000048544	0.340376	0.074171	0.585453	High across cell type family
ENSG00000048545	0.681322	0.0726784	0.246	High across cell type family
ENSG00000048649	0	0.528876	0.471124	High across location
ENSG00000048707	0.372008	0	0.627992	High across cell type family
ENSG00000048740	1.53319e-09	0.339048	0.660952	High across location
ENSG00000048828	0.22423	0.447258	0.328512	High across location
ENSG00000048991	0.655006	0.113238	0.231756	High across cell type family
ENSG00000049089	0.959653	0.0285033	0.0118441	High across cell type family
ENSG00000049130	0	0.205549	0.794451	None
ENSG00000049167	0.366195	0.606593	0.0272116	Both to location and cell type
ENSG00000049192	0.0570404	0	0.94296	None
ENSG00000049239	0.958229	4.95803e-11	0.0417707	High across cell type family
ENSG00000049245	0.786913	0	0.213087	High across cell type family
ENSG00000049246	0.943963	0.0156474	0.0403896	High across cell type family
ENSG00000049247	0	0.0422585	0.957742	None
ENSG00000049249	0	0	1	None
ENSG00000049283	0.647793	0.294184	0.0580232	Both to location and cell type
ENSG00000049323	0.587209	0	0.412791	High across cell type family
ENSG00000049449	0.731883	0.0860419	0.182075	High across cell type family
ENSG00000049540	0.809099	0.0374769	0.153424	High across cell type family
ENSG00000049541	0	0	1	None
ENSG00000049618	0.381577	0.501374	0.117048	Both to location and cell type
ENSG00000049656	0.835304	0.0726707	0.0920252	High across cell type family
ENSG00000049759	0	0.478924	0.521076	High across location
ENSG00000049768	0.755107	0.128901	0.115993	High across cell type family
ENSG00000049769	0.972703	0.0264943	0.000803111	High across cell type family
ENSG00000049860	0.889818	0.00711141	0.10307	High across cell type family
ENSG00000049883	0.937295	0	0.0627046	High across cell type family
ENSG00000050030	0.832766	0.100595	0.0666393	High across cell type family
ENSG00000050130	0.491117	0.314458	0.194425	Both to location and cell type
ENSG00000050165	0.0957835	0	0.904217	None
ENSG00000050327	2.8133e-10	0.762658	0.237342	High across location
ENSG00000050344	0.859402	0.0162589	0.124339	High across cell type family
ENSG00000050393	2.44087e-15	0	1	None
ENSG00000050405	0	0.144027	0.855973	None
ENSG00000050426	0.965846	0	0.0341543	High across cell type family
ENSG00000050438	0.694939	0.0187328	0.286328	High across cell type family
ENSG00000050555	0.0167398	0.466054	0.517206	High across location
ENSG00000050628	0.761956	0.0961886	0.141855	High across cell type family
ENSG00000050730	0.90721	0.00187274	0.0909176	High across cell type family
ENSG00000050748	0.957607	0	0.0423935	High across cell type family
ENSG00000050767	0.39971	0	0.60029	High across cell type family
ENSG00000050820	0	0	1	None
ENSG00000051009	0.877166	0.0604524	0.062382	High across cell type family
ENSG00000051108	0.592225	0.0683332	0.339442	High across cell type family
ENSG00000051128	0.958038	0	0.0419617	High across cell type family
ENSG00000051180	0	0.387572	0.612428	High across location
ENSG00000051341	0.902224	1.81054e-10	0.0977756	High across cell type family
ENSG00000051382	0.808563	0.176201	0.0152362	High across cell type family
ENSG00000051523	0.548046	0.205766	0.246189	High across cell type family
ENSG00000051596	0.598335	2.33925e-15	0.401665	High across cell type family
ENSG00000051620	0	0.375477	0.624523	High across location
ENSG00000051825	0.452153	0.166184	0.381663	High across cell type family
ENSG00000052126	0	0.300469	0.699531	High across location
ENSG00000052344	0.131102	0	0.868898	None
ENSG00000052723	0.432032	0.0192545	0.548714	High across cell type family
ENSG00000052749	0.170478	0	0.829522	None
ENSG00000052795	0.721614	0.0602977	0.218088	High across cell type family
ENSG00000052802	0	0	1	None
ENSG00000052841	0.872364	0.0251668	0.102469	High across cell type family
ENSG00000052850	0	0	1	None
ENSG00000053108	0.8201	0.118952	0.0609477	High across cell type family
ENSG00000053254	0.607238	0	0.392762	High across cell type family
ENSG00000053328	0.172393	0	0.827607	None
ENSG00000053371	0.907064	0.0738556	0.0190806	High across cell type family
ENSG00000053372	9.37774e-10	0.434234	0.565766	High across location
ENSG00000053438	0.819014	0	0.180986	High across cell type family
ENSG00000053501	1.15793e-10	0.747983	0.252017	High across location
ENSG00000053524	0.851453	0.0185044	0.130043	High across cell type family
ENSG00000053702	0.529687	0	0.470313	High across cell type family
ENSG00000053747	6.43279e-09	0.413856	0.586144	High across location
ENSG00000053770	0.877525	0.0252031	0.0972717	High across cell type family
ENSG00000053900	0.684571	0.216868	0.0985607	High across cell type family
ENSG00000053918	0.933132	0	0.0668676	High across cell type family
ENSG00000054116	0.101219	0.195636	0.703145	None
ENSG00000054118	0.118646	0.205673	0.67568	None
ENSG00000054148	0	0.457766	0.542234	High across location
ENSG00000054179	0.972039	0	0.0279606	High across cell type family
ENSG00000054219	0.576679	0.105287	0.318034	High across cell type family
ENSG00000054267	0.651906	0.27258	0.0755146	Both to location and cell type
ENSG00000054277	0.350156	1.5831e-08	0.649844	High across cell type family
ENSG00000054282	0.823331	0.138279	0.0383906	High across cell type family
ENSG00000054356	0.957719	0.00308126	0.0391995	High across cell type family
ENSG00000054392	0.698363	0.0450688	0.256568	High across cell type family
ENSG00000054523	0.944352	0	0.0556477	High across cell type family
ENSG00000054598	0.200784	0	0.799216	None
ENSG00000054611	0.832795	0.118351	0.0488543	High across cell type family
ENSG00000054654	0	4.02946e-18	1	None
ENSG00000054690	0.767092	0	0.232908	High across cell type family
ENSG00000054793	0.204345	0	0.795655	None
ENSG00000054796	0.636849	0.10464	0.258511	High across cell type family
ENSG00000054803	0.90663	0.0791463	0.0142232	High across cell type family
ENSG00000054938	0	0	1	None
ENSG00000054965	0.126638	0.342272	0.531091	High across location
ENSG00000054967	0.391555	0.0948653	0.513579	High across cell type family
ENSG00000054983	0.924846	0	0.0751539	High across cell type family
ENSG00000055044	0.906433	0.0536026	0.0399639	High across cell type family
ENSG00000055070	0.822906	0.133766	0.0433273	High across cell type family
ENSG00000055118	0.821542	0.136513	0.0419447	High across cell type family
ENSG00000055130	0.61272	0.374034	0.0132463	Both to location and cell type
ENSG00000055147	0.207394	0	0.792606	None
ENSG00000055163	0	0.442042	0.557958	High across location
ENSG00000055208	0.976777	0.00729614	0.015927	High across cell type family
ENSG00000055211	0.679813	0.058433	0.261754	High across cell type family
ENSG00000055332	0.335911	0	0.664089	High across cell type family
ENSG00000055483	0.823546	0	0.176454	High across cell type family
ENSG00000055609	0.989667	1.32173e-11	0.0103328	High across cell type family
ENSG00000055732	0.390193	0.232471	0.377337	High across cell type family
ENSG00000055813	0	0.0733309	0.926669	None
ENSG00000055917	0.0342672	0.92441	0.0413233	High across location
ENSG00000055950	1.36546e-10	0.565269	0.434731	High across location
ENSG00000055955	0.7264	0	0.2736	High across cell type family
ENSG00000055957	0.946099	0.00867774	0.0452235	High across cell type family
ENSG00000056050	0.827023	5.44379e-10	0.172977	High across cell type family
ENSG00000056097	0.37615	9.52756e-11	0.62385	High across cell type family
ENSG00000056277	0.250342	0.388495	0.361163	Both to location and cell type
ENSG00000056291	0.619549	0	0.380451	High across cell type family
ENSG00000056487	0.988018	0.0020656	0.00991656	High across cell type family
ENSG00000056558	0.935062	0	0.0649378	High across cell type family
ENSG00000056586	0	0	1	None
ENSG00000056736	0.956279	0	0.0437215	High across cell type family
ENSG00000056972	0.951416	0	0.0485843	High across cell type family
ENSG00000056998	0.872778	0	0.127222	High across cell type family
ENSG00000057019	0	0	1	None
ENSG00000057149	0	0	1	None
ENSG00000057252	0.00616909	0.18378	0.810051	None
ENSG00000057294	0.0177269	0.57901	0.403263	High across location
ENSG00000057468	0.791028	0.0114345	0.197537	High across cell type family
ENSG00000057593	0.209753	9.91495e-09	0.790247	None
ENSG00000057608	0.373998	0	0.626002	High across cell type family
ENSG00000057657	0.429532	0	0.570468	High across cell type family
ENSG00000057663	0.854704	0	0.145296	High across cell type family
ENSG00000057704	0.159194	0.283442	0.557364	High across location
ENSG00000057757	0.952894	0	0.0471061	High across cell type family
ENSG00000057935	0	0.411294	0.588706	High across location
ENSG00000058056	0.515368	0.0408418	0.44379	High across cell type family
ENSG00000058063	0.670486	0.00708056	0.322434	High across cell type family
ENSG00000058085	0.669256	0.168885	0.161859	High across cell type family
ENSG00000058091	0.789381	0.0460322	0.164586	High across cell type family
ENSG00000058262	0.376528	0	0.623472	High across cell type family
ENSG00000058272	0.311712	0.48916	0.199127	Both to location and cell type
ENSG00000058335	0.942884	0.0205251	0.0365907	High across cell type family
ENSG00000058404	0.799486	0	0.200514	High across cell type family
ENSG00000058453	0.229697	0.0742566	0.696046	None
ENSG00000058600	0.838822	0	0.161178	High across cell type family
ENSG00000058668	0.729184	0.00326259	0.267554	High across cell type family
ENSG00000058673	0.872498	0.0985023	0.0289994	High across cell type family
ENSG00000058729	0.63662	0.144587	0.218794	High across cell type family
ENSG00000058799	0.760808	0.222037	0.0171551	High across cell type family
ENSG00000058804	0.292864	0.0555375	0.651599	High across cell type family
ENSG00000058866	0.657655	0.0785719	0.263773	High across cell type family
ENSG00000059122	0.939095	0	0.0609049	High across cell type family
ENSG00000059145	0.51048	0.304309	0.185211	Both to location and cell type
ENSG00000059377	0.906439	0.0417097	0.0518511	High across cell type family
ENSG00000059378	0.733074	0	0.266926	High across cell type family
ENSG00000059573	0.911083	0.00120475	0.0877127	High across cell type family
ENSG00000059588	0.941107	0.0263285	0.0325641	High across cell type family
ENSG00000059691	0.328923	0	0.671077	High across cell type family
ENSG00000059728	0	0	1	None
ENSG00000059758	0.297454	0	0.702546	High across cell type family
ENSG00000059769	0.604449	0.328296	0.0672552	Both to location and cell type
ENSG00000059804	0.979649	0.00197131	0.0183798	High across cell type family
ENSG00000059915	0.721794	0.0721407	0.206066	High across cell type family
ENSG00000060069	0.772777	0.200857	0.0263655	High across cell type family
ENSG00000060138	0.96221	0.0182717	0.0195183	High across cell type family
ENSG00000060140	0.911568	0.0756431	0.0127886	High across cell type family
ENSG00000060237	0.783789	0.166218	0.0499931	High across cell type family
ENSG00000060339	0.60615	0.0798395	0.31401	High across cell type family
ENSG00000060491	4.39774e-05	0.100564	0.899392	None
ENSG00000060558	0.776865	0.00147937	0.221655	High across cell type family
ENSG00000060566	0.904156	0.0192833	0.0765612	High across cell type family
ENSG00000060642	0.957213	0	0.0427867	High across cell type family
ENSG00000060656	0.855412	0.118651	0.0259365	High across cell type family
ENSG00000060688	0.730266	0	0.269734	High across cell type family
ENSG00000060709	0.510504	0	0.489496	High across cell type family
ENSG00000060718	0.343037	0.281355	0.375608	Both to location and cell type
ENSG00000060749	2.36828e-09	0.685592	0.314408	High across location
ENSG00000060762	0.837315	0	0.162685	High across cell type family
ENSG00000060971	0.904365	3.24236e-10	0.0956351	High across cell type family
ENSG00000060982	0.964839	0.0170748	0.0180862	High across cell type family
ENSG00000061273	0.842391	0.0437422	0.113867	High across cell type family
ENSG00000061337	0.7476	0.174887	0.0775125	High across cell type family
ENSG00000061455	0.888921	0.0882344	0.0228445	High across cell type family
ENSG00000061492	0.872153	2.06238e-11	0.127847	High across cell type family
ENSG00000061656	0.687233	0.0549204	0.257846	High across cell type family
ENSG00000061676	0.611994	0.23927	0.148737	High across cell type family
ENSG00000061794	0.943942	2.08657e-10	0.0560577	High across cell type family
ENSG00000061918	0.867399	0	0.132601	High across cell type family
ENSG00000061936	0.891307	0	0.108693	High across cell type family
ENSG00000061938	0.855082	1.27988e-10	0.144918	High across cell type family
ENSG00000061987	0.62629	0.219736	0.153973	High across cell type family
ENSG00000062038	0.877804	0	0.122196	High across cell type family
ENSG00000062096	0.921895	0	0.0781048	High across cell type family
ENSG00000062194	0.873908	0.0962992	0.0297928	High across cell type family
ENSG00000062282	0.706118	0	0.293882	High across cell type family
ENSG00000062370	0.665874	0.170328	0.163798	High across cell type family
ENSG00000062485	0.647373	0.0927063	0.25992	High across cell type family
ENSG00000062524	0	0	1	None
ENSG00000062582	0.829314	0	0.170686	High across cell type family
ENSG00000062598	0.822602	3.45924e-16	0.177398	High across cell type family
ENSG00000062650	0.619719	0.176036	0.204244	High across cell type family
ENSG00000062716	0.885638	0.00882867	0.105534	High across cell type family
ENSG00000062725	0	0	1	None
ENSG00000062822	0.685075	0.0102523	0.304672	High across cell type family
ENSG00000063015	0.71621	0	0.28379	High across cell type family
ENSG00000063046	0.607874	0	0.392126	High across cell type family
ENSG00000063127	4.31056e-09	0.119567	0.880433	None
ENSG00000063169	0.0452608	0.172223	0.782516	None
ENSG00000063176	0.259911	0.517752	0.222337	Both to location and cell type
ENSG00000063177	0.596843	0.337184	0.0659731	Both to location and cell type
ENSG00000063180	0.814583	0.0297	0.155717	High across cell type family
ENSG00000063241	0.123537	0.327318	0.549145	High across location
ENSG00000063244	0.939669	0.0137985	0.0465326	High across cell type family
ENSG00000063245	0.826419	0.0568719	0.116709	High across cell type family
ENSG00000063322	0.219763	0.213854	0.566383	None
ENSG00000063438	0.371498	0	0.628502	High across cell type family
ENSG00000063587	0.962454	0	0.037546	High across cell type family
ENSG00000063601	0.751774	0.115577	0.132649	High across cell type family
ENSG00000063660	0	0.740662	0.259338	High across location
ENSG00000063761	0.347803	0.177086	0.475111	High across cell type family
ENSG00000063854	0.964291	0.0208621	0.0148472	High across cell type family
ENSG00000063978	0	1.28244e-10	1	None
ENSG00000064012	0	0	1	None
ENSG00000064042	0	0	1	None
ENSG00000064102	0.797179	0	0.202821	High across cell type family
ENSG00000064115	0.121656	0.0302405	0.848103	None
ENSG00000064195	0	0	1	None
ENSG00000064199	0.460085	0.525883	0.0140319	Both to location and cell type
ENSG00000064201	0.846927	0	0.153073	High across cell type family
ENSG00000064205	0.309706	0.469508	0.220786	Both to location and cell type
ENSG00000064218	0	0.929848	0.0701525	High across location
ENSG00000064225	4.66997e-08	0.322868	0.677132	High across location
ENSG00000064270	7.1057e-10	0.622908	0.377092	High across location
ENSG00000064300	0	0.631115	0.368885	High across location
ENSG00000064309	0.886879	0	0.113121	High across cell type family
ENSG00000064313	0.719808	1.17255e-09	0.280192	High across cell type family
ENSG00000064393	0.827069	0.0645363	0.108395	High across cell type family
ENSG00000064419	0	0.596396	0.403604	High across location
ENSG00000064489	0.560074	0.0300873	0.409839	High across cell type family
ENSG00000064490	0.975463	0	0.0245374	High across cell type family
ENSG00000064545	0.185729	0.373462	0.440809	High across location
ENSG00000064547	0.6984	0.187634	0.113966	High across cell type family
ENSG00000064601	0.680045	0.0391877	0.280767	High across cell type family
ENSG00000064607	0.0439537	0.132938	0.823108	None
ENSG00000064651	0.986244	0.000533365	0.0132223	High across cell type family
ENSG00000064652	0.464617	0.453528	0.0818551	Both to location and cell type
ENSG00000064655	0.901401	1.54017e-11	0.0985989	High across cell type family
ENSG00000064666	0.23629	0.115765	0.647944	None
ENSG00000064687	0.912608	1.08233e-11	0.0873921	High across cell type family
ENSG00000064692	0.282391	0	0.717609	High across cell type family
ENSG00000064703	0.805871	0	0.194129	High across cell type family
ENSG00000064726	0	0.362495	0.637505	High across location
ENSG00000064763	0.908425	0.0711794	0.0203955	High across cell type family
ENSG00000064787	0.923891	0.0682428	0.00786658	High across cell type family
ENSG00000064835	0.636849	0.10464	0.258511	High across cell type family
ENSG00000064886	0.898188	0.00769183	0.0941203	High across cell type family
ENSG00000064932	0.957417	0	0.0425831	High across cell type family
ENSG00000064933	0	0	1	None
ENSG00000064961	0.934137	0	0.0658631	High across cell type family
ENSG00000064989	0.407912	0	0.592088	High across cell type family
ENSG00000064995	0.289628	1.35694e-16	0.710372	High across cell type family
ENSG00000064999	5.57336e-10	0.365266	0.634734	High across location
ENSG00000065000	0.961891	0.0015045	0.0366047	High across cell type family
ENSG00000065029	0.805829	0	0.194171	High across cell type family
ENSG00000065054	0.784924	0	0.215076	High across cell type family
ENSG00000065057	0.420565	0.298408	0.281027	Both to location and cell type
ENSG00000065060	0.423109	0	0.576891	High across cell type family
ENSG00000065135	0.857264	0.0820469	0.0606889	High across cell type family
ENSG00000065150	8.20408e-10	0.105685	0.894315	None
ENSG00000065154	0.778149	0	0.221851	High across cell type family
ENSG00000065183	0.90153	0	0.0984702	High across cell type family
ENSG00000065243	0.939876	0	0.0601238	High across cell type family
ENSG00000065268	0	0.174155	0.825845	None
ENSG00000065308	0	0.384554	0.615446	High across location
ENSG00000065320	0.79927	0.0318922	0.168838	High across cell type family
ENSG00000065325	0	2.78623e-17	1	None
ENSG00000065328	0.715284	0	0.284716	High across cell type family
ENSG00000065357	0	0.275036	0.724964	High across location
ENSG00000065361	0.362334	0.367836	0.26983	Both to location and cell type
ENSG00000065371	0	0.124881	0.875119	None
ENSG00000065413	0.113633	0	0.886367	None
ENSG00000065427	0.102083	0.518028	0.379889	High across location
ENSG00000065457	0	0.779304	0.220696	High across location
ENSG00000065485	0	0	1	None
ENSG00000065491	0.842608	0.0292939	0.128098	High across cell type family
ENSG00000065518	0	0	1	None
ENSG00000065526	0.973529	0	0.0264714	High across cell type family
ENSG00000065534	0.848721	0	0.151279	High across cell type family
ENSG00000065548	0.875965	0	0.124035	High across cell type family
ENSG00000065559	0.947118	0	0.0528822	High across cell type family
ENSG00000065600	0.678318	0	0.321682	High across cell type family
ENSG00000065609	0.9768	9.81666e-12	0.0232001	High across cell type family
ENSG00000065613	0.745586	0.136952	0.117461	High across cell type family
ENSG00000065615	0.149557	0	0.850443	None
ENSG00000065618	0	0	1	None
ENSG00000065621	0.0870606	0.518525	0.394414	High across location
ENSG00000065665	0.82186	0.0900305	0.0881093	High across cell type family
ENSG00000065675	0.734686	0.261275	0.00403932	Both to location and cell type
ENSG00000065717	0.686911	0.26749	0.0455991	Both to location and cell type
ENSG00000065802	0.871989	0.0525643	0.0754463	High across cell type family
ENSG00000065809	0.358613	0.242113	0.399274	High across cell type family
ENSG00000065833	1.04533e-10	0.367295	0.632705	High across location
ENSG00000065882	0.637206	0	0.362794	High across cell type family
ENSG00000065883	0.570877	0.303488	0.125635	Both to location and cell type
ENSG00000065911	0.535337	0.273128	0.191535	Both to location and cell type
ENSG00000065923	0.958222	5.68249e-11	0.0417785	High across cell type family
ENSG00000065970	0.809179	0.0159861	0.174835	High across cell type family
ENSG00000065978	0.0457775	0.694725	0.259497	High across location
ENSG00000065989	0.955054	0.00923617	0.0357103	High across cell type family
ENSG00000066027	0.941722	0	0.0582782	High across cell type family
ENSG00000066032	0.29917	0.502856	0.197974	Both to location and cell type
ENSG00000066044	0.547837	0	0.452163	High across cell type family
ENSG00000066056	0.31847	0	0.68153	High across cell type family
ENSG00000066084	0.0669078	0	0.933092	None
ENSG00000066117	0.829517	0.0211146	0.149368	High across cell type family
ENSG00000066135	0.0965456	0	0.903454	None
ENSG00000066136	0.936758	0.00326604	0.0599762	High across cell type family
ENSG00000066185	0.655201	2.62059e-17	0.344799	High across cell type family
ENSG00000066230	0.590842	0.0669723	0.342186	High across cell type family
ENSG00000066248	0.416914	0	0.583086	High across cell type family
ENSG00000066279	0.880136	0.0263552	0.0935083	High across cell type family
ENSG00000066294	0.381114	0.00538279	0.613504	High across cell type family
ENSG00000066322	0.967451	0.0130018	0.0195468	High across cell type family
ENSG00000066336	0.943565	0.0294879	0.0269466	High across cell type family
ENSG00000066379	0.235765	0.326908	0.437327	High across location
ENSG00000066382	0.160701	0	0.839299	None
ENSG00000066405	0	0	1	None
ENSG00000066422	0.957158	0	0.0428416	High across cell type family
ENSG00000066427	0.812165	0	0.187835	High across cell type family
ENSG00000066455	0.270334	0	0.729666	High across cell type family
ENSG00000066468	0.873527	0	0.126473	High across cell type family
ENSG00000066557	0.247668	0.0178358	0.734496	None
ENSG00000066583	0.25838	0.159784	0.581836	High across cell type family
ENSG00000066629	0.220664	0.450751	0.328585	High across location
ENSG00000066651	0.981799	0	0.018201	High across cell type family
ENSG00000066654	0.524385	0	0.475615	High across cell type family
ENSG00000066697	0.943548	0	0.0564521	High across cell type family
ENSG00000066735	0.114569	0	0.885431	None
ENSG00000066739	0.900651	0.0242915	0.0750577	High across cell type family
ENSG00000066777	0.741104	0.088879	0.170017	High across cell type family
ENSG00000066813	0.561669	0.301753	0.136578	Both to location and cell type
ENSG00000066827	0	0.139022	0.860978	None
ENSG00000066855	5.50479e-10	0	1	None
ENSG00000066923	0	0	1	None
ENSG00000066926	0.817345	0	0.182655	High across cell type family
ENSG00000066933	5.80303e-11	0.725723	0.274277	High across location
ENSG00000067048	0.633019	0	0.366981	High across cell type family
ENSG00000067057	0.959015	0	0.0409847	High across cell type family
ENSG00000067064	0	0.273962	0.726038	High across location
ENSG00000067066	0.907942	0.00251808	0.0895397	High across cell type family
ENSG00000067082	0.339616	0	0.660384	High across cell type family
ENSG00000067113	0.791753	0.0691895	0.139058	High across cell type family
ENSG00000067141	0.974311	0.0164318	0.00925713	High across cell type family
ENSG00000067167	0.0644153	0.736086	0.199499	High across location
ENSG00000067177	0.907214	0.0199816	0.0728047	High across cell type family
ENSG00000067182	0.881276	0.0218194	0.0969045	High across cell type family
ENSG00000067191	0.801854	0.0594116	0.138735	High across cell type family
ENSG00000067208	0	0.460615	0.539385	High across location
ENSG00000067221	0.693427	0.0502646	0.256308	High across cell type family
ENSG00000067225	0.133653	0.139537	0.72681	None
ENSG00000067248	0.92377	0.0686688	0.00756158	High across cell type family
ENSG00000067334	0.856379	0.0373124	0.106309	High across cell type family
ENSG00000067365	0	0	1	None
ENSG00000067369	0.800821	0.120903	0.0782759	High across cell type family
ENSG00000067445	0.865358	0	0.134642	High across cell type family
ENSG00000067533	0.953422	0.0121447	0.0344332	High across cell type family
ENSG00000067560	0.520618	0.336805	0.142578	Both to location and cell type
ENSG00000067596	0.918902	9.18288e-17	0.0810976	High across cell type family
ENSG00000067606	0.986202	0.00686756	0.00693033	High across cell type family
ENSG00000067646	0.203844	0.634106	0.16205	High across location
ENSG00000067704	0.62664	0.145907	0.227453	High across cell type family
ENSG00000067715	0.960784	0.00693986	0.0322761	High across cell type family
ENSG00000067798	0.257686	0.439866	0.302448	Both to location and cell type
ENSG00000067829	0.638854	0.216701	0.144445	High across cell type family
ENSG00000067836	0.868344	0	0.131656	High across cell type family
ENSG00000067840	0.136677	0	0.863323	None
ENSG00000067842	0.948054	0.0126065	0.03934	High across cell type family
ENSG00000067900	0.905367	0	0.0946327	High across cell type family
ENSG00000067955	0.720276	0	0.279724	High across cell type family
ENSG00000067992	0.724561	0.0553929	0.220046	High across cell type family
ENSG00000068001	0.542	0.00181075	0.45619	High across cell type family
ENSG00000068024	0.66573	0.0189371	0.315333	High across cell type family
ENSG00000068028	0.0471879	0	0.952812	None
ENSG00000068078	0.987682	0	0.0123184	High across cell type family
ENSG00000068079	0.993145	2.52212e-11	0.00685514	High across cell type family
ENSG00000068097	4.81635e-09	0.065749	0.934251	None
ENSG00000068120	0.716554	0	0.283446	High across cell type family
ENSG00000068137	0.759481	0	0.240519	High across cell type family
ENSG00000068305	0	0.407428	0.592572	High across location
ENSG00000068308	0.926868	0.0104789	0.0626534	High across cell type family
ENSG00000068323	0.924667	1.32054e-10	0.075333	High across cell type family
ENSG00000068354	0.817241	0.0545266	0.128233	High across cell type family
ENSG00000068366	0.940381	0.0284902	0.0311287	High across cell type family
ENSG00000068383	0.245068	0.101478	0.653454	None
ENSG00000068394	0.692575	0.130551	0.176874	High across cell type family
ENSG00000068400	0.0377064	0	0.962294	None
ENSG00000068438	0.702214	0.209818	0.0879683	High across cell type family
ENSG00000068489	0.72775	0	0.27225	High across cell type family
ENSG00000068615	0.936047	0.0214364	0.0425162	High across cell type family
ENSG00000068650	0.0298367	0.387458	0.582706	High across location
ENSG00000068654	0.0309475	1.02464e-07	0.969052	None
ENSG00000068697	0.891911	1.32161e-11	0.108089	High across cell type family
ENSG00000068724	0.975542	0.0207375	0.00372022	High across cell type family
ENSG00000068745	0	1.84735e-17	1	None
ENSG00000068781	0.769131	0	0.230869	High across cell type family
ENSG00000068784	0.882921	0.0689419	0.048137	High across cell type family
ENSG00000068796	0.749705	0.0969628	0.153332	High across cell type family
ENSG00000068831	0.1307	0	0.8693	None
ENSG00000068878	0.896153	0	0.103847	High across cell type family
ENSG00000068885	0.48852	0.0739414	0.437539	High across cell type family
ENSG00000068903	0	0.0508737	0.949126	None
ENSG00000068912	0.381795	0.0575164	0.560689	High across cell type family
ENSG00000068971	0.194564	0.394295	0.411141	High across location
ENSG00000068976	0.912972	0	0.0870279	High across cell type family
ENSG00000069011	0	0	1	None
ENSG00000069018	0.700176	0	0.299824	High across cell type family
ENSG00000069020	0.643206	0.277929	0.0788647	Both to location and cell type
ENSG00000069122	0.265859	0.632853	0.101288	Both to location and cell type
ENSG00000069188	0.612357	0.306297	0.0813464	Both to location and cell type
ENSG00000069206	0.965014	0.0333578	0.00162793	High across cell type family
ENSG00000069248	0.640779	0.139727	0.219494	High across cell type family
ENSG00000069275	0	0.193229	0.806771	None
ENSG00000069329	0.875739	0	0.124261	High across cell type family
ENSG00000069345	0.796832	0.102396	0.100772	High across cell type family
ENSG00000069399	0.631883	0.209014	0.159102	High across cell type family
ENSG00000069424	0.965863	0.024896	0.00924081	High across cell type family
ENSG00000069431	0.90352	0.0131262	0.0833537	High across cell type family
ENSG00000069482	0.621732	0.26632	0.111948	Both to location and cell type
ENSG00000069493	0.940797	0.0292157	0.0299875	High across cell type family
ENSG00000069509	0.521924	0	0.478076	High across cell type family
ENSG00000069535	0.778721	0.173915	0.0473637	High across cell type family
ENSG00000069667	0.587952	0	0.412048	High across cell type family
ENSG00000069696	0.973677	1.11086e-17	0.0263233	High across cell type family
ENSG00000069702	0.930868	0.00518073	0.0639516	High across cell type family
ENSG00000069764	0.480633	0.453687	0.0656798	Both to location and cell type
ENSG00000069812	0.423062	0.268749	0.308189	Both to location and cell type
ENSG00000069849	0.913942	0	0.086058	High across cell type family
ENSG00000069869	0.885566	0	0.114434	High across cell type family
ENSG00000069943	0.59984	0.32403	0.0761296	Both to location and cell type
ENSG00000069956	0.345049	5.04305e-19	0.654951	High across cell type family
ENSG00000069966	0.985651	5.86624e-11	0.0143489	High across cell type family
ENSG00000069974	0.10929	0.0915635	0.799146	None
ENSG00000069998	0	0.786749	0.213251	High across location
ENSG00000070010	0.808471	0.147812	0.0437172	High across cell type family
ENSG00000070018	0.966623	0	0.0333775	High across cell type family
ENSG00000070019	0.85227	0	0.14773	High across cell type family
ENSG00000070031	0.147697	0	0.852303	None
ENSG00000070047	0.957132	0.000501132	0.0423669	High across cell type family
ENSG00000070061	0.606815	0.305928	0.0872571	Both to location and cell type
ENSG00000070081	0.672741	0	0.327259	High across cell type family
ENSG00000070087	0.683853	0	0.316147	High across cell type family
ENSG00000070159	0.338925	0.0941512	0.566924	High across cell type family
ENSG00000070182	0.951864	0.021633	0.0265034	High across cell type family
ENSG00000070190	0	0.476438	0.523562	High across location
ENSG00000070193	0	0	1	None
ENSG00000070214	0.740777	0	0.259223	High across cell type family
ENSG00000070269	0.900362	0.00770605	0.0919315	High across cell type family
ENSG00000070366	0.684764	7.50626e-16	0.315236	High across cell type family
ENSG00000070367	0.360079	0.355993	0.283927	Both to location and cell type
ENSG00000070371	0.0649711	0.363082	0.571947	High across location
ENSG00000070388	0.34542	0.526894	0.127687	Both to location and cell type
ENSG00000070404	0.957618	0.0119611	0.0304214	High across cell type family
ENSG00000070413	0	0.641894	0.358106	High across location
ENSG00000070423	0.500309	0	0.499691	High across cell type family
ENSG00000070444	0.802925	0	0.197075	High across cell type family
ENSG00000070476	0.968293	3.46809e-11	0.0317069	High across cell type family
ENSG00000070495	0.632932	0.227063	0.140005	High across cell type family
ENSG00000070501	0.427767	0.0330829	0.53915	High across cell type family
ENSG00000070526	0.0827273	0.642517	0.274756	High across location
ENSG00000070540	0.359295	6.12779e-16	0.640705	High across cell type family
ENSG00000070601	0.260353	0.0453615	0.694285	High across cell type family
ENSG00000070610	0.787642	2.96858e-09	0.212358	High across cell type family
ENSG00000070614	0.849959	0	0.150041	High across cell type family
ENSG00000070669	0.958613	0	0.0413869	High across cell type family
ENSG00000070718	0.866364	3.55852e-11	0.133636	High across cell type family
ENSG00000070729	0.883291	1.78143e-21	0.116709	High across cell type family
ENSG00000070731	0.897621	0	0.102379	High across cell type family
ENSG00000070748	2.82263e-09	0.100032	0.899968	None
ENSG00000070756	0.296026	0	0.703974	High across cell type family
ENSG00000070759	0.923384	0	0.0766155	High across cell type family
ENSG00000070761	0.305106	1.42732e-17	0.694894	High across cell type family
ENSG00000070770	0.0647266	0	0.935273	None
ENSG00000070778	0.882702	0	0.117298	High across cell type family
ENSG00000070785	0.260218	1.30388e-06	0.739781	High across cell type family
ENSG00000070808	0.57856	0.265721	0.15572	Both to location and cell type
ENSG00000070814	0	0.160729	0.839271	None
ENSG00000070831	0.942665	0	0.0573347	High across cell type family
ENSG00000070882	0.321781	0.435412	0.242808	Both to location and cell type
ENSG00000070886	0.788694	0.114571	0.0967352	High across cell type family
ENSG00000070915	0.874099	1.51189e-09	0.125901	High across cell type family
ENSG00000070950	0.446504	0.077152	0.476344	High across cell type family
ENSG00000070961	0.794896	0.0670087	0.138095	High across cell type family
ENSG00000070985	0	0	1	None
ENSG00000071051	0	0	1	None
ENSG00000071054	0.83106	7.15329e-11	0.16894	High across cell type family
ENSG00000071073	0.868147	0.0450805	0.0867728	High across cell type family
ENSG00000071082	0.340845	0.402601	0.256554	Both to location and cell type
ENSG00000071127	0.705793	0	0.294207	High across cell type family
ENSG00000071189	3.09111e-09	0.946792	0.0532076	High across location
ENSG00000071203	6.26374e-11	0.815973	0.184027	High across location
ENSG00000071205	0	0	1	None
ENSG00000071242	0.946951	0.0180429	0.035006	High across cell type family
ENSG00000071243	0.551795	4.68075e-17	0.448205	High across cell type family
ENSG00000071246	0	0.0579079	0.942092	None
ENSG00000071282	0.809636	0	0.190364	High across cell type family
ENSG00000071462	0.639589	0.301187	0.0592242	Both to location and cell type
ENSG00000071537	0.112075	0.636627	0.251298	High across location
ENSG00000071539	0.301243	0.175845	0.522912	High across cell type family
ENSG00000071553	0.698963	0.18481	0.116227	High across cell type family
ENSG00000071564	0.957727	0.029283	0.0129896	High across cell type family
ENSG00000071575	0.607945	0	0.392055	High across cell type family
ENSG00000071626	0.936986	0	0.063014	High across cell type family
ENSG00000071655	0.938328	0.0312421	0.0304297	High across cell type family
ENSG00000071677	0.576679	0.105287	0.318034	High across cell type family
ENSG00000071794	0	0.654201	0.345799	High across location
ENSG00000071859	0.85021	0	0.14979	High across cell type family
ENSG00000071889	0.941502	0	0.0584978	High across cell type family
ENSG00000071894	0.818046	0	0.181954	High across cell type family
ENSG00000071909	0.176493	0.411124	0.412383	High across location
ENSG00000071967	0.763241	0	0.236759	High across cell type family
ENSG00000071991	0	0	1	None
ENSG00000071994	0.858974	0	0.141026	High across cell type family
ENSG00000072041	0.972688	0	0.0273124	High across cell type family
ENSG00000072042	0.929984	0	0.0700162	High across cell type family
ENSG00000072062	0.676002	0.183976	0.140022	High across cell type family
ENSG00000072071	0.46775	0.0397395	0.49251	High across cell type family
ENSG00000072080	0.0217595	0.121723	0.856517	None
ENSG00000072110	0.556486	0.045175	0.398339	High across cell type family
ENSG00000072121	0.83683	0	0.16317	High across cell type family
ENSG00000072133	0.981549	9.28429e-11	0.0184513	High across cell type family
ENSG00000072134	0.78791	0.144639	0.0674506	High across cell type family
ENSG00000072135	0	0.865035	0.134965	High across location
ENSG00000072163	0.0817102	7.1941e-17	0.91829	None
ENSG00000072182	0.0192087	0.523926	0.456865	High across location
ENSG00000072195	0.896731	0	0.103269	High across cell type family
ENSG00000072201	0.941954	0.0273148	0.0307312	High across cell type family
ENSG00000072210	0	6.95069e-17	1	None
ENSG00000072274	0.268189	0	0.731811	High across cell type family
ENSG00000072310	0.962176	0.0086601	0.0291643	High across cell type family
ENSG00000072315	0.947802	0	0.0521982	High across cell type family
ENSG00000072364	0.169996	0.239677	0.590327	None
ENSG00000072401	0.902916	8.91256e-11	0.0970842	High across cell type family
ENSG00000072415	0.501716	1.39747e-10	0.498284	High across cell type family
ENSG00000072422	0.689369	0.193509	0.117122	High across cell type family
ENSG00000072501	0.712206	0.205503	0.082291	High across cell type family
ENSG00000072506	0.00974493	0.627179	0.363076	High across location
ENSG00000072518	0.394868	2.20844e-10	0.605132	High across cell type family
ENSG00000072571	0	0	1	None
ENSG00000072609	8.93465e-10	0.443583	0.556417	High across location
ENSG00000072657	0.95971	0.00565121	0.0346385	High across cell type family
ENSG00000072682	0.43364	0	0.56636	High across cell type family
ENSG00000072694	0.675433	0	0.324567	High across cell type family
ENSG00000072736	0.946033	0	0.0539671	High across cell type family
ENSG00000072756	0.858545	0	0.141455	High across cell type family
ENSG00000072778	0.919611	2.84361e-10	0.0803893	High across cell type family
ENSG00000072786	0.536396	0	0.463604	High across cell type family
ENSG00000072803	0.0402262	0.269524	0.69025	High across location
ENSG00000072818	0	0.300393	0.699607	High across location
ENSG00000072832	0.785957	0.0703157	0.143728	High across cell type family
ENSG00000072840	0.907966	0	0.0920342	High across cell type family
ENSG00000072849	0.977553	0.00234445	0.020103	High across cell type family
ENSG00000072858	0.382759	0	0.617241	High across cell type family
ENSG00000072864	0.922155	3.9659e-09	0.0778452	High across cell type family
ENSG00000072952	0.759888	0.0168869	0.223225	High across cell type family
ENSG00000072954	0.101062	1.6174e-18	0.898938	None
ENSG00000072958	0.40363	0	0.59637	High across cell type family
ENSG00000073008	0.891083	0	0.108917	High across cell type family
ENSG00000073050	0.466521	0	0.533479	High across cell type family
ENSG00000073060	0.503833	0.0280456	0.468122	High across cell type family
ENSG00000073067	0.0352672	3.39213e-09	0.964733	None
ENSG00000073111	3.18459e-11	0.713838	0.286162	High across location
ENSG00000073146	0.800206	0.0138503	0.185944	High across cell type family
ENSG00000073150	0.64086	0.261209	0.0979313	Both to location and cell type
ENSG00000073169	0	0.308772	0.691228	High across location
ENSG00000073282	0.142366	0	0.857634	None
ENSG00000073331	0.624033	0.239299	0.136668	High across cell type family
ENSG00000073350	0.726437	0.0628563	0.210707	High across cell type family
ENSG00000073417	0.949258	0.00577461	0.0449678	High across cell type family
ENSG00000073464	0.964948	0.0170926	0.0179589	High across cell type family
ENSG00000073536	0.320383	0.108184	0.571433	High across cell type family
ENSG00000073578	0.671167	0	0.328833	High across cell type family
ENSG00000073584	3.74e-10	0.238606	0.761394	None
ENSG00000073598	0	0	1	None
ENSG00000073605	0.0262045	5.02496e-10	0.973795	None
ENSG00000073614	1.17316e-10	0.680479	0.319521	High across location
ENSG00000073670	0.933153	0.0246321	0.0422153	High across cell type family
ENSG00000073711	0.381419	0.234547	0.384034	High across cell type family
ENSG00000073712	0.967467	1.26145e-10	0.0325328	High across cell type family
ENSG00000073734	0.443738	0	0.556262	High across cell type family
ENSG00000073737	0	1.01103e-10	1	None
ENSG00000073754	0.212006	0	0.787994	None
ENSG00000073756	0.448808	0.253617	0.297575	Both to location and cell type
ENSG00000073792	0.186897	2.0224e-08	0.813103	None
ENSG00000073803	0.827992	0.066287	0.105721	High across cell type family
ENSG00000073849	0.297501	0	0.702499	High across cell type family
ENSG00000073861	0.196587	0	0.803413	None
ENSG00000073910	0.610179	0.03327	0.356551	High across cell type family
ENSG00000073921	0.793366	0.0584728	0.148161	High across cell type family
ENSG00000073969	0.983024	0.00398988	0.0129863	High across cell type family
ENSG00000074047	0.983281	0.00208921	0.0146301	High across cell type family
ENSG00000074054	0.904084	0.0762951	0.0196205	High across cell type family
ENSG00000074071	0.861964	0.0624661	0.0755704	High across cell type family
ENSG00000074181	0.945433	0.0101778	0.0443889	High across cell type family
ENSG00000074201	0.307	0.0631779	0.629822	High across cell type family
ENSG00000074211	0.581106	0.265235	0.15366	Both to location and cell type
ENSG00000074219	0.789264	0	0.210736	High across cell type family
ENSG00000074266	0.0772674	0.146374	0.776358	None
ENSG00000074276	0.250098	0.733065	0.0168364	Both to location and cell type
ENSG00000074317	0.980422	0.0059673	0.0136109	High across cell type family
ENSG00000074319	0.771084	0.127554	0.101362	High across cell type family
ENSG00000074356	0.826023	0	0.173977	High across cell type family
ENSG00000074370	0.355573	0.317954	0.326473	Both to location and cell type
ENSG00000074410	0.80675	0.0727627	0.120487	High across cell type family
ENSG00000074416	0	0	1	None
ENSG00000074527	0	0.0952423	0.904758	None
ENSG00000074582	0.351822	0.238984	0.409194	High across cell type family
ENSG00000074590	0.152172	0.10184	0.745988	None
ENSG00000074603	0.916013	0.00978757	0.0741998	High across cell type family
ENSG00000074621	0.797905	0.013092	0.189003	High across cell type family
ENSG00000074657	0.887044	0.0242361	0.0887197	High across cell type family
ENSG00000074660	0.307246	0.406857	0.285898	Both to location and cell type
ENSG00000074695	0.504062	0.111006	0.384932	High across cell type family
ENSG00000074696	0.134482	0.536607	0.328912	High across location
ENSG00000074706	0.895308	0.0437929	0.0608987	High across cell type family
ENSG00000074755	0.662546	0.00172119	0.335733	High across cell type family
ENSG00000074771	0	0	1	None
ENSG00000074800	0.844035	0.00446243	0.151503	High across cell type family
ENSG00000074803	0.822063	0.0968385	0.0810984	High across cell type family
ENSG00000074842	0.67601	0.103457	0.220533	High across cell type family
ENSG00000074855	0.986399	0.0029794	0.0106216	High across cell type family
ENSG00000074935	0.734418	0.0155535	0.250029	High across cell type family
ENSG00000074964	0.860886	2.73054e-16	0.139114	High across cell type family
ENSG00000074966	0.93567	0	0.0643304	High across cell type family
ENSG00000075035	0.892383	4.64434e-11	0.107617	High across cell type family
ENSG00000075043	0.82649	0.131255	0.042255	High across cell type family
ENSG00000075073	0	0	1	None
ENSG00000075089	0.904871	5.52428e-10	0.0951288	High across cell type family
ENSG00000075131	0.89371	0.0472392	0.0590504	High across cell type family
ENSG00000075142	0.847016	2.68548e-11	0.152984	High across cell type family
ENSG00000075151	0.891294	0.0998788	0.00882732	High across cell type family
ENSG00000075188	0.930383	0	0.0696171	High across cell type family
ENSG00000075213	0	0	1	None
ENSG00000075218	0	0.427113	0.572887	High across location
ENSG00000075223	0.816948	0.11497	0.0680818	High across cell type family
ENSG00000075234	0.832726	0.00186362	0.165411	High across cell type family
ENSG00000075239	0.890027	0.0820676	0.0279057	High across cell type family
ENSG00000075240	0.800092	0.0515465	0.148362	High across cell type family
ENSG00000075275	0	0	1	None
ENSG00000075290	0.214801	0	0.785199	None
ENSG00000075292	0.314499	0.235354	0.450147	High across cell type family
ENSG00000075303	0.275771	0.435492	0.288737	Both to location and cell type
ENSG00000075336	0.728067	0	0.271933	High across cell type family
ENSG00000075340	0.970205	0.0211937	0.00860084	High across cell type family
ENSG00000075391	0.921218	0.0430167	0.0357654	High across cell type family
ENSG00000075399	0.904854	2.08971e-10	0.0951465	High across cell type family
ENSG00000075407	0	0	1	None
ENSG00000075413	0.884698	1.27911e-10	0.115302	High across cell type family
ENSG00000075415	0.885139	0.0243741	0.0904871	High across cell type family
ENSG00000075420	0.944044	0.00105727	0.054899	High across cell type family
ENSG00000075426	0	2.76437e-16	1	None
ENSG00000075429	0.0277238	0	0.972276	None
ENSG00000075461	0.0898574	0	0.910143	None
ENSG00000075539	0	0	1	None
ENSG00000075568	0	0.527487	0.472513	High across location
ENSG00000075618	0.799722	0.0941413	0.106137	High across cell type family
ENSG00000075624	0	0.150898	0.849102	None
ENSG00000075643	0.303732	0	0.696268	High across cell type family
ENSG00000075651	0.657506	0.14962	0.192874	High across cell type family
ENSG00000075673	0	4.80124e-17	1	None
ENSG00000075702	0.230602	8.6512e-07	0.769397	None
ENSG00000075711	0	0.126729	0.873271	None
ENSG00000075785	0.72272	0	0.27728	High across cell type family
ENSG00000075790	0.0106309	0.0422343	0.947135	None
ENSG00000075826	0.907146	0.00209458	0.0907596	High across cell type family
ENSG00000075856	0	0	1	None
ENSG00000075884	3.20863e-19	0	1	None
ENSG00000075886	0.542309	0.0697187	0.387972	High across cell type family
ENSG00000075891	0	0	1	None
ENSG00000075914	0.561677	0.084399	0.353924	High across cell type family
ENSG00000075945	0.952195	0.0350365	0.0127681	High across cell type family
ENSG00000075975	0.818105	0	0.181895	High across cell type family
ENSG00000076003	1.04969e-17	0	1	None
ENSG00000076043	0.142035	0	0.857965	None
ENSG00000076053	0.00812359	0.897631	0.0942454	High across location
ENSG00000076067	0.977685	0.00151618	0.0207989	High across cell type family
ENSG00000076108	0.873376	4.09181e-11	0.126624	High across cell type family
ENSG00000076201	0.843175	0.0502379	0.106587	High across cell type family
ENSG00000076242	0.737419	2.11984e-08	0.262581	High across cell type family
ENSG00000076248	0.937463	0	0.0625372	High across cell type family
ENSG00000076258	0.99479	0.00153106	0.00367911	High across cell type family
ENSG00000076321	0	2.08515e-19	1	None
ENSG00000076344	0.311921	0.138863	0.549216	High across cell type family
ENSG00000076351	0.820197	7.57479e-08	0.179803	High across cell type family
ENSG00000076356	0.620165	0	0.379835	High across cell type family
ENSG00000076382	0.306854	0.458247	0.234899	Both to location and cell type
ENSG00000076513	0.841149	0.0313783	0.127473	High across cell type family
ENSG00000076554	0.958187	0.0253373	0.0164758	High across cell type family
ENSG00000076555	0.980496	2.86877e-10	0.0195035	High across cell type family
ENSG00000076604	0.984015	0	0.0159848	High across cell type family
ENSG00000076641	0	0.683329	0.316671	High across location
ENSG00000076650	0	0	1	None
ENSG00000076662	0.936573	0	0.0634271	High across cell type family
ENSG00000076685	0.989462	0.00130382	0.00923459	High across cell type family
ENSG00000076706	0.0663477	0.669935	0.263718	High across location
ENSG00000076716	0.828998	0.0198129	0.151189	High across cell type family
ENSG00000076770	0.82906	0	0.17094	High across cell type family
ENSG00000076826	0.880893	0.04887	0.0702367	High across cell type family
ENSG00000076864	0.871948	0.105151	0.0229017	High across cell type family
ENSG00000076924	0.746152	1.99003e-10	0.253848	High across cell type family
ENSG00000076928	0.996869	0	0.00313135	High across cell type family
ENSG00000076944	0.064237	0.344926	0.590837	High across location
ENSG00000076984	0.484437	0.140653	0.37491	High across cell type family
ENSG00000077009	0	0	1	None
ENSG00000077044	0.0760743	0.11886	0.805066	None
ENSG00000077063	0.781683	0	0.218317	High across cell type family
ENSG00000077080	0.988057	0	0.0119427	High across cell type family
ENSG00000077092	0	0.707344	0.292656	High across location
ENSG00000077097	0.226267	0.33069	0.443043	High across location
ENSG00000077147	0	0.620341	0.379659	High across location
ENSG00000077150	0.956023	0.0349072	0.00906994	High across cell type family
ENSG00000077152	0.976301	0.0126223	0.011077	High across cell type family
ENSG00000077157	0.520574	0.289269	0.190157	Both to location and cell type
ENSG00000077232	5.11402e-09	0.19005	0.80995	None
ENSG00000077235	0.429031	0.409246	0.161723	Both to location and cell type
ENSG00000077238	0.435557	0	0.564443	High across cell type family
ENSG00000077254	0.962198	0.00658445	0.0312178	High across cell type family
ENSG00000077264	0.952821	1.85805e-10	0.0471791	High across cell type family
ENSG00000077274	0	0.127786	0.872214	None
ENSG00000077279	0.973091	0	0.0269091	High across cell type family
ENSG00000077312	0.378458	0.0497787	0.571763	High across cell type family
ENSG00000077327	0	0	1	None
ENSG00000077348	0.912868	0	0.0871316	High across cell type family
ENSG00000077380	0.93017	0.0157243	0.0541059	High across cell type family
ENSG00000077420	0.786439	0.0640398	0.149521	High across cell type family
ENSG00000077454	0.933853	0.0474895	0.0186579	High across cell type family
ENSG00000077458	0.344772	0	0.655228	High across cell type family
ENSG00000077463	0.481556	0	0.518444	High across cell type family
ENSG00000077498	0.334259	0	0.665741	High across cell type family
ENSG00000077514	0.0294024	0.3859	0.584697	High across location
ENSG00000077522	0.0107055	0	0.989294	None
ENSG00000077549	0.753463	0	0.246537	High across cell type family
ENSG00000077585	0.961817	0.00263419	0.0355485	High across cell type family
ENSG00000077616	0.841086	0.0580546	0.100859	High across cell type family
ENSG00000077684	0.479427	0	0.520573	High across cell type family
ENSG00000077713	0.960255	0.00619832	0.0335464	High across cell type family
ENSG00000077721	0	0	1	None
ENSG00000077782	0.483597	0.016912	0.499491	High across cell type family
ENSG00000077800	0.084531	0.193261	0.722208	None
ENSG00000077935	0	0	1	None
ENSG00000077942	0.962176	0.00226063	0.035563	High across cell type family
ENSG00000077943	0.834321	0.158374	0.00730432	High across cell type family
ENSG00000077984	0.128223	0.064567	0.80721	None
ENSG00000078018	0.981972	0	0.0180284	High across cell type family
ENSG00000078043	0.81791	0.153273	0.0288167	High across cell type family
ENSG00000078053	0.984326	7.35891e-16	0.0156741	High across cell type family
ENSG00000078061	0.924439	0.00721026	0.0683509	High across cell type family
ENSG00000078070	0.655131	0	0.344869	High across cell type family
ENSG00000078081	0.888709	0.0434763	0.0678145	High across cell type family
ENSG00000078098	0.659711	1.26003e-16	0.340289	High across cell type family
ENSG00000078114	0.914225	0	0.0857755	High across cell type family
ENSG00000078124	0.051601	0	0.948399	None
ENSG00000078140	0.62593	0.221728	0.152342	High across cell type family
ENSG00000078142	0.0796154	0.700078	0.220306	High across location
ENSG00000078177	0	0	1	None
ENSG00000078237	0.940753	0	0.0592466	High across cell type family
ENSG00000078246	0.884111	0	0.115889	High across cell type family
ENSG00000078269	0.753354	3.30599e-10	0.246646	High across cell type family
ENSG00000078295	0.774832	0.0104388	0.214729	High across cell type family
ENSG00000078304	0	0.379678	0.620322	High across location
ENSG00000078328	0.973751	0.0195108	0.00673822	High across cell type family
ENSG00000078369	0.920601	0.0119365	0.0674629	High across cell type family
ENSG00000078401	0.167328	0.654255	0.178417	High across location
ENSG00000078403	0.00460286	0	0.995397	None
ENSG00000078487	0.839795	0.088406	0.0717993	High across cell type family
ENSG00000078549	0.937849	0.00128927	0.0608617	High across cell type family
ENSG00000078579	0.590419	0.0727107	0.33687	High across cell type family
ENSG00000078589	0.576679	0.105287	0.318034	High across cell type family
ENSG00000078596	0.426089	0.336638	0.237272	Both to location and cell type
ENSG00000078618	0	0.604957	0.395043	High across location
ENSG00000078668	0.685779	0	0.314221	High across cell type family
ENSG00000078674	0.757392	0.0556111	0.186997	High across cell type family
ENSG00000078687	0	0.0480109	0.951989	None
ENSG00000078699	0.788297	0.153504	0.0581981	High across cell type family
ENSG00000078725	8.682e-11	0.814263	0.185737	High across location
ENSG00000078747	0.634092	0.195482	0.170426	High across cell type family
ENSG00000078795	4.9528e-08	0.119049	0.880951	None
ENSG00000078804	0.570991	0.128616	0.300393	High across cell type family
ENSG00000078808	0.429147	0	0.570853	High across cell type family
ENSG00000078814	0.646957	0	0.353043	High across cell type family
ENSG00000078900	2.25556e-09	0.1018	0.8982	None
ENSG00000078902	0.723005	0	0.276995	High across cell type family
ENSG00000078967	0.460554	0.317599	0.221847	Both to location and cell type
ENSG00000079101	0.929087	0.00603404	0.0648789	High across cell type family
ENSG00000079102	0.206624	0.181996	0.61138	None
ENSG00000079112	0	0.0581993	0.941801	None
ENSG00000079134	0.851074	0.0270585	0.121867	High across cell type family
ENSG00000079150	0.738765	0.0783413	0.182893	High across cell type family
ENSG00000079156	0.248877	0	0.751123	None
ENSG00000079215	0.986845	0.00527164	0.00788314	High across cell type family
ENSG00000079246	0.390472	0	0.609528	High across cell type family
ENSG00000079257	0.937091	0.0129056	0.0500038	High across cell type family
ENSG00000079263	0.808639	0.0400438	0.151318	High across cell type family
ENSG00000079277	0.259302	0	0.740698	High across cell type family
ENSG00000079308	0.924341	0	0.0756594	High across cell type family
ENSG00000079313	0.049564	0	0.950436	None
ENSG00000079332	0.943279	0	0.0567213	High across cell type family
ENSG00000079335	0.90272	0.00507684	0.0922034	High across cell type family
ENSG00000079337	0.96379	0.0151507	0.0210592	High across cell type family
ENSG00000079385	1.20324e-10	0	1	None
ENSG00000079387	0.903402	0	0.0965978	High across cell type family
ENSG00000079393	0.118502	0	0.881498	None
ENSG00000079432	0.653374	0.116013	0.230613	High across cell type family
ENSG00000079435	0	0	1	None
ENSG00000079459	0.588361	0	0.411639	High across cell type family
ENSG00000079462	0.266198	0.398962	0.33484	Both to location and cell type
ENSG00000079482	0.934548	0.056101	0.00935079	High across cell type family
ENSG00000079557	0.647975	0	0.352025	High across cell type family
ENSG00000079616	0.641326	0.202521	0.156154	High across cell type family
ENSG00000079689	0.486617	0.103274	0.410109	High across cell type family
ENSG00000079691	0.950507	0.0403066	0.00918668	High across cell type family
ENSG00000079739	0.886553	0	0.113447	High across cell type family
ENSG00000079785	0.965036	1.65994e-10	0.0349636	High across cell type family
ENSG00000079805	1.78393e-09	0	1	None
ENSG00000079819	0.486719	0.17404	0.339241	High across cell type family
ENSG00000079841	0.971203	0	0.0287966	High across cell type family
ENSG00000079931	0.0766798	0.889606	0.033714	High across location
ENSG00000079950	0.854965	0	0.145035	High across cell type family
ENSG00000079974	5.22584e-10	0.220624	0.779376	None
ENSG00000079999	0.444889	0.427708	0.127403	Both to location and cell type
ENSG00000080007	0.4228	0.395386	0.181814	Both to location and cell type
ENSG00000080031	0.893118	8.79819e-10	0.106882	High across cell type family
ENSG00000080166	0.914615	0.0434431	0.0419421	High across cell type family
ENSG00000080189	0.836824	0	0.163176	High across cell type family
ENSG00000080200	0.667916	0	0.332084	High across cell type family
ENSG00000080224	0.662945	0.0761378	0.260917	High across cell type family
ENSG00000080293	0.554584	0.231815	0.213602	High across cell type family
ENSG00000080298	0.747206	1.00491e-08	0.252794	High across cell type family
ENSG00000080345	0	0	1	None
ENSG00000080371	0.527524	0.273923	0.198552	Both to location and cell type
ENSG00000080493	0.895714	0	0.104286	High across cell type family
ENSG00000080503	0.868157	0.0144593	0.117383	High across cell type family
ENSG00000080511	0.633283	0.10473	0.261988	High across cell type family
ENSG00000080546	0	0.381132	0.618868	High across location
ENSG00000080561	0	0.0548359	0.945164	None
ENSG00000080572	0.578819	0	0.421181	High across cell type family
ENSG00000080573	0.905312	0.0702285	0.0244596	High across cell type family
ENSG00000080603	0.286162	0	0.713838	High across cell type family
ENSG00000080608	0.323668	0	0.676332	High across cell type family
ENSG00000080618	0.161955	0.209195	0.62885	None
ENSG00000080644	0.216265	0.312373	0.471362	High across location
ENSG00000080709	0.0425835	0.0492746	0.908142	None
ENSG00000080802	0.578156	0.156214	0.265629	High across cell type family
ENSG00000080815	0.673356	0.224869	0.101774	High across cell type family
ENSG00000080819	0.699491	0	0.300509	High across cell type family
ENSG00000080822	0.07993	0.733756	0.186314	High across location
ENSG00000080823	0.925781	0.00465313	0.0695663	High across cell type family
ENSG00000080824	0.111043	0.727292	0.161665	High across location
ENSG00000080839	0.0021447	0.355585	0.64227	High across location
ENSG00000080845	0.51964	0.109407	0.370953	High across cell type family
ENSG00000080854	0.931084	0.0303183	0.038598	High across cell type family
ENSG00000080986	0	0.102537	0.897463	None
ENSG00000081014	0.0806323	0.343394	0.575973	High across location
ENSG00000081019	0.838484	0	0.161516	High across cell type family
ENSG00000081026	0.184395	0.285889	0.529715	High across location
ENSG00000081041	0.982697	0	0.0173031	High across cell type family
ENSG00000081051	0	0	1	None
ENSG00000081052	0.0271682	0.617413	0.355418	High across location
ENSG00000081059	0.734381	0	0.265619	High across cell type family
ENSG00000081087	0	0	1	None
ENSG00000081138	0.901475	0	0.0985247	High across cell type family
ENSG00000081148	0.662416	0	0.337584	High across cell type family
ENSG00000081154	0.93819	0.0230307	0.0387796	High across cell type family
ENSG00000081177	0.906776	0.0697549	0.0234689	High across cell type family
ENSG00000081181	0.884584	0.097522	0.017894	High across cell type family
ENSG00000081189	0	0.536202	0.463798	High across location
ENSG00000081237	0.727064	0.167271	0.105665	High across cell type family
ENSG00000081248	0.636483	0.121208	0.242309	High across cell type family
ENSG00000081277	0.00564599	0.271823	0.722531	High across location
ENSG00000081307	0.769384	0.05616	0.174456	High across cell type family
ENSG00000081320	0.874319	0.0410945	0.0845862	High across cell type family
ENSG00000081377	0.748086	0.113054	0.13886	High across cell type family
ENSG00000081386	0.633154	0.243118	0.123728	High across cell type family
ENSG00000081479	0.208244	0.149828	0.641928	None
ENSG00000081665	0.209735	0.278197	0.512068	High across location
ENSG00000081692	0.0166584	0	0.983342	None
ENSG00000081721	0.571487	0.249251	0.179261	High across cell type family
ENSG00000081760	0.648614	0	0.351386	High across cell type family
ENSG00000081791	0.770018	0	0.229982	High across cell type family
ENSG00000081800	0	0	1	None
ENSG00000081803	0	0.0705053	0.929495	None
ENSG00000081818	0.713266	0.113361	0.173373	High across cell type family
ENSG00000081842	0.890226	0	0.109774	High across cell type family
ENSG00000081853	0	0	1	None
ENSG00000081870	0.0598391	0.882607	0.0575543	High across location
ENSG00000081913	0.964001	0.000519906	0.0354795	High across cell type family
ENSG00000081923	3.42517e-09	0.171919	0.828081	None
ENSG00000081985	0.721105	0.0680493	0.210845	High across cell type family
ENSG00000082014	0.84305	0.0246158	0.132334	High across cell type family
ENSG00000082068	0.675908	0	0.324092	High across cell type family
ENSG00000082074	0.799658	0.00403465	0.196307	High across cell type family
ENSG00000082126	0.913491	0	0.086509	High across cell type family
ENSG00000082146	0	0	1	None
ENSG00000082153	0.762792	0	0.237208	High across cell type family
ENSG00000082175	0.291037	0	0.708963	High across cell type family
ENSG00000082196	0.270104	0.521304	0.208592	Both to location and cell type
ENSG00000082212	0	0	1	None
ENSG00000082213	0.337864	0	0.662136	High across cell type family
ENSG00000082258	0.938225	0	0.0617752	High across cell type family
ENSG00000082269	0	0.409996	0.590004	High across location
ENSG00000082293	0.951119	0	0.0488813	High across cell type family
ENSG00000082397	0.954526	0.0324925	0.0129815	High across cell type family
ENSG00000082438	0	0	1	None
ENSG00000082458	0.793901	0.0663419	0.139757	High across cell type family
ENSG00000082482	0.328494	0.0109087	0.660598	High across cell type family
ENSG00000082497	0	0.400792	0.599208	High across location
ENSG00000082512	0.0308397	0.493516	0.475644	High across location
ENSG00000082515	0.590209	9.28957e-10	0.409791	High across cell type family
ENSG00000082516	0.128138	3.97216e-17	0.871862	None
ENSG00000082556	0.966639	0.0288649	0.00449593	High across cell type family
ENSG00000082641	0.0375495	0.676895	0.285556	High across location
ENSG00000082684	1.2131e-16	0.255255	0.744745	High across location
ENSG00000082701	0.888903	0	0.111097	High across cell type family
ENSG00000082781	0.970232	0.0085801	0.0211874	High across cell type family
ENSG00000082805	0.796315	0.09213	0.111555	High across cell type family
ENSG00000082898	0.995129	1.39543e-11	0.00487112	High across cell type family
ENSG00000082996	0.186977	0.618371	0.194652	High across location
ENSG00000083067	0.707507	0.0451829	0.24731	High across cell type family
ENSG00000083093	0.110518	0.0170327	0.872449	None
ENSG00000083097	0.903599	0.0642617	0.0321393	High across cell type family
ENSG00000083099	0.257115	0	0.742885	High across cell type family
ENSG00000083123	0.993137	0.00314477	0.0037184	High across cell type family
ENSG00000083168	0.901042	0	0.0989581	High across cell type family
ENSG00000083223	0.520547	0.35043	0.129023	Both to location and cell type
ENSG00000083290	0.472927	0	0.527073	High across cell type family
ENSG00000083307	0.170384	0	0.829616	None
ENSG00000083312	0.74989	0.100664	0.149446	High across cell type family
ENSG00000083444	0.74591	0.103318	0.150773	High across cell type family
ENSG00000083454	0.884878	0	0.115122	High across cell type family
ENSG00000083457	0	0.363585	0.636415	High across location
ENSG00000083520	0.106898	0.493893	0.399209	High across location
ENSG00000083535	0.981032	0.00965213	0.00931582	High across cell type family
ENSG00000083544	0.903563	0	0.0964368	High across cell type family
ENSG00000083635	0.902149	0.0627927	0.0350586	High across cell type family
ENSG00000083642	0.173791	0	0.826209	None
ENSG00000083720	0.786817	0.0103121	0.202871	High across cell type family
ENSG00000083750	0	0	1	None
ENSG00000083782	0.0725299	0.0589057	0.868564	None
ENSG00000083799	0.480906	0.155165	0.363929	High across cell type family
ENSG00000083807	0.324152	0.293248	0.382599	Both to location and cell type
ENSG00000083812	0.43414	0.522556	0.0433032	Both to location and cell type
ENSG00000083814	0.957849	0.0179337	0.0242172	High across cell type family
ENSG00000083817	0.919432	1.18441e-11	0.0805679	High across cell type family
ENSG00000083828	0.660521	0	0.339479	High across cell type family
ENSG00000083838	0.881989	0	0.118011	High across cell type family
ENSG00000083844	9.13465e-10	0.0330831	0.966917	None
ENSG00000083845	0.618809	0.321321	0.0598703	Both to location and cell type
ENSG00000083857	0.976773	0.00497668	0.01825	High across cell type family
ENSG00000083896	0.839371	0	0.160629	High across cell type family
ENSG00000083937	9.0788e-11	0.544256	0.455744	High across location
ENSG00000084070	0.975889	0.00133247	0.0227783	High across cell type family
ENSG00000084072	0.977029	0	0.0229713	High across cell type family
ENSG00000084073	0.445115	0.055434	0.499451	High across cell type family
ENSG00000084090	0.522886	0	0.477114	High across cell type family
ENSG00000084092	0.879372	0	0.120628	High across cell type family
ENSG00000084093	0.992851	0.00467842	0.00247013	High across cell type family
ENSG00000084110	0.207898	0.279972	0.512129	High across location
ENSG00000084112	0.507867	0	0.492133	High across cell type family
ENSG00000084207	0	0.462439	0.537561	High across location
ENSG00000084234	0.956964	0	0.0430357	High across cell type family
ENSG00000084444	0	0.403793	0.596207	High across location
ENSG00000084453	0.952914	0.0426578	0.00442793	High across cell type family
ENSG00000084463	0.674506	0	0.325494	High across cell type family
ENSG00000084623	0.678446	0.195489	0.126065	High across cell type family
ENSG00000084628	0.75338	0.0425408	0.204079	High across cell type family
ENSG00000084636	0.943091	0	0.0569086	High across cell type family
ENSG00000084652	0.85873	0	0.14127	High across cell type family
ENSG00000084674	0.471536	0	0.528464	High across cell type family
ENSG00000084676	0.953829	0.0258871	0.0202843	High across cell type family
ENSG00000084693	0	0	1	None
ENSG00000084710	0.315324	0	0.684676	High across cell type family
ENSG00000084731	0.982108	1.88899e-15	0.0178916	High across cell type family
ENSG00000084733	0.865516	0	0.134484	High across cell type family
ENSG00000084734	0.249908	0	0.750092	None
ENSG00000084754	0.899577	0.0154947	0.0849285	High across cell type family
ENSG00000084764	0.854351	0.0824077	0.0632412	High across cell type family
ENSG00000084774	0.954593	0	0.0454069	High across cell type family
ENSG00000085063	0	0.575039	0.424961	High across location
ENSG00000085117	0.966795	0.0173197	0.0158856	High across cell type family
ENSG00000085185	0.959072	0.0121647	0.0287636	High across cell type family
ENSG00000085224	0.527178	7.42168e-11	0.472822	High across cell type family
ENSG00000085231	0	0.216751	0.783249	None
ENSG00000085265	6.01131e-06	0.799136	0.200858	High across location
ENSG00000085274	0.790888	0	0.209112	High across cell type family
ENSG00000085276	0.397392	0	0.602608	High across cell type family
ENSG00000085365	0.271621	0	0.728379	High across cell type family
ENSG00000085377	0	0	1	None
ENSG00000085382	0.891149	0.0935551	0.0152958	High across cell type family
ENSG00000085415	0.76279	0	0.23721	High across cell type family
ENSG00000085433	0.796998	0.171352	0.0316504	High across cell type family
ENSG00000085449	0.84702	0.150938	0.00204175	High across cell type family
ENSG00000085465	0.918102	0.0147259	0.0671721	High across cell type family
ENSG00000085491	0.763694	0.0290915	0.207215	High across cell type family
ENSG00000085511	6.36928e-10	0.530421	0.469579	High across location
ENSG00000085514	0.293269	0	0.706731	High across cell type family
ENSG00000085552	0.323915	0	0.676085	High across cell type family
ENSG00000085563	0.963009	0	0.0369906	High across cell type family
ENSG00000085644	0	0.261395	0.738605	High across location
ENSG00000085662	0.685651	0	0.314349	High across cell type family
ENSG00000085719	0.847157	0	0.152843	High across cell type family
ENSG00000085721	0.431674	0	0.568326	High across cell type family
ENSG00000085733	0.0395139	0	0.960486	None
ENSG00000085741	0.658726	0.258643	0.082631	Both to location and cell type
ENSG00000085760	0.916576	0.0247475	0.058677	High across cell type family
ENSG00000085788	0.893326	0.0198125	0.0868612	High across cell type family
ENSG00000085831	0.917474	0.0806181	0.00190773	High across cell type family
ENSG00000085832	0.883847	0.00636082	0.109792	High across cell type family
ENSG00000085840	0.218913	0.737011	0.0440766	High across location
ENSG00000085871	0.728882	0.0678348	0.203283	High across cell type family
ENSG00000085872	0.654861	0	0.345139	High across cell type family
ENSG00000085978	0.775606	3.44685e-11	0.224394	High across cell type family
ENSG00000085982	0.973704	0.0129682	0.0133274	High across cell type family
ENSG00000085998	0.415343	4.26706e-10	0.584657	High across cell type family
ENSG00000085999	0.411269	0	0.588731	High across cell type family
ENSG00000086015	0.432145	0	0.567855	High across cell type family
ENSG00000086061	0.850716	0	0.149284	High across cell type family
ENSG00000086062	0	0	1	None
ENSG00000086065	0.7205	0.110249	0.169251	High across cell type family
ENSG00000086102	8.42519e-10	0	1	None
ENSG00000086159	0.979525	0.0131066	0.00736834	High across cell type family
ENSG00000086189	0.274592	0	0.725408	High across cell type family
ENSG00000086200	0.795779	0.161044	0.0431776	High across cell type family
ENSG00000086205	0.859457	0.103179	0.0373638	High across cell type family
ENSG00000086232	0.3633	0	0.6367	High across cell type family
ENSG00000086288	0	0.196486	0.803514	None
ENSG00000086289	0.885825	0.0403811	0.073794	High across cell type family
ENSG00000086300	0.981849	0.0150595	0.00309164	High across cell type family
ENSG00000086475	1.12583e-07	0.544802	0.455198	High across location
ENSG00000086504	0.666351	0.203523	0.130125	High across cell type family
ENSG00000086506	0.747687	0	0.252313	High across cell type family
ENSG00000086544	0.862516	4.46239e-11	0.137484	High across cell type family
ENSG00000086548	0.362067	0	0.637933	High across cell type family
ENSG00000086570	0.376444	0.165947	0.457609	High across cell type family
ENSG00000086589	0.27964	0.233181	0.487179	High across cell type family
ENSG00000086598	0.980126	0.00453262	0.0153413	High across cell type family
ENSG00000086619	0.865618	0.00589466	0.128488	High across cell type family
ENSG00000086666	0.964852	0.00390439	0.0312439	High across cell type family
ENSG00000086696	0.167093	0.397397	0.43551	High across location
ENSG00000086712	0.890901	0.0787005	0.0303983	High across cell type family
ENSG00000086717	0.0633261	0.0125076	0.924166	None
ENSG00000086730	0.373512	0	0.626488	High across cell type family
ENSG00000086758	0.758612	0.223114	0.0182743	High across cell type family
ENSG00000086827	0.328295	8.31789e-18	0.671705	High across cell type family
ENSG00000086848	0	0.361763	0.638237	High across location
ENSG00000086967	0.631008	0.140495	0.228497	High across cell type family
ENSG00000086991	0	0	1	None
ENSG00000087008	0.753347	0	0.246653	High across cell type family
ENSG00000087053	0.601819	0	0.398181	High across cell type family
ENSG00000087074	0.0304053	4.85585e-09	0.969595	None
ENSG00000087076	0.957955	0.00573817	0.0363069	High across cell type family
ENSG00000087077	0.992957	0.00475476	0.00228805	High across cell type family
ENSG00000087085	0.425001	0.253675	0.321324	Both to location and cell type
ENSG00000087086	0.251566	0	0.748434	High across cell type family
ENSG00000087087	0.97241	0	0.0275897	High across cell type family
ENSG00000087088	9.37249e-11	0.442673	0.557327	High across location
ENSG00000087095	0.10842	0.086962	0.804618	None
ENSG00000087111	0	0.573166	0.426834	High across location
ENSG00000087116	0.747457	0.207708	0.0448344	High across cell type family
ENSG00000087152	0.648526	0	0.351474	High across cell type family
ENSG00000087157	0	0	1	None
ENSG00000087191	0.00642714	0.728786	0.264787	High across location
ENSG00000087206	0.425362	0.109471	0.465167	High across cell type family
ENSG00000087237	0	0	1	None
ENSG00000087245	0.126968	0.306393	0.566639	High across location
ENSG00000087250	0.94582	0	0.0541798	High across cell type family
ENSG00000087253	0.746133	0.0174093	0.236458	High across cell type family
ENSG00000087258	0.637921	0.0577231	0.304356	High across cell type family
ENSG00000087263	0	0	1	None
ENSG00000087266	0.976929	0.0133528	0.00971826	High across cell type family
ENSG00000087269	0	0	1	None
ENSG00000087274	0.957211	1.10859e-10	0.0427892	High across cell type family
ENSG00000087299	0.90314	0.0230092	0.0738511	High across cell type family
ENSG00000087301	0.923004	0	0.0769958	High across cell type family
ENSG00000087302	0.829778	2.01996e-10	0.170222	High across cell type family
ENSG00000087303	0	0	1	None
ENSG00000087338	0.909273	0.0190481	0.071679	High across cell type family
ENSG00000087365	0.570644	0.242359	0.186997	High across cell type family
ENSG00000087448	0.536211	0	0.463789	High across cell type family
ENSG00000087460	0.605537	0.124286	0.270178	High across cell type family
ENSG00000087470	0.699626	0.238677	0.0616971	High across cell type family
ENSG00000087494	0.565303	0	0.434697	High across cell type family
ENSG00000087495	0.167216	0	0.832784	None
ENSG00000087502	0.807515	0	0.192485	High across cell type family
ENSG00000087510	0.646303	0	0.353697	High across cell type family
ENSG00000087586	0	0	1	None
ENSG00000087589	0.770927	0	0.229073	High across cell type family
ENSG00000087842	0.667641	0.0415312	0.290827	High across cell type family
ENSG00000087884	0.875532	0.0146626	0.109805	High across cell type family
ENSG00000087903	0.975115	7.34966e-12	0.0248846	High across cell type family
ENSG00000087995	0.421615	0.306464	0.271921	Both to location and cell type
ENSG00000088002	0.595181	2.11327e-09	0.404819	High across cell type family
ENSG00000088035	0	0	1	None
ENSG00000088038	0.92489	0	0.0751103	High across cell type family
ENSG00000088053	0.957318	0.0302503	0.0124319	High across cell type family
ENSG00000088179	0.40265	0.0671412	0.530209	High across cell type family
ENSG00000088205	0.324723	0	0.675277	High across cell type family
ENSG00000088247	0.811217	0.139453	0.0493296	High across cell type family
ENSG00000088256	0	0	1	None
ENSG00000088280	0.943212	0	0.0567879	High across cell type family
ENSG00000088298	0	0.203553	0.796447	None
ENSG00000088305	0.82496	0	0.17504	High across cell type family
ENSG00000088320	0	0	1	None
ENSG00000088325	0.622536	0.0562353	0.321228	High across cell type family
ENSG00000088356	0.121862	0.716506	0.161632	High across location
ENSG00000088367	0.240412	0.173419	0.586169	None
ENSG00000088386	0.018144	0.282369	0.699487	High across location
ENSG00000088387	0.97242	0.00844146	0.0191389	High across cell type family
ENSG00000088448	0.593287	0.055539	0.351174	High across cell type family
ENSG00000088451	0.16494	7.81948e-19	0.83506	None
ENSG00000088538	0.943909	0.0321052	0.0239861	High across cell type family
ENSG00000088543	0.0613692	0	0.938631	None
ENSG00000088682	0.962454	9.76699e-11	0.0375458	High across cell type family
ENSG00000088726	0	0.47028	0.52972	High across location
ENSG00000088727	0.418907	0	0.581093	High across cell type family
ENSG00000088756	0	0	1	None
ENSG00000088766	0.401511	0.279546	0.318943	Both to location and cell type
ENSG00000088782	0.594286	0	0.405714	High across cell type family
ENSG00000088808	0.841596	0.0601754	0.0982286	High across cell type family
ENSG00000088812	0.709527	0.218259	0.0722139	High across cell type family
ENSG00000088826	0.990513	5.01485e-11	0.00948662	High across cell type family
ENSG00000088827	0.357376	0.00485483	0.637769	High across cell type family
ENSG00000088832	0.749544	0.066539	0.183917	High across cell type family
ENSG00000088833	0	0.06067	0.93933	None
ENSG00000088836	0.922594	0	0.0774059	High across cell type family
ENSG00000088854	0.897256	0.0353144	0.0674293	High across cell type family
ENSG00000088876	0.278879	0.143994	0.577127	High across cell type family
ENSG00000088881	0.654294	0.0223232	0.323383	High across cell type family
ENSG00000088882	0.509254	0.267247	0.223499	Both to location and cell type
ENSG00000088888	0.942955	0.00370156	0.0533434	High across cell type family
ENSG00000088899	0.407206	0.192171	0.400623	High across cell type family
ENSG00000088926	0.746	0.0709282	0.183071	High across cell type family
ENSG00000088930	0.249871	0.586782	0.163347	High across location
ENSG00000088970	0.355663	0.234096	0.410241	High across cell type family
ENSG00000088986	0.490216	0.152438	0.357345	High across cell type family
ENSG00000088992	0.390895	0.428251	0.180854	Both to location and cell type
ENSG00000089006	0.539429	0.204714	0.255857	High across cell type family
ENSG00000089009	0.865536	0.08665	0.0478142	High across cell type family
ENSG00000089012	0.18643	0	0.81357	None
ENSG00000089022	0	0.117277	0.882723	None
ENSG00000089041	0.374436	0	0.625564	High across cell type family
ENSG00000089048	0.832228	0.148408	0.0193637	High across cell type family
ENSG00000089050	0	0.0818043	0.918196	None
ENSG00000089053	0	0.298405	0.701595	High across location
ENSG00000089057	0.68025	0	0.31975	High across cell type family
ENSG00000089060	0.72676	0	0.27324	High across cell type family
ENSG00000089063	0.54433	0.0664274	0.389242	High across cell type family
ENSG00000089091	0.381051	0.265148	0.353801	Both to location and cell type
ENSG00000089094	0	0.237714	0.762286	None
ENSG00000089101	0.268783	0	0.731217	High across cell type family
ENSG00000089116	8.31215e-09	0.380605	0.619395	High across location
ENSG00000089123	0.763093	0.139261	0.097646	High across cell type family
ENSG00000089127	0	0	1	None
ENSG00000089154	0.950809	1.13015e-10	0.0491907	High across cell type family
ENSG00000089157	0.434058	0.376906	0.189036	Both to location and cell type
ENSG00000089159	0.92923	0.0540871	0.0166825	High across cell type family
ENSG00000089163	0.771003	0	0.228997	High across cell type family
ENSG00000089169	0.666705	0	0.333295	High across cell type family
ENSG00000089177	0.666213	0.232706	0.101081	High across cell type family
ENSG00000089195	0.958989	0.0183999	0.0226115	High across cell type family
ENSG00000089199	0.865151	0.0712662	0.0635829	High across cell type family
ENSG00000089220	0.709618	0.175162	0.11522	High across cell type family
ENSG00000089225	0.457285	0.0806578	0.462057	High across cell type family
ENSG00000089234	0	0	1	None
ENSG00000089248	0.801506	4.72691e-08	0.198494	High across cell type family
ENSG00000089250	0.612604	0.0650737	0.322323	High across cell type family
ENSG00000089280	0.860928	0.0727269	0.0663456	High across cell type family
ENSG00000089289	0	0.0750882	0.924912	None
ENSG00000089327	0.254357	0	0.745643	High across cell type family
ENSG00000089335	0.883417	0.000853419	0.11573	High across cell type family
ENSG00000089351	0.945677	0.011741	0.0425817	High across cell type family
ENSG00000089356	0.988337	0.00696551	0.00469772	High across cell type family
ENSG00000089472	0.880748	0.00612943	0.113123	High across cell type family
ENSG00000089486	0.731782	0.190969	0.0772486	High across cell type family
ENSG00000089505	3.18677e-18	0	1	None
ENSG00000089558	0	0.26549	0.73451	High across location
ENSG00000089597	0.911169	0.0225355	0.0662956	High across cell type family
ENSG00000089639	0.75765	0	0.24235	High across cell type family
ENSG00000089682	0.0705214	0	0.929479	None
ENSG00000089685	0.028916	0.902578	0.0685056	High across location
ENSG00000089692	0	0.0745822	0.925418	None
ENSG00000089693	0.951813	0.0105296	0.0376578	High across cell type family
ENSG00000089723	0.326556	0.195434	0.47801	High across cell type family
ENSG00000089737	0.789538	0.122455	0.0880071	High across cell type family
ENSG00000089775	0.931607	0.0302762	0.0381168	High across cell type family
ENSG00000089818	0.976306	0.0178675	0.00582647	High across cell type family
ENSG00000089820	0	0	1	None
ENSG00000089847	0	0	1	None
ENSG00000089876	0.339595	0.0875379	0.572867	High across cell type family
ENSG00000089902	0.674891	0.178771	0.146338	High across cell type family
ENSG00000089916	0.166123	0.17552	0.658357	None
ENSG00000090006	0.584646	5.06561e-10	0.415354	High across cell type family
ENSG00000090013	1.67669e-08	0.36357	0.63643	High across location
ENSG00000090020	0.868877	0	0.131123	High across cell type family
ENSG00000090054	0	0	1	None
ENSG00000090060	0.448123	7.25696e-10	0.551877	High across cell type family
ENSG00000090061	0.885628	0	0.114372	High across cell type family
ENSG00000090097	0.557082	0	0.442918	High across cell type family
ENSG00000090104	0.725839	0.251766	0.0223954	Both to location and cell type
ENSG00000090238	0.816823	0.0847291	0.098448	High across cell type family
ENSG00000090263	0.162172	9.70056e-10	0.837828	None
ENSG00000090266	0.692732	0.0859321	0.221336	High across cell type family
ENSG00000090273	0.865147	0.117616	0.0172367	High across cell type family
ENSG00000090316	0.0150508	0	0.984949	None
ENSG00000090339	0.852028	0	0.147972	High across cell type family
ENSG00000090372	0	0.480837	0.519163	High across location
ENSG00000090376	0.182654	0	0.817346	None
ENSG00000090382	0.433422	0.202804	0.363775	High across cell type family
ENSG00000090402	0.672859	0	0.327141	High across cell type family
ENSG00000090432	0.148341	0.190044	0.661615	None
ENSG00000090447	0.00337738	0.325176	0.671447	High across location
ENSG00000090470	0.946888	0	0.0531118	High across cell type family
ENSG00000090487	0.940761	0.024005	0.0352342	High across cell type family
ENSG00000090512	0.053844	0	0.946156	None
ENSG00000090520	0.76541	0	0.23459	High across cell type family
ENSG00000090530	0.435946	0	0.564054	High across cell type family
ENSG00000090534	3.42621e-11	0.676758	0.323242	High across location
ENSG00000090539	0	0.149499	0.850501	None
ENSG00000090554	0.938862	0.00164835	0.0594893	High across cell type family
ENSG00000090565	0.0080896	0	0.99191	None
ENSG00000090581	0.816827	0	0.183173	High across cell type family
ENSG00000090612	0.860652	0.0840198	0.0553278	High across cell type family
ENSG00000090615	0.867424	0	0.132576	High across cell type family
ENSG00000090621	0.936833	0.0297664	0.0334007	High across cell type family
ENSG00000090659	0.21597	0	0.78403	None
ENSG00000090661	1.61492e-20	0.278338	0.721662	High across location
ENSG00000090674	0.810957	0.0884233	0.10062	High across cell type family
ENSG00000090686	0.752424	0.181819	0.0657571	High across cell type family
ENSG00000090776	0	0.177081	0.822919	None
ENSG00000090857	0.851985	0	0.148015	High across cell type family
ENSG00000090861	0.944828	0	0.0551722	High across cell type family
ENSG00000090863	0.877336	0	0.122664	High across cell type family
ENSG00000090889	0.579318	0.12358	0.297103	High across cell type family
ENSG00000090905	0.296288	3.49318e-09	0.703712	High across cell type family
ENSG00000090924	0.84947	0	0.15053	High across cell type family
ENSG00000090932	0.47594	0.0412928	0.482767	High across cell type family
ENSG00000090971	0.820761	0	0.179239	High across cell type family
ENSG00000090975	0.637026	0	0.362974	High across cell type family
ENSG00000090989	0.497034	0.336072	0.166893	Both to location and cell type
ENSG00000091009	0.228989	0.261766	0.509246	High across location
ENSG00000091010	0	0.000892148	0.999108	None
ENSG00000091039	0.970361	0.0161946	0.0134442	High across cell type family
ENSG00000091073	0	0	1	None
ENSG00000091106	0.956189	0	0.0438113	High across cell type family
ENSG00000091127	0.618297	0	0.381703	High across cell type family
ENSG00000091128	0.656304	0.0332732	0.310423	High across cell type family
ENSG00000091129	0.255882	0.0913462	0.652772	High across cell type family
ENSG00000091136	0.934061	0.0295761	0.0363632	High across cell type family
ENSG00000091137	0	0.00697092	0.993029	None
ENSG00000091138	0.65502	0.143488	0.201492	High across cell type family
ENSG00000091140	0.889251	0	0.110749	High across cell type family
ENSG00000091157	0.879802	0.0935666	0.0266314	High across cell type family
ENSG00000091164	0.951307	0	0.0486929	High across cell type family
ENSG00000091181	0.74326	0.169852	0.0868889	High across cell type family
ENSG00000091262	0.934827	0	0.0651732	High across cell type family
ENSG00000091317	0	0	1	None
ENSG00000091409	0.838005	0.0555127	0.106482	High across cell type family
ENSG00000091428	0.993201	0.00304015	0.00375911	High across cell type family
ENSG00000091436	0.846792	1.62168e-09	0.153208	High across cell type family
ENSG00000091482	0.407403	0.346139	0.246458	Both to location and cell type
ENSG00000091483	0.319341	0	0.680659	High across cell type family
ENSG00000091490	0.104006	0	0.895994	None
ENSG00000091513	0.923671	0.034961	0.0413678	High across cell type family
ENSG00000091527	0.60765	0.131758	0.260593	High across cell type family
ENSG00000091536	0.920136	0.0262122	0.0536513	High across cell type family
ENSG00000091542	0	0	1	None
ENSG00000091583	0	0	1	None
ENSG00000091592	0.507186	5.36664e-16	0.492814	High across cell type family
ENSG00000091622	0.950132	0.0463471	0.00352125	High across cell type family
ENSG00000091640	3.76952e-08	0.127015	0.872985	None
ENSG00000091651	0.816285	0.00558069	0.178134	High across cell type family
ENSG00000091656	0.285009	0	0.714991	High across cell type family
ENSG00000091664	0.872393	0.114769	0.0128379	High across cell type family
ENSG00000091704	0	0	1	None
ENSG00000091732	0.361438	0	0.638562	High across cell type family
ENSG00000091831	0.0416734	0	0.958327	None
ENSG00000091844	0.83982	0	0.16018	High across cell type family
ENSG00000091879	0.687447	0	0.312553	High across cell type family
ENSG00000091947	0.216657	0	0.783343	None
ENSG00000091972	0.923851	1.47796e-10	0.0761494	High across cell type family
ENSG00000091986	0.938043	0	0.0619574	High across cell type family
ENSG00000092010	0.603693	0.195536	0.200771	High across cell type family
ENSG00000092020	0.792946	0	0.207054	High across cell type family
ENSG00000092036	0.757783	0.197969	0.0442476	High across cell type family
ENSG00000092051	0.780792	0.0353884	0.183819	High across cell type family
ENSG00000092054	0.380766	0	0.619234	High across cell type family
ENSG00000092067	0.681578	0.0791593	0.239262	High across cell type family
ENSG00000092068	0.9039	0.0495502	0.0465497	High across cell type family
ENSG00000092094	0.459762	0	0.540238	High across cell type family
ENSG00000092096	0.709119	4.71622e-11	0.290881	High across cell type family
ENSG00000092098	0.869692	0	0.130308	High across cell type family
ENSG00000092108	0.430996	0.421931	0.147073	Both to location and cell type
ENSG00000092140	0.637629	0.312238	0.0501338	Both to location and cell type
ENSG00000092148	0.595782	0	0.404218	High across cell type family
ENSG00000092199	0.554113	0	0.445887	High across cell type family
ENSG00000092200	0	0	1	None
ENSG00000092201	0.427732	0.413737	0.158531	Both to location and cell type
ENSG00000092203	0.211264	1.09038e-17	0.788736	None
ENSG00000092208	0	0	1	None
ENSG00000092295	0.00801092	0.393357	0.598632	High across location
ENSG00000092330	0	0.621942	0.378058	High across location
ENSG00000092345	0.230541	0.0491347	0.720324	None
ENSG00000092377	0.554933	0	0.445067	High across cell type family
ENSG00000092421	0.458516	0.0974588	0.444025	High across cell type family
ENSG00000092439	0	0.018795	0.981205	None
ENSG00000092445	0.196323	6.11422e-09	0.803677	None
ENSG00000092470	0	0.0777928	0.922207	None
ENSG00000092529	0.955984	0.0415851	0.00243101	High across cell type family
ENSG00000092531	0.908924	0.0188673	0.072209	High across cell type family
ENSG00000092607	0.777695	0	0.222305	High across cell type family
ENSG00000092621	0.997476	0.000867162	0.00165646	High across cell type family
ENSG00000092758	0.849245	3.99289e-19	0.150755	High across cell type family
ENSG00000092820	0.955028	2.50011e-16	0.0449721	High across cell type family
ENSG00000092841	0	0.554635	0.445365	High across location
ENSG00000092847	0.482547	0.150197	0.367256	High across cell type family
ENSG00000092850	0.58097	0	0.41903	High across cell type family
ENSG00000092853	0.810526	0	0.189474	High across cell type family
ENSG00000092871	0.916417	0.0349404	0.0486429	High across cell type family
ENSG00000092929	0.957797	0.0106403	0.0315627	High across cell type family
ENSG00000092931	0.153442	0	0.846558	None
ENSG00000092964	0	0	1	None
ENSG00000092969	0.918914	0.010584	0.0705021	High across cell type family
ENSG00000092978	0.855378	0.0554047	0.0892169	High across cell type family
ENSG00000093000	0.935093	1.12968e-23	0.0649071	High across cell type family
ENSG00000093009	0	0.157169	0.842831	None
ENSG00000093010	0.867518	0.131084	0.00139805	High across cell type family
ENSG00000093072	0.618346	0	0.381654	High across cell type family
ENSG00000093144	0.140551	0.461428	0.398021	High across location
ENSG00000093167	0.108231	0.241897	0.649872	None
ENSG00000093183	0.902379	2.04462e-11	0.0976205	High across cell type family
ENSG00000093217	0.925123	0	0.0748767	High across cell type family
ENSG00000094631	0.916329	0.0736876	0.00998311	High across cell type family
ENSG00000094755	0	1.89365e-17	1	None
ENSG00000094796	0.56675	0.210652	0.222598	High across cell type family
ENSG00000094804	0	0.00429224	0.995708	None
ENSG00000094841	0	0	1	None
ENSG00000094880	0.559863	3.42181e-10	0.440137	High across cell type family
ENSG00000094914	0.967064	0.0135148	0.0194212	High across cell type family
ENSG00000094916	0.792657	0.077758	0.129585	High across cell type family
ENSG00000094963	0.883593	1.51712e-17	0.116407	High across cell type family
ENSG00000094975	0.699378	0	0.300622	High across cell type family
ENSG00000095002	0.972251	0	0.0277489	High across cell type family
ENSG00000095015	0.132302	0.299205	0.568493	High across location
ENSG00000095059	0.20651	0.741011	0.0524795	High across location
ENSG00000095066	0.840931	0.0648925	0.0941761	High across cell type family
ENSG00000095110	0	0	1	None
ENSG00000095139	0.672406	0.0418176	0.285777	High across cell type family
ENSG00000095203	0.744111	0	0.255889	High across cell type family
ENSG00000095209	0.458432	0.145342	0.396227	High across cell type family
ENSG00000095261	0	0	1	None
ENSG00000095303	0	0.479181	0.520819	High across location
ENSG00000095319	0.960065	0.00867108	0.0312644	High across cell type family
ENSG00000095321	0.397096	0.267295	0.335609	Both to location and cell type
ENSG00000095370	0.996091	0.00320515	0.000703919	High across cell type family
[truncated: 16,647 more rows]

## Sheet: Mmus.AST-GABA
Table S5. LMM results for mice astrocytes-GABA.
Gene	Cell type	location	Residual	Category
0610009B22Rik	0.634658	0	0.365342	High across cell type family
0610010K14Rik	0	0	1	None
0610030E20Rik	0.511379	0.467635	0.0209864	Both to location and cell type
0610040J01Rik	0.718928	0.00267609	0.278396	High across cell type family
1110002E22Rik	0.157486	0.475087	0.367427	High across location
1110004F10Rik	0	0.48196	0.51804	High across location
1110017D15Rik	0	0.312748	0.687252	High across location
1110032F04Rik	0.788899	0.116466	0.0946349	High across cell type family
1110038F14Rik	0.75642	0.0997846	0.143795	High across cell type family
1110059E24Rik	0.0455985	0.881846	0.0725551	High across location
1110059G10Rik	0.496016	0.174794	0.32919	High across cell type family
1110065P20Rik	0.536964	0.108777	0.354259	High across cell type family
1190005I06Rik	0.763916	0.165959	0.070125	High across cell type family
1500009L16Rik	0.298187	7.41282e-18	0.701813	High across cell type family
1500011B03Rik	0.932078	0	0.0679221	High across cell type family
1600012H06Rik	0.927192	1.43563e-10	0.0728077	High across cell type family
1600014C10Rik	0.878147	0.0952516	0.0266019	High across cell type family
1600014C23Rik	0.99362	0	0.00638007	High across cell type family
1700001C19Rik	0.113527	0	0.886473	None
1700001F09Rik	0.846129	1.3548e-10	0.153871	High across cell type family
1700001J03Rik	0.723128	0.0279472	0.248924	High across cell type family
1700001O22Rik	0.902725	0.0503532	0.046922	High across cell type family
1700001P01Rik	0	0	1	None
1700003E16Rik	0.598845	0.183486	0.21767	High across cell type family
1700003F12Rik	0	7.5551e-16	1	None
1700008O03Rik	0.829451	0.0668094	0.10374	High across cell type family
1700010I14Rik	0	1.04911e-10	1	None
1700011L22Rik	0.038158	0.0600079	0.901834	None
1700011M02Rik	0.827327	0	0.172673	High across cell type family
1700012B09Rik	0	3.91092e-15	1	None
1700013H16Rik	0	0.271253	0.728747	High across location
1700014D04Rik	0.360401	0	0.639599	High across cell type family
1700015G11Rik	0	0.161686	0.838314	None
1700016C15Rik	0	0.0848801	0.91512	None
1700016H13Rik	0	0	1	None
1700016K19Rik	0	0	1	None
1700017B05Rik	0.80367	4.46955e-11	0.19633	High across cell type family
1700017N19Rik	0.0911977	0.0749029	0.833899	None
1700019A02Rik	0	0.174846	0.825154	None
1700019D03Rik	0.251755	0.00406847	0.744177	High across cell type family
1700019N19Rik	0.113527	0	0.886473	None
1700020L24Rik	0.326364	0.166925	0.506711	High across cell type family
1700022I11Rik	0.657437	0	0.342563	High across cell type family
1700024G13Rik	0.241809	0	0.758191	None
1700025B11Rik	0.15531	0.263778	0.580912	High across location
1700025G04Rik	0.895097	0	0.104903	High across cell type family
1700028J19Rik	0.184825	0.150271	0.664905	None
1700028K03Rik	0.66018	0.283641	0.0561788	Both to location and cell type
1700029F12Rik	0.827327	0	0.172673	High across cell type family
1700029H14Rik	0.657437	0	0.342563	High across cell type family
1700029J07Rik	0.890185	5.41898e-11	0.109815	High across cell type family
1700030J22Rik	0.835664	0.112201	0.0521352	High across cell type family
1700030K09Rik	0.644149	0.184242	0.171609	High across cell type family
1700037C18Rik	0	0	1	None
1700037H04Rik	0.956481	0.00556335	0.0379556	High across cell type family
1700056E22Rik	0.207536	0	0.792464	None
1700066M21Rik	0.507406	0	0.492594	High across cell type family
1700067K01Rik	0.245525	0	0.754475	None
1700088E04Rik	0.748133	0	0.251867	High across cell type family
1700093K21Rik	0.320842	0.292874	0.386284	Both to location and cell type
1700102P08Rik	0.442048	0	0.557952	High across cell type family
1700109H08Rik	0.0349165	0.917955	0.047128	High across location
1700113H08Rik	0	0.347559	0.652441	High across location
1700123K08Rik	0.72664	0	0.27336	High across cell type family
1700123O20Rik	0.893283	6.55925e-19	0.106717	High across cell type family
1810009A15Rik	3.22396e-10	0.62356	0.37644	High across location
1810009J06Rik	0.15531	0.263778	0.580912	High across location
1810010H24Rik	0.710371	0.228621	0.0610084	High across cell type family
1810024B03Rik	0.935845	0	0.0641552	High across cell type family
1810030O07Rik	0.622289	0.0319801	0.345731	High across cell type family
1810037I17Rik	0.876062	0.114685	0.00925344	High across cell type family
1810049J17Rik	0.731589	0.11166	0.156751	High across cell type family
1810055G02Rik	0.69254	0	0.30746	High across cell type family
1810062G17Rik	0.805817	0.0495793	0.144604	High across cell type family
1810065E05Rik	0.0146643	0	0.985336	None
2010003K11Rik	0.456951	0	0.543049	High across cell type family
2010106E10Rik	1.97568e-07	0.059913	0.940087	None
2010109A12Rik	0.270874	0.44329	0.285836	Both to location and cell type
2010315B03Rik	0.306927	1.24059e-09	0.693073	High across cell type family
2200002D01Rik	0.026977	0.912897	0.0601257	High across location
2200002J24Rik	0.207265	0.000672466	0.792062	None
2210016F16Rik	0.63072	0	0.36928	High across cell type family
2210016L21Rik	0.919473	0	0.0805271	High across cell type family
2210408I21Rik	0.243091	0.349413	0.407496	High across location
2210418O10Rik	0.827327	0	0.172673	High across cell type family
2300009A05Rik	0	0	1	None
2310002L09Rik	0.827327	0	0.172673	High across cell type family
2310009B15Rik	0	0.580131	0.419869	High across location
2310011J03Rik	0.856903	0.0790787	0.0640186	High across cell type family
2310022A10Rik	0.922367	0.0600387	0.0175939	High across cell type family
2310022B05Rik	0.980306	2.38203e-11	0.0196941	High across cell type family
2310030G06Rik	0.889226	0	0.110774	High across cell type family
2310033P09Rik	0.306787	0	0.693213	High across cell type family
2310039H08Rik	0.883407	0	0.116593	High across cell type family
2310046K23Rik	0.842018	0	0.157982	High across cell type family
2310057M21Rik	0.794791	0.123955	0.0812538	High across cell type family
2310061I04Rik	0.896964	0	0.103036	High across cell type family
2410002F23Rik	5.59578e-09	0.454326	0.545674	High across location
2410004B18Rik	0	0.878359	0.121641	High across location
2410004P03Rik	0.812096	0.0420507	0.145853	High across cell type family
2410137M14Rik	0.0385842	0	0.961416	None
2510002D24Rik	0.93268	0.0123824	0.0549375	High across cell type family
2510009E07Rik	0.743605	0.129936	0.126458	High across cell type family
2510039O18Rik	0.785186	0.0238481	0.190966	High across cell type family
2610008E11Rik	0.513132	0	0.486868	High across cell type family
2610021A01Rik	0	0	1	None
2610028H24Rik	0.673237	0	0.326763	High across cell type family
2610042L04Rik	0.611183	0.00107932	0.387737	High across cell type family
2610044O15Rik8	0.0897353	0.180897	0.729367	None
2610318N02Rik	0.454908	0.226896	0.318196	High across cell type family
2700049A03Rik	0.645388	0.189071	0.165541	High across cell type family
2700062C07Rik	0.474935	0	0.525065	High across cell type family
2700097O09Rik	0.680428	0	0.319572	High across cell type family
2810004N23Rik	0	0.450446	0.549554	High across location
2810021J22Rik	0	0	1	None
2810408A11Rik	0.755859	0.147517	0.096624	High across cell type family
2810459M11Rik	0.970233	0	0.0297674	High across cell type family
2900026A02Rik	1.56466e-09	0.436004	0.563996	High across location
2900092C05Rik	0.652901	0.238252	0.108847	High across cell type family
3110009E18Rik	0.0154869	0	0.984513	None
3110040N11Rik	0.78496	0	0.21504	High across cell type family
3110082I17Rik	0.829093	0	0.170907	High across cell type family
3300002I08Rik	0.686795	0.238059	0.0751456	High across cell type family
3425401B19Rik	0.245158	0	0.754842	None
3830406C13Rik	0	0	1	None
4833420G17Rik	0.631418	0.188108	0.180475	High across cell type family
4833439L19Rik	0.934877	0	0.0651229	High across cell type family
4921504E06Rik	0.579591	0.131612	0.288797	High across cell type family
4921507P07Rik	0.388981	0	0.611019	High across cell type family
4921517D22Rik	0.827327	0	0.172673	High across cell type family
4921524J17Rik	0	0	1	None
4921536K21Rik	0.445027	0	0.554973	High across cell type family
4921539E11Rik	0.657437	0	0.342563	High across cell type family
4930407I10Rik	0.15531	0.263778	0.580912	High across location
4930430F08Rik	0.855968	0.12459	0.0194418	High across cell type family
4930438A08Rik	0.827327	0	0.172673	High across cell type family
4930444P10Rik	0.572002	0.425232	0.002766	Both to location and cell type
4930447C04Rik	0.933759	0.0535303	0.0127102	High across cell type family
4930449I24Rik	0	0.271252	0.728748	High across location
4930451I11Rik	3.11649e-09	0.0696408	0.930359	None
4930453N24Rik	0.894483	0.085426	0.0200909	High across cell type family
4930455H04Rik	0.113527	0	0.886473	None
4930486L24Rik	0	0.293578	0.706422	High across location
4930503B20Rik	0.827327	0	0.172673	High across cell type family
4930503L19Rik	0.723833	0	0.276167	High across cell type family
4930505A04Rik	0	0	1	None
4930519G04Rik	0.652901	0.238252	0.108847	High across cell type family
4930522L14Rik	0	0	1	None
4930523C07Rik	0.560045	0.129172	0.310783	High across cell type family
4930524B15Rik	0	0.167064	0.832936	None
4930550C14Rik	0.848541	0.116019	0.03544	High across cell type family
4930556J24Rik	0	0.0634012	0.936599	None
4930558K02Rik	0.507566	0	0.492434	High across cell type family
4930562C15Rik	0	0.127813	0.872187	None
4930579G24Rik	0.632302	0	0.367698	High across cell type family
4930590J08Rik	0.781655	0	0.218345	High across cell type family
4931406B18Rik	0.827327	0	0.172673	High across cell type family
4931406C07Rik	0.995998	1.01279e-11	0.00400229	High across cell type family
4931414P19Rik	0.113555	0.513235	0.37321	High across location
4931429L15Rik	0.115898	0	0.884102	None
4932414N04Rik	0.827327	0	0.172673	High across cell type family
4932438H23Rik	0.96135	0	0.0386496	High across cell type family
4933402J07Rik	0.827327	0	0.172673	High across cell type family
4933405L10Rik	0.234892	0.46518	0.299928	High across location
4933405O20Rik	0.113527	0	0.886473	None
4933407L21Rik	0.892615	0	0.107385	High across cell type family
4933411K16Rik	0.179967	0.265848	0.554185	High across location
4933424G06Rik	0	0.378596	0.621404	High across location
4933427D14Rik	0.184607	0.0787537	0.73664	None
4933430I17Rik	0.341575	0.503982	0.154442	Both to location and cell type
4933434E20Rik	0	0.241228	0.758772	None
5031439G07Rik	0.822515	0.0790561	0.0984293	High across cell type family
5430403G16Rik	0.422563	0.159727	0.41771	High across cell type family
5730409E04Rik	0.955904	0.0118103	0.0322856	High across cell type family
5730455P16Rik	0.798251	0	0.201749	High across cell type family
5730507C01Rik	0	0	1	None
5730522E02Rik	0.795132	0.160958	0.04391	High across cell type family
6030458C11Rik	0.814405	0.0440652	0.14153	High across cell type family
6030498E09Rik	0	6.77864e-20	1	None
6330403K07Rik	0.409742	0.0345581	0.5557	High across cell type family
6430548M08Rik	0.9675	6.96761e-12	0.0325001	High across cell type family
6430550D23Rik	0.894194	0.0467728	0.0590334	High across cell type family
6430571L13Rik	0.917138	2.71801e-11	0.0828623	High across cell type family
6720489N17Rik	0.531868	0.0177602	0.450372	High across cell type family
6820408C15Rik	0.660367	0	0.339633	High across cell type family
7530416G11Rik	0.673237	0	0.326763	High across cell type family
8030462N17Rik	0	0	1	None
8030474K03Rik	0.219989	0.272761	0.507249	High across location
9030624G23Rik	0	0.0598727	0.940127	None
9130008F23Rik	0.458781	0.141431	0.399788	High across cell type family
9130019O22Rik	0.128028	0.617791	0.254181	High across location
9130023H24Rik	0.647221	0	0.352779	High across cell type family
9130401M01Rik	0.0783552	0	0.921645	None
9230112D13Rik	1.27105e-10	0.0712034	0.928797	None
9330159F19Rik	0.204922	0	0.795078	None
9430015G10Rik	0	0	1	None
9430038I01Rik	0.87172	0.0638651	0.0644149	High across cell type family
9430069I07Rik	0.290466	0	0.709534	High across cell type family
9530003J23Rik	0.827327	0	0.172673	High across cell type family
9530053A07Rik	0.100969	0.215054	0.683977	None
9530068E07Rik	0.0873854	0.72898	0.183635	High across location
9530077C05Rik	0	0	1	None
9930012K11Rik	0.958998	2.28447e-16	0.0410015	High across cell type family
9930021J03Rik	0.802899	0.168005	0.0290956	High across cell type family
9930022D16Rik	0.657437	0	0.342563	High across cell type family
9930111J21Rik1	0.15531	0.263778	0.580912	High across location
A130010J15Rik	0.349183	0	0.650817	High across cell type family
A1bg	1.38368e-09	0.0703548	0.929645	None
A1cf	0.15531	0.263778	0.580912	High across location
A2m	0.867644	0.0136843	0.118671	High across cell type family
A3galt2	0	0.315515	0.684485	High across location
A430005L14Rik	0.286827	0	0.713173	High across cell type family
A430033K04Rik	0.70387	0.0635975	0.232533	High across cell type family
A4galt	0.673003	0.0617369	0.265261	High across cell type family
A530064D06Rik	0.827327	0	0.172673	High across cell type family
A630001G21Rik	0.827327	0	0.172673	High across cell type family
A630023A22Rik	0.577444	0.126902	0.295653	High across cell type family
A630095N17Rik	1.02591e-10	0.0524427	0.947557	None
A730046J19Rik	0.622607	1.25982e-08	0.377393	High across cell type family
A830018L16Rik	0.887547	0.0935372	0.0189163	High across cell type family
A830031A19Rik	0.355086	2.13907e-09	0.644914	High across cell type family
A930003A15Rik	0.504648	0.0094731	0.485879	High across cell type family
A930009A15Rik	0.567296	0.300337	0.132367	Both to location and cell type
A930017K11Rik	3.07181e-09	0.108574	0.891426	None
A930018P22Rik	0.0741133	0.629529	0.296358	High across location
AA467197	0.736981	0.116082	0.146937	High across cell type family
AA986860	0	0	1	None
Aaas	0	0.76481	0.23519	High across location
Aacs	0.91701	0	0.08299	High across cell type family
Aadat	0	0	1	None
Aagab	0.125204	0.715555	0.159241	High across location
Aak1	0.987712	6.36821e-11	0.0122876	High across cell type family
Aamdc	0.899809	0.0229589	0.0772322	High across cell type family
Aamp	0.698177	0.222171	0.0796516	High across cell type family
Aanat	0.160022	0	0.839978	None
Aar2	0.873112	0.106712	0.020176	High across cell type family
Aard	0.0369302	0.485803	0.477267	High across location
Aars	0.965733	1.23689e-11	0.0342673	High across cell type family
Aars2	0.392536	0.360034	0.24743	Both to location and cell type
Aarsd1	0	0.14291	0.85709	None
Aasdh	0.923434	0.044626	0.03194	High across cell type family
Aasdhppt	4.13269e-15	0	1	None
Aass	0.971117	0	0.0288832	High across cell type family
Aatf	0	5.45556e-10	1	None
Aatk	0.583223	0.394474	0.0223028	Both to location and cell type
AB124611	0.530369	0.243089	0.226542	High across cell type family
Abat	0	0.144677	0.855323	None
Abca1	0.984283	6.53141e-11	0.0157166	High across cell type family
Abca12	0.57301	0	0.42699	High across cell type family
Abca13	0.438424	0	0.561576	High across cell type family
Abca17	0.264599	0	0.735401	High across cell type family
Abca2	0.726606	0.0251023	0.248292	High across cell type family
Abca3	0.542343	0.381526	0.076131	Both to location and cell type
Abca4	0.32805	0	0.67195	High across cell type family
Abca5	0.894767	0.032129	0.0731035	High across cell type family
Abca6	0.167512	0	0.832488	None
Abca7	0.0388025	0.862158	0.0990399	High across location
Abca8a	0.45819	0.323115	0.218695	Both to location and cell type
Abca8b	0.647144	0.310613	0.0422421	Both to location and cell type
Abca9	0.098781	0.859141	0.0420777	High across location
Abcb10	0.573507	0.226346	0.200146	High across cell type family
Abcb11	0.0146643	0	0.985336	None
Abcb1a	0.860128	0.0182889	0.121584	High across cell type family
Abcb1b	0.50199	0.117323	0.380687	High across cell type family
Abcb4	0.874941	0.0361432	0.088916	High across cell type family
Abcb6	0.161142	0	0.838858	None
Abcb7	0.639811	0.181415	0.178773	High across cell type family
Abcb8	0	0.0865122	0.913488	None
Abcb9	0.870074	0.00304477	0.126881	High across cell type family
Abcc1	5.15349e-09	0.0524648	0.947535	None
Abcc10	0.487064	0.29479	0.218146	Both to location and cell type
Abcc12	0	0	1	None
Abcc2	0	0	1	None
Abcc3	0.00087239	5.18753e-09	0.999128	None
Abcc4	0.940659	0	0.0593412	High across cell type family
Abcc5	0.133117	0.228759	0.638124	None
Abcc6	0.240552	0	0.759448	None
Abcc8	0.7755	6.44433e-10	0.2245	High across cell type family
Abcc9	0	0	1	None
Abcd1	0.785433	0.0972343	0.117332	High across cell type family
Abcd2	0.915645	0	0.0843552	High across cell type family
Abcd3	0.965964	0	0.0340361	High across cell type family
Abcd4	0.972772	7.18955e-11	0.0272276	High across cell type family
Abce1	0.231133	0.640249	0.128618	High across location
Abcf1	0.711341	0	0.288659	High across cell type family
Abcf2	0.413321	0	0.586679	High across cell type family
Abcf3	0.75771	0.050397	0.191893	High across cell type family
Abcg1	0.925501	0	0.074499	High across cell type family
Abcg2	0	0.0308938	0.969106	None
Abcg3	0.0146643	0	0.985336	None
Abcg4	0.840116	0	0.159884	High across cell type family
Abcg5	1.38368e-09	0.0703548	0.929645	None
Abcg8	0	0	1	None
Abhd10	0.90838	3.5144e-18	0.0916203	High across cell type family
Abhd11	0.454457	3.99177e-10	0.545543	High across cell type family
Abhd12	0.326013	0	0.673987	High across cell type family
Abhd12b	0	0	1	None
Abhd13	0.528792	0.0583064	0.412902	High across cell type family
Abhd14a	0.705118	0	0.294882	High across cell type family
Abhd14b	0.925951	0.0554818	0.0185674	High across cell type family
Abhd15	0.681221	0.0685181	0.250261	High across cell type family
Abhd16a	0.400064	0.529538	0.0703976	Both to location and cell type
Abhd17a	0.164425	0.380561	0.455015	High across location
Abhd17b	0.792389	0.0822822	0.125329	High across cell type family
Abhd17c	0.932505	0.00882037	0.0586747	High across cell type family
Abhd18	0.604572	0.372628	0.0227994	Both to location and cell type
Abhd2	0.37043	0	0.62957	High across cell type family
Abhd3	0.979703	0	0.0202973	High across cell type family
Abhd4	0.971106	0	0.0288936	High across cell type family
Abhd5	0.957661	0	0.0423388	High across cell type family
Abhd6	0.730554	0.194694	0.0747515	High across cell type family
Abhd8	0.852122	0	0.147878	High across cell type family
Abi1	0.776957	0.0376474	0.185396	High across cell type family
Abi2	0.759927	0.0427814	0.197292	High across cell type family
Abi3	0.193359	0.372553	0.434088	High across location
Abi3bp	0.121561	0	0.878439	None
Abl1	0.86723	0	0.13277	High across cell type family
Abl2	0.662461	0	0.337539	High across cell type family
Ablim1	0.363548	1.52845e-09	0.636452	High across cell type family
Ablim2	0.141277	0	0.858723	None
Ablim3	0.929374	0.0418729	0.0287531	High across cell type family
Abo	0.652901	0.238252	0.108847	High across cell type family
Abr	0.722859	0.273772	0.00336875	Both to location and cell type
Abra	0.886014	0	0.113986	High across cell type family
Abracl	0.940994	0.0170742	0.0419321	High across cell type family
Abt1	0	0	1	None
Abtb1	0.834807	0	0.165193	High across cell type family
Abtb2	0.907385	0	0.0926147	High across cell type family
Acaa1a	0.984816	0.00902993	0.00615446	High across cell type family
Acaa1b	0	0	1	None
Acaa2	0.950121	0.0209709	0.028908	High across cell type family
Acaca	0.487864	0.0191739	0.492962	High across cell type family
Acacb	0.281916	0.148502	0.569581	High across cell type family
Acad10	0.73375	0	0.26625	High across cell type family
Acad11	0.904769	0	0.0952315	High across cell type family
Acad12	0.937464	0.02739	0.0351456	High across cell type family
Acad8	0.742516	0	0.257484	High across cell type family
Acad9	0.639159	0.306758	0.0540827	Both to location and cell type
Acadl	0.98757	0	0.0124296	High across cell type family
Acadm	0.986021	2.64531e-12	0.0139792	High across cell type family
Acads	0.964837	0	0.0351628	High across cell type family
Acadsb	0.695712	0.0441646	0.260123	High across cell type family
Acadvl	0.897361	1.22053e-10	0.102639	High across cell type family
Acan	0.708076	0.1609	0.131024	High across cell type family
Acap1	0.195789	0.62354	0.180671	High across location
Acap2	0.870911	0	0.129089	High across cell type family
Acap3	0	0	1	None
Acat1	0	0.201388	0.798612	None
Acat2	0.605664	0	0.394336	High across cell type family
Acat3	0.993389	0.000953321	0.00565761	High across cell type family
Acbd3	0	0.297874	0.702126	High across location
Acbd4	0.701475	0.141993	0.156532	High across cell type family
Acbd5	0	0	1	None
Acbd6	0.221901	0.334854	0.443244	High across location
Acbd7	0.401208	0.0914213	0.507371	High across cell type family
Accs	0.950995	0.0393441	0.00966055	High across cell type family
Accsl	0	0	1	None
Acd	0.781579	0.0275503	0.190871	High across cell type family
Ace	0.919179	0.0622807	0.0185407	High across cell type family
Ace2	0.446178	0.0776097	0.476212	High across cell type family
Acer2	0.407521	0.474687	0.117792	Both to location and cell type
Acer3	0	0.331799	0.668201	High across location
Ache	0.979315	0.017708	0.00297721	High across cell type family
Acin1	0.0330433	0	0.966957	None
Ackr1	0.928447	0.0408215	0.0307315	High across cell type family
Ackr2	0.392755	0	0.607245	High across cell type family
Ackr3	0.904047	0.0100395	0.0859138	High across cell type family
Ackr4	0	0.847818	0.152182	High across location
Acly	0.174123	0.0526196	0.773257	None
Acmsd	0.196345	0	0.803655	None
Acnat1	0.575285	0	0.424715	High across cell type family
Acnat2	0.827327	0	0.172673	High across cell type family
Aco1	0.93581	0.0261213	0.038069	High across cell type family
Aco2	0.865926	0.0879105	0.0461632	High across cell type family
Acot1	0.989667	0	0.0103327	High across cell type family
Acot10	0	0.0526308	0.947369	None
Acot11	0.979219	0.00180339	0.0189781	High across cell type family
Acot12	3.8029e-10	0.425047	0.574953	High across location
Acot13	0.178796	0.0426076	0.778597	None
Acot2	0.988718	0.00569201	0.00558984	High across cell type family
Acot3	0.606078	0.250398	0.143524	Both to location and cell type
Acot4	1.24304e-10	0.381646	0.618354	High across location
Acot5	0.133475	0	0.866525	None
Acot6	0.836956	0	0.163044	High across cell type family
Acot7	0.976116	0.0155333	0.00835046	High across cell type family
Acot8	0	0	1	None
Acot9	0.917265	0.0315351	0.0512002	High across cell type family
Acox1	0.823394	0	0.176606	High across cell type family
Acox2	0.712047	0.0196396	0.268314	High across cell type family
Acox3	0.757955	0.0299676	0.212077	High across cell type family
Acoxl	0	0.058631	0.941369	None
Acp1	0.296233	0	0.703767	High across cell type family
Acp2	0.877325	0.0635586	0.0591165	High across cell type family
Acp5	0.244072	1.98958e-17	0.755928	None
Acp6	0.941026	0	0.0589736	High across cell type family
Acpp	0.827327	0	0.172673	High across cell type family
Acr	0.335592	0.00311025	0.661297	High across cell type family
Acrbp	0.259126	0.632872	0.108002	Both to location and cell type
Acrv1	0.827327	0	0.172673	High across cell type family
Acsbg1	0.989429	0.000940468	0.00963081	High across cell type family
Acsbg2	0.614265	0.164051	0.221684	High across cell type family
Acsf2	0.99696	0	0.00304044	High across cell type family
Acsf3	0	0.816135	0.183865	High across location
Acsl1	0.94594	2.75168e-18	0.0540603	High across cell type family
Acsl3	0.911469	0	0.0885311	High across cell type family
Acsl4	0.785116	0.0152902	0.199594	High across cell type family
Acsl5	0.977485	0	0.0225146	High across cell type family
Acsl6	0.941553	0	0.0584465	High across cell type family
Acsm1	0.827327	0	0.172673	High across cell type family
Acsm4	0.827327	0	0.172673	High across cell type family
Acsm5	0.614646	3.15832e-09	0.385354	High across cell type family
Acss1	0.984639	0.00738186	0.00797933	High across cell type family
Acss2	0.926702	0	0.0732977	High across cell type family
Acss3	0.669355	0.0955504	0.235095	High across cell type family
Acta1	0.847609	0	0.152391	High across cell type family
Acta2	0.240473	0	0.759527	None
Actb	0.03498	0.386195	0.578825	High across location
Actbl2	0.735278	0.0582695	0.206453	High across cell type family
Actc1	0	0.0250554	0.974945	None
Actg1	0	1.49873e-15	1	None
Actl10	0.827327	0	0.172673	High across cell type family
Actl6a	0.835731	9.32202e-18	0.164269	High across cell type family
Actl6b	0.971001	0.0110493	0.0179497	High across cell type family
Actl7b	0	0.107311	0.892689	None
Actl9	0.543128	3.76575e-10	0.456872	High across cell type family
Actn1	0.18764	0	0.81236	None
Actn2	0.451621	0.38701	0.161369	Both to location and cell type
Actn3	0.632894	0	0.367106	High across cell type family
Actn4	0.605352	0	0.394648	High across cell type family
Actr10	0.521359	0.050833	0.427808	High across cell type family
Actr1a	0	0.0235502	0.97645	None
Actr1b	0.966163	0.0208068	0.0130307	High across cell type family
Actr2	0.841839	0.0308511	0.12731	High across cell type family
Actr3	0.863181	0	0.136819	High across cell type family
Actr3b	0	0	1	None
Actr5	0	0	1	None
Actr6	0.273688	0.522049	0.204264	Both to location and cell type
Actr8	0.594986	0.109184	0.29583	High across cell type family
Actrt3	0.968445	1.48513e-10	0.0315552	High across cell type family
Acvr1	0.388478	0.122029	0.489493	High across cell type family
Acvr1b	0.96845	0.0257195	0.00583021	High across cell type family
Acvr1c	0.389194	0	0.610806	High across cell type family
Acvr2a	0.751876	0.0745801	0.173544	High across cell type family
Acvr2b	0.680652	0	0.319348	High across cell type family
Acvrl1	0.0879621	0	0.912038	None
Acy1	0.771607	0	0.228393	High across cell type family
Acy3	0.907193	0	0.0928072	High across cell type family
Acyp1	0.118475	0	0.881525	None
Acyp2	0.285123	0	0.714877	High across cell type family
Ada	0	0	1	None
Adad2	0	0.0313822	0.968618	None
Adal	0	1.11618e-10	1	None
Adam10	0.535239	0.243217	0.221543	High across cell type family
Adam11	2.19531e-06	0.450643	0.549355	High across location
Adam12	0.459717	0.00409272	0.53619	High across cell type family
Adam15	0.251998	0.738822	0.0091801	Both to location and cell type
Adam17	0.956104	0.00511274	0.0387831	High across cell type family
Adam19	0.900354	0.00750844	0.0921379	High across cell type family
Adam1a	0	0	1	None
Adam1b	0	0.267348	0.732652	High across location
Adam2	0.445027	0	0.554973	High across cell type family
Adam21	0.713629	0.138961	0.14741	High across cell type family
Adam22	0.990035	0.00744184	0.00252306	High across cell type family
Adam23	0.849655	0	0.150345	High across cell type family
Adam28	0	0	1	None
Adam3	0.657437	0	0.342563	High across cell type family
Adam30	0.615474	0	0.384526	High across cell type family
Adam32	0	5.13648e-16	1	None
Adam33	0.730412	0	0.269588	High across cell type family
Adam34	0.827327	0	0.172673	High across cell type family
Adam4	0.507781	0.438221	0.0539981	Both to location and cell type
Adam5	0.48968	0.320178	0.190142	Both to location and cell type
Adam7	0	0	1	None
Adam8	0.321084	0	0.678916	High across cell type family
Adam9	0	0	1	None
Adamts1	0.870399	0.0678479	0.061753	High across cell type family
Adamts10	0.158129	0.243178	0.598693	None
Adamts12	0.479555	0	0.520445	High across cell type family
Adamts13	0	0.0615896	0.93841	None
Adamts14	0.203632	0	0.796368	None
Adamts15	0.167799	2.12155e-10	0.832201	None
Adamts16	0.500572	0.0309287	0.4685	High across cell type family
Adamts17	0.470672	0	0.529328	High across cell type family
Adamts18	0.125206	0.530971	0.343823	High across location
Adamts19	0.423514	0.410804	0.165682	Both to location and cell type
Adamts2	0	0.189048	0.810952	None
Adamts20	0.800891	0.0204509	0.178658	High across cell type family
Adamts3	0.488005	0.3341	0.177895	Both to location and cell type
Adamts4	4.56636e-08	0.154023	0.845977	None
Adamts5	1.44586e-09	0.813343	0.186657	High across location
Adamts6	0.0416866	0.569151	0.389162	High across location
Adamts7	0.1037	0.48783	0.40847	High across location
Adamts8	0.686015	0	0.313985	High across cell type family
Adamts9	0.908829	0.0356129	0.0555582	High across cell type family
Adamtsl1	0.747607	0.0807727	0.17162	High across cell type family
Adamtsl2	0.355666	0	0.644334	High across cell type family
Adamtsl3	0	0	1	None
Adamtsl4	0	0.473929	0.526071	High across location
Adamtsl5	0.697763	0.195666	0.106571	High across cell type family
Adap1	0.928961	0.0138523	0.0571871	High across cell type family
Adap2	0.143248	0	0.856752	None
Adar	0.969645	0.00513983	0.0252147	High across cell type family
Adarb1	0.931759	0	0.0682409	High across cell type family
Adarb2	0.941076	0.029243	0.0296807	High across cell type family
Adat1	0.511772	0.392257	0.0959718	Both to location and cell type
Adat2	0	0	1	None
Adat3	0.074746	0.478128	0.447126	High across location
Adck1	0.84106	0.0091196	0.14982	High across cell type family
Adck2	7.10248e-10	0.79789	0.20211	High across location
Adck5	0.322311	0.302957	0.374733	Both to location and cell type
Adcy1	0.611266	0.339837	0.0488978	Both to location and cell type
Adcy10	0.183642	0.455274	0.361084	High across location
Adcy2	0.591198	0.196613	0.212188	High across cell type family
Adcy3	0.817854	0.0947778	0.0873687	High across cell type family
Adcy4	0.0357234	0	0.964277	None
Adcy5	0.847558	0.0929707	0.0594713	High across cell type family
Adcy6	0.495491	0.0431687	0.46134	High across cell type family
Adcy7	0.88612	0.0174352	0.0964453	High across cell type family
Adcy8	0.32679	0.55317	0.12004	Both to location and cell type
Adcy9	0.862321	0.0659315	0.0717472	High across cell type family
Adcyap1	0.53263	0.0449095	0.422461	High across cell type family
Adcyap1r1	0.936399	0.0249994	0.0386016	High across cell type family
Add1	1.2452e-10	0.743969	0.256031	High across location
Add2	0.931067	0	0.0689327	High across cell type family
Add3	0.991314	0	0.00868551	High across cell type family
Adgb	5.94221e-10	0.804909	0.195091	High across location
Adgra1	0	0	1	None
Adgra2	0	0	1	None
Adgra3	0.908205	0.0153317	0.0764637	High across cell type family
Adgrb1	0.55201	0	0.44799	High across cell type family
Adgrb2	0.849632	0.0749108	0.0754575	High across cell type family
Adgrb3	0.487472	0	0.512528	High across cell type family
Adgrd1	0.00428979	0.343784	0.651926	High across location
Adgre1	0.0808832	0.686898	0.232219	High across location
Adgre5	0.982318	0	0.0176818	High across cell type family
Adgrf2	0.252375	0.27729	0.470335	Both to location and cell type
Adgrf3	0	0.0720084	0.927992	None
Adgrf4	0	0	1	None
Adgrf5	0.0516321	0.795703	0.152664	High across location
Adgrg1	0.982647	0.0135863	0.00376668	High across cell type family
Adgrg2	0.713761	0	0.286239	High across cell type family
Adgrg3	0.227205	0	0.772795	None
Adgrg4	0.827327	0	0.172673	High across cell type family
Adgrg5	0.569715	0.334015	0.0962695	Both to location and cell type
Adgrg6	0.691532	0.0318788	0.276589	High across cell type family
Adgrl1	0.920779	0.0432226	0.0359983	High across cell type family
Adgrl2	0.810069	0	0.189931	High across cell type family
Adgrl3	0.000457645	0.789515	0.210027	High across location
Adgrl4	0	0.0909633	0.909037	None
Adgrv1	1.39018e-10	0.0741062	0.925894	None
Adh1	1.02591e-10	0.0524427	0.947557	None
Adh4	0.15781	0	0.84219	None
Adh5	0.942827	0.0487633	0.00840999	High across cell type family
Adh7	5.31572e-10	0.0331663	0.966834	None
Adhfe1	0.977944	0.0141629	0.00789346	High across cell type family
Adi1	0.173017	0.784899	0.042084	High across location
Adig	0.403223	0	0.596777	High across cell type family
Adipoq	0.213423	0	0.786577	None
Adipor1	0.818357	0.00385201	0.177791	High across cell type family
Adipor2	0.832305	0	0.167695	High across cell type family
Adk	0.96739	0	0.0326098	High across cell type family
Adm	0.471481	0	0.528519	High across cell type family
Adnp	6.2091e-09	0.139771	0.860229	None
Adnp2	0.506042	0.35265	0.141309	Both to location and cell type
Ado	0.0138042	0	0.986196	None
Adora1	0.845318	0.0627687	0.0919133	High across cell type family
Adora2a	7.77272e-11	0.646118	0.353882	High across location
Adora2b	0.980806	0	0.0191936	High across cell type family
Adora3	0.0929954	0	0.907005	None
Adpgk	0.781518	0.166099	0.0523827	High across cell type family
Adprh	0	0	1	None
Adprhl1	0.982157	0.00502801	0.0128149	High across cell type family
Adprm	0	0	1	None
Adra1a	0.664393	0	0.335607	High across cell type family
Adra1b	0	0	1	None
Adra1d	0.827327	0	0.172673	High across cell type family
Adra2a	0.81601	0.0679393	0.116051	High across cell type family
Adra2b	0	0	1	None
Adra2c	0.852612	0.0744096	0.0729786	High across cell type family
Adrb1	0.72987	0	0.27013	High across cell type family
Adrb2	0	0	1	None
Adrb3	0	0.468534	0.531466	High across location
Adrm1	0	0	1	None
Adsl	0.310329	0.25559	0.434081	Both to location and cell type
Adss	0.83833	0.0358104	0.12586	High across cell type family
Adssl1	0.967088	0	0.0329122	High across cell type family
Adtrp	0.35075	0.53359	0.11566	Both to location and cell type
Aebp1	0.812795	0	0.187205	High across cell type family
Aebp2	0.730953	0	0.269047	High across cell type family
Aen	0.604436	0	0.395564	High across cell type family
Afap1	0.125741	0	0.874259	None
Afap1l1	0.544841	0.0539416	0.401218	High across cell type family
Afap1l2	0.830137	0.106054	0.063809	High across cell type family
Aff1	0.894832	0	0.105168	High across cell type family
Aff2	0.87609	0	0.12391	High across cell type family
Aff3	0.755804	0.208172	0.0360244	High across cell type family
Aff4	0.700022	0.132072	0.167906	High across cell type family
Afg3l1	0.761815	0.12234	0.115845	High across cell type family
Afg3l2	0.821643	0	0.178357	High across cell type family
Afmid	0.479182	8.75719e-09	0.520818	High across cell type family
Afp	0.052881	0.587477	0.359642	High across location
Aftph	0.935481	0.0187636	0.0457553	High across cell type family
Aga	0.850815	0.00693827	0.142247	High across cell type family
Agap1	0.886839	0.105645	0.00751647	High across cell type family
Agap2	0.706066	0.059117	0.234817	High across cell type family
Agap3	0.929848	1.8447e-11	0.0701523	High across cell type family
Agbl1	0.113527	0	0.886473	None
Agbl2	0.536168	0	0.463832	High across cell type family
Agbl3	0.945965	0	0.0540349	High across cell type family
Agbl4	0.908161	0	0.0918386	High across cell type family
Agbl5	0	0.19758	0.80242	None
Ager	0.914712	0.0282076	0.0570799	High across cell type family
Agfg1	0.479178	0	0.520822	High across cell type family
Agfg2	0	0	1	None
Aggf1	0.496485	0.103985	0.399531	High across cell type family
Agk	0.413439	0	0.586561	High across cell type family
Agl	0.863814	6.79789e-16	0.136186	High across cell type family
Agmat	0.783751	0.165853	0.0503967	High across cell type family
Agmo	0.9631	0.0180976	0.0188021	High across cell type family
Ago1	0	0.560983	0.439017	High across location
Ago2	0.698143	0.0231126	0.278744	High across cell type family
Ago3	0.268358	0.0931875	0.638455	High across cell type family
Ago4	0.590965	0.39169	0.0173447	Both to location and cell type
Agpat1	0.500864	0.315578	0.183557	Both to location and cell type
Agpat2	0.867684	0	0.132316	High across cell type family
Agpat3	0.958519	0	0.041481	High across cell type family
Agpat4	0.601481	0	0.398519	High across cell type family
Agpat5	0.97977	0.0186461	0.00158407	High across cell type family
Agps	0.407913	0	0.592087	High across cell type family
Agr2	0.652901	0.238252	0.108847	High across cell type family
Agr3	0.673237	0	0.326763	High across cell type family
Agrn	0.750067	0.143351	0.106582	High across cell type family
Agrp	0.13193	0.684278	0.183791	High across location
Agt	0.952201	0.0147157	0.0330834	High across cell type family
Agtpbp1	0.959992	0.0305575	0.00945086	High across cell type family
Agtr1a	0.553537	0.0238933	0.42257	High across cell type family
Agtr1b	0.220455	0	0.779545	None
Agtr2	0.760756	0.00625625	0.232988	High across cell type family
Agtrap	0.867592	0.0238752	0.108533	High across cell type family
Ahctf1	0	0	1	None
Ahcy	0.704139	0	0.295861	High across cell type family
Ahcyl1	0.94355	0	0.0564496	High across cell type family
Ahcyl2	0.298103	0.163863	0.538034	High across cell type family
Ahdc1	0.366595	0.329816	0.303589	Both to location and cell type
Ahi1	0.905308	0.0340157	0.0606761	High across cell type family
Ahnak	0.861441	0	0.138559	High across cell type family
Ahnak2	0.916547	2.52121e-11	0.0834525	High across cell type family
Ahr	0.720683	0.0825397	0.196777	High across cell type family
Ahrr	0.3262	0	0.6738	High across cell type family
Ahsa1	0.518317	0	0.481683	High across cell type family
Ahsa2	0.830719	0.0235317	0.145749	High across cell type family
Ahsg	0.827327	0	0.172673	High across cell type family
AI182371	0.652901	0.238252	0.108847	High across cell type family
AI429214	0.80217	1.88681e-16	0.19783	High across cell type family
AI467606	0	0	1	None
AI593442	0.881679	0.00140303	0.116918	High across cell type family
AI597479	0.901481	0.0542434	0.0442751	High across cell type family
AI661453	0.833498	3.8918e-10	0.166502	High across cell type family
AI837181	0.559224	0.206845	0.233931	High across cell type family
AI854703	0.930994	0.0453626	0.0236432	High across cell type family
AI987944	0.942445	0.0270518	0.0305032	High across cell type family
Aida	0.402617	0	0.597383	High across cell type family
Aif1	0.308739	0.631658	0.0596028	Both to location and cell type
Aif1l	0.780424	0	0.219576	High across cell type family
Aifm1	0.613332	0	0.386668	High across cell type family
Aifm2	0.407728	0	0.592272	High across cell type family
Aifm3	0.913584	0.00374251	0.0826732	High across cell type family
Aig1	0.932482	0	0.067518	High across cell type family
Aim2	0	0	1	None
Aimp1	0.872051	0.0819605	0.0459884	High across cell type family
Aimp2	0.41509	0.0221215	0.562788	High across cell type family
Aip	0.94296	0	0.0570397	High across cell type family
Aipl1	0	0.235237	0.764763	None
Aire	0	0.174295	0.825705	None
Ajap1	0.902765	0	0.0972352	High across cell type family
Ajuba	0.914596	0	0.0854038	High across cell type family
Ak1	0	0	1	None
AK157302	0.412297	0	0.587703	High across cell type family
Ak2	0.893347	0	0.106653	High across cell type family
Ak3	0.959038	0	0.0409623	High across cell type family
Ak4	0.880107	0	0.119893	High across cell type family
Ak5	0.874425	0	0.125575	High across cell type family
Ak6	0.186068	0.19727	0.616663	None
Ak7	1.31706e-10	0.181581	0.818419	None
Ak8	0.213876	0.410613	0.375512	High across location
Ak9	0.167191	0.267128	0.565681	High across location
Akap1	0.334609	0	0.665391	High across cell type family
Akap10	0.31566	0	0.68434	High across cell type family
Akap11	0.945589	0	0.0544108	High across cell type family
Akap12	0.748763	0.156083	0.0951539	High across cell type family
Akap13	0.697134	1.94993e-17	0.302866	High across cell type family
Akap14	0.418227	0.12162	0.460153	High across cell type family
Akap17b	0.877184	0.0778254	0.0449911	High across cell type family
Akap3	0	0.355992	0.644008	High across location
Akap5	0.850584	0.0733349	0.0760812	High across cell type family
Akap6	0.978147	0.00458248	0.0172702	High across cell type family
Akap7	2.33971e-08	0.326777	0.673223	High across location
Akap8	0	0.231199	0.768801	None
Akap8l	0.768158	5.18473e-15	0.231842	High across cell type family
Akap9	0.685024	0	0.314976	High across cell type family
Akip1	0.81539	0.0415106	0.143099	High across cell type family
Akirin1	0.15763	0	0.84237	None
Akirin2	0.163441	0.375078	0.461482	High across location
Akna	0.846821	0.104946	0.0482329	High across cell type family
Aknad1	0.113527	0	0.886473	None
Akr1a1	0.887187	0.0310331	0.0817803	High across cell type family
Akr1b10	0.964549	0.0136836	0.0217674	High across cell type family
Akr1b3	0	0.585987	0.414013	High across location
Akr1b7	0	0	1	None
Akr1b8	0.596255	0	0.403745	High across cell type family
Akr1c12	0.15531	0.263778	0.580912	High across location
Akr1c13	0.861311	0.0341069	0.104582	High across cell type family
Akr1c14	0.827327	0	0.172673	High across cell type family
Akr1c18	0	0.00913826	0.990862	None
Akr1c19	0	0.308588	0.691412	High across location
Akr1c21	0.15531	0.263778	0.580912	High across location
Akr1cl	0.171771	0.000789496	0.82744	None
Akr1e1	0.914208	0	0.0857921	High across cell type family
Akr7a5	0.945567	0.00624618	0.0481868	High across cell type family
Akt1	0.850493	0	0.149507	High across cell type family
Akt1s1	0.898203	0	0.101797	High across cell type family
Akt2	0.886462	0.0523636	0.061174	High across cell type family
Akt3	0.942792	0	0.0572085	High across cell type family
Aktip	0.818472	0.129864	0.0516637	High across cell type family
Alad	0.056588	0.592599	0.350813	High across location
Alas1	0.926458	0	0.0735416	High across cell type family
Alas2	0.486256	0	0.513744	High across cell type family
Alb	0	0.308853	0.691147	High across location
Alcam	0.600684	0.0624285	0.336887	High across cell type family
Aldh16a1	0.35725	0.318182	0.324568	Both to location and cell type
Aldh18a1	0.875546	0.02332	0.101134	High across cell type family
Aldh1a1	0.886038	0.0533851	0.0605767	High across cell type family
Aldh1a2	1.37625e-09	0.289121	0.710879	High across location
Aldh1a3	0.305917	0.0701816	0.623901	High across cell type family
Aldh1a7	0.0251631	0	0.974837	None
Aldh1b1	0.865309	0.0680197	0.0666713	High across cell type family
Aldh1l1	0.996179	1.6588e-11	0.00382128	High across cell type family
Aldh1l2	0.274692	0	0.725308	High across cell type family
Aldh2	0.993012	0.00350827	0.00347943	High across cell type family
Aldh3a1	0.601601	1.84288e-10	0.398399	High across cell type family
Aldh3a2	0.79592	3.21369e-10	0.20408	High across cell type family
Aldh3b1	0.790061	0.133996	0.0759433	High across cell type family
Aldh3b2	0.488221	0.221418	0.290361	High across cell type family
Aldh3b3	0.827327	0	0.172673	High across cell type family
Aldh4a1	0.98112	0	0.0188804	High across cell type family
Aldh5a1	0.0997034	0	0.900297	None
Aldh6a1	0.971881	0	0.0281191	High across cell type family
Aldh7a1	0.972026	0	0.0279739	High across cell type family
Aldh8a1	0.531197	0.123995	0.344807	High across cell type family
Aldh9a1	0.939131	1.48792e-10	0.0608693	High across cell type family
Aldoa	0.646567	0.207224	0.146209	High across cell type family
Aldoart1	0	0.391284	0.608716	High across location
Aldoart2	0.15531	0.263778	0.580912	High across location
Aldob	0.603702	0	0.396298	High across cell type family
Aldoc	0.936225	0	0.0637752	High across cell type family
Alg1	0.93636	0	0.0636405	High across cell type family
Alg10b	0.431677	0	0.568323	High across cell type family
Alg11	0.686907	0.0778341	0.235259	High across cell type family
Alg12	0.874062	0.0279134	0.0980244	High across cell type family
Alg13	0.743336	0.164503	0.0921601	High across cell type family
Alg14	0.90811	0.0412231	0.0506667	High across cell type family
Alg2	0.896782	2.1608e-11	0.103218	High across cell type family
Alg3	0.699557	0	0.300443	High across cell type family
Alg5	0.887518	0	0.112482	High across cell type family
Alg6	0.409415	0.4992	0.0913853	Both to location and cell type
Alg8	0	0	1	None
Alg9	0.441538	0.190956	0.367506	High across cell type family
Alk	0.935969	0	0.0640315	High across cell type family
Alkbh1	0.620927	0.353867	0.0252062	Both to location and cell type
Alkbh2	0.793345	0	0.206655	High across cell type family
Alkbh3	0.90638	0.0008622	0.0927581	High across cell type family
Alkbh4	0	0	1	None
Alkbh5	0.372382	0.0953715	0.532246	High across cell type family
Alkbh6	0.898104	3.62437e-10	0.101896	High across cell type family
Alkbh7	0.460136	0	0.539864	High across cell type family
Alkbh8	0.800814	0.110304	0.0888814	High across cell type family
Allc	0.258725	0	0.741275	High across cell type family
Alms1	0.479761	0.303921	0.216318	Both to location and cell type
Alox12	0	0	1	None
Alox12b	0.00086032	0	0.99914	None
Alox12e	0.827327	0	0.172673	High across cell type family
Alox15	0.827327	0	0.172673	High across cell type family
Alox5	0	0	1	None
Alox5ap	0.376769	0.0686755	0.554556	High across cell type family
Alox8	0.777835	0	0.222165	High across cell type family
Aloxe3	0.918252	0.0270301	0.0547182	High across cell type family
Alpk1	0.971225	9.32228e-12	0.0287747	High across cell type family
Alpk2	0	0.612703	0.387297	High across location
Alpk3	0.593594	0	0.406406	High across cell type family
Alpl	0.982741	0	0.0172592	High across cell type family
Alppl2	0.15531	0.263778	0.580912	High across location
Als2	0.332659	0.608116	0.0592255	Both to location and cell type
Als2cl	0.984019	0.00199186	0.013989	High across cell type family
Alx3	0.254875	0.0362241	0.708901	High across cell type family
Alx4	0.400345	0	0.599655	High across cell type family
Alyref	0.187752	0.796208	0.0160402	High across location
Alyref2	0.160153	0	0.839847	None
Amacr	0.911592	0	0.0884081	High across cell type family
Ambra1	1.30245e-10	0.0116498	0.98835	None
Amd1	0	0.885491	0.114509	High across location
Amd2	0.875758	0	0.124242	High across cell type family
Amdhd1	0	0.535046	0.464954	High across location
Amdhd2	0	0.404546	0.595454	High across location
Amelx	0.15531	0.263778	0.580912	High across location
Amer1	0.74671	0	0.25329	High across cell type family
Amer2	0.696988	0.294456	0.00855674	Both to location and cell type
Amer3	0.954397	0	0.0456027	High across cell type family
Amfr	0.943354	0	0.0566465	High across cell type family
Amh	0.325976	0	0.674024	High across cell type family
Amhr2	0.8136	0.0978318	0.0885682	High across cell type family
Amigo1	0.970374	4.17128e-12	0.0296261	High across cell type family
Amigo2	1.02073e-07	0.38567	0.61433	High across location
Amigo3	0.769169	0.00440908	0.226422	High across cell type family
Ammecr1	7.16573e-08	0.296823	0.703177	High across location
Ammecr1l	0.891274	0.0699187	0.0388073	High across cell type family
Amn	0.971075	0.0190025	0.00992198	High across cell type family
Amn1	0.625783	0.107042	0.267175	High across cell type family
Amot	0.895816	0	0.104184	High across cell type family
Amotl1	0.134145	9.22592e-20	0.865855	None
Amotl2	0.566673	0	0.433327	High across cell type family
Ampd1	3.25882e-10	0.236416	0.763584	None
Ampd2	0.667166	0.176888	0.155946	High across cell type family
Ampd3	0.909109	0.0393448	0.051546	High across cell type family
Amph	0.948803	0.0409986	0.010198	High across cell type family
Amt	0.950219	0	0.0497807	High across cell type family
Amtn	0.827327	0	0.172673	High across cell type family
Amy1	0.808721	0.0801348	0.111144	High across cell type family
Amz1	0.383657	0.388762	0.227582	Both to location and cell type
Amz2	0.512301	0	0.487699	High across cell type family
Anapc1	0.112681	0	0.887319	None
Anapc10	0.761629	0.0731547	0.165216	High across cell type family
Anapc11	1.38618e-10	0.19823	0.80177	None
Anapc13	0.146889	0.416294	0.436816	High across location
Anapc15	0.551059	0.401827	0.0471142	Both to location and cell type
Anapc16	0.790033	0	0.209967	High across cell type family
Anapc2	0.259022	8.44328e-11	0.740978	High across cell type family
Anapc4	0.691152	0.258572	0.0502759	Both to location and cell type
Anapc5	0.848684	1.47777e-10	0.151316	High across cell type family
Anapc7	2.56724e-09	0.384974	0.615026	High across location
Ang	0.17339	0.169446	0.657164	None
Ang4	0.189232	0	0.810768	None
Angel1	0.702226	0	0.297774	High across cell type family
Angel2	0.246738	0.389329	0.363932	High across location
Angpt1	0.951234	4.86209e-11	0.0487664	High across cell type family
Angpt2	0.729741	0	0.270259	High across cell type family
Angpt4	0	0	1	None
Angptl1	0.0522402	0.732241	0.215519	High across location
Angptl2	0.778759	0.131939	0.0893022	High across cell type family
Angptl3	0.784929	0.0335262	0.181545	High across cell type family
Angptl4	0.983102	0.00627901	0.0106195	High across cell type family
Angptl6	2.02454e-09	0.18014	0.81986	None
Angptl7	0	0.237963	0.762037	None
Angptl8	0.657437	0	0.342563	High across cell type family
Ank	0.876023	0.00299131	0.120986	High across cell type family
Ank1	0.919246	0	0.0807538	High across cell type family
Ank2	0.754362	0.130376	0.115261	High across cell type family
Ank3	0.991398	0	0.0086019	High across cell type family
Ankdd1a	0.827327	0	0.172673	High across cell type family
Ankdd1b	0.327959	0	0.672041	High across cell type family
Ankef1	0.892891	0.0479673	0.0591421	High across cell type family
Ankfn1	0	0.881268	0.118732	High across location
Ankfy1	0.938751	0	0.0612488	High across cell type family
Ankhd1	0.0211408	0.787025	0.191834	High across location
Ankib1	0	0	1	None
Ankk1	0.827327	0	0.172673	High across cell type family
Ankle1	0.26053	0	0.73947	High across cell type family
Ankle2	0.909136	4.84329e-10	0.090864	High across cell type family
Ankmy2	0.730372	0	0.269628	High across cell type family
Ankra2	0	0.0616791	0.938321	None
Ankrd1	0.513047	0.120004	0.36695	High across cell type family
Ankrd10	0.165943	0.408535	0.425522	High across location
Ankrd11	0.206849	0.353355	0.439796	High across location
Ankrd12	0.642812	0.0477153	0.309473	High across cell type family
Ankrd13a	0.281342	0.000210004	0.718448	High across cell type family
Ankrd13b	0.753698	0	0.246302	High across cell type family
Ankrd13c	0.0150611	0	0.984939	None
Ankrd13d	0.916776	0.0172397	0.0659839	High across cell type family
Ankrd16	0.769876	0.0273952	0.202729	High across cell type family
Ankrd17	0.813503	0.130197	0.0563003	High across cell type family
Ankrd2	0	0	1	None
Ankrd22	0	0.210859	0.789141	None
Ankrd23	0.516103	0.0338306	0.450066	High across cell type family
Ankrd24	0.927009	0.055335	0.0176562	High across cell type family
Ankrd26	0.646207	0.097162	0.256631	High across cell type family
Ankrd27	0.710554	0.167604	0.121841	High across cell type family
Ankrd28	0.17156	0.720014	0.108427	High across location
Ankrd29	0.816848	0	0.183152	High across cell type family
Ankrd31	0.184653	0	0.815347	None
Ankrd33	0.0342781	1.30357e-09	0.965722	None
Ankrd33b	0.374961	0.409442	0.215597	Both to location and cell type
Ankrd34a	0.946099	0.00288122	0.0510199	High across cell type family
Ankrd34b	0.973035	0	0.0269651	High across cell type family
Ankrd34c	0.694768	0	0.305232	High across cell type family
Ankrd35	0.731502	0.0664416	0.202056	High across cell type family
Ankrd37	0.916509	0.0391282	0.0443631	High across cell type family
Ankrd39	0	0.276908	0.723092	High across location
Ankrd40	0.934648	0	0.0653515	High across cell type family
Ankrd42	0.857028	0.0394451	0.103527	High across cell type family
Ankrd44	0.762332	0.0806485	0.157019	High across cell type family
Ankrd45	0.687521	0.241997	0.0704822	High across cell type family
Ankrd46	0.884042	0	0.115958	High across cell type family
Ankrd49	0.757255	0.0636877	0.179057	High across cell type family
Ankrd50	0.935126	1.7324e-10	0.0648741	High across cell type family
Ankrd52	0	0	1	None
Ankrd54	0.842639	6.91791e-11	0.157361	High across cell type family
Ankrd55	0.888216	0	0.111784	High across cell type family
Ankrd6	0.716691	9.02374e-11	0.283309	High across cell type family
Ankrd61	0.0439788	0.615669	0.340353	High across location
Ankrd63	0.0985341	0.653591	0.247875	High across location
Ankrd65	0.0146643	0	0.985336	None
Ankrd66	0.985719	0	0.014281	High across cell type family
Ankrd7	9.23945e-09	0.0570023	0.942998	None
Ankrd9	0.580171	0	0.419829	High across cell type family
Anks1	0.87519	0	0.12481	High across cell type family
Anks1b	0.946251	7.71156e-12	0.0537489	High across cell type family
Anks3	0	0	1	None
Anks4b	0.0149481	0	0.985052	None
Anks6	0.109739	0.206948	0.683313	None
Ankub1	0.055911	0.864778	0.0793106	High across location
Ankzf1	0	0	1	None
Anln	0	0	1	None
Ano1	0.580578	0.136409	0.283013	High across cell type family
Ano10	0.880881	6.24436e-11	0.119119	High across cell type family
Ano2	0.298112	0	0.701888	High across cell type family
Ano3	0.592946	0.32902	0.0780345	Both to location and cell type
Ano4	0.726843	0.152418	0.120739	High across cell type family
Ano5	0.699346	0.261642	0.0390121	Both to location and cell type
Ano6	0.676641	0	0.323359	High across cell type family
Ano7	0.440688	7.19727e-10	0.559312	High across cell type family
Ano8	0.757572	0.195199	0.0472287	High across cell type family
Anp32a	0.375324	0.455039	0.169637	Both to location and cell type
Anp32b	0.265244	0.638492	0.0962638	Both to location and cell type
Anp32e	0	0	1	None
Anpep	0	0	1	None
Antxr1	0.959248	1.68712e-11	0.0407517	High across cell type family
Antxr2	0.885346	0	0.114654	High across cell type family
Anxa1	0	0.444941	0.555059	High across location
Anxa10	0.283783	0.303236	0.41298	Both to location and cell type
Anxa11	0.23611	0.276099	0.487791	High across location
Anxa2	0.826499	0.0380906	0.13541	High across cell type family
Anxa3	0.635885	0.300154	0.0639616	Both to location and cell type
Anxa4	0.62777	0	0.37223	High across cell type family
Anxa5	0.889339	0	0.110661	High across cell type family
Anxa6	0.927471	0	0.0725288	High across cell type family
Anxa7	0	0	1	None
Anxa8	0.673237	0	0.326763	High across cell type family
Anxa9	0	0	1	None
Aoah	0	0.235506	0.764494	None
Aoc1	0	0.0854782	0.914522	None
Aoc2	0.443554	0.0591143	0.497332	High across cell type family
Aoc3	0.163836	0.765795	0.0703686	High across location
Aox1	0.989319	0.0021975	0.00848365	High across cell type family
Aox2	0.119485	0.755685	0.12483	High across location
Aox3	0.2793	0	0.7207	High across cell type family
Aox4	0.766099	0.052865	0.181036	High across cell type family
Ap1ar	0.959068	0.00599791	0.0349346	High across cell type family
Ap1b1	0.885832	0.0105036	0.103665	High across cell type family
Ap1g1	0.357032	0.023357	0.619611	High across cell type family
Ap1g2	0.738817	0.148353	0.11283	High across cell type family
Ap1m1	0.519607	0.206128	0.274265	High across cell type family
Ap1m2	0.287146	8.48443e-17	0.712854	High across cell type family
Ap1s1	0.72436	0.190965	0.0846751	High across cell type family
Ap1s2	0.962272	0.00279601	0.0349324	High across cell type family
Ap1s3	0.783878	0.0533091	0.162813	High across cell type family
Ap2a1	0.961138	0	0.0388623	High across cell type family
Ap2a2	0.930134	0.0280845	0.0417811	High across cell type family
Ap2b1	0.938447	0.0233401	0.0382125	High across cell type family
Ap2m1	0.779474	0	0.220526	High across cell type family
Ap2s1	0.729933	0.152631	0.117436	High across cell type family
Ap3b1	0	1.41597e-16	1	None
Ap3b2	0.934648	0.0477574	0.0175941	High across cell type family
Ap3d1	0.701833	0.246901	0.0512663	High across cell type family
Ap3m1	0.904566	0	0.0954343	High across cell type family
Ap3m2	0.934785	0.0273148	0.0379	High across cell type family
Ap3s1	0.344529	0.50584	0.149632	Both to location and cell type
Ap3s2	0.729705	0.00179378	0.268501	High across cell type family
Ap4b1	0.863777	0	0.136223	High across cell type family
Ap4e1	0	0.642126	0.357874	High across location
Ap4m1	0.364707	0.0595356	0.575757	High across cell type family
Ap4s1	0.445126	0.473669	0.0812047	Both to location and cell type
Ap5b1	0.0761736	0.205904	0.717922	None
Ap5m1	0.268997	0.140158	0.590845	High across cell type family
Ap5s1	0.417139	0.255622	0.327238	Both to location and cell type
Ap5z1	0.823618	0.0849492	0.0914326	High across cell type family
Apaf1	0.895628	0.0832025	0.0211697	High across cell type family
Apba1	0.901195	0.0609872	0.0378178	High across cell type family
Apba2	0	0	1	None
Apba3	0.957131	0.0216045	0.0212649	High across cell type family
Apbb1	0.929051	0.0569888	0.0139602	High across cell type family
Apbb1ip	0	0	1	None
Apbb2	0.528807	0.289989	0.181204	Both to location and cell type
Apc	0	0	1	None
Apc2	0.522131	0.407286	0.070583	Both to location and cell type
Apcdd1	0.362264	0	0.637736	High across cell type family
Apeh	0.153644	0.474901	0.371455	High across location
Apela	0	0.0268182	0.973182	None
Apex1	0	0.246657	0.753343	None
Apex2	0	0.254542	0.745458	High across location
Aph1a	0.77154	0.177252	0.0512084	High across cell type family
Aph1b	0.800065	0	0.199935	High across cell type family
Aph1c	0.842402	0.0834149	0.0741835	High across cell type family
Api5	0.109306	0.200098	0.690596	None
Apip	0.644359	0.233336	0.122305	High across cell type family
Aplf	0.398589	0.137687	0.463724	High across cell type family
Apln	0.988959	0	0.0110413	High across cell type family
Aplnr	0.77068	0	0.22932	High across cell type family
Aplp1	0.123302	0.848956	0.0277421	High across location
Aplp2	0.618457	0	0.381543	High across cell type family
Apmap	0	0.7195	0.2805	High across location
Apoa1	0.821605	0	0.178395	High across cell type family
Apoa2	0	0	1	None
Apoa4	0	0.333368	0.666632	High across location
Apoa5	0.827327	0	0.172673	High across cell type family
Apobec1	0.979421	3.27334e-12	0.0205792	High across cell type family
Apobec2	4.00664e-10	0.170822	0.829178	None
Apobec3	0.986963	0.00162488	0.0114122	High across cell type family
Apobr	0.910377	3.07711e-10	0.0896228	High across cell type family
Apoc1	0.971743	0.00533765	0.0229196	High across cell type family
Apoc3	0.544116	0.0701595	0.385724	High across cell type family
Apoc4	0.652221	0.0376504	0.310128	High across cell type family
Apod	0.485304	0	0.514696	High across cell type family
Apoe	0.997976	0	0.00202419	High across cell type family
Apof	0.0771426	0.496314	0.426544	High across location
Apoh	0.302938	0.423751	0.273311	Both to location and cell type
Apol11b	0.827327	0	0.172673	High across cell type family
Apol6	0	0.197475	0.802525	None
Apol7a	0.260861	0.284495	0.454644	Both to location and cell type
Apol8	0.919201	0.0140581	0.0667409	High across cell type family
Apol9a	0	0.170957	0.829043	None
Apol9b	0	0.474164	0.525836	High across location
Apold1	0.188272	0.0291801	0.782548	None
Apom	0.442861	0	0.557139	High across cell type family
Apon	0.113527	0	0.886473	None
Apoo	0	0.459028	0.540972	High across location
Apool	0.891402	0.0213973	0.0872009	High across cell type family
App	0.957269	0.0334332	0.00929825	High across cell type family
Appbp2	0.854043	0	0.145957	High across cell type family
Appl1	0.938686	0.0232519	0.0380623	High across cell type family
Appl2	0.968285	0	0.0317152	High across cell type family
Aprt	0.442451	0.350362	0.207187	Both to location and cell type
Aptx	0.233736	0.428954	0.33731	High across location
Aqp1	0.584852	0.0880323	0.327115	High across cell type family
Aqp11	0.301753	0.246168	0.452079	High across cell type family
Aqp12	0.827327	0	0.172673	High across cell type family
Aqp2	0.745545	0	0.254455	High across cell type family
Aqp3	0.0658816	0.785809	0.14831	High across location
Aqp4	0.987196	0.00401813	0.00878598	High across cell type family
Aqp5	0.117229	0	0.882771	None
Aqp6	0.0352565	0.782725	0.182019	High across location
Aqp7	0.0551601	4.1576e-15	0.94484	None
Aqp8	0	0.333368	0.666632	High across location
Aqp9	0.998887	5.05399e-05	0.00106293	High across cell type family
Aqr	0.556009	0.34592	0.0980711	Both to location and cell type
Ar	0.215994	0	0.784006	None
Araf	0.981916	0	0.0180837	High across cell type family
Arap1	0.942692	0.00632144	0.0509863	High across cell type family
Arap2	0.927992	0	0.0720084	High across cell type family
Arap3	0	0	1	None
Arc	0.682484	0.264215	0.0533002	Both to location and cell type
Arcn1	0.230799	3.07063e-09	0.769201	None
Areg	0.620803	0	0.379197	High across cell type family
Arel1	0.533743	0	0.466257	High across cell type family
Arf1	0.962164	0.00419321	0.0336424	High across cell type family
Arf2	0.387292	0.498045	0.114663	Both to location and cell type
Arf3	0.962967	0.0108692	0.0261638	High across cell type family
Arf4	0.553214	0.135989	0.310797	High across cell type family
Arf5	0	0	1	None
Arf6	0.38914	0.313206	0.297654	Both to location and cell type
Arfgap1	0.974054	0.00224403	0.0237023	High across cell type family
Arfgap2	0.836504	0	0.163496	High across cell type family
Arfgap3	0.455855	0	0.544145	High across cell type family
Arfgef1	0.879987	0	0.120013	High across cell type family
Arfgef2	0.920105	0.0604952	0.0193993	High across cell type family
Arfgef3	0.975734	0	0.0242656	High across cell type family
Arfip1	0.894919	5.58236e-11	0.105081	High across cell type family
Arfip2	0.625689	0	0.374311	High across cell type family
Arfrp1	2.00708e-09	0.468107	0.531893	High across location
Arg1	0.457386	0.00806526	0.534549	High across cell type family
Arg2	0.627987	0.146983	0.22503	High across cell type family
Arglu1	0	0.356387	0.643613	High across location
Arhgap1	0	0.0318936	0.968106	None
Arhgap10	7.74173e-11	0.540513	0.459487	High across location
Arhgap11a	0	0	1	None
Arhgap12	0	0	1	None
Arhgap15	0.596762	0.0858751	0.317362	High across cell type family
Arhgap17	0.891086	0	0.108914	High across cell type family
Arhgap18	0.921077	0.0654849	0.0134384	High across cell type family
Arhgap19	0.111727	0	0.888273	None
Arhgap20	0.923265	0	0.076735	High across cell type family
Arhgap21	0.790747	0.118664	0.0905894	High across cell type family
Arhgap22	0.869567	0.0533596	0.0770734	High across cell type family
Arhgap23	0.145259	0	0.854741	None
Arhgap24	0.651396	0	0.348604	High across cell type family
Arhgap25	0.0319514	0.226732	0.741317	None
Arhgap26	0.841563	0.0333632	0.125073	High across cell type family
Arhgap27	0.895447	2.61761e-16	0.104553	High across cell type family
Arhgap28	0.0817119	0	0.918288	None
Arhgap29	0	0	1	None
Arhgap30	0.527326	0	0.472674	High across cell type family
Arhgap31	0.840018	0.0480465	0.111935	High across cell type family
Arhgap32	0.90558	0	0.0944196	High across cell type family
Arhgap33	0.641186	0.169266	0.189548	High across cell type family
Arhgap33os	5.55655e-09	0.267074	0.732926	High across location
Arhgap35	0.709198	0	0.290802	High across cell type family
Arhgap36	0.458942	0.271032	0.270026	Both to location and cell type
Arhgap39	0.344392	0	0.655608	High across cell type family
Arhgap4	0.559157	0.20172	0.239123	High across cell type family
Arhgap40	1.43941e-10	0.0478456	0.952154	None
Arhgap42	0.848172	0.0111842	0.140644	High across cell type family
Arhgap44	0.938998	0.0132648	0.0477372	High across cell type family
Arhgap5	0.985856	0.00904111	0.00510279	High across cell type family
Arhgap6	0.772255	0	0.227745	High across cell type family
Arhgap8	0	0.176253	0.823747	None
Arhgap9	0	0.623094	0.376906	High across location
Arhgdia	0	0.152307	0.847693	None
Arhgdib	1.20126e-10	0.508383	0.491617	High across location
Arhgdig	0.901219	0.0828144	0.015967	High across cell type family
Arhgef1	0.942103	0	0.0578969	High across cell type family
Arhgef10	0.914368	0.00918277	0.0764495	High across cell type family
Arhgef10l	0.867841	0.113917	0.018242	High across cell type family
Arhgef11	0.351599	0.46568	0.182721	Both to location and cell type
Arhgef12	0.862279	0	0.137721	High across cell type family
Arhgef15	0.94648	2.62011e-11	0.05352	High across cell type family
Arhgef16	1.19914e-09	0.0105308	0.989469	None
Arhgef17	0.909755	3.06321e-11	0.0902455	High across cell type family
Arhgef18	0.0227977	0.437851	0.539351	High across location
Arhgef19	0.955456	0.0152635	0.0292809	High across cell type family
Arhgef2	0.131218	0	0.868782	None
Arhgef25	0.929344	0.0427139	0.0279422	High across cell type family
Arhgef26	0.923832	4.17312e-09	0.076168	High across cell type family
Arhgef28	0.562015	0	0.437985	High across cell type family
Arhgef3	0.920318	0.0393129	0.0403688	High across cell type family
Arhgef33	0.353287	0.132119	0.514594	High across cell type family
Arhgef37	0.0400772	0.654742	0.305181	High across location
Arhgef38	0	0	1	None
Arhgef39	0	0	1	None
Arhgef4	0.231807	0.270391	0.497802	High across location
Arhgef40	0.955252	0	0.044748	High across cell type family
Arhgef5	0.787551	0.115106	0.0973436	High across cell type family
Arhgef6	0.659046	0.0560747	0.284879	High across cell type family
Arhgef7	0.78289	0.190158	0.0269524	High across cell type family
Arhgef9	0.869292	0.000611623	0.130097	High across cell type family
Arid1a	5.55918e-10	0	1	None
Arid1b	0.812851	0	0.187149	High across cell type family
Arid2	0.583159	0.110512	0.306329	High across cell type family
Arid3a	0.872432	0.0448973	0.0826709	High across cell type family
Arid3b	0	0	1	None
Arid3c	0	0.068787	0.931213	None
Arid4a	0.607995	0	0.392005	High across cell type family
Arid4b	0.939777	0.0479871	0.0122361	High across cell type family
Arid5a	0.881916	0	0.118084	High across cell type family
Arid5b	0.0686055	0.0297804	0.901614	None
Arih1	0.285577	0.131722	0.582702	High across cell type family
Arih2	0	0	1	None
Arl1	0.592314	1.39076e-08	0.407686	High across cell type family
Arl10	0.474426	0.433957	0.0916173	Both to location and cell type
Arl11	0.019534	9.60068e-09	0.980466	None
Arl13b	0.81956	0	0.18044	High across cell type family
Arl14ep	0.0537151	0.449865	0.496419	High across location
Arl15	0.111016	0.327646	0.561339	High across location
Arl16	0.688682	0.136722	0.174597	High across cell type family
Arl2	0.600798	1.28467e-10	0.399202	High across cell type family
Arl2bp	0.386923	0.355747	0.25733	Both to location and cell type
Arl3	0	0.128728	0.871272	None
Arl4a	0.686905	0	0.313095	High across cell type family
Arl4c	0.836258	0.00749312	0.156249	High across cell type family
Arl4d	0.838542	0	0.161458	High across cell type family
Arl5a	0.759595	0	0.240405	High across cell type family
Arl5b	0	0	1	None
Arl5c	0	0.262843	0.737157	High across location
Arl6	0.164338	0	0.835662	None
Arl6ip1	4.41466e-09	0.343955	0.656045	High across location
Arl6ip4	0.856847	0	0.143153	High across cell type family
Arl6ip5	0	0.0514915	0.948509	None
Arl6ip6	0.926169	0.00543196	0.0683992	High across cell type family
Arl8a	0.607498	0.0649598	0.327542	High across cell type family
Arl8b	0.636754	0	0.363246	High across cell type family
Arl9	0.870357	0.0391881	0.0904548	High across cell type family
Armc1	0.75697	0	0.24303	High across cell type family
Armc10	0.930487	0.0294211	0.0400917	High across cell type family
Armc2	0.0638999	0.903093	0.033007	High across location
Armc3	0.701871	0.239307	0.0588218	High across cell type family
Armc5	0.872518	0.0743673	0.0531147	High across cell type family
Armc6	0	0.751157	0.248843	High across location
Armc7	0.0978683	0	0.902132	None
Armc8	0.703309	0	0.296691	High across cell type family
Armc9	0.542628	0	0.457372	High across cell type family
Armcx1	0.960895	0.0283995	0.0107052	High across cell type family
Armcx2	0.796347	0.166167	0.0374855	High across cell type family
Armcx3	0.598785	0.231619	0.169596	High across cell type family
Armcx4	0.872995	0.043273	0.0837324	High across cell type family
Armcx5	0.86447	6.42091e-10	0.13553	High across cell type family
Armcx6	0	0	1	None
Armt1	0.228723	0.630873	0.140404	High across location
Arnt	0.967474	0.00100274	0.0315232	High across cell type family
Arnt2	2.41785e-09	0.228012	0.771988	None
Arntl	0.940276	0	0.059724	High across cell type family
Arntl2	0	0	1	None
Arpc1a	0.862349	0.121244	0.0164061	High across cell type family
Arpc1b	0.759321	0	0.240679	High across cell type family
Arpc2	0.584602	0.265684	0.149714	Both to location and cell type
Arpc3	0.0564296	0.668859	0.274711	High across location
Arpc4	0	0	1	None
Arpc5	0.0640747	0.598204	0.337722	High across location
Arpc5l	0.745603	0.105945	0.148452	High across cell type family
Arpin	0.580601	0.13993	0.279468	High across cell type family
Arpp19	0	0.407593	0.592407	High across location
Arpp21	0	0.233613	0.766387	None
Arr3	0.28233	0	0.71767	High across cell type family
Arrb1	0.691166	0.0397198	0.269114	High across cell type family
Arrb2	0.968135	0	0.0318654	High across cell type family
Arrdc1	0.860683	0	0.139317	High across cell type family
Arrdc2	0.853829	0	0.146171	High across cell type family
Arrdc3	5.31172e-11	0.837946	0.162054	High across location
Arrdc4	0.612154	0.135692	0.252154	High across cell type family
Arsa	0.710307	0.185588	0.104105	High across cell type family
Arsb	0.726593	3.00316e-16	0.273407	High across cell type family
Arsg	0.512514	0.354213	0.133273	Both to location and cell type
Arsi	0.660754	0	0.339246	High across cell type family
Arsj	0.728753	0	0.271247	High across cell type family
Arsk	0.985188	0.00459398	0.0102178	High across cell type family
Art1	0.517764	0	0.482236	High across cell type family
Art3	0.788985	0.068331	0.142684	High across cell type family
Art4	0.389757	0.0708228	0.53942	High across cell type family
Art5	0.290466	0	0.709534	High across cell type family
Artn	0.907007	0	0.0929928	High across cell type family
Arv1	0.210708	0.308903	0.480389	High across location
Arvcf	0.110618	0.623246	0.266136	High across location
Arx	0.107748	0.745439	0.146813	High across location
Arxes1	0.647525	0.0117344	0.34074	High across cell type family
Arxes2	0.920749	0.0535694	0.0256816	High across cell type family
As3mt	0.776441	0	0.223559	High across cell type family
Asah1	0.976684	0.0138619	0.00945437	High across cell type family
Asah2	0.639626	0.0651337	0.29524	High across cell type family
Asap1	0.230792	0	0.769208	None
Asap2	0.680497	0.133664	0.185839	High across cell type family
Asap3	0.73498	0.11377	0.15125	High across cell type family
Asb1	0.716232	0.0829504	0.200818	High across cell type family
Asb10	0.00765629	0	0.992344	None
Asb11	7.53301e-11	0.831107	0.168893	High across location
Asb12	0.136487	0.537055	0.326458	High across location
Asb13	0.81059	0	0.18941	High across cell type family
Asb14	0.0146641	0	0.985336	None
Asb15	0.836995	0	0.163005	High across cell type family
Asb16	0.904125	0	0.0958752	High across cell type family
Asb18	0.693539	0.0277415	0.27872	High across cell type family
Asb2	0.622599	0.205229	0.172172	High across cell type family
Asb3	2.27187e-10	0.793516	0.206484	High across location
Asb4	0.297546	0.287529	0.414925	Both to location and cell type
Asb5	0.205403	0.684006	0.11059	High across location
Asb6	0.93597	0.0321918	0.0318386	High across cell type family
Asb7	0.846381	0	0.153619	High across cell type family
Asb8	0.775121	0.153456	0.0714224	High across cell type family
Asb9	0	0.293578	0.706422	High across location
Ascc1	0.761582	0	0.238418	High across cell type family
Ascc2	0.280863	0	0.719137	High across cell type family
Ascc3	0	0.870195	0.129805	High across location
Ascl1	0.216237	0.210076	0.573687	None
Ascl2	0	0.0807793	0.919221	None
Ascl3	0.511086	0.0103215	0.478593	High across cell type family
Ascl4	0	0	1	None
Asf1a	0.972542	0.00558444	0.0218733	High across cell type family
Asf1b	0	0	1	None
Asgr1	0.117957	0.139465	0.742578	None
Asgr2	0.15531	0.263778	0.580912	High across location
Ash1l	0	0	1	None
Ash2l	0.115584	0.31337	0.571046	High across location
Asic1	0.436461	0.274175	0.289364	Both to location and cell type
Asic2	0.814588	0	0.185412	High across cell type family
Asic3	0.284686	0.57715	0.138164	Both to location and cell type
Asic4	0.830159	0.0860674	0.0837731	High across cell type family
Asic5	0.827327	0	0.172673	High across cell type family
Asl	2.62519e-11	0.939051	0.0609489	High across location
Asns	0.977392	0.00821805	0.0143904	High across cell type family
Asnsd1	0	0	1	None
Aspa	0.774695	0.100206	0.125098	High across cell type family
Aspdh	0.912843	0	0.0871567	High across cell type family
Aspg	0.948756	0	0.0512438	High across cell type family
Asph	2.56902e-10	0.826433	0.173567	High across location
Asphd1	0.988568	0.0101617	0.0012708	High across cell type family
Asphd2	0.0761895	0.287476	0.636335	High across location
Aspm	0.244851	0	0.755149	None
Aspn	0.273693	0.582979	0.143329	Both to location and cell type
Asprv1	0	0	1	None
Aspscr1	0.751109	0	0.248891	High across cell type family
Asrgl1	0.98577	0.0133424	0.000887894	High across cell type family
Ass1	0.573747	0.274343	0.15191	Both to location and cell type
Aste1	1.18615e-08	0.128285	0.871715	None
Astn1	0	0	1	None
Astn2	0.175561	0.529826	0.294613	High across location
Asxl1	0.761726	0.141261	0.0970128	High across cell type family
Asxl2	0.610075	0	0.389925	High across cell type family
Asxl3	0.93908	6.58181e-11	0.0609201	High across cell type family
Atad1	0	0.434626	0.565374	High across location
Atad2	0.550689	0.221641	0.227669	High across cell type family
Atad2b	0.853109	0.0902738	0.0566171	High across cell type family
Atad3a	0.759304	0.0915799	0.149116	High across cell type family
Atad5	0.175124	0.611533	0.213343	High across location
Atat1	0	0.815043	0.184957	High across location
Atcay	0.98122	0	0.0187802	High across cell type family
Ate1	0.876226	0.0838742	0.0398999	High across cell type family
Atf1	0.93412	0	0.0658798	High across cell type family
Atf2	0.82241	3.86806e-11	0.17759	High across cell type family
Atf3	0.239563	0.138298	0.622139	None
Atf4	0	0.286594	0.713406	High across location
Atf5	0.216923	0.021235	0.761842	None
Atf6	0	0	1	None
Atf6b	0.673363	0.207383	0.119254	High across cell type family
Atf7	0.902241	0	0.097759	High across cell type family
Atf7ip	0.0416338	0.750127	0.208239	High across location
Atg10	0.937533	0	0.0624674	High across cell type family
Atg101	0.0461919	9.29967e-10	0.953808	None
Atg12	0.619329	0.226417	0.154254	High across cell type family
Atg13	0.812993	0.032436	0.154571	High across cell type family
Atg14	0.281155	0	0.718845	High across cell type family
Atg16l1	0.559812	6.44326e-10	0.440188	High across cell type family
Atg16l2	6.0277e-08	0.147659	0.852341	None
Atg2a	0.0727068	0.0275999	0.899693	None
Atg2b	0.793301	0	0.206699	High across cell type family
Atg3	0.0518339	0.35943	0.588736	High across location
Atg4a	0.946227	0	0.0537731	High across cell type family
Atg4a-ps	1.02591e-10	0.0524427	0.947557	None
Atg4b	0.675756	0.0603704	0.263874	High across cell type family
Atg4c	0.772249	0.163889	0.0638617	High across cell type family
Atg4d	0.796576	0	0.203424	High across cell type family
Atg5	0.302026	0.585505	0.112469	Both to location and cell type
Atg7	0.693542	0.0538812	0.252577	High across cell type family
Atg9a	7.78762e-10	0.532348	0.467652	High across location
Atg9b	0.96736	0.0113832	0.0212567	High across cell type family
Atic	0.668971	0.123878	0.20715	High across cell type family
Atl1	0.957011	0.0177567	0.0252324	High across cell type family
Atl2	0.693049	0.106025	0.200926	High across cell type family
Atl3	0.481204	0	0.518796	High across cell type family
Atm	0.486913	0.267263	0.245825	Both to location and cell type
Atmin	0.915521	0.000377792	0.0841014	High across cell type family
Atoh7	0.0963829	0.0136863	0.889931	None
Atoh8	0.956324	0.00341676	0.0402597	High across cell type family
Atox1	0.18052	0.76261	0.0568707	High across location
Atp10a	0.185158	0.753847	0.060995	High across location
Atp10b	0	0	1	None
Atp11a	0.571765	0.300672	0.127563	Both to location and cell type
Atp11b	0.669942	0.0863258	0.243732	High across cell type family
Atp11c	0.238208	0	0.761792	None
Atp12a	0.0386355	0	0.961364	None
Atp13a1	0.703237	0	0.296763	High across cell type family
Atp13a2	0.844169	0.099389	0.0564423	High across cell type family
Atp13a3	0.60666	0.30922	0.0841191	Both to location and cell type
Atp13a4	0.988851	0.00759311	0.00355556	High across cell type family
Atp13a5	0.992411	6.90348e-06	0.0075819	High across cell type family
Atp1a1	1.5166e-10	0.237579	0.762421	None
Atp1a2	0.994827	0.00295888	0.00221412	High across cell type family
Atp1a3	0.988816	0	0.0111835	High across cell type family
Atp1a4	0	0	1	None
Atp1b1	0.951187	0	0.0488134	High across cell type family
Atp1b2	0.980947	0.0124933	0.00655989	High across cell type family
Atp1b3	0.12832	0	0.87168	None
Atp2a1	3.26039e-20	0	1	None
Atp2a2	1.12903e-09	0.261486	0.738514	High across location
Atp2a3	0.00199039	0.178228	0.819782	None
Atp2b1	0.823819	0.043526	0.132655	High across cell type family
Atp2b2	0.965884	9.27265e-11	0.0341162	High across cell type family
Atp2b3	0.914292	6.66678e-10	0.0857081	High across cell type family
Atp2b4	0	0	1	None
Atp2c1	1.21364e-07	0.15766	0.84234	None
Atp2c2	0.303333	0.116868	0.579799	High across cell type family
Atp4a	0.253169	0	0.746831	High across cell type family
Atp5a1	0.773182	0	0.226818	High across cell type family
Atp5b	0.696473	0	0.303527	High across cell type family
Atp5c1	0.47019	0.1706	0.35921	High across cell type family
Atp5d	0	0.711033	0.288967	High across location
Atp5e	4.36339e-20	0.435975	0.564025	High across location
Atp5g1	0.954294	0	0.0457064	High across cell type family
Atp5g2	0.297149	0.592765	0.110086	Both to location and cell type
Atp5g3	0.91836	0.0651592	0.0164811	High across cell type family
Atp5h	0.564549	0.18902	0.246431	High across cell type family
Atp5j	0.477053	0	0.522947	High across cell type family
Atp5j2	0.704085	0	0.295915	High across cell type family
Atp5k	0.668982	0.115519	0.215499	High across cell type family
Atp5l	0.640949	0.329407	0.0296432	Both to location and cell type
Atp5o	0	0.303602	0.696398	High across location
Atp6ap1	0.88259	0	0.11741	High across cell type family
Atp6ap1l	0.225205	0.500782	0.274012	High across location
Atp6ap2	0.857576	0.0105857	0.131838	High across cell type family
Atp6v0a1	0.952862	0	0.0471384	High across cell type family
Atp6v0a2	0.965579	0	0.034421	High across cell type family
Atp6v0a4	1.22799e-09	0.0906423	0.909358	None
Atp6v0b	0.0406588	0	0.959341	None
Atp6v0c	0.439942	0.372956	0.187102	Both to location and cell type
Atp6v0d1	0.767554	0.230014	0.00243192	High across cell type family
Atp6v0e	0.98912	0.00743642	0.00344377	High across cell type family
Atp6v0e2	0.964131	5.04961e-11	0.0358692	High across cell type family
Atp6v1a	0.942774	0	0.057226	High across cell type family
Atp6v1b2	0.990522	1.21667e-11	0.00947785	High across cell type family
Atp6v1c1	0.979982	0	0.0200182	High across cell type family
Atp6v1c2	0.12465	0.0925761	0.782773	None
Atp6v1d	0.942282	0.0313904	0.0263276	High across cell type family
Atp6v1e1	0.945089	0.0358988	0.0190118	High across cell type family
Atp6v1e2	0.732802	0.120672	0.146526	High across cell type family
Atp6v1f	0.615735	1.25475e-08	0.384265	High across cell type family
Atp6v1g1	0	0	1	None
Atp6v1g2	0.97687	0.0104636	0.0126662	High across cell type family
Atp6v1g3	0.848144	3.6433e-11	0.151856	High across cell type family
Atp6v1h	0.980364	0.0167647	0.00287167	High across cell type family
Atp7a	0.978678	0.00235226	0.0189693	High across cell type family
Atp7b	0.895469	0.0612055	0.0433259	High across cell type family
Atp8a1	0.302408	0.61166	0.0859313	Both to location and cell type
Atp8a2	0.958465	1.9842e-17	0.0415346	High across cell type family
Atp8b1	0	0	1	None
Atp8b2	0.547124	0.366483	0.0863926	Both to location and cell type
Atp8b3	0.976673	0.00576105	0.0175661	High across cell type family
Atp8b5	0.453084	0.11493	0.431987	High across cell type family
Atp9a	0.965132	0.012554	0.0223139	High across cell type family
Atp9b	0.15547	0	0.84453	None
Atpaf1	0.763373	0	0.236627	High across cell type family
Atpaf2	0.185042	0.394233	0.420725	High across location
Atpif1	0.922698	0.00799151	0.0693107	High across cell type family
Atr	0.238063	0.0286076	0.73333	None
Atraid	0.901427	0	0.0985735	High across cell type family
Atrip	0.254417	0.122265	0.623319	High across cell type family
Atrn	0.703223	0.00648629	0.290291	High across cell type family
Atrnl1	0.763165	0.056293	0.180542	High across cell type family
Atrx	0.379527	0	0.620473	High across cell type family
Atxn1	0.583483	0	0.416517	High across cell type family
Atxn10	0.722216	0.0446588	0.233125	High across cell type family
Atxn1l	0.713042	0	0.286958	High across cell type family
Atxn2	0.167571	0.19824	0.634188	None
Atxn2l	0.722205	0	0.277795	High across cell type family
Atxn3	0.265447	0	0.734553	High across cell type family
Atxn7	0.785854	0.163767	0.0503794	High across cell type family
Atxn7l1	0.583926	0.322426	0.0936478	Both to location and cell type
Atxn7l2	0.323412	0.0169805	0.659607	High across cell type family
Atxn7l3	0.961434	0	0.0385657	High across cell type family
Atxn7l3b	0.789678	0	0.210322	High across cell type family
AU015836	0.864199	1.05737e-05	0.135791	High across cell type family
AU021092	0	0	1	None
AU022252	0.82347	0.128283	0.0482471	High across cell type family
AU040320	0.549102	0.277936	0.172962	Both to location and cell type
AU041133	0.401169	0.0620521	0.536779	High across cell type family
Auh	0.980919	0.00571847	0.0133626	High across cell type family
Aunip	0.626695	0.163983	0.209322	High across cell type family
Aup1	0.937773	0.00402462	0.058202	High across cell type family
Aurka	0.121265	0	0.878735	None
Aurkaip1	0	0.347375	0.652625	High across location
Aurkb	0.0923311	0.255013	0.652656	High across location
Aurkc	0	0	1	None
Auts2	0.0637554	0.70552	0.230725	High across location
Aven	0	0	1	None
Avil	0.800236	0.0608459	0.138918	High across cell type family
Avl9	0.190729	0.465974	0.343296	High across location
Avp	0.287832	0.596768	0.1154	Both to location and cell type
Avpi1	0.254599	0.423459	0.321942	Both to location and cell type
Avpr1a	0.160734	0	0.839266	None
Avpr1b	3.59298e-10	0.26839	0.73161	High across location
Avpr2	0.827327	0	0.172673	High across cell type family
AW146154	0.799949	0	0.200051	High across cell type family
AW209491	0.645597	0	0.354403	High across cell type family
AW551984	0.922926	0.0217626	0.0553118	High across cell type family
AW554918	0.14475	0	0.85525	None
Awat2	0.0197156	0.239767	0.740518	None
Axdnd1	0.446137	0	0.553863	High across cell type family
Axin1	0.558769	0	0.441231	High across cell type family
Axin2	0.412197	0	0.587803	High across cell type family
Axl	0.996563	0	0.00343734	High across cell type family
AY074887	0	0.411294	0.588706	High across location
Azi2	0.983535	0.00815348	0.00831185	High across cell type family
Azin1	0.305785	0	0.694215	High across cell type family
Azin2	0.965401	2.13265e-11	0.0345992	High across cell type family
B230217C12Rik	0.881572	0.0423741	0.076054	High across cell type family
B230219D22Rik	0.777166	0.127012	0.0958225	High across cell type family
B230307C23Rik	0	0.705651	0.294349	High across location
B2m	0.98298	6.98529e-11	0.01702	High across cell type family
B3galnt1	0.962071	0.0257636	0.0121657	High across cell type family
B3galnt2	0	0.614361	0.385639	High across location
B3galt1	0.0264877	0.497002	0.47651	High across location
B3galt2	0.259065	0	0.740935	High across cell type family
B3galt4	0.283381	0.259871	0.456748	Both to location and cell type
B3galt5	0.102484	0.524881	0.372636	High across location
B3galt6	0	0	1	None
B3gat1	0.906801	0.052857	0.040342	High across cell type family
B3gat2	0.360761	0.0188881	0.62035	High across cell type family
B3gat3	0.920622	0.0494923	0.0298861	High across cell type family
B3glct	0.472765	0	0.527235	High across cell type family
B3gnt2	0.717369	0	0.282631	High across cell type family
B3gnt3	0.0146643	0	0.985336	None
B3gnt4	0	0	1	None
B3gnt5	0.533299	0.222923	0.243778	High across cell type family
B3gnt6	0.556916	0.253346	0.189738	Both to location and cell type
B3gnt7	0	0	1	None
B3gnt8	0.706014	1.27363e-10	0.293986	High across cell type family
B3gnt9	0.863091	0	0.136909	High across cell type family
B3gntl1	0.875595	0	0.124405	High across cell type family
B430306N03Rik	0.240577	0.277245	0.482177	High across location
B4galnt1	0.924867	0.0105742	0.0645584	High across cell type family
B4galnt4	0.922719	0.0725809	0.00470027	High across cell type family
B4galt1	0.913483	0	0.0865174	High across cell type family
B4galt2	0.215514	0.0575571	0.726929	None
B4galt3	0.644921	0.134974	0.220105	High across cell type family
B4galt4	0.968482	0	0.0315179	High across cell type family
B4galt5	0.771225	0.0448296	0.183946	High across cell type family
B4galt6	0.957823	0	0.0421773	High across cell type family
B4galt7	0	0	1	None
B4gat1	0.691967	0.199293	0.10874	High across cell type family
B630019K06Rik	0.952725	6.95594e-09	0.0472746	High across cell type family
B9d1	0.790359	0	0.209641	High across cell type family
B9d2	0	0.764929	0.235071	High across location
Baalc	0.972423	0.0236872	0.00388949	High across cell type family
Baat	0.502227	0.327005	0.170768	Both to location and cell type
Babam1	0.869832	0	0.130168	High across cell type family
Bace1	0.881448	0	0.118552	High across cell type family
Bace2	0.868768	3.44995e-11	0.131232	High across cell type family
Bach1	0.166434	0	0.833566	None
Bach2	0.687194	0.222847	0.0899581	High across cell type family
Bad	0	0	1	None
Bag1	0.850799	0.112721	0.03648	High across cell type family
Bag2	0.430845	0	0.569155	High across cell type family
Bag3	0.899262	0.0229524	0.077786	High across cell type family
Bag4	0.941867	0.0138907	0.0442423	High across cell type family
Bag5	0.654275	0	0.345725	High across cell type family
Bag6	0.480767	0	0.519233	High across cell type family
Bahcc1	0	0	1	None
Bahd1	0.0311583	0	0.968842	None
Baiap2	0.747409	0.178886	0.0737056	High across cell type family
Baiap2l1	0.456187	0.246766	0.297047	High across cell type family
Baiap2l2	0.197998	0.470895	0.331108	High across location
Baiap3	0.825544	0.146362	0.028094	High across cell type family
Bak1	0.890357	0.0142206	0.0954223	High across cell type family
Bambi	0.61564	0	0.38436	High across cell type family
Banf1	1.98145e-10	0.582834	0.417166	High across location
Bank1	0.33988	0	0.66012	High across cell type family
Banp	0.105191	0.685281	0.209528	High across location
Bap1	0.838107	0.072421	0.0894725	High across cell type family
Bard1	0	0	1	None
Barhl1	0.0372131	0.930893	0.0318939	High across location
Barhl2	0	0	1	None
Barx2	0.656535	0	0.343465	High across cell type family
Basp1	0.926982	0.0181189	0.054899	High across cell type family
Batf	0.827327	0	0.172673	High across cell type family
Batf2	0.652285	0.0517768	0.295938	High across cell type family
Batf3	0.890038	0.00621355	0.103748	High across cell type family
Bax	0.78629	0.0311225	0.182587	High across cell type family
Baz1a	0.634739	1.22617e-15	0.365261	High across cell type family
Baz1b	0.160844	0	0.839156	None
Baz2a	0	0	1	None
Baz2b	0.49071	0	0.50929	High across cell type family
Bbc3	0.661383	0	0.338617	High across cell type family
Bbip1	0.696246	0.0290132	0.27474	High across cell type family
Bbof1	0	0	1	None
Bbox1	0.903574	0.0539089	0.0425167	High across cell type family
Bbs1	0.628002	0.236456	0.135542	High across cell type family
Bbs10	0.896469	0.0456928	0.057838	High across cell type family
Bbs12	0.0174955	0	0.982505	None
Bbs2	0.90228	0.00134107	0.0963786	High across cell type family
Bbs4	0.85153	0	0.14847	High across cell type family
Bbs5	0.651605	0.0376893	0.310706	High across cell type family
Bbs7	0.348021	0.443045	0.208934	Both to location and cell type
Bbs9	0.528339	0.26168	0.209981	Both to location and cell type
Bbx	0	0.51669	0.48331	High across location
BC004004	0.891744	0.0847301	0.0235258	High across cell type family
BC005537	0.25872	0	0.74128	High across cell type family
BC005624	0.896496	0.0411601	0.0623439	High across cell type family
BC016579	1.77432e-08	0.135222	0.864778	None
BC024139	0	0.398776	0.601224	High across location
BC024978	0.876714	0.024248	0.099038	High across cell type family
BC025920	0.320089	0.0133206	0.66659	High across cell type family
BC028528	0.85218	0.113063	0.0347566	High across cell type family
BC029722	0.928879	0.013427	0.057694	High across cell type family
BC030500	0.937248	0.0133878	0.0493639	High across cell type family
BC031181	8.40329e-11	0.583842	0.416158	High across location
BC034090	0.887867	0	0.112133	High across cell type family
BC035044	0.247138	0.557155	0.195707	High across location
BC035947	0.825578	0.0468222	0.1276	High across cell type family
BC048507	0.0627139	0.156444	0.780842	None
BC049715	0.760499	0	0.239501	High across cell type family
BC049762	0	0	1	None
BC051019	0	0.146364	0.853636	None
BC053393	0.827327	0	0.172673	High across cell type family
BC055324	0	0	1	None
BC061237	0.15531	0.263778	0.580912	High across location
Bcam	0.0971971	0.810941	0.091862	High across location
Bcan	0.950915	0	0.0490846	High across cell type family
Bcap29	0.281109	0.369073	0.349818	Both to location and cell type
Bcap31	0.34479	0	0.65521	High across cell type family
Bcar1	0.711441	0	0.288559	High across cell type family
Bcar3	0.972886	0	0.0271141	High across cell type family
Bcas1	0.0320932	0.0619751	0.905932	None
Bcas2	0.524222	0	0.475778	High across cell type family
Bcas3	0	0.366269	0.633731	High across location
Bcat1	0.969099	0	0.0309006	High across cell type family
Bcat2	0.960665	0.00233181	0.0370035	High across cell type family
Bccip	0.43905	0.244011	0.316938	High across cell type family
Bcdin3d	0.812143	0.0223103	0.165547	High across cell type family
Bche	0	0.238782	0.761218	None
Bckdha	0.974839	0	0.0251612	High across cell type family
Bckdhb	0.0627675	0	0.937233	None
Bckdk	0.930768	0	0.069232	High across cell type family
Bcl10	0.976229	0.00514173	0.0186297	High across cell type family
Bcl11a	0.887922	0.0470086	0.065069	High across cell type family
Bcl11b	0.735447	0.258773	0.00577986	Both to location and cell type
Bcl2	0.928365	0.00870933	0.0629257	High across cell type family
Bcl2a1b	0.19706	0.138069	0.664871	None
Bcl2a1d	0	0	1	None
Bcl2l1	0.960179	0	0.039821	High across cell type family
Bcl2l10	0.159655	0.140546	0.699799	None
Bcl2l11	0.100385	0.133164	0.76645	None
Bcl2l12	0.991335	0.00411407	0.00455126	High across cell type family
Bcl2l13	0.872926	1.06494e-10	0.127074	High across cell type family
Bcl2l15	1.02707e-16	0.862128	0.137872	High across location
Bcl2l2	0.724953	0.173698	0.101349	High across cell type family
Bcl3	0	0.5374	0.4626	High across location
Bcl6	0.497722	0.230223	0.272055	High across cell type family
Bcl6b	0.394508	0.337062	0.268429	Both to location and cell type
Bcl7a	0.829954	0.0297069	0.140339	High across cell type family
Bcl7b	0.796758	0	0.203242	High across cell type family
Bcl7c	0.912799	0.0522814	0.0349197	High across cell type family
Bcl9	6.06996e-15	0	1	None
Bcl9l	0.816073	0.0955422	0.0883848	High across cell type family
Bclaf1	0.848615	0	0.151385	High across cell type family
Bco1	0.302656	0.11753	0.579815	High across cell type family
Bco2	0.94704	0	0.0529597	High across cell type family
Bcor	0.87646	0	0.12354	High across cell type family
Bcorl1	0.434428	0.314658	0.250914	Both to location and cell type
Bcr	0	0.287431	0.712569	High across location
Bcs1l	0	0.307724	0.692276	High across location
Bdh1	0.970852	0	0.0291483	High across cell type family
Bdh2	0.976211	0	0.0237886	High across cell type family
Bdkrb1	0	1.83397e-17	1	None
Bdkrb2	0.15531	0.263778	0.580912	High across location
Bdnf	0	0.0731275	0.926872	None
Bdp1	0.493211	0	0.506789	High across cell type family
Bean1	0.974994	0	0.0250058	High across cell type family
Becn1	0.987339	0	0.0126608	High across cell type family
Begain	0.966499	0.0306985	0.00280228	High across cell type family
Bend3	0.615213	0.155036	0.229752	High across cell type family
Bend4	0.956204	0.0109021	0.0328936	High across cell type family
Bend5	0.827659	0.0809977	0.0913429	High across cell type family
Bend6	0.980841	0.0151918	0.00396732	High across cell type family
Bend7	0.568162	0	0.431838	High across cell type family
Best1	0.637933	0	0.362067	High across cell type family
Best2	0.827327	0	0.172673	High across cell type family
Best3	0.657437	0	0.342563	High across cell type family
Bet1	0.962802	0	0.0371978	High across cell type family
Bet1l	0.169047	0.238415	0.592539	None
Bex1	0.940696	0.0242712	0.0350329	High across cell type family
Bex2	0.913705	0	0.0862947	High across cell type family
Bex4	0.738863	0.0522571	0.20888	High across cell type family
Bex6	0.341443	0.179852	0.478705	High across cell type family
Bfar	0.71508	0	0.28492	High across cell type family
Bfsp1	0	3.6138e-10	1	None
Bfsp2	0	0.019207	0.980793	None
Bglap	0	0.250115	0.749885	High across location
Bglap2	0	0.908478	0.0915218	High across location
Bglap3	2.68084e-08	0.057331	0.942669	None
Bgn	0.904679	0	0.0953208	High across cell type family
Bhlha15	0.540206	0	0.459794	High across cell type family
Bhlha9	0.619878	0.12664	0.253482	High across cell type family
Bhlhb9	0.38017	0.103526	0.516304	High across cell type family
Bhlhe22	0.0382131	0.510621	0.451166	High across location
Bhlhe23	0.0282472	0.580595	0.391158	High across location
Bhlhe40	0.794543	0	0.205457	High across cell type family
Bhlhe41	0.693533	0.132097	0.17437	High across cell type family
Bhmt2	0.0126661	0	0.987334	None
Bicc1	0	0	1	None
Bicd1	0.881448	0	0.118552	High across cell type family
Bicd2	0.949677	0.0243702	0.0259524	High across cell type family
Bid	0.892106	0	0.107894	High across cell type family
Bik	1.04106e-09	0.185392	0.814608	None
Bin1	0.866717	0.0562725	0.0770105	High across cell type family
Bin2	0.787803	0	0.212197	High across cell type family
Bin3	0.814781	0.000567678	0.184651	High across cell type family
Birc2	0.121118	0.0316173	0.847265	None
Birc3	0.490294	0	0.509706	High across cell type family
Birc5	0	4.39698e-09	1	None
Birc6	0.284318	0	0.715682	High across cell type family
Birc7	0.90672	0	0.0932797	High across cell type family
Bivm	0.190334	0	0.809666	None
Blcap	0.760869	0.155189	0.0839424	High across cell type family
Blm	0	0	1	None
Blmh	0.846192	0.051333	0.102475	High across cell type family
Blnk	0	0	1	None
Bloc1s1	0.913621	9.6481e-18	0.0863795	High across cell type family
Bloc1s2	0.0357148	0	0.964285	None
Bloc1s3	3.85752e-10	0.485506	0.514494	High across location
Bloc1s4	0	0.724034	0.275966	High across location
Bloc1s5	1.68215e-09	0.104083	0.895917	None
Bloc1s6	0.888649	0.0709261	0.0404246	High across cell type family
Blvra	0.890058	4.64906e-11	0.109942	High across cell type family
Blvrb	0.974552	0	0.0254478	High across cell type family
Blzf1	0	0.0796767	0.920323	None
Bmf	0	0.53052	0.46948	High across location
Bmi1	0.555661	0	0.444339	High across cell type family
Bmp1	0.902171	0	0.0978291	High across cell type family
Bmp15	0.721872	0	0.278128	High across cell type family
Bmp2	0.902336	0.0796141	0.01805	High across cell type family
Bmp2k	0.789061	0	0.210939	High across cell type family
Bmp3	0.754878	0.173579	0.0715425	High across cell type family
Bmp4	0	0	1	None
Bmp5	0	0	1	None
Bmp6	0.405475	0.151393	0.443132	High across cell type family
Bmp7	0.935821	0.00862656	0.0555523	High across cell type family
Bmp8a	0	0	1	None
Bmp8b	0.695579	0.0348875	0.269534	High across cell type family
Bmper	6.26226e-19	0	1	None
Bmpr1a	0.958456	5.07124e-11	0.0415443	High across cell type family
Bmpr1b	0.98945	0.00092594	0.00962439	High across cell type family
Bmpr2	0.530632	0	0.469368	High across cell type family
Bms1	0	0.0391543	0.960846	None
Bmx	0.113527	0	0.886473	None
Bmyc	2.89858e-09	0.221245	0.778755	None
Bnc2	5.60694e-10	0.595725	0.404275	High across location
Bnip1	2.54478e-10	0.185642	0.814358	None
Bnip2	0.938325	0.0105981	0.0510772	High across cell type family
Bnip3	0.971658	0.00415138	0.0241903	High across cell type family
Bnip3l	0	0.565546	0.434454	High across location
Bnipl	0.166996	0.172362	0.660642	None
Boc	0.959164	0.0325181	0.00831763	High across cell type family
Bod1	0.332139	0	0.667861	High across cell type family
Bod1l	0.911332	0.0385437	0.0501243	High across cell type family
Bok	0	0	1	None
Bola1	0.693785	0.00232492	0.30389	High across cell type family
Bola2	0.783742	0.0922931	0.123965	High across cell type family
Bola3	0.522809	0	0.477191	High across cell type family
Bop1	7.84618e-10	0.296757	0.703243	High across location
Bora	0.25895	0	0.74105	High across cell type family
Borcs5	0.837704	0.141814	0.0204816	High across cell type family
Borcs6	0.835573	0	0.164427	High across cell type family
Borcs7	0.688347	0	0.311653	High across cell type family
Borcs8	0	0.557041	0.442959	High across location
Bpgm	0.768227	0.19998	0.0317938	High across cell type family
Bphl	0.782368	0	0.217632	High across cell type family
Bpifa5	0.0882511	3.48788e-10	0.911749	None
Bpifa6	0.15531	0.263778	0.580912	High across location
Bpifb1	0	0.320986	0.679014	High across location
Bpifb2	0.259404	0	0.740596	High across cell type family
Bpifb3	3.43966e-16	0.366305	0.633695	High across location
Bpifb4	9.47987e-10	0.0941582	0.905842	None
Bpifb6	0	0.324055	0.675945	High across location
Bpifc	0	0.327529	0.672471	High across location
Bpnt1	0.529114	0.349212	0.121673	Both to location and cell type
Bptf	0.568006	0	0.431994	High across cell type family
Braf	0.967319	0	0.0326814	High across cell type family
Brap	0.646811	0.135926	0.217263	High across cell type family
Brat1	0.780881	2.16662e-08	0.219119	High across cell type family
Brca1	0.277004	0.398222	0.324774	Both to location and cell type
Brca2	0	0.502582	0.497418	High across location
Brcc3	0.87512	0.0211851	0.103695	High across cell type family
Brd1	0.389739	0.0872384	0.523022	High across cell type family
Brd2	0.452322	1.10496e-17	0.547678	High across cell type family
Brd3	0.849608	5.45e-09	0.150392	High across cell type family
Brd4	0.912566	7.20076e-11	0.087434	High across cell type family
Brd7	0.0968846	0	0.903115	None
Brd8	0.563573	0	0.436427	High across cell type family
Brd9	0.0208885	0	0.979112	None
Brdt	0.767123	0.179078	0.0537987	High across cell type family
Brf1	0.559434	0.145384	0.295181	High across cell type family
Brf2	0	0	1	None
Bri3	1.06197e-09	0.34579	0.65421	High across location
Bri3bp	0.936271	0	0.0637295	High across cell type family
Bricd5	0.93338	0	0.06662	High across cell type family
Brinp1	0.926631	0	0.0733693	High across cell type family
Brinp2	3.74751e-10	0.0975788	0.902421	None
Brinp3	0	0	1	None
Brip1	0	0.526251	0.473749	High across location
Brix1	0	5.13671e-09	1	None
Brk1	0	0.686394	0.313606	High across location
Brms1	0.408584	0.306507	0.284909	Both to location and cell type
Brms1l	0.955637	0.00715494	0.0372079	High across cell type family
Brox	0.0319406	0	0.968059	None
Brpf1	0	0.271606	0.728394	High across location
Brpf3	0.098559	0	0.901441	None
Brs3	0.153036	0.0538021	0.793161	None
Brsk1	0.888335	0	0.111665	High across cell type family
Brsk2	0.904737	2.17461e-11	0.0952633	High across cell type family
Brwd1	0.899239	0	0.100761	High across cell type family
Brwd3	0.512203	0	0.487797	High across cell type family
Bscl2	0.91989	0	0.0801096	High across cell type family
Bsdc1	1.17043e-10	0.368556	0.631444	High across location
Bsg	0.453474	0.0712351	0.475291	High across cell type family
Bsn	0.913475	0.00437537	0.0821493	High across cell type family
Bsnd	0	0.242684	0.757316	None
Bspry	0.208065	0.509068	0.282867	High across location
Bst1	0	0.0319211	0.968079	None
Bst2	0.928342	0	0.0716582	High across cell type family
Btaf1	0.839911	0	0.160089	High across cell type family
Btbd1	0	0.95785	0.0421503	High across location
Btbd10	0.917752	0.0297724	0.0524759	High across cell type family
Btbd16	0	0.42805	0.57195	High across location
Btbd17	0.992879	2.82187e-17	0.00712144	High across cell type family
Btbd18	0.673237	0	0.326763	High across cell type family
Btbd19	0.483025	0.431287	0.0856876	Both to location and cell type
Btbd2	0.780741	0.164123	0.0551361	High across cell type family
Btbd3	0	0.913886	0.0861135	High across location
Btbd6	0.802882	0.0274433	0.169674	High across cell type family
Btbd7	0.52281	0.241523	0.235667	High across cell type family
Btbd8	0	0	1	None
Btbd9	0.437191	0.301356	0.261453	Both to location and cell type
Btc	0.190715	0	0.809285	None
Btd	0.967185	0.015287	0.0175278	High across cell type family
Btf3	0	0.256719	0.743281	High across location
Btf3l4	0.564568	0.0628533	0.372579	High across cell type family
Btg1	0.0112092	0.820765	0.168026	High across location
Btg2	0.524057	0.26772	0.208223	Both to location and cell type
Btg3	0.078797	0.188353	0.73285	None
Btk	0.578608	0.128194	0.293198	High across cell type family
Btla	0.82724	0.0253866	0.147373	High across cell type family
Btn1a1	0.313855	0.17213	0.514014	High across cell type family
Btn2a2	0.0420377	0	0.957962	None
Btnl10	0.15531	0.263778	0.580912	High across location
Btnl2	0.849281	0.000215789	0.150503	High across cell type family
Btnl9	0	0.0836011	0.916399	None
Btrc	0.967723	0.0205426	0.0117343	High across cell type family
Bub1	0.129286	0.45686	0.413855	High across location
Bub1b	0.422735	0.0291844	0.548081	High across cell type family
Bub3	0	0	1	None
Bud13	0.212211	0	0.787789	None
Bud31	0.415363	0.046109	0.538528	High across cell type family
Bves	0	0	1	None
Bysl	0.195711	4.82493e-16	0.804289	None
Bzw1	0.830952	0.0462773	0.122771	High across cell type family
Bzw2	0.624424	0.105165	0.270411	High across cell type family
C130026I21Rik	0.15531	0.263778	0.580912	High across location
C130050O18Rik	0	0	1	None
C130074G19Rik	0	0.506936	0.493064	High across location
C1d	0.463354	0	0.536646	High across cell type family
C1galt1	0.120078	0	0.879922	None
C1galt1c1	0.430371	0.150881	0.418748	High across cell type family
C1qa	0.756723	0.0347489	0.208529	High across cell type family
C1qb	0.69488	0.0661865	0.238933	High across cell type family
C1qbp	0.511517	0.326672	0.16181	Both to location and cell type
C1qc	0.134823	0	0.865177	None
C1ql1	0	0	1	None
C1ql2	0.432511	0.05657	0.510919	High across cell type family
C1ql3	0.528766	8.34455e-17	0.471234	High across cell type family
C1ql4	0.520595	0.02725	0.452155	High across cell type family
C1qtnf1	0.404371	0.517862	0.0777674	Both to location and cell type
C1qtnf2	0.68472	0.0504664	0.264814	High across cell type family
C1qtnf3	0	0.763626	0.236374	High across location
C1qtnf4	0.96422	0.0196447	0.0161357	High across cell type family
C1qtnf6	0.981144	2.2625e-11	0.0188556	High across cell type family
C1qtnf7	0.105057	2.10231e-09	0.894943	None
C1qtnf9	0.551175	0	0.448825	High across cell type family
C1ra	0.508178	0	0.491822	High across cell type family
C1rb	0.69758	0	0.30242	High across cell type family
C1rl	0.0620568	0	0.937943	None
C1s1	0.796657	0.0344102	0.168933	High across cell type family
C2	0.948276	0	0.0517243	High across cell type family
C2cd2	0.569022	0.179165	0.251813	High across cell type family
C2cd2l	0.898423	0	0.101577	High across cell type family
C2cd3	0.328264	0.0545391	0.617197	High across cell type family
C2cd4a	0	0.226486	0.773514	None
C2cd4b	1.6833e-10	0.0350055	0.964995	None
C2cd4c	0.84412	0.0438693	0.11201	High across cell type family
C2cd4d	0.787339	0.180646	0.0320155	High across cell type family
C2cd5	0.937845	0.015516	0.046639	High across cell type family
C3	0	0.786198	0.213802	High across location
C330018D20Rik	0.961531	0.021295	0.0171737	High across cell type family
C3ar1	0	0	1	None
C4b	0.972701	4.23242e-11	0.0272994	High across cell type family
C4bp	0.642492	0.233343	0.124165	High across cell type family
C5ar1	5.73867e-19	0.164226	0.835774	None
C5ar2	0.113527	0	0.886473	None
C7	0	0	1	None
C77080	0.577809	0.0744257	0.347765	High across cell type family
C87436	0.434068	0.358227	0.207706	Both to location and cell type
C8b	0	0	1	None
C8g	0.360511	0.135751	0.503738	High across cell type family
Caap1	0.165585	0.283294	0.55112	High across location
Cab39	0.94118	0.0288021	0.0300177	High across cell type family
Cab39l	0.926483	0.0428514	0.0306652	High across cell type family
Cabin1	0.785616	0	0.214384	High across cell type family
Cables1	0.947509	0	0.0524906	High across cell type family
Cables2	0.939432	0.0421103	0.0184582	High across cell type family
Cabp1	0.880916	0.0422007	0.0768831	High across cell type family
Cabp2	0	0.144783	0.855217	None
Cabp4	0.364484	0.0982788	0.537237	High across cell type family
Cabp5	0	0.105136	0.894864	None
Cabp7	0.70199	0	0.29801	High across cell type family
Cabyr	0.438493	3.94133e-16	0.561507	High across cell type family
Cacfd1	0.877044	0.0301754	0.0927805	High across cell type family
Cachd1	0.414744	0.239098	0.346158	High across cell type family
Cacna1a	0.793026	0.159671	0.0473032	High across cell type family
Cacna1b	0.933233	0.0185097	0.0482574	High across cell type family
Cacna1c	0.824341	0	0.175659	High across cell type family
Cacna1d	0.697569	0	0.302431	High across cell type family
Cacna1e	0.911047	0.00525754	0.0836956	High across cell type family
Cacna1f	0	0.114449	0.885551	None
Cacna1g	0.799336	0	0.200664	High across cell type family
Cacna1h	0	0	1	None
Cacna1i	0.901561	1.83909e-10	0.0984392	High across cell type family
Cacna1s	0.0435302	0	0.95647	None
Cacna2d1	0.841071	0.0965054	0.0624232	High across cell type family
Cacna2d2	0.902523	0.0644014	0.0330756	High across cell type family
Cacna2d3	0.822826	0.082154	0.0950196	High across cell type family
Cacna2d4	0.706365	2.97648e-11	0.293635	High across cell type family
Cacnb1	0.061247	0.667585	0.271168	High across location
Cacnb2	0.837939	0	0.162061	High across cell type family
Cacnb3	0.925145	0.0407846	0.0340705	High across cell type family
Cacnb4	0.937752	0	0.0622478	High across cell type family
Cacng1	0.0282032	1.11194e-08	0.971797	None
Cacng2	0.966546	6.90337e-11	0.0334543	High across cell type family
Cacng3	0.883609	0.0517631	0.0646279	High across cell type family
Cacng4	0.490345	0	0.509655	High across cell type family
Cacng5	0	0	1	None
Cacng6	0	0	1	None
Cacng7	0.336562	0.399806	0.263633	Both to location and cell type
Cacng8	0.972462	0.0228857	0.00465186	High across cell type family
Cactin	0.023975	0.89812	0.0779048	High across location
Cacul1	0.20562	0	0.79438	None
Cacybp	0.719427	0	0.280573	High across cell type family
Cad	0.77868	0.0636204	0.157699	High across cell type family
Cadm1	2.1185e-10	0.100488	0.899512	None
Cadm2	0	0	1	None
Cadm3	0.947938	0.0243014	0.0277601	High across cell type family
Cadm4	0.914515	0.0638435	0.021641	High across cell type family
Cadps	0.959073	0	0.0409271	High across cell type family
Cadps2	0.592082	0.269126	0.138792	Both to location and cell type
Cage1	0.647834	0.117236	0.23493	High across cell type family
Calb1	0.824119	0	0.175881	High across cell type family
Calb2	0.880555	0.0214486	0.0979962	High across cell type family
Calca	0.793539	0	0.206461	High across cell type family
Calcb	0.13666	0	0.86334	None
Calcoco1	4.16087e-09	0.139949	0.860051	None
Calcr	0.524682	0	0.475318	High across cell type family
Calcrl	0.0295073	0.310018	0.660475	High across location
Cald1	8.52333e-10	0.583717	0.416283	High across location
Calhm2	0.758095	0.0397617	0.202144	High across cell type family
Calm1	0.868502	0.044409	0.087089	High across cell type family
Calm2	0.944761	0.0120497	0.0431897	High across cell type family
Calm3	0.841559	0.129014	0.0294261	High across cell type family
Calml4	0.912324	1.06057e-11	0.0876763	High across cell type family
Caln1	0.881855	0.0825346	0.0356107	High across cell type family
Calr	0.65233	0.326725	0.020945	Both to location and cell type
Calr3	0.183905	0.161576	0.654518	None
Calr4	0.928981	0.016446	0.0545732	High across cell type family
Calu	0.947496	0.014396	0.0381078	High across cell type family
Caly	0.907929	0.0831429	0.00892815	High across cell type family
Camk1	0	0	1	None
Camk1d	0.879081	0.0818528	0.0390662	High across cell type family
Camk1g	0.940941	0	0.0590592	High across cell type family
Camk2a	0.452184	0.441627	0.10619	Both to location and cell type
Camk2b	0.932767	0.0286103	0.038623	High across cell type family
Camk2d	0.375551	0.30162	0.322829	Both to location and cell type
Camk2g	0.881197	0.0981736	0.0206294	High across cell type family
Camk2n1	0.287046	0.691461	0.0214931	Both to location and cell type
Camk2n2	0.969807	0.0185077	0.0116854	High across cell type family
Camk4	0.736728	0.0927448	0.170527	High across cell type family
Camkk1	0.92814	0	0.0718601	High across cell type family
Camkk2	0.729379	0.0566444	0.213977	High across cell type family
Camkmt	0	0.82342	0.17658	High across location
Camkv	0.578283	0.316103	0.105613	Both to location and cell type
Caml	0.879413	0.0181961	0.102391	High across cell type family
Camp	0.473066	0.126473	0.400462	High across cell type family
Camsap1	0.913002	0.0213664	0.065632	High across cell type family
Camsap2	0.872106	0	0.127894	High across cell type family
Camsap3	0.95381	1.75315e-10	0.0461902	High across cell type family
Camta1	0.92507	0	0.0749302	High across cell type family
Camta2	0.835216	0	0.164784	High across cell type family
Cand1	0.742714	0.0537549	0.203531	High across cell type family
Cand2	0.955384	0.0302659	0.0143498	High across cell type family
Cant1	0.827436	0	0.172564	High across cell type family
Canx	0	0.0991687	0.900831	None
Cap1	2.66735e-08	0.749216	0.250784	High across location
Cap2	0.00209537	3.17165e-10	0.997905	None
Capg	0.196223	0	0.803777	None
Capn1	0	0	1	None
Capn10	0.88071	0.027223	0.0920672	High across cell type family
Capn11	0.898457	0	0.101543	High across cell type family
Capn12	0.491395	0	0.508605	High across cell type family
Capn13	0.237845	0.0990961	0.663059	None
Capn15	0	0.751538	0.248462	High across location
Capn2	0.973245	0.0226834	0.00407165	High across cell type family
Capn3	0	0	1	None
Capn5	0.912722	0.0706898	0.0165886	High across cell type family
Capn6	0.726566	0.118303	0.155131	High across cell type family
Capn7	0.197815	0.100007	0.702178	None
Capn8	0.827327	0	0.172673	High across cell type family
Capn9	0.931655	0	0.0683447	High across cell type family
Capns1	0.216639	0	0.783361	None
Capns2	0	0.347559	0.652441	High across location
Caprin1	0.804766	0	0.195234	High across cell type family
Caprin2	0.615019	0.185532	0.199449	High across cell type family
Caps2	0	0	1	None
Capsl	0.735749	0.0828496	0.181402	High across cell type family
Capza1	0.299339	0.210606	0.490056	High across cell type family
Capza2	0.128185	0.610212	0.261604	High across location
Capzb	6.49395e-10	0.68013	0.31987	High across location
Car1	5.81453e-09	0.0329446	0.967055	None
Car10	1.26079e-09	0.375681	0.624319	High across location
Car11	0.640533	0.0460783	0.313389	High across cell type family
Car12	0.582966	0.409128	0.0079055	Both to location and cell type
Car13	0	0.381864	0.618136	High across location
Car14	0.722367	0.0599608	0.217673	High across cell type family
Car15	0	0	1	None
Car2	0.925733	0.0132461	0.0610212	High across cell type family
Car3	0.694907	4.72412e-10	0.305093	High across cell type family
Car4	0	0.626035	0.373965	High across location
Car5a	0	0	1	None
Car5b	0.981301	0.00610691	0.0125921	High across cell type family
Car6	0.179967	0.265848	0.554185	High across location
[truncated: 16,646 more rows]

## Sheet: Mmus.AST-Glut
Table S5. LMM results for mice astrocytes-Glut.
Gene	Cell type	location	Residual	Category
0610009B22Rik	0.851874	0	0.148126	High across cell type family
0610010K14Rik	3.0709e-10	0.62566	0.37434	High across location
0610030E20Rik	0.16625	0.624764	0.208986	High across location
0610040J01Rik	0.647973	0.0150926	0.336934	High across cell type family
1110002E22Rik	0.224796	0.41024	0.364964	High across location
1110004F10Rik	0.257842	0	0.742158	High across cell type family
1110017D15Rik	0	0	1	None
1110032F04Rik	0.439258	0.354559	0.206183	Both to location and cell type
1110038F14Rik	0.448238	0.212167	0.339595	High across cell type family
1110059E24Rik	0	0.134504	0.865496	None
1110059G10Rik	0	0.491691	0.508309	High across location
1110065P20Rik	0.109766	0.254774	0.63546	High across location
1190005I06Rik	0.80619	0.0650927	0.128717	High across cell type family
1500009L16Rik	0.366789	0	0.633211	High across cell type family
1500011B03Rik	0.945526	0	0.0544736	High across cell type family
1600012H06Rik	0.898941	0.0693742	0.0316849	High across cell type family
1600014C10Rik	0.813925	0.107924	0.0781512	High across cell type family
1600014C23Rik	0.981219	0.00109722	0.0176842	High across cell type family
1700001C19Rik	0.751591	4.06653e-10	0.248409	High across cell type family
1700001F09Rik	0	0.0783663	0.921634	None
1700001J03Rik	0.841655	0.0377833	0.120562	High across cell type family
1700001O22Rik	0.679524	0	0.320476	High across cell type family
1700001P01Rik	0	0	1	None
1700003E16Rik	0.662489	0.258863	0.0786488	Both to location and cell type
1700003F12Rik	0.3968	7.31847e-17	0.6032	High across cell type family
1700008O03Rik	0.806507	0	0.193493	High across cell type family
1700010I14Rik	0.0548116	0.869274	0.0759148	High across location
1700011L22Rik	0	0.0294081	0.970592	None
1700011M02Rik	0.278502	0.238449	0.483049	High across cell type family
1700012B09Rik	0	0.0934849	0.906515	None
1700013H16Rik	0.120993	0	0.879007	None
1700014D04Rik	0.316829	0	0.683171	High across cell type family
1700015G11Rik	0.121991	0	0.878009	None
1700016C15Rik	0.758495	0	0.241505	High across cell type family
1700016H13Rik	0	0.303494	0.696506	High across location
1700016K19Rik	0.131054	0.344661	0.524285	High across location
1700017B05Rik	0.592301	0.0537154	0.353984	High across cell type family
1700017N19Rik	0	0.0887127	0.911287	None
1700019A02Rik	0	0.0239599	0.97604	None
1700019D03Rik	0	0	1	None
1700019N19Rik	0.0732664	0	0.926734	None
1700020L24Rik	0	0.4455	0.5545	High across location
1700022I11Rik	0.645	0	0.355	High across cell type family
1700024G13Rik	0.323022	0.404478	0.2725	Both to location and cell type
1700025B11Rik	0.342904	0.226075	0.431021	High across cell type family
1700025G04Rik	0.858609	0.0082137	0.133177	High across cell type family
1700028J19Rik	0.129107	0	0.870893	None
1700028K03Rik	0.710407	0.171979	0.117614	High across cell type family
1700029F12Rik	0.0846684	0	0.915332	None
1700029H14Rik	0.645	0	0.355	High across cell type family
1700029J07Rik	0.847387	0.119014	0.0335988	High across cell type family
1700030J22Rik	0.846722	0.0858807	0.0673968	High across cell type family
1700030K09Rik	0.783799	0.054639	0.161562	High across cell type family
1700037C18Rik	0.702707	0	0.297293	High across cell type family
1700037H04Rik	0.921299	0.0583129	0.0203877	High across cell type family
1700056E22Rik	0.716435	0.0690648	0.2145	High across cell type family
1700066M21Rik	0.819605	0	0.180395	High across cell type family
1700067K01Rik	0.392084	0.0432929	0.564623	High across cell type family
1700088E04Rik	0.75684	0.00198355	0.241176	High across cell type family
1700093K21Rik	0.204613	2.15957e-05	0.795366	None
1700102P08Rik	0.133002	0	0.866998	None
1700109H08Rik	0.0929095	0.194857	0.712234	None
1700113H08Rik	0.0811046	0	0.918895	None
1700123K08Rik	0.282797	0.018901	0.698302	High across cell type family
1700123O20Rik	0.955293	0	0.0447074	High across cell type family
1810009A15Rik	0	0.677795	0.322205	High across location
1810009J06Rik	0.751486	1.16852e-05	0.248502	High across cell type family
1810010H24Rik	0.709641	0	0.290359	High across cell type family
1810024B03Rik	0.918869	0.0462657	0.0348657	High across cell type family
1810030O07Rik	0.464743	0.0383528	0.496904	High across cell type family
1810037I17Rik	0.912205	0.0870186	0.000776553	High across cell type family
1810049J17Rik	0.518613	0	0.481387	High across cell type family
1810055G02Rik	0.19237	0	0.80763	None
1810062G17Rik	0.819351	0.0212227	0.159426	High across cell type family
1810065E05Rik	0.751331	0	0.248669	High across cell type family
2010003K11Rik	0.609512	0	0.390488	High across cell type family
2010106E10Rik	0	0.0756406	0.924359	None
2010109A12Rik	0.238758	0.700716	0.0605259	High across location
2010315B03Rik	0.774472	0	0.225528	High across cell type family
2200002D01Rik	0	0	1	None
2200002J24Rik	0.645664	0.294293	0.0600426	Both to location and cell type
2210016F16Rik	0.804437	0	0.195563	High across cell type family
2210016L21Rik	0.963965	4.32131e-10	0.0360353	High across cell type family
2210408I21Rik	0.285412	0.466333	0.248255	Both to location and cell type
2210418O10Rik	0.278502	0.238449	0.483049	High across cell type family
2300009A05Rik	0.311639	0.434734	0.253628	Both to location and cell type
2310002L09Rik	1.0245e-18	0.0433898	0.95661	None
2310009B15Rik	0	0.10138	0.89862	None
2310011J03Rik	0.847395	0.0974112	0.0551943	High across cell type family
2310022A10Rik	0.923548	0	0.0764524	High across cell type family
2310022B05Rik	0.967607	0	0.0323926	High across cell type family
2310030G06Rik	0.918352	0.0553982	0.0262499	High across cell type family
2310033P09Rik	0.0993467	0	0.900653	None
2310039H08Rik	0.862878	0.00700599	0.130116	High across cell type family
2310046K23Rik	0	0.0211061	0.978894	None
2310057M21Rik	0.8919	0.0606413	0.0474591	High across cell type family
2310061I04Rik	0.451315	0	0.548685	High across cell type family
2410002F23Rik	0.657857	0.0858761	0.256267	High across cell type family
2410004B18Rik	0.090327	0.717576	0.192097	High across location
2410004P03Rik	0.751289	0	0.248711	High across cell type family
2410137M14Rik	0	0.387044	0.612956	High across location
2510002D24Rik	0.868413	0.0615683	0.070019	High across cell type family
2510009E07Rik	0.927061	0.0405883	0.032351	High across cell type family
2510039O18Rik	0.413949	0	0.586051	High across cell type family
2610008E11Rik	0	0.619162	0.380838	High across location
2610021A01Rik	0.0154989	0.784967	0.199534	High across location
2610028H24Rik	0.658995	0	0.341005	High across cell type family
2610042L04Rik	0.776244	0	0.223756	High across cell type family
2610044O15Rik8	0	0.172603	0.827397	None
2610318N02Rik	0.786985	0	0.213015	High across cell type family
2700049A03Rik	0.10525	0.460271	0.434479	High across location
2700062C07Rik	0.76977	0.117185	0.113045	High across cell type family
2700097O09Rik	0.609787	0.342586	0.0476262	Both to location and cell type
2810004N23Rik	0	0.901129	0.0988709	High across location
2810021J22Rik	0	0	1	None
2810408A11Rik	0.925532	0.0195867	0.0548816	High across cell type family
2810459M11Rik	0.917338	0.0240725	0.0585892	High across cell type family
2900026A02Rik	0.525575	0.026023	0.448402	High across cell type family
2900092C05Rik	0.648914	0.290298	0.0607884	Both to location and cell type
3110009E18Rik	0.0558946	0.625167	0.318939	High across location
3110040N11Rik	0.448984	0	0.551016	High across cell type family
3110082I17Rik	0.04519	0	0.95481	None
3300002I08Rik	0.79013	0.00609849	0.203772	High across cell type family
3425401B19Rik	0	0	1	None
3830406C13Rik	3.55136e-18	0	1	None
4833420G17Rik	0.464773	0.290953	0.244275	Both to location and cell type
4833439L19Rik	0.931175	0.0168654	0.0519592	High across cell type family
4921504E06Rik	0.581577	0.175062	0.243361	High across cell type family
4921507P07Rik	0.648706	0	0.351294	High across cell type family
4921517D22Rik	0.0846684	0	0.915332	None
4921524J17Rik	0.599499	0	0.400501	High across cell type family
4921536K21Rik	0.448586	0	0.551414	High across cell type family
4921539E11Rik	0.645	0	0.355	High across cell type family
4930407I10Rik	0.751486	1.16852e-05	0.248502	High across cell type family
4930430F08Rik	0.805362	0.148333	0.0463046	High across cell type family
4930438A08Rik	0.278502	0.238449	0.483049	High across cell type family
4930444P10Rik	0.62602	0.232109	0.141871	High across cell type family
4930447C04Rik	0.867999	0	0.132001	High across cell type family
4930449I24Rik	0.75847	0	0.24153	High across cell type family
4930451I11Rik	0.556053	0.381872	0.0620742	Both to location and cell type
4930453N24Rik	0.909733	0	0.0902673	High across cell type family
4930455H04Rik	0.751591	4.06653e-10	0.248409	High across cell type family
4930486L24Rik	0.75947	5.78783e-08	0.240529	High across cell type family
4930503B20Rik	0.278502	0.238449	0.483049	High across cell type family
4930503L19Rik	0.586861	3.765e-17	0.413139	High across cell type family
4930505A04Rik	1.01917e-10	0.0421973	0.957803	None
4930519G04Rik	0.648914	0.290298	0.0607884	Both to location and cell type
4930522L14Rik	0.274913	0	0.725087	High across cell type family
4930523C07Rik	0.94653	6.25246e-12	0.0534701	High across cell type family
4930524B15Rik	0.241745	6.11328e-10	0.758255	None
4930550C14Rik	0.904639	0	0.0953614	High across cell type family
4930556J24Rik	0.76388	0.00150564	0.234614	High across cell type family
4930558K02Rik	0.420479	0.459691	0.11983	Both to location and cell type
4930562C15Rik	0.411104	0.245203	0.343693	High across cell type family
4930579G24Rik	0.372116	0.484667	0.143217	Both to location and cell type
4930590J08Rik	0.0460731	0	0.953927	None
4931406B18Rik	1.0245e-18	0.0433898	0.95661	None
4931406C07Rik	0.992296	0.00509201	0.00261227	High across cell type family
4931414P19Rik	0	0.855533	0.144467	High across location
4931429L15Rik	0.308779	0.383291	0.30793	Both to location and cell type
4932414N04Rik	0.278502	0.238449	0.483049	High across cell type family
4932438H23Rik	0.964396	0	0.0356041	High across cell type family
4933402J07Rik	1.0245e-18	0.0433898	0.95661	None
4933405L10Rik	0.239062	0.611646	0.149292	High across location
4933405O20Rik	0.751591	4.06653e-10	0.248409	High across cell type family
4933407L21Rik	0.874915	0.0279826	0.0971022	High across cell type family
4933411K16Rik	0	0.308536	0.691464	High across location
4933424G06Rik	0.438423	0.288937	0.27264	Both to location and cell type
4933427D14Rik	0.51309	0	0.48691	High across cell type family
4933430I17Rik	0.0242315	0.0716647	0.904104	None
4933434E20Rik	0	0.635426	0.364574	High across location
5031439G07Rik	0.820758	0.0607291	0.118513	High across cell type family
5430403G16Rik	0.69821	0.0751917	0.226598	High across cell type family
5730409E04Rik	0.939946	0.053503	0.00655068	High across cell type family
5730455P16Rik	0.845575	0.0850295	0.0693954	High across cell type family
5730507C01Rik	0	0	1	None
5730522E02Rik	0.78177	0.160616	0.0576145	High across cell type family
6030458C11Rik	0.835751	0.0560396	0.108209	High across cell type family
6030498E09Rik	0	0	1	None
6330403K07Rik	0.0525422	1.96004e-10	0.947458	None
6430548M08Rik	0.923479	0.0492794	0.0272418	High across cell type family
6430550D23Rik	0.896186	0	0.103814	High across cell type family
6430571L13Rik	0.580255	0	0.419745	High across cell type family
6720489N17Rik	0.723562	0.270594	0.00584412	Both to location and cell type
6820408C15Rik	0.815962	1.00811e-10	0.184038	High across cell type family
7530416G11Rik	0.658995	0	0.341005	High across cell type family
8030462N17Rik	0	0.106471	0.893529	None
8030474K03Rik	3.29385e-10	0.300762	0.699238	High across location
9030624G23Rik	0	0.885991	0.114009	High across location
9130008F23Rik	0.388208	0.448677	0.163115	Both to location and cell type
9130019O22Rik	0.431517	0.344259	0.224224	Both to location and cell type
9130023H24Rik	0.893651	3.3712e-10	0.106349	High across cell type family
9130401M01Rik	0.593367	0.270124	0.136508	Both to location and cell type
9230112D13Rik	0	0.272069	0.727931	High across location
9330159F19Rik	0.661935	0.0362899	0.301775	High across cell type family
9430015G10Rik	0	0	1	None
9430038I01Rik	0.575178	0.29115	0.133672	Both to location and cell type
9430069I07Rik	0.656439	0	0.343561	High across cell type family
9530003J23Rik	0	0.308835	0.691165	High across location
9530053A07Rik	0.26975	0	0.73025	High across cell type family
9530068E07Rik	0	0.638497	0.361503	High across location
9530077C05Rik	0	0.271115	0.728885	High across location
9930012K11Rik	0.665915	0.112169	0.221916	High across cell type family
9930021J03Rik	0.646508	0	0.353492	High across cell type family
9930022D16Rik	0.645	0	0.355	High across cell type family
9930111J21Rik1	0.751486	1.16852e-05	0.248502	High across cell type family
A130010J15Rik	0.611688	0	0.388312	High across cell type family
A1bg	0.759527	1.67817e-08	0.240473	High across cell type family
A1cf	0.751486	1.16852e-05	0.248502	High across cell type family
A2m	0.861099	0.120579	0.0183219	High across cell type family
A3galt2	0	0	1	None
A430005L14Rik	0.668481	0	0.331519	High across cell type family
A430033K04Rik	0.655176	5.78029e-11	0.344824	High across cell type family
A4galt	3.64913e-10	3.45577e-10	1	None
A530064D06Rik	0.278502	0.238449	0.483049	High across cell type family
A630001G21Rik	2.68019e-09	0.0682794	0.931721	None
A630023A22Rik	0.27983	0	0.72017	High across cell type family
A630095N17Rik	0.750237	0	0.249763	High across cell type family
A730046J19Rik	0.105115	0	0.894885	None
A830018L16Rik	0.920937	0.04299	0.0360727	High across cell type family
A830031A19Rik	0.450652	1.44316e-09	0.549348	High across cell type family
A930003A15Rik	0.893642	2.83049e-10	0.106358	High across cell type family
A930009A15Rik	0.875562	0.0321944	0.0922437	High across cell type family
A930017K11Rik	0	0.0141204	0.98588	None
A930018P22Rik	4.29382e-07	0.829333	0.170666	High across location
AA467197	0.467964	0.0620619	0.469974	High across cell type family
AA986860	0	0.0718655	0.928134	None
Aaas	0	0	1	None
Aacs	0.131803	0.0144262	0.853771	None
Aadat	0.14677	0.235832	0.617397	None
Aagab	0.490778	0.22031	0.288912	High across cell type family
Aak1	0.91933	0.0263554	0.0543145	High across cell type family
Aamdc	0.937985	0.00662146	0.0553936	High across cell type family
Aamp	0.845339	0.0518743	0.102787	High across cell type family
Aanat	0.232447	0.0937091	0.673844	None
Aar2	3.18596e-10	0.204386	0.795614	None
Aard	0.185561	0	0.814439	None
Aars	0.797597	0.111544	0.0908585	High across cell type family
Aars2	0.482209	0.260427	0.257364	Both to location and cell type
Aarsd1	0	0.316468	0.683532	High across location
Aasdh	0.825839	0	0.174161	High across cell type family
Aasdhppt	0	0	1	None
Aass	0.967601	0.0241317	0.00826695	High across cell type family
Aatf	0	0.603431	0.396569	High across location
Aatk	0.668995	0.201937	0.129069	High across cell type family
AB124611	0.45389	0.0691302	0.47698	High across cell type family
Abat	0.6247	0.220694	0.154606	High across cell type family
Abca1	0.942729	0	0.0572709	High across cell type family
Abca12	0.00140673	0.189416	0.809177	None
Abca13	0.0364146	0	0.963585	None
Abca17	4.56002e-10	0.00243886	0.997561	None
Abca2	0.664187	0.0916157	0.244197	High across cell type family
Abca3	0.307719	0.560215	0.132066	Both to location and cell type
Abca4	0.472375	0	0.527625	High across cell type family
Abca5	0.883657	1.56002e-16	0.116343	High across cell type family
Abca6	0	0	1	None
Abca7	0	0.768949	0.231051	High across location
Abca8a	0.0785826	0.326602	0.594815	High across location
Abca8b	0.401649	0	0.598351	High across cell type family
Abca9	0.195305	0.703701	0.100993	High across location
Abcb10	0	0.614388	0.385612	High across location
Abcb11	0.751331	0	0.248669	High across cell type family
Abcb1a	0.764752	0.203362	0.0318852	High across cell type family
Abcb1b	0.617072	0.021188	0.36174	High across cell type family
Abcb4	0.505363	0.0566112	0.438026	High across cell type family
Abcb6	0.244927	0.151804	0.603269	None
Abcb7	0.623515	0.34857	0.027915	Both to location and cell type
Abcb8	0.241797	0.498167	0.260037	High across location
Abcb9	0.890919	0	0.109081	High across cell type family
Abcc1	0.283448	0	0.716552	High across cell type family
Abcc10	0.650342	0.309347	0.0403112	Both to location and cell type
Abcc12	0	0	1	None
Abcc2	0	0.237093	0.762907	None
Abcc3	0	0.769261	0.230739	High across location
Abcc4	0.922235	0	0.077765	High across cell type family
Abcc5	0.425848	0	0.574152	High across cell type family
Abcc6	0.465467	0.0878268	0.446707	High across cell type family
Abcc8	0.810389	0.128699	0.0609123	High across cell type family
Abcc9	0.0706151	0.0781268	0.851258	None
Abcd1	0.783284	1.46347e-10	0.216716	High across cell type family
Abcd2	0.965783	0.014484	0.0197332	High across cell type family
Abcd3	0.938371	0.0475015	0.0141278	High across cell type family
Abcd4	0.976395	0.00436079	0.0192441	High across cell type family
Abce1	0.567981	0.150595	0.281424	High across cell type family
Abcf1	0.638814	0.190132	0.171054	High across cell type family
Abcf2	0.172151	0.695613	0.132236	High across location
Abcf3	0.424824	0.148487	0.426689	High across cell type family
Abcg1	0.905207	0.023413	0.0713803	High across cell type family
Abcg2	0.0546095	0	0.94539	None
Abcg3	0.751331	0	0.248669	High across cell type family
Abcg4	0.866475	0	0.133525	High across cell type family
Abcg5	0.759527	1.67817e-08	0.240473	High across cell type family
Abcg8	0.420363	0.26426	0.315377	Both to location and cell type
Abhd10	0.880088	0.0615897	0.058322	High across cell type family
Abhd11	0.779955	0	0.220045	High across cell type family
Abhd12	0	6.41662e-20	1	None
Abhd12b	4.78467e-11	0.972033	0.0279671	High across location
Abhd13	0.569636	0	0.430364	High across cell type family
Abhd14a	0.645289	0.102039	0.252672	High across cell type family
Abhd14b	0.610187	0.174375	0.215438	High across cell type family
Abhd15	0.690452	0.145125	0.164423	High across cell type family
Abhd16a	0	0.540789	0.459211	High across location
Abhd17a	0.642304	0.193197	0.164499	High across cell type family
Abhd17b	0.843164	0.0960992	0.0607364	High across cell type family
Abhd17c	0.640647	0.00782466	0.351529	High across cell type family
Abhd18	0.167015	1.68141e-10	0.832985	None
Abhd2	0.243922	0.446985	0.309092	High across location
Abhd3	0.980421	0	0.0195786	High across cell type family
Abhd4	0.979594	0	0.0204056	High across cell type family
Abhd5	0.952703	0.00264849	0.044649	High across cell type family
Abhd6	0.775818	0.137356	0.0868255	High across cell type family
Abhd8	0.885893	0	0.114107	High across cell type family
Abi1	0.773063	0	0.226937	High across cell type family
Abi2	0.698401	0	0.301599	High across cell type family
Abi3	0	0	1	None
Abi3bp	3.48896e-10	0.55223	0.44777	High across location
Abl1	0.953959	0.0189375	0.0271031	High across cell type family
Abl2	0	0.32721	0.67279	High across location
Ablim1	0.67308	0.119649	0.20727	High across cell type family
Ablim2	0	0.173368	0.826632	None
Ablim3	0.853667	0.0569902	0.0893424	High across cell type family
Abo	0.270796	0.124995	0.604209	High across cell type family
Abr	0.520001	0.284071	0.195928	Both to location and cell type
Abra	0.340881	0.0277838	0.631335	High across cell type family
Abracl	0.860822	0.0755783	0.0636001	High across cell type family
Abt1	0	0	1	None
Abtb1	0.865904	0.0830191	0.0510772	High across cell type family
Abtb2	0.822478	0	0.177522	High across cell type family
Acaa1a	0.977142	0	0.0228582	High across cell type family
Acaa1b	0	0	1	None
Acaa2	0.966579	0.00774932	0.025672	High across cell type family
Acaca	0.758585	0.186091	0.0553241	High across cell type family
Acacb	0.36271	0.0776831	0.559607	High across cell type family
Acad10	0.798121	0	0.201879	High across cell type family
Acad11	0.896728	0.081722	0.0215498	High across cell type family
Acad12	0.939931	0.028362	0.0317072	High across cell type family
Acad8	0.800697	0.0892495	0.110054	High across cell type family
Acad9	0.334846	0.330285	0.334869	Both to location and cell type
Acadl	0.972465	0.00232776	0.0252073	High across cell type family
Acadm	0.982565	0.00440648	0.0130287	High across cell type family
Acads	0.989548	1.5782e-11	0.010452	High across cell type family
Acadsb	0.781578	0.189785	0.0286367	High across cell type family
Acadvl	0.960414	0	0.0395856	High across cell type family
Acan	0.0993954	0.124336	0.776268	None
Acap1	0.301436	0.181669	0.516895	High across cell type family
Acap2	0.785292	0	0.214708	High across cell type family
Acap3	0.656457	0	0.343543	High across cell type family
Acat1	1.50183e-10	0.265457	0.734543	High across location
Acat2	0.912165	1.35906e-08	0.0878345	High across cell type family
Acat3	0.984183	0	0.015817	High across cell type family
Acbd3	1.59247e-09	0.144184	0.855816	None
Acbd4	0.63512	0.0923478	0.272532	High across cell type family
Acbd5	0	0	1	None
Acbd6	0.875802	0	0.124198	High across cell type family
Acbd7	0.233887	0	0.766113	None
Accs	0.886983	0.0197534	0.0932639	High across cell type family
Accsl	0.100792	0	0.899208	None
Acd	0.872754	0.0874377	0.0398088	High across cell type family
Ace	0.489144	0.37437	0.136486	Both to location and cell type
Ace2	0.454957	0.0540235	0.491019	High across cell type family
Acer2	0.616633	0.30249	0.0808773	Both to location and cell type
Acer3	0.0191134	0.102651	0.878236	None
Ache	0.893145	0.0738934	0.0329614	High across cell type family
Acin1	0	0.435238	0.564762	High across location
Ackr1	0.926745	0.0617558	0.0114994	High across cell type family
Ackr2	0.277812	0	0.722188	High across cell type family
Ackr3	0.899626	0	0.100374	High across cell type family
Ackr4	0.148688	0.648327	0.202986	High across location
Acly	0	0.217729	0.782271	None
Acmsd	0	0.101992	0.898008	None
Acnat1	0.391083	0.449269	0.159647	Both to location and cell type
Acnat2	0.101337	0	0.898663	None
Aco1	0.985138	0.00605098	0.00881125	High across cell type family
Aco2	0.912166	0.0333765	0.0544572	High across cell type family
Acot1	0.970877	0.00884806	0.0202754	High across cell type family
Acot10	0.3225	0	0.6775	High across cell type family
Acot11	0.994486	0.00100899	0.00450486	High across cell type family
Acot12	0.398364	0.230101	0.371534	High across cell type family
Acot13	0.722841	0.0485583	0.228601	High across cell type family
Acot2	0.898045	0.00742069	0.0945346	High across cell type family
Acot3	0	0	1	None
Acot4	0.033878	0.55814	0.407982	High across location
Acot5	0	0.0888755	0.911124	None
Acot6	0.947322	0.0242879	0.0283897	High across cell type family
Acot7	0.935907	0.0541048	0.00998839	High across cell type family
Acot8	0.135505	0.252168	0.612328	High across location
Acot9	0.892826	0.0714189	0.0357556	High across cell type family
Acox1	0.84205	0.136504	0.0214459	High across cell type family
Acox2	0.711491	0.039866	0.248643	High across cell type family
Acox3	0.870074	0.0148795	0.115047	High across cell type family
Acoxl	0	0.0913226	0.908677	None
Acp1	0	0	1	None
Acp2	0.0467628	0.260331	0.692906	High across location
Acp5	0.485104	0	0.514896	High across cell type family
Acp6	0.929031	0	0.0709695	High across cell type family
Acpp	0.0846684	0	0.915332	None
Acr	0	0	1	None
Acrbp	0.368054	0.388569	0.243377	Both to location and cell type
Acrv1	0.278502	0.238449	0.483049	High across cell type family
Acsbg1	0.99492	0.0018089	0.00327135	High across cell type family
Acsbg2	0.612505	0.186186	0.20131	High across cell type family
Acsf2	0.975199	0	0.0248008	High across cell type family
Acsf3	0.217908	0.720163	0.0619284	High across location
Acsl1	0.980438	0	0.0195618	High across cell type family
Acsl3	0.913472	0.0466186	0.0399092	High across cell type family
Acsl4	0.938909	0.0419475	0.0191434	High across cell type family
Acsl5	0.881739	0	0.118261	High across cell type family
Acsl6	0.96923	0	0.0307704	High across cell type family
Acsm1	0.0846684	0	0.915332	None
Acsm4	0.101337	0	0.898663	None
Acsm5	0.657863	0.0161871	0.32595	High across cell type family
Acss1	0.978235	0.00292416	0.0188405	High across cell type family
Acss2	0.958663	0	0.0413366	High across cell type family
Acss3	0.657468	0.11505	0.227482	High across cell type family
Acta1	0.91704	0.0612389	0.0217215	High across cell type family
Acta2	0.284123	0.349889	0.365988	Both to location and cell type
Actb	0	0	1	None
Actbl2	0.733371	0.0830253	0.183604	High across cell type family
Actc1	0.406051	0.2422	0.351749	High across cell type family
Actg1	0.0439442	0.0144423	0.941614	None
Actl10	1.0245e-18	0.0433898	0.95661	None
Actl6a	0.459505	0.298032	0.242463	Both to location and cell type
Actl6b	0.950887	0.0283302	0.0207828	High across cell type family
Actl7b	8.67437e-11	0.280082	0.719918	High across location
Actl9	0.333985	0	0.666015	High across cell type family
Actn1	0.30042	6.63967e-17	0.69958	High across cell type family
Actn2	0.276359	0.0679697	0.655672	High across cell type family
Actn3	0.934179	0.0235368	0.0422843	High across cell type family
Actn4	0	0	1	None
Actr10	0.475071	0.341824	0.183104	Both to location and cell type
Actr1a	4.45708e-09	0.334171	0.665829	High across location
Actr1b	0.879697	0	0.120303	High across cell type family
Actr2	0.818111	0.157709	0.0241797	High across cell type family
Actr3	0.80388	0.0310689	0.165051	High across cell type family
Actr3b	2.16157e-17	0	1	None
Actr5	0	0.0111917	0.988808	None
Actr6	0.319073	0.514873	0.166054	Both to location and cell type
Actr8	0.376389	0.240769	0.382843	High across cell type family
Actrt3	0.739438	0.0840989	0.176464	High across cell type family
Acvr1	0.207158	0	0.792842	None
Acvr1b	0.92469	0.03534	0.0399702	High across cell type family
Acvr1c	0	0	1	None
Acvr2a	0.637651	0	0.362349	High across cell type family
Acvr2b	1.91653e-17	0	1	None
Acvrl1	1.50818e-09	0.072132	0.927868	None
Acy1	0.976979	0.00332237	0.0196982	High across cell type family
Acy3	0.727261	0.0725383	0.2002	High across cell type family
Acyp1	0.597149	0	0.402851	High across cell type family
Acyp2	0.283112	0	0.716888	High across cell type family
Ada	0	0	1	None
Adad2	0	0.026195	0.973805	None
Adal	0	0.0797131	0.920287	None
Adam10	0.132891	0	0.867109	None
Adam11	0	0	1	None
Adam12	0.356929	0.317896	0.325175	Both to location and cell type
Adam15	0	0	1	None
Adam17	0.95875	0.00986351	0.0313868	High across cell type family
Adam19	0.844024	0.0060162	0.14996	High across cell type family
Adam1a	0	0	1	None
Adam1b	0.394185	0.235073	0.370742	High across cell type family
Adam2	0.448586	0	0.551414	High across cell type family
Adam21	0.249477	0.605535	0.144988	High across location
Adam22	0.984664	0	0.0153359	High across cell type family
Adam23	0.870123	0.00597544	0.123901	High across cell type family
Adam28	0.147546	0	0.852454	None
Adam3	0.0938902	0	0.90611	None
Adam30	0.610572	0	0.389428	High across cell type family
Adam32	0.146649	9.6499e-10	0.853351	None
Adam33	0.230479	0	0.769521	None
Adam34	0	0.308835	0.691165	High across location
Adam4	0.0782304	0	0.92177	None
Adam5	0.463965	7.58942e-11	0.536035	High across cell type family
Adam7	7.00528e-09	0.144707	0.855293	None
Adam8	1.86696e-10	0.842594	0.157406	High across location
Adam9	0	0.366448	0.633552	High across location
Adamts1	0.767346	0	0.232654	High across cell type family
Adamts10	0.184438	0.674147	0.141414	High across location
Adamts12	0.700266	0.146207	0.153527	High across cell type family
Adamts13	0	0.00959883	0.990401	None
Adamts14	0	1.29601e-16	1	None
Adamts15	0	0.432423	0.567577	High across location
Adamts16	0.268875	1.3742e-17	0.731125	High across cell type family
Adamts17	0.621167	0	0.378833	High across cell type family
Adamts18	0.132394	0.73807	0.129537	High across location
Adamts19	0.405887	2.12546e-10	0.594113	High across cell type family
Adamts2	0	0.30324	0.69676	High across location
Adamts20	0.407837	0	0.592163	High across cell type family
Adamts3	0.0881719	0.701025	0.210803	High across location
Adamts4	0.0315894	0.306881	0.66153	High across location
Adamts5	3.79139e-10	0.709013	0.290987	High across location
Adamts6	0	0	1	None
Adamts7	0	0.198545	0.801455	None
Adamts8	0.688324	0.0870493	0.224627	High across cell type family
Adamts9	0.979186	0.0122288	0.00858488	High across cell type family
Adamtsl1	0.909124	0	0.0908761	High across cell type family
Adamtsl2	0.7519	0	0.2481	High across cell type family
Adamtsl3	0.128232	0	0.871768	None
Adamtsl4	5.21768e-09	0.674041	0.325959	High across location
Adamtsl5	0.827952	0	0.172048	High across cell type family
Adap1	0.909108	0.0727328	0.0181592	High across cell type family
Adap2	0.0654166	0	0.934583	None
Adar	0.915619	0.061945	0.0224359	High across cell type family
Adarb1	0.828668	0.137294	0.0340385	High across cell type family
Adarb2	0.696039	0.0629614	0.241	High across cell type family
Adat1	0.355003	0.465645	0.179351	Both to location and cell type
Adat2	0	0	1	None
Adat3	0.0158224	0	0.984178	None
Adck1	0.933388	0.0105644	0.0560474	High across cell type family
Adck2	0	0.14867	0.85133	None
Adck5	0.286955	0	0.713045	High across cell type family
Adcy1	0.743924	0.192879	0.0631976	High across cell type family
Adcy10	0.247154	0	0.752846	None
Adcy2	0.487687	0	0.512313	High across cell type family
Adcy3	0.512494	0.281812	0.205694	Both to location and cell type
Adcy4	0	0	1	None
Adcy5	0.844873	0.0478956	0.107231	High across cell type family
Adcy6	0.0583112	0.796501	0.145188	High across location
Adcy7	0.861508	4.74487e-11	0.138492	High across cell type family
Adcy8	0.337151	0.432564	0.230285	Both to location and cell type
Adcy9	0.66242	0.24406	0.0935205	High across cell type family
Adcyap1	0.964099	0.00264446	0.0332565	High across cell type family
Adcyap1r1	0.889842	0.0545904	0.0555672	High across cell type family
Add1	0.378659	0.290452	0.330889	Both to location and cell type
Add2	0.934749	0	0.0652507	High across cell type family
Add3	0.985742	0	0.0142579	High across cell type family
Adgb	0	0	1	None
Adgra1	0	0	1	None
Adgra2	2.89678e-09	0.147987	0.852013	None
Adgra3	0.9663	0	0.0337004	High across cell type family
Adgrb1	0.582276	0.248916	0.168808	High across cell type family
Adgrb2	5.41674e-15	0	1	None
Adgrb3	0	0	1	None
Adgrd1	0.272346	0.40628	0.321374	Both to location and cell type
Adgre1	0	0.579272	0.420728	High across location
Adgre5	0.960192	0	0.039808	High across cell type family
Adgrf2	0	0.168649	0.831351	None
Adgrf3	0	0.277267	0.722733	High across location
Adgrf4	0.384357	8.83308e-18	0.615643	High across cell type family
Adgrf5	1.11922e-09	0.705018	0.294982	High across location
Adgrg1	0.967599	0.0124839	0.019917	High across cell type family
Adgrg2	0.790811	0	0.209189	High across cell type family
Adgrg3	0	0.100642	0.899358	None
Adgrg4	0.101337	0	0.898663	None
Adgrg5	0.333	0	0.667	High across cell type family
Adgrg6	0.746639	0.171842	0.0815194	High across cell type family
Adgrl1	0.709074	0.0499466	0.240979	High across cell type family
Adgrl2	0.806062	0.063572	0.130366	High across cell type family
Adgrl3	0	0.0473868	0.952613	None
Adgrl4	0	0.49753	0.50247	High across location
Adgrv1	0.279532	0.124627	0.59584	High across cell type family
Adh1	0.750237	0	0.249763	High across cell type family
Adh4	0	0.308442	0.691558	High across location
Adh5	0.961697	8.65367e-11	0.0383026	High across cell type family
Adh7	0	0.232347	0.767653	None
Adhfe1	0.979639	5.61521e-11	0.0203608	High across cell type family
Adi1	0	0	1	None
Adig	0.577723	0.0400659	0.382211	High across cell type family
Adipoq	0	0.0834069	0.916593	None
Adipor1	0.834768	0.0793972	0.0858351	High across cell type family
Adipor2	0.616548	0.0883251	0.295127	High across cell type family
Adk	0.961669	0.00586417	0.0324672	High across cell type family
Adm	0.238878	0	0.761122	None
Adnp	0.0342381	0	0.965762	None
Adnp2	0	0.22629	0.77371	None
Ado	0	0	1	None
Adora1	0	0	1	None
Adora2a	0.477043	0	0.522957	High across cell type family
Adora2b	0.993546	6.55449e-19	0.00645378	High across cell type family
Adora3	0.409569	0.24704	0.34339	High across cell type family
Adpgk	0.479602	0.242388	0.278011	High across cell type family
Adprh	0.632795	1.29219e-17	0.367205	High across cell type family
Adprhl1	0.611426	0	0.388574	High across cell type family
Adprm	4.1431e-10	0.146313	0.853687	None
Adra1a	0.61408	0.123944	0.261976	High across cell type family
Adra1b	0	0	1	None
Adra1d	2.57513e-09	0.0369981	0.963002	None
Adra2a	0.819286	0.0591379	0.121577	High across cell type family
Adra2b	0.050723	0.267229	0.682048	High across location
Adra2c	0.819712	0.0661278	0.114161	High across cell type family
Adrb1	0.307746	0	0.692254	High across cell type family
Adrb2	0	0	1	None
Adrb3	2.15692e-09	0.248056	0.751944	None
Adrm1	0	0.515439	0.484561	High across location
Adsl	0.684928	0.226103	0.0889693	High across cell type family
Adss	0.887745	0.0746629	0.0375924	High across cell type family
Adssl1	0.788296	0.0211792	0.190525	High across cell type family
Adtrp	0	0.0835532	0.916447	None
Aebp1	0.925551	0.0483366	0.0261127	High across cell type family
Aebp2	0.846885	0.0136651	0.13945	High across cell type family
Aen	0.281033	0.503046	0.215922	Both to location and cell type
Afap1	0.527828	0.131546	0.340626	High across cell type family
Afap1l1	0.457854	0	0.542146	High across cell type family
Afap1l2	0.736147	0.129687	0.134165	High across cell type family
Aff1	0.738508	5.16878e-11	0.261492	High across cell type family
Aff2	0.807783	0	0.192217	High across cell type family
Aff3	0.855492	0.0285218	0.115986	High across cell type family
Aff4	0.608038	0.302833	0.0891287	Both to location and cell type
Afg3l1	0.378689	0.00543594	0.615875	High across cell type family
Afg3l2	0.449683	2.90191e-09	0.550317	High across cell type family
Afmid	0	0	1	None
Afp	0.69492	0.0883138	0.216766	High across cell type family
Aftph	0.947595	0.0247605	0.0276445	High across cell type family
Aga	0.825185	0	0.174815	High across cell type family
Agap1	0.802063	0.137357	0.0605798	High across cell type family
Agap2	0.872774	0.0081403	0.119086	High across cell type family
Agap3	0.953526	0.030426	0.0160479	High across cell type family
Agbl1	0.751591	4.06653e-10	0.248409	High across cell type family
Agbl2	0.515501	1.93062e-10	0.484499	High across cell type family
Agbl3	0.974129	2.41723e-10	0.0258713	High across cell type family
Agbl4	0.727695	0.129055	0.14325	High across cell type family
Agbl5	0.0559686	0	0.944031	None
Ager	0.787249	0.0306472	0.182104	High across cell type family
Agfg1	0.504105	0.159361	0.336534	High across cell type family
Agfg2	0	0.481361	0.518639	High across location
[truncated: 18,030 more rows]

## Sheet: Pvit.AST-GABA
Table S5. LMM results for lizard astrocytes-GABA.
[truncated: 18,645 more rows]

[truncated: 3 more sheets: Pvit.AST-Glut, Pmar.AST-GABA, Pmar.AST-Glut]
