# Supplementary material for: Whole genome duplication drove cell type evolution in the vertebrate brain
Source: Research Square preprint supplement (doi:10.21203/rs.3.rs-6965966/v1), 2025-07-04
Supplement: Supplementary file 7 [file 8278bf06f5c217e5196db756.xlsx]

## Sheet: S2-Pmar
Table S2-Pmar. Refined annotation on iterative clustering at cell type family and cell subtype level for lamprey.
Cluster	Cell number	Major labelling of reference	ratio of major labelling of reference	subtype labelling of reference	ratio of subtype labelling of reference	Refined family name	Refined subtype name	Notes
266	185	Photoreceptors	0.989189	Photo3	0.464865	Photoreceptor cells	Photo_266	Annotated as Parapineal Organ in Diencephalon in reference
99	314	Excitatory telencephalon	1	TeExc1	0.987261	Telencephalon glutamatergic neurons	TeExc_99	Annotated as Telencephalon; Dorsomedial Telencephalic Nucleus (DMTN) / Tufted-like cells of Glomerular layer OB (GLOB) in reference.
324	237	Immune	0.620253	Micro1	0.590717	Microglia	Microglia_324	Maps to microglia of other 3 species by SAMap and express relevant markers though it's mixed with few other neurons.
125	313	Habenular neurons	1	DeExc2	0.514377	Diencephalon glutamatergic neurons	DeExc_Habenular neurons_125	Not highly express choline acetyl-transferase (ChAT), MSTRG.7934; highly express SLC17A6/7
126	251	Habenular neurons	0.920319	DeExc2	0.478088	Diencephalon glutamatergic neurons	DeExc_Habenular neurons_126	Not highly express choline acetyl-transferase (ChAT), MSTRG.7934; highly express SLC17A6/7
189	351	Habenular neurons	0.994302	DeChol3	0.888889	Diencephalon glutamatergic neurons	DeChol_Habenular neurons_189	Express choline acetyl-transferase (ChAT), MSTRG.7934
190	180	Habenular neurons	1	DeChol3	0.983333	Diencephalon glutamatergic neurons	DeChol_Habenular neurons_190	Express choline acetyl-transferase (ChAT), MSTRG.7934
191	455	Habenular neurons	0.995604	DeChol3	0.69011	Diencephalon glutamatergic neurons	DeExc_Habenular neurons_191	Not highly express choline acetyl-transferase (ChAT), MSTRG.7934; highly express SLC17A6/7
194	338	Habenular neurons	0.997041	DeChol3	0.911243	Diencephalon glutamatergic neurons	DeExc_Habenular neurons_194	Not highly express choline acetyl-transferase (ChAT), MSTRG.7934; Not mapped to other Habenular neurons but grouped with habenular cells wihin lamprey; highly express SLC17A6/7
193	233	Habenular neurons	1	DeChol3	0.832618	Diencephalon glutamatergic neurons	DeChol_Habenular neurons_193	Express choline acetyl-transferase (ChAT), MSTRG.7934
195	144	Habenular neurons	1	DeChol3	1	Diencephalon glutamatergic neurons	DeChol_Habenular neurons_195	Express choline acetyl-transferase (ChAT), MSTRG.7934
95	500	Meningeal fibroblasts	0.238	Fibro1	0.222	Mixture	Mixture_95	Mixed with some neurons
97	122	Meningeal fibroblasts	0.459016	Fibro2	0.459016	Mixture	Mixture_97	Mixed with some neurons
124	104	Spinal cord/Rhombencephalon neurons	0.990385	ReInh2	0.682692	Rhombencephalon GABAergic neurons	ReInh_124
173	470	Astrocytes	0.193617	DeChol3	0.0574468	Mixture	Mixture_173	Mixed with many neurons
131	383	Inhibitory telencephalon	1	TeInh7	0.43342	Telencephalon GABAergic neurons	TeInh_LGE_131	Annotated in Olfactory bulb by reference; mapped to other species LGE-derived neurons by SAMap.
130	195	Inhibitory telencephalon	1	TeInh8	0.666667	Telencephalon GABAergic neurons	TeInh_LGE_130	Annotated in Olfactory bulb by reference; mapped to other species LGE/CGE-derived neurons by SAMap.
128	332	Inhibitory telencephalon	0.981928	TeInh8	0.858434	Telencephalon GABAergic neurons	TeInh_LGE_128	Annotated in Olfactory bulb by reference; mapped to other species LGE/CGE-derived neurons by SAMap.
129	398	Inhibitory telencephalon	1	TeDopa1	0.565327	Telencephalon GABAergic neurons	TeDopa_LGE_129	Annotated in Olfactory bulb by reference; express tyrosine hydroxylase (MSTRG.5560)
292	398	Inhibitory telencephalon	0.994975	TeInh8	0.71608	Telencephalon GABAergic neurons	TeInh_LGE_292
144	138	Excitatory telencephalon	1	TeExc2	0.985507	Telencephalon glutamatergic neurons	TeExc_144
138	126	Inhibitory mesencephalon	1	Meinh4	0.555556	Mesencephalon GABAergic neurons	MeInh_Optic Tectum_138	Optic Tectum; express Meis2; mapped to other species optic tectum.
139	221	Inhibitory mesencephalon	0.99095	MeInh3	0.520362	Mesencephalon GABAergic neurons	MeInh_Optic Tectum_139	Expressing Meis2, likely Optic Tectum
140	188	Inhibitory mesencephalon	0.994681	MeInh3	0.941489	Mesencephalon GABAergic neurons	MeInh_Optic Tectum_140	Expressing Meis2, likely Optic Tectum
167	116	Inhibitory mesencephalon	0.991379	MeInh9	0.637931	Mesencephalon GABAergic neurons	MeInh_167
154	144	Inhibitory mesencephalon	0.881944	MeInh6	0.527778	Mesencephalon GABAergic neurons	MeInh_154
172	454	Inhibitory mesencephalon	0.993392	MeInh5	0.352423	Mesencephalon GABAergic neurons	MeInh_172
156	335	Inhibitory mesencephalon	0.991045	MeInh7	0.435821	Mesencephalon GABAergic neurons	MeInh_156
171	284	Inhibitory mesencephalon	0.922535	MeInh7	0.577465	Mesencephalon GABAergic neurons	MeInh_171
169	236	Inhibitory mesencephalon	0.978814	MeInh1	0.313559	Mesencephalon GABAergic neurons	MeInh_169
170	154	Inhibitory mesencephalon	1	MeInh7	0.311688	Mesencephalon GABAergic neurons	MeInh_170
147	306	Spinal cord/Rhombencephalon neurons	0.777778	ReInh6	0.366013	Rhombencephalon GABAergic neurons	ReInh_Medulla_147	Annotated in Medulla by reference; mapped to other species Rhombencephalon neurons; lowly express SLC17A6/7
178	434	Excitatory telencephalon	0.382488	TeExc2	0.31106	Mixture	Mixture_178	Mixed with other types of neuron
149	266	Inhibitory telencephalon	0.973684	TeInh5	0.402256	Telencephalon GABAergic neurons	TeInh_MGE_149	Annotated in Striatum/Pallidum by reference; express LHX6/8 (MSTRG.10404) and GAL (MSTRG.5367); mapped to other species MGE by SAMap
150	260	Inhibitory telencephalon	0.9	TeInh3	0.207692	Telencephalon GABAergic neurons	TeInh_MGE_150	Not express LHX6/8 (MSTRG.10404) and GAL (MSTRG.5367), but map to MGE-derived neurons from other species
151	580	Inhibitory telencephalon	0.553448	TeInh4	0.106897	Telencephalon GABAergic neurons	TeInh_MGE_151	Express LHX6/8 (MSTRG.10404) and GAL (MSTRG.5367)
155	347	Inhibitory mesencephalon	0.435159	MeInh8	0.230548	Mesencephalon GABAergic neurons	MeInh_155	Mixed with some TeInh
283	1172	Inhibitory mesencephalon	0.437713	MeNeb1	0.0622867	Mixture	Mixture_283	Mixed with diverse cell types; low quality
142	188	Peptidergic	0.558511	DePep1	0.489362	Peptidergic neurons	DePep_142	Mixed with some TeExc
163	121	Excitatory dien-/mesencephalon	0.719008	DeExc5	0.661157	Diencephalon glutamatergic neurons	DeExc_Thalamus_163	Annotated in thalamus by reference; mapped to other species thalamus by SAMap.
141	477	Excitatory dien-/mesencephalon	0.918239	MeExc5	0.303983	Mesencephalon glutamatergic neurons	MeExc_Optic Tectum_141	Annotated in Optic Tectum by reference; mapped to lizard optic tectum by SAMap.
165	426	Inhibitory mesencephalon	0.457746	MeExc1	0.312207	Mesencephalon glutamatergic neurons	MeExc_165
164	196	Inhibitory mesencephalon	0.739796	DeNeb5	0.372449	Mesencephalon glutamatergic neurons	MeExc_164
158	241	Excitatory dien-/mesencephalon	0.788382	MeExc6	0.261411	Mesencephalon glutamatergic neurons	MeExc_158
166	622	Excitatory dien-/mesencephalon	0.700965	MeExc6	0.210611	Mesencephalon glutamatergic neurons	MeExc_166
136	130	Excitatory telencephalon	1	TeExc7	0.384615	Telencephalon glutamatergic neurons	TeExc_136
134	442	Excitatory telencephalon	0.970588	TeExc7	0.760181	Telencephalon glutamatergic neurons	TeExc_134
135	253	Excitatory telencephalon	1	TeExc5	0.505929	Telencephalon glutamatergic neurons	TeExc_135
145	235	Excitatory telencephalon	0.957447	TeExc3	0.714894	Telencephalon glutamatergic neurons	TeExc_145
132	389	Excitatory telencephalon	0.994859	TeExc4	0.840617	Telencephalon glutamatergic neurons	TeExc_132
146	223	Excitatory telencephalon	0.834081	TeExc4	0.286996	Telencephalon glutamatergic neurons	TeExc_146
290	728	Excitatory telencephalon	0.348901	DeChol3	0.153846	Mixture	Mixture_290	Mixed with many different neurons
281	210	Monoaminergic	0.642857	DeNeb1	0.361905	Dopaminergic neurons	DeDopa_281	Express tyrosine hydroxylase (MSTRG.5560)
176	207	Monoaminergic	0.937198	DeMono1	0.352657	Dopaminergic neurons	DeDopa_176	Express tyrosine hydroxylase (MSTRG.5560)
175	440	Monoaminergic	0.75	MeDopa1	0.275	Dopaminergic neurons	MeDopa_175	Express tyrosine hydroxylase (MSTRG.5560)
177	231	Monoaminergic	0.935065	DeMono3	0.380952	Dopaminergic neurons	DeDopa_177	Express tyrosine hydroxylase (MSTRG.5560); Also express SLC17A6/7 and some cells from Mesencephalon
182	154	Peptidergic	0.733766	DePep4	0.311688	Diencephalon GABAergic neurons	DeInh_182	coexpress peptidergic markers
181	226	Peptidergic	0.681416	DePep4	0.163717	Diencephalon GABAergic neurons	DeInh_181	coexpress peptidergic markers
185	238	Peptidergic	0.970588	DePep4	0.285714	Diencephalon GABAergic neurons	DeInh_185	coexpress peptidergic markers
187	199	Peptidergic	0.638191	DePep6	0.21608	Diencephalon GABAergic neurons	DeInh_187	coexpress peptidergic markers
180	249	Peptidergic	0.823293	DePep2	0.253012	Peptidergic neurons	DePep_180
186	262	Peptidergic	0.828244	DePep8	0.255725	Peptidergic neurons	DePep_186
197	113	Choroid plexus epithelium	1	Chor3	0.752212	Choroid plexus epithelial cells	ChorEpi_197
214	222	Choroid plexus epithelium	0.851351	Chor4	0.671171	Choroid plexus epithelial cells	ChorEpi_214
215	318	Choroid plexus epithelium	0.927673	Chor1	0.613208	Choroid plexus epithelial cells	ChorEpi_215
308	569	Astrocytes	1	MRAstro1	0.973638	Astrocytes	Ast_308
309	333	Astrocytes	0.936937	MRAstro1	0.882883	Astrocytes	Ast_309
216	208	Ependymal	0.990385	DePigm1	0.682692	Ependymal cells	Epen_216
217	118	Ependymal	0.983051	DePigm2	0.974576	Ependymal cells	Epen_217
222	336	Ependymal	0.997024	DeHypen1	0.991071	Ependymal cells	Epen_222
219	577	Ependymal	1	DeHypen1	1	Ependymal cells	Epen_219
221	450	Ependymal	1	DeHypen1	0.997778	Ependymal cells	Epen_221
223	112	Ependymal	1	ReEpen1	1	Ependymal cells	Epen_223
252	196	Astrocytes	0.994898	DeAstro1	0.80102	Astrocytes	Ast_252
261	668	Astrocytes	1	DMAstro1	0.640719	Astrocytes	Ast_261
238	193	Astrocytes	0.528497	DeEpen1	0.186528	Astrocytes	Ast_238
263	265	Astrocytes	0.6	PeAstro2	0.237736	Astrocytes	Ast_263
258	308	Astrocytes	0.886364	ReAstro1	0.243506	Astrocytes	Ast_258
253	303	Astrocytes	0.9967	PeAstro2	0.881188	Astrocytes	Ast_253
254	1340	Astrocytes	0.985075	PeAstro1	0.848507	Astrocytes	Ast_254
240	201	Astrocytes	0.985075	PeAstro2	0.676617	Astrocytes	Ast_240
256	382	Astrocytes	0.921466	PeAstro2	0.727749	Astrocytes	Ast_256
259	869	Astrocytes	0.965478	MRAstro2	0.828539	Astrocytes	Ast_259
224	191	Astrocytes	0.994764	PeAstroepen1	0.994764	Astrocytes	Ast_224
231	361	Astrocytes	0.99169	DeAstroepen2	0.628809	Astrocytes	Ast_231
232	211	Astrocytes	0.952607	DeAstroepen1	0.616114	Astrocytes	Ast_232
230	164	Ependymal	0.902439	TeEpen1	0.457317	Ependymal cells	Epen_230
229	372	Ependymal	0.978495	TeEpen1	0.518817	Ependymal cells	Epen_229
226	318	Ependymal	0.993711	DeEpen4	0.918239	Ependymal cells	Epen_226
228	323	Ependymal	0.993808	DeEpen4	0.959752	Ependymal cells	Epen_228
225	168	Ependymal	1	DeEpen5	0.660714	Ependymal cells	Epen_225
237	295	Ependymal	0.99661	DMEpen1	0.474576	Ependymal cells	Epen_237
304	180	Ependymal	0.972222	DMEpen1	0.433333	Ependymal cells	Epen_304
235	181	Ependymal	1	DMEpen1	1	Ependymal cells	Epen_235
236	132	Ependymal	1	DMEpen1	0.659091	Ependymal cells	Epen_236
233	238	Ependymal	0.836134	MREpen1	0.466387	Ependymal cells	Epen_233
305	877	Ependymal	0.537058	DeHypen1	0.156214	Ependymal cells	Epen_305
301	4904	Erythrocytes	0.986134	Erythro1	0.973083	Erythrocytes	Erythrocytes_301	Confirmed by markers and GO enrichment results on top DEGs (not shown)
297	131	Immune	0.847328	Lympho1	0.267176	Microglia	Microglia_297	Express Vlra+ (MSTRG.16587)
295	194	Immune	0.974227	Micro1	0.670103	Microglia	Microglia_295
312	547	Immune	0.945155	Micro1	0.91042	Microglia	Microglia_312
314	310	Immune	0.977419	Micro1	0.909677	Microglia	Microglia_314
296	378	Immune	0.992063	Micro1	0.92328	Microglia	Microglia_296
318	1440	Immune	1	Micro1	0.995139	Microglia	Microglia_318
321	524	Immune	0.998092	Micro1	0.992366	Microglia	Microglia_321
2	263	Vascular	0.988593	Vasc1	0.646388	Vascular cells	Vasc_2
5	158	Vascular	1	Vasc3	0.936709	Vascular cells	Vasc_5
6	230	Vascular	0.995652	Vasc4	0.973913	Vascular cells	Vasc_6
3	383	Vascular	0.986945	Vasc3	0.827676	Vascular cells	Vasc_3
4	131	Vascular	1	Vasc3	0.78626	Vascular cells	Vasc_4
37	121	Vascular	0.479339	Vasc5	0.479339	Vascular cells	Vasc_37
15	644	Meningeal fibroblasts	0.968944	Fibro2	0.560559	Fibroblasts	Fibro_15
27	1370	Meningeal fibroblasts	1	Fibro2	1	Fibroblasts	Fibro_27
30	584	Meningeal fibroblasts	0.965753	Fibro2	0.916096	Fibroblasts	Fibro_30
26	707	Meningeal fibroblasts	0.990099	Fibro2	0.988685	Fibroblasts	Fibro_26
23	754	Meningeal fibroblasts	1	Fibro2	1	Fibroblasts	Fibro_23
33	968	Meningeal fibroblasts	0.996901	Fibro2	0.996901	Fibroblasts	Fibro_33
93	321	Meningeal fibroblasts	0.277259	Fibro1	0.255452	Mixture	Mixture_93
58	285	Meningeal fibroblasts	1	Fibro3	0.550877	Fibroblasts	Fibro_58
59	616	Meningeal fibroblasts	0.977273	Fibro1	0.941558	Fibroblasts	Fibro_59
66	226	Meningeal fibroblasts	0.982301	Fibro1	0.973451	Fibroblasts	Fibro_66
67	374	Meningeal fibroblasts	0.989305	Fibro1	0.839572	Fibroblasts	Fibro_67
64	215	Meningeal fibroblasts	0.981395	Fibro3	0.888372	Fibroblasts	Fibro_64
70	665	Meningeal fibroblasts	0.995489	Fibro1	0.995489	Fibroblasts	Fibro_70
83	466	Meningeal fibroblasts	0.995708	Fibro1	0.995708	Fibroblasts	Fibro_83
61	256	Meningeal fibroblasts	0.988281	Fibro1	0.953125	Fibroblasts	Fibro_61
62	1579	Meningeal fibroblasts	0.9943	Fibro1	0.9867	Fibroblasts	Fibro_62
63	491	Meningeal fibroblasts	0.991853	Fibro1	0.96945	Fibroblasts	Fibro_63
60	392	Meningeal fibroblasts	0.994898	Fibro1	0.982143	Fibroblasts	Fibro_60
73	215	Meningeal fibroblasts	1	Fibro1	0.995349	Fibroblasts	Fibro_73
76	1077	Meningeal fibroblasts	0.991643	Fibro1	0.987001	Fibroblasts	Fibro_76
78	1198	Meningeal fibroblasts	0.992487	Fibro1	0.949917	Fibroblasts	Fibro_78
80	986	Meningeal fibroblasts	0.998986	Fibro1	0.944219	Fibroblasts	Fibro_80
85	275	Meningeal fibroblasts	0.996364	Fibro1	0.996364	Fibroblasts	Fibro_85
86	437	Meningeal fibroblasts	1	Fibro1	1	Fibroblasts	Fibro_86
87	640	Meningeal fibroblasts	0.998437	Fibro1	0.998437	Fibroblasts	Fibro_87
82	1267	Meningeal fibroblasts	0.998421	Fibro1	0.998421	Fibroblasts	Fibro_82
89	1038	Meningeal fibroblasts	0.998073	Fibro1	0.99711	Fibroblasts	Fibro_89
90	314	Meningeal fibroblasts	0.923567	Fibro1	0.917197	Fibroblasts	Fibro_90
81	481	Meningeal fibroblasts	0.997921	Fibro1	0.997921	Fibroblasts	Fibro_81
91	240	Meningeal fibroblasts	0.983333	Fibro1	0.983333	Fibroblasts	Fibro_91

## Sheet: S2-Pvit
Table S2-Pvit. Refined annotation on iterative clustering at cell type family and cell subtype level for Bearded dragon.
Cluster	Cell number	Major labelling of reference	ratio of Major labelling of reference	subtype labelling of reference	ratio of subtype labelling of reference	Refined family	Refined subtype	Notes
298	244	EG-CB	0.860656	EG-CB	0.860656	Astrocytes	Ast_298	Not clustered with other astrocytes, marker expression patterns were not very like Ast;
291	322	CBGABA	0.984472	CBGABA2	0.981366	Rhombencephalon GABAergic neurons	ReInh_291	Annotated in Cerebellum by reference
295	247	NEUR	0.607287	NEUR	0.607287	Rhombencephalon glutamatergic neurons	ReExc_295	Mapped to cerebellum granule neurons by SAMap
296	3449	CBGLUT	0.936213	CBGLUT4	0.418092	Rhombencephalon glutamatergic neurons	ReExc_Cerebellum granule cells_296	Annotated as cerebellum granule cells by reference; Mapped to cerebellum granule neurons by SAMap.
297	466	CBGLUT	0.997854	CBGLUT2	0.939914	Rhombencephalon glutamatergic neurons	ReExc_Cerebellum granule cells_297	Annotated as cerebellum granule cells by reference; Mapped to cerebellum granule neurons by SAMap.
27	188	DIGLUT	0.569149	DIGLUT40	0.239362	Diencephalon glutamatergic neurons	DeExc_Habenular neurons_27	Mapped to other Habenular neurons by SAMap
28	207	DICHOL	0.966184	DICHOL3	0.966184	Diencephalon glutamatergic neurons	DeExc_Habenular neurons_28	Also express choline acetyl-transferase (ChAT); Mapped to other Habenular neurons by SAMap.
24	307	DIGLUT	0.990228	DIGLUT43	0.938111	Diencephalon glutamatergic neurons	DeExc_Habenular neurons_24	Mapped to other Habenular neurons by SAMap
467	390	DICHOL	0.566667	DICHOL2	0.558974	Diencephalon glutamatergic neurons	DeExc_Habenular neurons_467	Also express choline acetyl-transferase (ChAT); Mapped to other Habenular neurons by SAMap.
463	1100	DIGLUT	0.530909	NEUR	0.379091	Diencephalon glutamatergic neurons	DeExc_Habenular neurons_463
25	211	DICHOL	0.919431	DICHOL1	0.815166	Diencephalon glutamatergic neurons	DeExc_Habenular neurons_25	Mapped to other Habenular neurons by SAMap
26	227	DICHOL	0.876652	DICHOL1	0.872247	Diencephalon glutamatergic neurons	DeExc_Habenular neurons_26	Mapped to other Habenular neurons by SAMap
180	740	TEGABA	0.372973	NEUR	0.260811	Telencephalon glutamatergic neurons	TeExc_180
117	553	TEGLUT	0.650995	TEGLUT26	0.424955	Telencephalon glutamatergic neurons	TeExc_117	Annotated in Pallium by reference
119	830	TEGLUT	0.691566	TEGLUT7	0.237349	Telencephalon glutamatergic neurons	TeExc_119	Annotated in Pallium aDVR by reference
96	226	TEGLUT	0.942478	TEGLUT5	0.446903	Telencephalon glutamatergic neurons	TeExc_96	Annotated in Pallium aDVR by reference
126	337	TEGLUT	0.95549	TEGLUT12	0.620178	Telencephalon glutamatergic neurons	TeExc_126	Annotated in Pallium Amygdala by reference
485	1962	NEUR	0.648828	NEUR	0.648828	Telencephalon glutamatergic neurons	TeExc_485
127	445	TEGLUT	0.986517	TEGLUT19	0.330337	Telencephalon glutamatergic neurons	TeExc_127	Annotated in Pallium by reference
138	889	TEGLUT	0.893138	TEGLUT17	0.286839	Telencephalon glutamatergic neurons	TeExc_138	Annotated in Pallium by reference
122	389	TEGLUT	0.838046	TEGLUT11	0.311054	Telencephalon glutamatergic neurons	TeExc_122	Annotated in Pallium Amygdala by reference
140	273	TEGLUT	0.809524	TEGLUT13	0.564103	Telencephalon glutamatergic neurons	TeExc_140	Annotated in Pallium by reference
139	438	TEGLUT	0.942922	TEGLUT22	0.803653	Telencephalon glutamatergic neurons	TeExc_139	Annotated in Pallium by reference
124	356	TEGLUT	0.853933	TEGLUT23	0.275281	Telencephalon glutamatergic neurons	TeExc_124	Annotated in Pallium by reference
125	345	TEGLUT	0.953623	TEGLUT25	0.423188	Telencephalon glutamatergic neurons	TeExc_125	Annotated in Pallium by reference
118	232	TEGLUT	0.801724	TEGLUT1	0.698276	Telencephalon glutamatergic neurons	TeExc_118	Annotated in Pallium Amygdala by reference
121	429	TEGLUT	0.969697	TEGLUT2	0.501166	Telencephalon glutamatergic neurons	TeExc_121	Annotated in nucleus of anterior commissure by reference
120	227	TEGLUT	0.757709	TEGLUT5	0.370044	Telencephalon glutamatergic neurons	TeExc_120	Annotated in Pallium aDVR by reference
143	290	TEGLUT	0.982759	TEGLUT8	0.917241	Telencephalon glutamatergic neurons	TeExc_143	Annotated in Pallium DVR by reference
503	7624	NEUR	0.851915	NEUR	0.851915	Telencephalon glutamatergic neurons	TeExc_503
144	449	TEGLUT	0.926503	TEGLUT10	0.407572	Telencephalon glutamatergic neurons	TeExc_144	Annotated in Pallium DVR by reference
142	304	TEGLUT	0.9375	TEGLUT9	0.523026	Telencephalon glutamatergic neurons	TeExc_142	Annotated in Pallium by reference
145	530	TEGLUT	0.618868	TEGLUT9	0.286792	Telencephalon glutamatergic neurons	TeExc_145	Annotated in Pallium by reference
178	347	TEGABA	0.752161	TEGABA13	0.204611	Telencephalon GABAergic neurons	TeInh_MGE_178	Annotated in SubPallium by reference; Mapped to CGE-derived neurons.
179	355	TEGABA	0.687324	TEGABA6	0.321127	Telencephalon GABAergic neurons	TeInh_MGE_179	Annotated in SubPallium by reference; Mapped to MGE-derived neurons.
258	320	NEUR	0.484375	NEUR	0.484375	Mixture	Mixture_258	Mixed with some glial cells
192	349	NEUR	0.862464	NEUR	0.862464	Mixture	Mixture_192	Unknown and not express many markers
184	290	DIGLUT	0.762069	DIGLUT22	0.341379	Diencephalon glutamatergic neurons	DeExc_Thalamus_184	Annotated in thalamus
186	464	NEUR	0.678879	NEUR	0.678879	Diencephalon glutamatergic neurons	DeExc_186	Expression similar to DeExc_Thalamus_184
185	636	DIGLUT	0.455975	NEUR	0.451258	Diencephalon glutamatergic neurons	DeExc_185	Expression similar to DeExc_Thalamus_184
182	2842	NEUR	0.662913	NEUR	0.662913	Mixture	Mixture_182	Mixed with many different subtypes of neuron and some glial cells
193	3088	NEUR	0.697215	NEUR	0.697215	Mixture	Mixture_193	Unknown and not express many markers
194	208	DIGABA	0.860577	DIGABA2	0.625	Diencephalon GABAergic neurons	DeInh_Hypothalamus_194	Annotated as Suprachiasmatic nucleus in hypothalamus by reference
61	291	DIGABA	0.436426	DIGABA3	0.274914	Diencephalon GABAergic neurons	DeInh_61
204	338	TEGABA	0.863905	TEGABA7	0.41716	Telencephalon GABAergic neurons	TeInh_MGE_204	Annotated in SubPallium by reference; Mapped to MGE-derived neurons by SAMap.
30	384	TEGABA	0.882812	TEGABA6	0.354167	Telencephalon GABAergic neurons	TeInh_MGE_30	Annotated in SubPallium by reference; Mapped to MGE-derived neurons by SAMap.
206	217	TEGABA	0.97235	TEGABA12	0.9447	Telencephalon GABAergic neurons	TeInh_MGE_206	Annotated in SubPallium by reference; Mapped to MGE-derived neurons by SAMap.
56	325	TEGABA	0.981538	TEGABA12	0.483077	Telencephalon GABAergic neurons	TeInh_MGE_56	Annotated in SubPallium by reference; Mapped to MGE-derived neurons by SAMap.
205	276	TEGABA	0.927536	TEGABA5	0.384058	Telencephalon GABAergic neurons	TeInh_MGE_205	Annotated in SubPallium by reference; Mapped to MGE-derived neurons by SAMap.
504	294	NEUR	0.70068	NEUR	0.70068	Telencephalon GABAergic neurons	TeInh_MGE_504	Mapped to some MGE/CGE/LGE neurons.
58	157	TEGABA	1	TEGABA14	0.77707	Telencephalon GABAergic neurons	TeInh_MGE_58	Annotated in SubPallium by reference
57	280	TEGABA	0.960714	TEGABA9	0.575	Telencephalon GABAergic neurons	TeInh_CGE_57	Annotated in SubPallium by reference
202	451	TEGABA	0.926829	TEGABA9	0.323725	Telencephalon GABAergic neurons	TeInh_CGE_202	Annotated in SubPallium by reference
497	824	NEUR	0.743932	NEUR	0.743932	Telencephalon GABAergic neurons	TeInh_CGE_497	Express CCK and similar to CGE Ins
285	286	NEUR	0.713287	NEUR	0.713287	Mixture	Mixture_285	Mixed with some OPCs
288	1039	NEUR	0.47257	NEUR	0.47257	Mixture	Mixture_288	Mixed with many OPCs
198	304	MEGABA	0.973684	MEGABA8	0.315789	Mesencephalon GABAergic neurons	MeInh_Optic Tectum_198	Annotated in Optic Tectum by reference; Mapped to other optic tectum neurons by SAMap.
200	207	MEGABA	0.980676	MEGABA11	0.584541	Mesencephalon GABAergic neurons	MeInh_Optic Tectum_200	Annotated in Optic Tectum by reference
201	406	MEGABA	0.965517	MEGABA10	0.495074	Mesencephalon GABAergic neurons	MeInh_Optic Tectum_201	Annotated in Optic Tectum by reference
196	740	MEGABA	0.935135	MEGABA17	0.318919	Mesencephalon GABAergic neurons	MeInh_196	Annotated in Tegmentum by reference
470	676	NEUR	0.721893	NEUR	0.721893	Mesencephalon GABAergic neurons	MeInh_470	Mixed with MeInh and similar to MeInh
212	672	MEGABA	0.989583	MEGABA20	0.647321	Mesencephalon GABAergic neurons	MeInh_Optic Tectum_212	Annotated in Optic Tectum by reference
237	351	MEGABA	0.962963	MEGABA20	0.276353	Mesencephalon GABAergic neurons	MeInh_Optic Tectum_237	Annotated in Optic Tectum by reference
214	284	MEGLUT	0.901408	MEGLUT5	0.68662	Mesencephalon glutamatergic neurons	MeExc_Optic Tectum_214	Annotated in Optic Tectum by reference; Mapped to other optic tectum neurons by SAMap.
188	460	NEUR	0.632609	NEUR	0.632609	Mesencephalon GABAergic neurons	MeInh_188	Mixed with MeInh and similar to MeInh
255	645	MEGABA	0.950388	MEGABA25	0.477519	Mesencephalon GABAergic neurons	MeInh_Optic Tectum_255	Annotated in Optic Tectum by reference
234	3409	MEGLUT	0.544735	NEUR	0.11851	Mesencephalon glutamatergic neurons	MeExc_234
249	1416	MEGABA	0.908192	MEGABA32	0.195621	Mesencephalon GABAergic neurons	MeInh_249
62	484	MEGABA	0.516529	MEGABA10	0.0847107	Mesencephalon GABAergic neurons	MeInh_62
63	354	NEUR	0.333333	NEUR	0.333333	Mixture	Mixture_63	Mixed with many different subtypes of neuron and some glial cells
131	290	TEGABA	0.789655	TEGABA19	0.565517	Telencephalon GABAergic neurons	TeInh_LGE_131	Annotated in SubPallium by reference; Mapped to LGE-derived neurons from other species by SAMap.
135	417	TEGABA	0.582734	TEGABA20	0.18705	Telencephalon GABAergic neurons	TeInh_LGE_135	Annotated in SubPallium by reference; Mapped to LGE-derived neurons from other species by SAMap.
137	475	TEGABA	0.892632	TEGABA17	0.410526	Telencephalon GABAergic neurons	TeInh_LGE_137	Annotated in SubPallium by reference; Mapped to LGE-derived neurons from other species by SAMap.
129	540	TEGABA	0.82963	TEGABA24	0.357407	Telencephalon GABAergic neurons	TeInh_129
134	916	TEGABA	0.490175	NEUR	0.141921	Telencephalon GABAergic neurons	TeInh_134	Mixed with some other neurons; Mapped to LGE-derived neurons.
136	428	TEGABA	0.310748	DIGABA20	0.133178	Telencephalon GABAergic neurons	TeInh_136	Mapped to LGE-derived neurons.
208	284	DIGLUT	0.894366	DIGLUT12	0.264085	Diencephalon glutamatergic neurons	DeExc_208
80	297	DIGLUT	0.912458	DIGLUT15	0.181818	Diencephalon glutamatergic neurons	DeExc_80
81	596	DIGLUT	0.822148	DIGLUT17	0.204698	Diencephalon glutamatergic neurons	DeExc_81
147	362	DIGLUT	0.558011	NEUR	0.436464	Diencephalon glutamatergic neurons	DeExc_147
59	415	DIGLUT	0.968675	DIGLUT19	0.501205	Diencephalon glutamatergic neurons	DeExc_Thalamus_59	Annotated in thalamus by reference; Mapped to thalamus neurons by SAMap.
195	480	DIGLUT	0.99375	DIGLUT19	0.75	Diencephalon glutamatergic neurons	DeExc_Thalamus_195	Annotated in thalamus by reference; Mapped to thalamus and hypothalamus neurons by SAMap.
492	654	NEUR	0.602446	NEUR	0.602446	Diencephalon glutamatergic neurons	DeExc_492
222	390	DIGLUT	0.766667	DIGLUT50	0.315385	Diencephalon glutamatergic neurons	DeExc_Hypothalamus_222	Annotated in hypothalamus by reference
207	346	DIGLUT	0.881503	DIGLUT50	0.618497	Diencephalon glutamatergic neurons	DeExc_Hypothalamus_207	Annotated in hypothalamus by reference
60	354	DIGLUT	0.932203	DIGLUT50	0.601695	Diencephalon glutamatergic neurons	DeExc_Hypothalamus_60	Annotated in hypothalamus by reference
67	696	DIGABA	0.599138	DIGABA11	0.122126	Diencephalon GABAergic neurons	DeInh_67
68	518	DIGLUT	0.546332	DIGLUT54	0.167954	Diencephalon glutamatergic neurons	DeExc_68
70	472	DIGABA	0.792373	DIGABA23	0.188559	Diencephalon glutamatergic neurons	DeExc_70
71	245	DIGABA	0.518367	TEGABA24	0.204082	Mixture	Mixture_71	Mixed with other neurons
209	1521	MEGABA	0.568047	MEGABA41	0.105194	Mesencephalon GABAergic neurons	MeInh_209
65	576	MEGABA	0.616319	MEGABA42	0.123264	Mesencephalon GABAergic neurons	MeInh_65
228	1082	MEGABA	0.323475	NEUR	0.204251	Mesencephalon GABAergic neurons	MeInh_228
66	648	MEGABA	0.881173	MEGABA2	0.152778	Mesencephalon GABAergic neurons	MeInh_66
240	1311	MEGABA	0.563692	NEUR	0.211289	Mesencephalon GABAergic neurons	MeInh_240
216	2149	MEGABA	0.396929	NEUR	0.0767799	Mesencephalon GABAergic neurons	MeInh_216
479	25898	NEUR	0.663449	NEUR	0.663449	Mixture	Mixture_479	Mixed with many different subtypes of neuron and some glial cells
64	307	DIGABA	0.644951	DIGABA30	0.449511	Diencephalon GABAergic neurons	DeInh_64
230	270	DIGABA	0.562963	DIGABA26	0.325926	Diencephalon GABAergic neurons	DeInh_230
73	511	DIGABA	0.67319	DIGABA26	0.295499	Diencephalon GABAergic neurons	DeInh_73
78	632	DIGABA	0.585443	DIGABA33	0.232595	Diencephalon GABAergic neurons	DeInh_78
72	467	DIGABA	0.51606	DIGABA33	0.130621	Diencephalon GABAergic neurons	DeInh_72
75	524	DIGABA	0.503817	DIGABA17	0.0801527	Diencephalon GABAergic neurons	DeInh_75
233	274	TEGLUT	0.430657	TEGLUT29	0.259124	Diencephalon glutamatergic neurons	DeExc_233
87	248	DIGLUT	0.479839	TEGLUT27	0.229839	Diencephalon glutamatergic neurons	DeExc_87
232	329	DIGLUT	0.653495	DIGLUT31	0.173252	Diencephalon glutamatergic neurons	DeExc_232
89	496	DIGLUT	0.741935	DIGLUT31	0.193548	Diencephalon glutamatergic neurons	DeExc_89
86	294	DIGLUT	0.829932	DIGLUT4	0.241497	Diencephalon glutamatergic neurons	DeExc_86
88	650	DIGLUT	0.623077	DIGLUT24	0.0692308	Diencephalon glutamatergic neurons	DeExc_88
83	330	DIGLUT	0.509091	MEGABA40	0.190909	Diencephalon glutamatergic neurons	DeExc_83
210	1343	DIGLUT	0.487714	NEUR	0.156366	Diencephalon glutamatergic neurons	DeExc_210
82	1582	DIGLUT	0.470923	NEUR	0.0840708	Diencephalon glutamatergic neurons	DeExc_82
225	1261	DIGLUT	0.58525	DIGLUT38	0.116574	Diencephalon glutamatergic neurons	DeExc_225
226	402	DIGLUT	0.768657	DIGLUT15	0.268657	Diencephalon glutamatergic neurons	DeExc_226
273	208	MCGLIA	0.817308	MCGLIA	0.817308	Microglia	Microglia_273
92	662	MCGLIA	0.79003	MCGLIA	0.79003	Mixture	Mixture_92	Mixed with some neurons and express neural markers
94	369	MCGLIA	0.95664	MCGLIA	0.95664	Microglia	Microglia_94
272	366	OLIG	0.833333	OLIG	0.833333	Mixture	Mixture_272	Mixed with some neurons and express neural markers
270	355	OLIG	0.923944	OLIG	0.923944	Mixture	Mixture_270	Mixed with some neurons and express neural markers
264	2315	OLIG	0.658747	OLIG	0.658747	Mixture	Mixture_264	Mixed with some neurons and express neural markers
490	983	OLIG	0.512716	OLIG	0.512716	Mixture	Mixture_490	Mixed with some neurons and express neural markers
275	478	EG	0.552301	EG	0.552301	Mixture	Mixture_275	Mixed with some neurons and express neural markers
281	431	NEUR	0.570766	NEUR	0.570766	Mixture	Mixture_281	Mixed with some neurons and express neural markers
282	205	NEUR	0.712195	NEUR	0.712195	Mixture	Mixture_282	Mixed with some neurons and express neural markers
279	327	EG	0.767584	EG	0.767584	Mixture	Mixture_279	Mixed with some neurons and express neural markers
283	376	NEUR	0.393617	NEUR	0.393617	Mixture	Mixture_283	Mixed with some neurons and express neural markers
489	956	EG	0.562762	EG	0.562762	Mixture	Mixture_489	Mixed with some neurons and express neural markers
517	182	DISECR	0.593407	DISECR3	0.593407	Diencephalon neurons	DeN_Pituitary gland_517	annotated as Pituitary gland
519	397	NPC	0.959698	NPC	0.959698	Neural progenitor cells	NPC_519
521	766	NPC	0.765013	NPC	0.765013	Neural progenitor cells	NPC_521
520	262	NPC	0.736641	NPC	0.736641	Neural progenitor cells	NPC_520
570	472	NPC	0.298729	NPC	0.298729	Mixture	Mixture_570	Mixed with glial and neural cells
551	404	JCHAIN	0.905941	JCHAIN	0.905941	Immune cells	Imm_551	Annotated as plasma cells
552	205	JCHAIN	0.907317	JCHAIN	0.907317	Immune cells	Imm_552	Annotated as plasma cells
453	305	MCGLIA	0.95082	MCGLIA	0.95082	Microglia	Microglia_453
452	1147	MCGLIA	0.996513	MCGLIA	0.996513	Microglia	Microglia_452
454	366	MCGLIA	1	MCGLIA	1	Microglia	Microglia_454
448	560	MCGLIA	0.994643	MCGLIA	0.994643	Microglia	Microglia_448
457	3607	MCGLIA	0.996396	MCGLIA	0.996396	Microglia	Microglia_457
549	281	END	1	END	1	Vascular cells	Vasc_549
555	313	VEND	0.996805	VEND	0.996805	Vascular cells	Vasc_555
556	254	VSMC	0.988189	VSMC	0.988189	Vascular cells	Vasc_556
550	328	CH-P	1	CH-P	1	Choroid plexus epithelial cells	ChorEpi_550
2	854	SCO	0.9637	SCO	0.9637	Ependymal cells	Epen_2
4	793	SCO	0.996217	SCO	0.996217	Ependymal cells	Epen_4
553	1221	SCO	0.997543	SCO	0.997543	Ependymal cells	Epen_553
558	214	MCGLIA	0.981308	MCGLIA	0.981308	Microglia	Microglia_558
571	320	MCGLIA	0.871875	MCGLIA	0.871875	Microglia	Microglia_571
301	1343	EG-CB	0.98064	EG-CB	0.98064	Astrocytes	Ast_301	Annotated as Bergmann glia by reference.
328	218	EG	0.793578	EG	0.793578	Astrocytes	Ast_328
351	426	EG	0.690141	EG	0.690141	Mixture	Mixture_351	Mixed with OPCs
356	554	EG	0.83935	EG	0.83935	Astrocytes	Ast_356
337	344	EG	0.994186	EG	0.994186	Astrocytes	Ast_337
319	608	EG	0.990132	EG	0.990132	Astrocytes	Ast_319
321	293	EG	0.989761	EG	0.989761	Astrocytes	Ast_321
349	1331	EG	0.997746	EG	0.997746	Astrocytes	Ast_349
353	713	EG	0.98317	EG	0.98317	Astrocytes	Ast_353
354	5800	EG	0.990862	EG	0.990862	Astrocytes	Ast_354
316	425	NEUR	0.964706	NEUR	0.964706	Mixture	Mixture_316	Similar to Ast and express relevant markers, but better exclude
317	546	NEUR	0.985348	NEUR	0.985348	Mixture	Mixture_317	Similar to Ast and express relevant markers, but better exclude
327	276	EG	1	EG	1	Astrocytes	Ast_327
315	236	EG	0.877119	EG	0.877119	Astrocytes	Ast_315
324	1102	EG	0.952813	EG	0.952813	Astrocytes	Ast_324
322	914	EG	0.962801	EG	0.962801	Astrocytes	Ast_322
323	930	EG	0.998925	EG	0.998925	Astrocytes	Ast_323
352	1859	EG	0.956966	EG	0.956966	Astrocytes	Ast_352
326	258	EG	0.992248	EG	0.992248	Astrocytes	Ast_326
334	551	EG	0.99637	EG	0.99637	Astrocytes	Ast_334
358	9710	EG	0.948507	EG	0.948507	Astrocytes	Ast_358
577	2101	EG	0.97049	EG	0.97049	Astrocytes	Ast_577
329	335	EG	0.979104	EG	0.979104	Astrocytes	Ast_329
331	1116	EG	0.971326	EG	0.971326	Astrocytes	Ast_331
335	916	EG	0.997817	EG	0.997817	Astrocytes	Ast_335
406	426	MCGLIA	0.946009	MCGLIA	0.946009	Mixture	Mixture_406	coexpressing markers for Oligodendrocytes and microglia; better exclude
422	389	OLIG	0.979434	OLIG	0.979434	Oligodendrocytes	Oligo_422
444	550	OLIG	0.934545	OLIG	0.934545	Oligodendrocytes	Oligo_444
443	843	OLIG	0.835113	OLIG	0.835113	Oligodendrocytes	Oligo_443
445	426	OLIG	0.899061	OLIG	0.899061	Oligodendrocytes	Oligo_445
404	254	DIFF-OPC	0.96063	DIFF-OPC	0.96063	Oligodendrocytes	Oligo_404	To simpify, annotated as Oligodendrocytes
419	243	DIFF-OPC	0.860082	DIFF-OPC	0.860082	Oligodendrocytes	Oligo_419	To simpify, annotated as Oligodendrocytes
420	580	DIFF-OPC	0.701724	DIFF-OPC	0.701724	Oligodendrocytes	Oligo_420	To simpify, annotated as Oligodendrocytes
382	575	OLIG	0.893913	OLIG	0.893913	Oligodendrocytes	Oligo_382
393	814	OLIG	0.998771	OLIG	0.998771	Oligodendrocytes	Oligo_393
440	1264	OLIG	0.988924	OLIG	0.988924	Oligodendrocytes	Oligo_440
424	3978	OLIG	0.999749	OLIG	0.999749	Oligodendrocytes	Oligo_424
397	5085	OLIG	0.968732	OLIG	0.968732	Oligodendrocytes	Oligo_397
430	4371	OLIG	0.996568	OLIG	0.996568	Oligodendrocytes	Oligo_430
408	170	OLIG	1	OLIG	1	Oligodendrocytes	Oligo_408
436	266	OLIG	0.898496	OLIG	0.898496	Oligodendrocytes	Oligo_436
405	234	DIFF-OPC	1	DIFF-OPC	1	Oligodendrocytes	Oligo_405	To simpify, annotated as Oligodendrocytes
389	531	DIFF-OPC	0.979284	DIFF-OPC	0.979284	Oligodendrocytes	Oligo_389	To simpify, annotated as Oligodendrocytes
401	888	DIFF-OPC	0.881757	DIFF-OPC	0.881757	Oligodendrocytes	Oligo_401	To simpify, annotated as Oligodendrocytes
387	183	DIFF-OPC	1	DIFF-OPC	1	Oligodendrocytes	Oligo_387	To simpify, annotated as Oligodendrocytes
388	298	DIFF-OPC	0.996644	DIFF-OPC	0.996644	Oligodendrocytes	Oligo_388	To simpify, annotated as Oligodendrocytes
546	415	CYCL-CEL	0.949398	CYCL-CEL	0.949398	Mixture	Mixture_546	cycling cells, exclude
539	7610	OPC	0.914323	OPC	0.914323	Oligodendrocyte precursor cells	OPC_539
376	5199	OPC	0.971918	OPC	0.971918	Oligodendrocyte precursor cells	OPC_376
363	4037	OPC	0.946	OPC	0.946	Oligodendrocyte precursor cells	OPC_363
379	3109	OPC	0.956899	OPC	0.956899	Oligodendrocyte precursor cells	OPC_379
378	280	DIFF-OPC	0.660714	DIFF-OPC	0.660714	Oligodendrocytes	Oligo_378	To simpify, annotated as Oligodendrocytes
371	306	DIFF-OPC	0.617647	DIFF-OPC	0.617647	Oligodendrocytes	Oligo_371	To simpify, annotated as Oligodendrocytes
523	514	DIFF-OPC	0.785992	DIFF-OPC	0.785992	Oligodendrocytes	Oligo_523	To simpify, annotated as Oligodendrocytes

## Sheet: S2-Mmus
Table S2-Mmus. Refined annotation on iterative clustering at cell type family and cell subtype level for mice.
Cluster	Cell number	Major labelling of reference	ratio of Major labelling of reference	subtype labelling of reference	ratio of subtype labelling of reference	Refined family	Refined subtype	Notes
55	283	Cerebellum neurons	0.957597	CBGRC	0.95053	Rhombencephalon glutamatergic neurons	ReExc_Cerebellum granule neurons_55	Annotated in cerebellum by reference; mapped to Cerebellum granule neurons from other species by SAMap.
84	439	Cerebellum neurons	1	CBINH1	0.883827	Rhombencephalon GABAergic neurons	ReInh_84	Annotated in cerebellum by reference
89	313	Cerebellum neurons	0.872204	CBINH1	0.693291	Rhombencephalon GABAergic neurons	ReInh_89	Annotated in cerebellum by reference
289	120	Glutamatergic neuroblasts	1	OBNBL2	0.966667	Neuroblasts	NB_289	Annotated as Neuroblasts in olfactory bulb by reference
67	463	Olfactory inhibitory neurons	0.958963	OBDOP1	0.714903	Telencephalon GABAergic neurons	TeInh_LGE_67
68	1060	Olfactory inhibitory neurons	0.990566	OBNBL5	0.788679	Telencephalon GABAergic neurons	TeInh_LGE_68	Mapped to LGE by SAMap.
81	399	Olfactory inhibitory neurons	0.992481	OBINH4	0.992481	Telencephalon GABAergic neurons	TeInh_LGE_81
57	858	Olfactory inhibitory neurons	0.923077	OBINH2	0.688811	Telencephalon GABAergic neurons	TeInh_LGE_57	Mapped to LGE by SAMap.
75	6307	Cerebellum neurons	0.604883	CBGRC	0.588711	Rhombencephalon glutamatergic neurons	ReExc_Cerebellum granule neurons_75	Annotated in cerebellum by reference
56	260	Di- and mesencephalon excitatory neurons	0.653846	CR	0.634615	Mixture	Mixture_56	Mixed with some neurons from Olfactory bulb
33	2445	Non-glutamatergic neuroblasts	0.987321	OBNBL3	0.851125	Neuroblasts	NB_33
74	286	Cerebellum neurons	0.734266	CBNBL2	0.601399	Neuroblasts	NB_74
1	222	Non-glutamatergic neuroblasts	0.783784	DGNBL2	0.779279	Neuroblasts	NB_1
51	1284	Non-glutamatergic neuroblasts	0.975078	DGNBL2	0.88785	Neuroblasts	NB_51
114	204	Dentate gyrus granule neurons	0.75	DGGRC1	0.593137	Telencephalon glutamatergic neurons	TeExc_114	Mixed with some granule neuroblasts
111	3267	Dentate gyrus granule neurons	0.981022	DGGRC2	0.88491	Telencephalon glutamatergic neurons	TeExc_111
112	895	Dentate gyrus granule neurons	0.940782	DGGRC1	0.497207	Telencephalon glutamatergic neurons	TeExc_112	Mixed with some granule neuroblasts
19	239	Telencephalon projecting inhibitory neurons	0.799163	MSN6	0.619247	Telencephalon GABAergic neurons	TeInh_19
64	311	Telencephalon projecting inhibitory neurons	0.81672	MSN6	0.778135	Telencephalon GABAergic neurons	TeInh_64
26	335	Telencephalon projecting inhibitory neurons	0.997015	MSN5	0.961194	Telencephalon GABAergic neurons	TeInh_26
27	2490	Telencephalon projecting inhibitory neurons	0.992771	MSN4	0.613655	Telencephalon GABAergic neurons	TeInh_27
28	2302	Telencephalon projecting inhibitory neurons	0.998262	MSN3	0.520417	Telencephalon GABAergic neurons	TeInh_28
109	762	Telencephalon projecting excitatory neurons	0.981627	TEGLU4	0.21916	Telencephalon glutamatergic neurons	TeExc_109
91	183	Telencephalon projecting excitatory neurons	1	TEGLU24	0.934426	Telencephalon glutamatergic neurons	TeExc_Hippocampus_91	Annotated in hippocampus by reference
174	340	Telencephalon projecting excitatory neurons	1	TEGLU8	0.994118	Telencephalon glutamatergic neurons	TeExc_174
122	147	Telencephalon projecting excitatory neurons	0.993197	TEGLU1	0.938776	Telencephalon glutamatergic neurons	TeExc_122
127	214	Telencephalon projecting excitatory neurons	0.985981	TEGLU1	0.948598	Telencephalon glutamatergic neurons	TeExc_127
153	299	Telencephalon projecting excitatory neurons	0.993311	TEGLU2	0.765886	Telencephalon glutamatergic neurons	TeExc_Amygdala_153	Annotated in amygdala by reference
152	510	Telencephalon projecting excitatory neurons	1	TEGLU3	0.994118	Telencephalon glutamatergic neurons	TeExc_152
123	395	Telencephalon projecting excitatory neurons	1	TEGLU3	0.881013	Telencephalon glutamatergic neurons	TeExc_123
155	1731	Telencephalon projecting excitatory neurons	1	TEGLU3	0.989601	Telencephalon glutamatergic neurons	TeExc_155
172	283	Telencephalon projecting excitatory neurons	0.996466	TEGLU12	0.989399	Telencephalon glutamatergic neurons	TeExc_172
158	155	Telencephalon projecting excitatory neurons	1	TEGLU15	0.929032	Telencephalon glutamatergic neurons	TeExc_158
125	504	Telencephalon projecting excitatory neurons	0.968254	TEGLU6	0.916667	Telencephalon glutamatergic neurons	TeExc_125
159	147	Telencephalon projecting excitatory neurons	1	TEGLU13	0.768707	Telencephalon glutamatergic neurons	TeExc_159
160	140	Telencephalon projecting excitatory neurons	0.985714	TEGLU5	0.771429	Telencephalon glutamatergic neurons	TeExc_160
169	491	Telencephalon projecting excitatory neurons	1	TEGLU4	0.967413	Telencephalon glutamatergic neurons	TeExc_169
117	956	Telencephalon projecting excitatory neurons	0.952929	TEGLU22	0.332636	Telencephalon glutamatergic neurons	TeExc_Amygdala_117	Annotated in amygdala by reference
163	597	Telencephalon projecting excitatory neurons	1	TEGLU22	0.777219	Telencephalon glutamatergic neurons	TeExc_Amygdala_163	Annotated in amygdala by reference
165	666	Telencephalon projecting excitatory neurons	0.995495	TEGLU17	0.75976	Telencephalon glutamatergic neurons	TeExc_165
167	685	Telencephalon projecting excitatory neurons	0.99562	TEGLU18	0.776642	Telencephalon glutamatergic neurons	TeExc_167
124	1326	Telencephalon projecting excitatory neurons	0.998492	TEGLU8	0.953997	Telencephalon glutamatergic neurons	TeExc_124
191	1031	Telencephalon projecting excitatory neurons	0.99806	TEGLU8	0.837051	Telencephalon glutamatergic neurons	TeExc_191
173	364	Telencephalon projecting excitatory neurons	1	TEGLU8	0.947802	Telencephalon glutamatergic neurons	TeExc_173
177	2246	Telencephalon projecting excitatory neurons	0.998664	TEGLU7	0.934105	Telencephalon glutamatergic neurons	TeExc_177
171	115	Telencephalon projecting excitatory neurons	1	TEGLU21	0.582609	Telencephalon glutamatergic neurons	TeExc_Hippocampus_171	Annotated in hippocampus by reference
170	866	Telencephalon projecting excitatory neurons	1	TEGLU10	0.806005	Telencephalon glutamatergic neurons	TeExc_170
186	1115	Telencephalon projecting excitatory neurons	0.997309	TEGLU11	0.925561	Telencephalon glutamatergic neurons	TeExc_186
189	230	Telencephalon projecting excitatory neurons	0.995652	TEGLU11	0.921739	Telencephalon glutamatergic neurons	TeExc_189
162	162	Telencephalon projecting excitatory neurons	1	TEGLU22	0.975309	Telencephalon glutamatergic neurons	TeExc_Amygdala_162
118	1767	Telencephalon projecting excitatory neurons	1	TEGLU24	0.98755	Telencephalon glutamatergic neurons	TeExc_Hippocampus_118	Annotated in hippocampus by reference
200	335	Telencephalon projecting excitatory neurons	1	TEGLU23	0.940299	Telencephalon glutamatergic neurons	TeExc_Hippocampus_200	Annotated in hippocampus by reference
309	135	Di- and mesencephalon excitatory neurons	1	DECHO2	1	Diencephalon glutamatergic neurons	DeExc_Habenular neurons_309	Annotated as habenular neurons by reference
311	148	Peptidergic neurons	1	HYPEP5	0.709459	Peptidergic neurons	DePep_311
310	240	Peptidergic neurons	0.9125	DEINH8	0.216667	Diencephalon GABAergic neurons	DeInh_310	express GAD1/2 and several peptidergic neuron markers
60	253	Peptidergic neurons	0.988142	DEINH7	0.577075	Diencephalon GABAergic neurons	DeInh_60	express GAD1/2 and several peptidergic neuron markers
338	169	Di- and mesencephalon excitatory neurons	0.343195	DEGLU3	0.0828402	Mixture	Mixture_338	mixed with some neurons and glial cells
87	297	Di- and mesencephalon excitatory neurons	0.397306	DEGLU3	0.0639731	Mixture	Mixture_87	mixed with some neurons and glial cells
88	183	Telencephalon inhibitory interneurons	0.704918	TEINH17	0.513661	Telencephalon GABAergic neurons	TeInh_88
86	289	Telencephalon inhibitory interneurons	0.986159	TEINH15	0.470588	Telencephalon GABAergic neurons	TeInh_CGE_86	Annotated as CGE-derived neurogliaform cells in cortex/hippocampus; Mapped to CGE/MGE-derived neurons.
316	220	Telencephalon inhibitory interneurons	1	TEINH16	0.581818	Telencephalon GABAergic neurons	TeInh_MGE_316	Annotated as Ivy and MGE-derived neurogliaform cells, cortex/hippocampus; but Mapped to CGE-derived neurons.
263	1252	Telencephalon inhibitory interneurons	0.998403	TEINH15	0.652556	Telencephalon GABAergic neurons	TeInh_CGE_263	Annotated as CGE-derived neurogliaform cells in cortex/hippocampus
264	348	Telencephalon inhibitory interneurons	1	TEINH16	0.982759	Telencephalon GABAergic neurons	TeInh_MGE_264	Annotated as Ivy and MGE-derived neurogliaform cells, cortex/hippocampus
313	174	Telencephalon inhibitory interneurons	1	TEINH9	0.551724	Telencephalon GABAergic neurons	TeInh_CGE_313	Express Cck; mapped to CGE-derived neurons.
213	212	Telencephalon inhibitory interneurons	1	TEINH10	0.570755	Telencephalon GABAergic neurons	TeInh_CGE_213	Express Cck; mapped to CGE-derived neurons.
262	560	Telencephalon inhibitory interneurons	1	TEINH10	0.514286	Telencephalon GABAergic neurons	TeInh_CGE_262	Express Cck; mostly mapped to CGE-derived neurons.
261	177	Telencephalon inhibitory interneurons	1	TEINH11	0.819209	Telencephalon GABAergic neurons	TeInh_CGE_261	Express Cck; mapped to CGE-derived neurons.
215	314	Telencephalon inhibitory interneurons	1	TEINH12	0.796178	Telencephalon GABAergic neurons	TeInh_CGE_215	Express Cck; mapped to CGE-derived neurons.
214	237	Telencephalon inhibitory interneurons	1	TEINH11	0.987342	Telencephalon GABAergic neurons	TeInh_CGE_214	Express Cck; mapped to CGE-derived neurons.
260	207	Telencephalon inhibitory interneurons	1	TEINH11	0.73913	Telencephalon GABAergic neurons	TeInh_CGE_260	Express Cck; mapped to CGE-derived neurons.
315	137	Telencephalon inhibitory interneurons	1	TEINH7	0.423358	Telencephalon GABAergic neurons	TeInh_315
257	350	Telencephalon inhibitory interneurons	0.994286	TEINH13	0.305714	Telencephalon GABAergic neurons	TeInh_257
320	189	Telencephalon inhibitory interneurons	0.994709	TEINH6	0.539683	Telencephalon GABAergic neurons	TeInh_320
322	288	Telencephalon inhibitory interneurons	1	TEINH5	0.822917	Telencephalon GABAergic neurons	TeInh_322
323	273	Telencephalon inhibitory interneurons	1	TEINH4	0.802198	Telencephalon GABAergic neurons	TeInh_323
254	321	Telencephalon inhibitory interneurons	1	TEINH21	0.937695	Telencephalon GABAergic neurons	TeInh_254
212	482	Telencephalon inhibitory interneurons	1	TEINH19	0.962656	Telencephalon GABAergic neurons	TeInh_212
253	314	Telencephalon inhibitory interneurons	1	TEINH19	1	Telencephalon GABAergic neurons	TeInh_253
336	484	Telencephalon inhibitory interneurons	0.964876	TEINH19	0.330579	Telencephalon GABAergic neurons	TeInh_336
211	416	Telencephalon inhibitory interneurons	0.961538	TEINH17	0.75	Telencephalon GABAergic neurons	TeInh_211
256	370	Telencephalon inhibitory interneurons	0.997297	TEINH18	0.872973	Telencephalon GABAergic neurons	TeInh_256
244	749	Di- and mesencephalon excitatory neurons	1	DEGLU3	0.970628	Diencephalon glutamatergic neurons	DeExc_Thalamus_244	Annotated in thalamus by reference
245	202	Di- and mesencephalon excitatory neurons	1	DEGLU3	0.866337	Diencephalon glutamatergic neurons	DeExc_Thalamus_245	Annotated in thalamus by reference
246	225	Di- and mesencephalon excitatory neurons	1	DEGLU2	0.964444	Diencephalon glutamatergic neurons	DeExc_Hypothalamus_246	Annotated in hypothalamus by reference
247	1067	Di- and mesencephalon excitatory neurons	1	DEGLU1	0.907216	Diencephalon glutamatergic neurons	DeExc_Thalamus_247	Annotated in thalamus by reference
265	925	Di- and mesencephalon inhibitory neurons	0.997838	MEINH10	0.792432	Mesencephalon GABAergic neurons	MeInh_265
328	186	Di- and mesencephalon inhibitory neurons	1	MEINH9	0.892473	Mesencephalon GABAergic neurons	MeInh_328
337	247	Olfactory inhibitory neurons	0.238866	OBINH2	0.125506	Mixture	Mixture_337	Mixed with different neurons
273	249	Di- and mesencephalon excitatory neurons	0.542169	OBNBL1	0.253012	Neuroblasts	NB_273
329	153	Glutamatergic neuroblasts	0.921569	SEPNBL	0.503268	Neuroblasts	NB_329
269	309	Telencephalon inhibitory interneurons	1	DEINH1	0.644013	Telencephalon GABAergic neurons	TeInh_269
270	994	Peptidergic neurons	0.916499	TEINH2	0.908451	Mesencephalon glutamatergic neurons	MeExc_270
271	379	Di- and mesencephalon excitatory neurons	0.997361	MEGLU5	0.44591	Mesencephalon glutamatergic neurons	MeExc_271
275	207	Di- and mesencephalon excitatory neurons	0.995169	MEGLU11	0.768116	Mesencephalon glutamatergic neurons	MeExc_275
276	759	Di- and mesencephalon excitatory neurons	0.910408	MEGLU10	0.274045	Mesencephalon glutamatergic neurons	MeExc_276
277	667	Di- and mesencephalon excitatory neurons	0.97901	MEGLU8	0.28036	Mesencephalon glutamatergic neurons	De/MeExc_277
63	3002	Peptidergic neurons	0.262159	TEINH2	0.0986009	Mixture	Mixture_63	Mixed with many other neurons
210	231	Di- and mesencephalon inhibitory neurons	0.709957	TEINH1	0.329004	Diencephalon GABAergic neurons	DeInh_210
280	1048	Di- and mesencephalon inhibitory neurons	0.645038	TEINH1	0.218511	Diencephalon GABAergic neurons	DeInh_280
278	781	Di- and mesencephalon inhibitory neurons	0.878361	MEINH2	0.362356	Mesencephalon GABAergic neurons	De/MeInh_278	from midbrain and thalamus
287	478	Di- and mesencephalon excitatory neurons	0.947699	DEGLU5	0.472803	Mesencephalon GABAergic neurons	De/MeInh_287	from midbrain and thalamus
268	264	Hindbrain neurons	0.753788	HBGLU6	0.295455	Rhombencephalon glutamatergic neurons	ReExc_268
266	460	Di- and mesencephalon excitatory neurons	0.530435	HBGLU2	0.271739	Rhombencephalon glutamatergic neurons	ReExc_266
267	366	Di- and mesencephalon inhibitory neurons	0.428962	HBINH5	0.42623	Rhombencephalon GABAergic neurons	ReInh_267
208	117	Cholinergic and monoaminergic neurons	1	DECHO1	0.623932	Diencephalon cholinergic neurons	DeChol_208
209	262	Cholinergic and monoaminergic neurons	0.89313	HBCHO3	0.21374	Rhombencephalon cholinergic neurons	ReChol_209
272	303	Cholinergic and monoaminergic neurons	0.613861	MBDOP2	0.128713	Mesencephalon cholinergic neurons	MeChol_272
395	2189	Microglia	1	MGL1	0.935587	Microglia	Microglia_395
404	2402	Microglia	1	MGL2	0.590758	Microglia	Microglia_404
407	404	Perivascular macrophages	1	PVM2	0.893564	Immune cells	Imm_407
406	692	Perivascular macrophages	0.998555	PVM1	0.90896	Immune cells	Imm_406
409	707	Perivascular macrophages	1	PVM1	0.775106	Immune cells	Imm_409
457	129	Vascular and leptomeningeal cells	1	ABC	0.992248	Vascular cells	Vasc_457
460	485	Vascular and leptomeningeal cells	0.991753	VLMC1	0.934021	Vascular cells	Vasc_460
461	202	Vascular and leptomeningeal cells	1	VLMC1	0.856436	Vascular cells	Vasc_461
458	283	Vascular and leptomeningeal cells	1	VLMC2	0.996466	Vascular cells	Vasc_458
459	270	Vascular and leptomeningeal cells	1	VLMC2	0.988889	Vascular cells	Vasc_459
421	396	Pericytes	0.368687	PER1	0.356061	Vascular cells	Vasc_421
424	207	Pericytes	0.94686	PER1	0.94686	Vascular cells	Vasc_424
417	1441	Vascular endothelial cells	0.918806	VECV	0.870229	Vascular cells	Vasc_417
419	457	Pericytes	0.978118	PER2	0.579869	Vascular cells	Vasc_419
426	3066	Pericytes	0.964123	PER1	0.926288	Vascular cells	Vasc_426
412	340	Vascular endothelial cells	0.979412	VECC	0.897059	Vascular cells	Vasc_412
413	367	Vascular endothelial cells	0.991826	VECC	0.991826	Vascular cells	Vasc_413
450	282	Vascular smooth muscle cells	0.762411	PER3	0.72695	Vascular cells	Vasc_450
452	749	Vascular smooth muscle cells	0.99466	VSMCA	0.985314	Vascular cells	Vasc_452
456	304	Vascular smooth muscle cells	1	VSMCA	0.996711	Vascular cells	Vasc_456
392	719	Oligodendrocytes	0.998609	COP1	0.528512	Oligodendrocytes	Oligo_392
356	343	Oligodendrocytes	1	NFOL1	0.644315	Oligodendrocytes	Oligo_356
341	157	Oligodendrocytes	1	NFOL1	1	Oligodendrocytes	Oligo_341
359	722	Oligodendrocytes	1	NFOL1	0.973684	Oligodendrocytes	Oligo_359
382	669	Oligodendrocytes	1	MFOL2	0.710015	Oligodendrocytes	Oligo_382
375	2597	Oligodendrocytes	1	MOL1	0.542549	Oligodendrocytes	Oligo_375
384	727	Oligodendrocytes	1	MFOL2	0.724897	Oligodendrocytes	Oligo_384
366	879	Oligodendrocytes	1	MOL3	0.555176	Oligodendrocytes	Oligo_366
370	856	Oligodendrocytes	0.998832	MOL1	0.578271	Oligodendrocytes	Oligo_370
367	500	Oligodendrocytes	1	MOL2	0.676	Oligodendrocytes	Oligo_367
378	8007	Oligodendrocytes	1	MOL2	0.496066	Oligodendrocytes	Oligo_378
372	509	Oligodendrocytes	1	MOL1	0.899804	Oligodendrocytes	Oligo_372
373	627	Oligodendrocytes	1	MOL1	0.61244	Oligodendrocytes	Oligo_373
380	229	Oligodendrocytes	1	MFOL1	0.947598	Oligodendrocytes	Oligo_380
364	736	Oligodendrocytes	1	MOL2	0.993207	Oligodendrocytes	Oligo_364
361	2458	Oligodendrocytes	1	MFOL1	0.57323	Oligodendrocytes	Oligo_361
365	256	Oligodendrocytes	1	MOL2	0.558594	Oligodendrocytes	Oligo_365
388	396	Oligodendrocytes	0.959596	COP1	0.957071	Oligodendrocytes	Oligo_388
389	553	Oligodendrocytes	1	COP1	0.951175	Oligodendrocytes	Oligo_389
474	499	Oligodendrocyte precursor cells	0.92986	OPC	0.92986	Oligodendrocyte precursor cells	OPC_474
475	231	Oligodendrocyte precursor cells	0.965368	OPC	0.965368	Oligodendrocyte precursor cells	OPC_475
465	289	Olfactory ensheathing cells	1	OEC	1	Olfactory ensheathing cells	OEC_465
470	270	Olfactory ensheathing cells	1	OEC	1	Olfactory ensheathing cells	OEC_470
471	1439	Olfactory ensheathing cells	0.995136	OEC	0.995136	Olfactory ensheathing cells	OEC_471
477	505	Non-glutamatergic neuroblasts	0.99802	SZNBL	0.992079	Neuroblasts	NB_477
479	264	Non-glutamatergic neuroblasts	0.670455	SZNBL	0.473485	Neuroblasts	NB_479
497	927	Astrocytes	0.994606	ACBG	0.990291	Astrocytes	Ast_Bergmann glia_497	Mapped to other bergmann glia by SAMap
495	571	Subventricular zone radial glia-like cells	0.831874	RGSZ	0.831874	Astrocytes	Ast_495
496	327	Dentate gyrus radial glia-like cells	0.807339	RGDG	0.807339	Astrocytes	Ast_496
482	783	Astrocytes	1	ACMB	0.965517	Astrocytes	Ast_482
504	1001	Astrocytes	0.983017	ACOB	0.936064	Astrocytes	Ast_504
505	435	Astrocytes	0.995402	ACOB	0.990805	Astrocytes	Ast_505
498	7998	Astrocytes	0.987497	ACNT1	0.666042	Astrocytes	Ast_498
506	1457	Astrocytes	0.978037	ACTE1	0.862045	Astrocytes	Ast_506
507	4309	Astrocytes	0.970527	ACTE2	0.829891	Astrocytes	Ast_507
509	1284	Astrocytes	0.926012	ACTE1	0.80296	Astrocytes	Ast_509
431	413	Choroid epithelial cells	1	CHOR	1	Choroid plexus epithelial cells	ChorEpi_431
463	122	Subcommissural organ hypendymal cells	0.868852	HYPEN	0.868852	Ependymal cells	Epen_463
339	413	Ependymal cells	0.961259	EPEN	0.951574	Ependymal cells	Epen_339
462	270	Ependymal cells	0.988889	EPEN	0.948148	Ependymal cells	Epen_462

## Sheet: S2-Hsap
Table S2-Hsap. Refined annotation on iterative clustering at cell type family and cell subtype level for human.
Cluster	Cell number	Major labelling of reference	ratio of Major labelling of reference	subtype labelling of reference	ratio of subtype labelling of reference	Refined family	Refined subtype	Notes
2	4895	Upper rhombic lip	1	URL_311	0.711338	Rhombencephalon glutamatergic neurons	ReExc_2
314	215	Cerebellar inhibitory	0.986047	CBI_307	0.530233	Rhombencephalon GABAergic neurons	ReInh_314
315	360	Cerebellar inhibitory	1	CBI_306	0.763889	Rhombencephalon GABAergic neurons	ReInh_315
310	207	Thalamic excitatory	0.995169	Thex_446	0.690821	Diencephalon glutamatergic neurons	DeExc_310	Mapped to thalamus and hypothalamus excitatory neurons by SAMap.
311	193	Thalamic excitatory	0.989637	Thex_446	0.849741	Diencephalon glutamatergic neurons	DeExc_311
312	379	Thalamic excitatory	1	Thex_446	0.905013	Diencephalon glutamatergic neurons	DeExc_312
309	438	Thalamic excitatory	1	Thex_451	0.552511	Diencephalon glutamatergic neurons	DeExc_309
307	187	Thalamic excitatory	1	Thex_454	0.807487	Diencephalon glutamatergic neurons	DeExc_307
308	342	Thalamic excitatory	1	Thex_451	0.269006	Diencephalon glutamatergic neurons	DeExc_308
303	242	Thalamic excitatory	1	Thex_452	0.756198	Diencephalon glutamatergic neurons	DeExc_303	Mapped to thalamus and hypothalamus excitatory neurons by SAMap.
304	538	Thalamic excitatory	1	Thex_454	0.420074	Diencephalon glutamatergic neurons	DeExc_304	Mapped to thalamus and hypothalamus excitatory neurons by SAMap.
282	254	Thalamic excitatory	1	Thex_460	1	Diencephalon glutamatergic neurons	DeExc_282
283	236	Thalamic excitatory	0.974576	Thex_459	0.292373	Diencephalon glutamatergic neurons	DeExc_283	Mapped to thalamus and hypothalamus excitatory neurons by SAMap.
284	372	Thalamic excitatory	1	Thex_458	0.650538	Diencephalon glutamatergic neurons	DeExc_284	Mapped to thalamus and hypothalamus excitatory neurons by SAMap.
31	281	Medium spiny neuron	1	MSN_216	0.654804	Telencephalon GABAergic neurons	TeInh_LGE_31
28	969	Medium spiny neuron	0.99484	MSN_214	0.47162	Telencephalon GABAergic neurons	TeInh_LGE_28
32	497	Medium spiny neuron	1	MSN_213	0.452716	Telencephalon GABAergic neurons	TeInh_LGE_32
33	289	Medium spiny neuron	1	MSN_213	0.944637	Telencephalon GABAergic neurons	TeInh_LGE_33
27	161	Medium spiny neuron	1	MSN_210	0.863354	Telencephalon GABAergic neurons	TeInh_LGE_27
15	440	Medium spiny neuron	1	MSN_207	0.795455	Telencephalon GABAergic neurons	TeInh_LGE_15
35	1002	Medium spiny neuron	1	MSN_209	0.414172	Telencephalon GABAergic neurons	TeInh_LGE_35
40	705	Medium spiny neuron	1	MSN_207	0.597163	Telencephalon GABAergic neurons	TeInh_LGE_40
42	314	Medium spiny neuron	0.996815	MSN_211	0.894904	Telencephalon GABAergic neurons	TeInh_LGE_42
43	310	Medium spiny neuron	1	MSN_212	0.787097	Telencephalon GABAergic neurons	TeInh_LGE_43
269	155	Eccentric medium spiny neuron	1	EMSN_228	0.793548	Telencephalon GABAergic neurons	TeInh_LGE_269
270	339	Eccentric medium spiny neuron	0.99705	EMSN_226	0.569322	Telencephalon GABAergic neurons	TeInh_LGE_270
271	305	Eccentric medium spiny neuron	0.678689	EMSN_230	0.259016	Telencephalon GABAergic neurons	TeInh_LGE_271
272	238	Eccentric medium spiny neuron	1	EMSN_232	0.39916	Telencephalon GABAergic neurons	TeInh_LGE_272
273	230	Eccentric medium spiny neuron	1	EMSN_234	0.465217	Telencephalon GABAergic neurons	TeInh_LGE_273
257	262	Eccentric medium spiny neuron	0.614504	MSN_221	0.366412	Telencephalon GABAergic neurons	TeInh_LGE_257
268	256	Eccentric medium spiny neuron	1	EMSN_224	0.402344	Telencephalon GABAergic neurons	TeInh_LGE_268
274	224	Medium spiny neuron	1	MSN_219	0.995536	Telencephalon GABAergic neurons	TeInh_LGE_274
278	309	Medium spiny neuron	0.944984	MSN_217	0.530744	Telencephalon GABAergic neurons	TeInh_LGE_278
279	255	Medium spiny neuron	0.996078	MSN_218	0.533333	Telencephalon GABAergic neurons	TeInh_LGE_279
112	788	Hippocampal dentate gyrus	1	DG_204	0.431472	Telencephalon glutamatergic neurons	TeExc_Hippocampus_112
565	259	Hippocampal dentate gyrus	1	DG_200	0.864865	Telencephalon glutamatergic neurons	TeExc_Hippocampus_565
144	261	Hippocampal dentate gyrus	1	DG_200	0.954023	Telencephalon glutamatergic neurons	TeExc_Hippocampus_144
149	1429	Hippocampal dentate gyrus	1	DG_201	0.480756	Telencephalon glutamatergic neurons	TeExc_Hippocampus_149
254	267	Miscellaneous	0.906367	L5ET_117	0.438202	Telencephalon glutamatergic neurons	TeExc_254
255	279	Hippocampal CA1-3	1	CA13_119	0.956989	Telencephalon glutamatergic neurons	TeExc_Hippocampus_255
158	1361	Hippocampal CA1-3	1	CA13_180	0.407788	Telencephalon glutamatergic neurons	TeExc_Hippocampus_158
159	373	Hippocampal CA1-3	0.997319	CA13_186	0.485255	Telencephalon glutamatergic neurons	TeExc_Hippocampus_159
156	299	Hippocampal CA1-3	0.976589	CA13_179	0.401338	Telencephalon glutamatergic neurons	TeExc_Hippocampus_156
160	580	Hippocampal CA1-3	1	CA13_183	0.332759	Telencephalon glutamatergic neurons	TeExc_Hippocampus_160
154	259	Hippocampal CA4	0.996139	CA4_195	0.277992	Telencephalon glutamatergic neurons	TeExc_Hippocampus_154
155	158	Hippocampal CA4	1	CA4_197	0.316456	Telencephalon glutamatergic neurons	TeExc_Hippocampus_155
247	314	Deep-layer corticothalamic and 6b	0.996815	DLCT6b_105	0.461783	Telencephalon glutamatergic neurons	TeExc_247
248	300	Deep-layer corticothalamic and 6b	1	DLCT6b_106	0.763333	Telencephalon glutamatergic neurons	TeExc_248
105	268	Deep-layer corticothalamic and 6b	0.992537	DLCT6b_98	0.41791	Telencephalon glutamatergic neurons	TeExc_105
246	418	Deep-layer corticothalamic and 6b	0.997608	DLCT6b_101	0.248804	Telencephalon glutamatergic neurons	TeExc_246
249	167	Deep-layer corticothalamic and 6b	0.892216	DLCT6b_112	0.628743	Telencephalon glutamatergic neurons	TeExc_249
251	529	Deep-layer corticothalamic and 6b	1	DLCT6b_110	0.468809	Telencephalon glutamatergic neurons	TeExc_251
104	196	Deep-layer corticothalamic and 6b	0.984694	DLCT6b_108	0.387755	Telencephalon glutamatergic neurons	TeExc_104
253	621	Deep-layer corticothalamic and 6b	1	DLCT6b_109	0.516908	Telencephalon glutamatergic neurons	TeExc_253
110	203	Deep-layer corticothalamic and 6b	0.995074	DLCT6b_84	0.931034	Telencephalon glutamatergic neurons	TeExc_110
107	253	Deep-layer near-projecting	0.992095	DLNP_88	0.233202	Telencephalon glutamatergic neurons	TeExc_107
108	487	Deep-layer near-projecting	1	DLNP_94	0.170431	Telencephalon glutamatergic neurons	TeExc_108
170	454	Deep-layer intratelencephalic	1	DLIT_150	0.715859	Telencephalon glutamatergic neurons	TeExc_170
169	475	Deep-layer intratelencephalic	1	DLIT_151	0.690526	Telencephalon glutamatergic neurons	TeExc_169
172	418	Deep-layer intratelencephalic	1	DLIT_151	0.610048	Telencephalon glutamatergic neurons	TeExc_172
95	339	Deep-layer intratelencephalic	0.985251	DLIT_137	0.938053	Telencephalon glutamatergic neurons	TeExc_95
96	304	Deep-layer intratelencephalic	0.970395	DLIT_137	0.953947	Telencephalon glutamatergic neurons	TeExc_96
79	348	Deep-layer intratelencephalic	0.994253	DLIT_142	0.548851	Telencephalon glutamatergic neurons	TeExc_79
231	749	Deep-layer intratelencephalic	0.971963	DLIT_143	0.361816	Telencephalon glutamatergic neurons	TeExc_231
78	1316	Deep-layer intratelencephalic	0.99848	DLIT_144	0.601824	Telencephalon glutamatergic neurons	TeExc_78
81	707	Deep-layer intratelencephalic	0.998586	DLIT_141	0.492221	Telencephalon glutamatergic neurons	TeExc_81
84	741	Deep-layer intratelencephalic	0.99865	DLIT_139	0.820513	Telencephalon glutamatergic neurons	TeExc_84
86	244	Deep-layer intratelencephalic	1	DLIT_139	0.922131	Telencephalon glutamatergic neurons	TeExc_86
103	263	Upper-layer intratelencephalic	0.973384	ULIT_138	0.851711	Telencephalon glutamatergic neurons	TeExc_103
100	1834	Upper-layer intratelencephalic	0.996728	ULIT_138	0.979826	Telencephalon glutamatergic neurons	TeExc_100
98	206	Upper-layer intratelencephalic	0.966019	ULIT_138	0.927184	Telencephalon glutamatergic neurons	TeExc_98
88	641	Upper-layer intratelencephalic	0.99064	ULIT_135	0.939158	Telencephalon glutamatergic neurons	TeExc_88
90	333	Upper-layer intratelencephalic	0.93994	ULIT_135	0.63964	Telencephalon glutamatergic neurons	TeExc_90
45	316	Upper-layer intratelencephalic	0.870253	ULIT_133	0.78481	Telencephalon glutamatergic neurons	TeExc_45
69	397	Upper-layer intratelencephalic	0.934509	ULIT_133	0.403023	Telencephalon glutamatergic neurons	TeExc_69
70	228	Upper-layer intratelencephalic	1	ULIT_133	0.807018	Telencephalon glutamatergic neurons	TeExc_70
66	381	Upper-layer intratelencephalic	0.750656	ULIT_130	0.204724	Telencephalon glutamatergic neurons	TeExc_66
71	264	Upper-layer intratelencephalic	1	ULIT_128	0.530303	Telencephalon glutamatergic neurons	TeExc_71
73	337	Upper-layer intratelencephalic	1	ULIT_134	0.575668	Telencephalon glutamatergic neurons	TeExc_73
76	504	Upper-layer intratelencephalic	0.996032	ULIT_129	0.440476	Telencephalon glutamatergic neurons	TeExc_76
97	152	Miscellaneous	0.927632	Misc_177	0.644737	Telencephalon glutamatergic neurons	TeExc_97
173	223	Miscellaneous	0.991031	Misc_165	0.412556	Telencephalon glutamatergic neurons	TeExc_173
174	274	Amygdala excitatory	0.99635	Amex_172	0.69708	Telencephalon glutamatergic neurons	TeExc_Amygdala_174
175	225	Amygdala excitatory	1	Amex_172	0.697778	Telencephalon glutamatergic neurons	TeExc_Amygdala_175
188	357	Amygdala excitatory	1	Amex_155	0.588235	Telencephalon glutamatergic neurons	TeExc_Amygdala_188
189	369	Amygdala excitatory	1	Amex_155	0.634146	Telencephalon glutamatergic neurons	TeExc_Amygdala_189
190	351	Amygdala excitatory	0.91453	Amex_405	0.589744	Telencephalon glutamatergic neurons	TeExc_Amygdala_190
194	351	Amygdala excitatory	0.863248	Amex_161	0.356125	Telencephalon glutamatergic neurons	TeExc_Amygdala_194
195	272	Amygdala excitatory	1	Amex_161	0.327206	Telencephalon glutamatergic neurons	TeExc_Amygdala_195
191	791	Amygdala excitatory	0.97598	Amex_157	0.404551	Telencephalon glutamatergic neurons	TeExc_Amygdala_191
193	393	Amygdala excitatory	0.994911	Amex_157	0.452926	Telencephalon glutamatergic neurons	TeExc_Amygdala_193
202	239	Upper-layer intratelencephalic	0.991632	ULIT_131	0.899582	Telencephalon glutamatergic neurons	TeExc_202
93	169	Deep-layer intratelencephalic	0.508876	DLIT_150	0.230769	Telencephalon glutamatergic neurons	TeExc_93
244	766	Deep-layer intratelencephalic	0.998695	DLIT_148	0.519582	Telencephalon glutamatergic neurons	TeExc_244
243	256	Deep-layer intratelencephalic	1	DLIT_149	0.605469	Telencephalon glutamatergic neurons	TeExc_243
92	1208	Deep-layer intratelencephalic	0.986755	DLIT_149	0.71606	Telencephalon glutamatergic neurons	TeExc_92
233	241	Deep-layer intratelencephalic	0.879668	DLIT_145	0.539419	Telencephalon glutamatergic neurons	TeExc_233
234	257	Deep-layer intratelencephalic	0.984436	DLIT_146	0.513619	Telencephalon glutamatergic neurons	TeExc_234
235	184	Deep-layer intratelencephalic	0.978261	DLIT_147	0.788043	Telencephalon glutamatergic neurons	TeExc_235
572	854	Upper-layer intratelencephalic	0.264637	ULIT_130	0.117096	Telencephalon glutamatergic neurons	TeExc_572
68	1089	Upper-layer intratelencephalic	0.999082	ULIT_129	0.442608	Telencephalon glutamatergic neurons	TeExc_68
203	435	Upper-layer intratelencephalic	1	ULIT_130	0.455172	Telencephalon glutamatergic neurons	TeExc_203
228	310	Upper-layer intratelencephalic	1	ULIT_129	0.683871	Telencephalon glutamatergic neurons	TeExc_228
205	216	Upper-layer intratelencephalic	0.99537	ULIT_128	0.50463	Telencephalon glutamatergic neurons	TeExc_205
201	411	Upper-layer intratelencephalic	1	ULIT_131	0.815085	Telencephalon glutamatergic neurons	TeExc_201
204	325	Upper-layer intratelencephalic	0.996923	ULIT_120	0.286154	Telencephalon glutamatergic neurons	TeExc_204
178	2783	Upper-layer intratelencephalic	0.985268	ULIT_123	0.589651	Telencephalon glutamatergic neurons	TeExc_178
213	249	Upper-layer intratelencephalic	0.795181	ULIT_121	0.634538	Telencephalon glutamatergic neurons	TeExc_213
217	353	Upper-layer intratelencephalic	0.997167	ULIT_121	0.645892	Telencephalon glutamatergic neurons	TeExc_217
214	564	Upper-layer intratelencephalic	0.998227	ULIT_120	0.402482	Telencephalon glutamatergic neurons	TeExc_214
215	445	Upper-layer intratelencephalic	1	ULIT_121	0.838202	Telencephalon glutamatergic neurons	TeExc_215
207	560	Upper-layer intratelencephalic	0.996429	ULIT_126	0.571429	Telencephalon glutamatergic neurons	TeExc_207
229	420	Upper-layer intratelencephalic	0.990476	ULIT_126	0.469048	Telencephalon glutamatergic neurons	TeExc_229
219	198	Upper-layer intratelencephalic	1	ULIT_124	0.722222	Telencephalon glutamatergic neurons	TeExc_219
230	1538	Upper-layer intratelencephalic	1	ULIT_124	0.284135	Telencephalon glutamatergic neurons	TeExc_230
176	820	Upper-layer intratelencephalic	0.932927	ULIT_123	0.220732	Telencephalon glutamatergic neurons	TeExc_176
226	1469	Upper-layer intratelencephalic	0.99047	ULIT_124	0.168142	Telencephalon glutamatergic neurons	TeExc_226
199	381	Upper-layer intratelencephalic	0.958005	ULIT_126	0.459318	Telencephalon glutamatergic neurons	TeExc_199
197	337	Amygdala excitatory	0.916914	Amex_174	0.744807	Telencephalon glutamatergic neurons	TeExc_Amygdala_197
198	340	Amygdala excitatory	0.935294	Amex_175	0.658824	Telencephalon glutamatergic neurons	TeExc_Amygdala_198
321	271	Midbrain-derived inhibitory	1	Midi_439	0.697417	Mesencephalon GABAergic neurons	MeInh_321	Mostly from midbrain
341	911	Midbrain-derived inhibitory	1	Midi_441	0.683864	Diencephalon GABAergic neurons	DeInh_341	mostly from thalamus
329	763	Midbrain-derived inhibitory	1	Midi_438	0.296199	Diencephalon GABAergic neurons	DeInh_329	half from thalamus
335	580	Midbrain-derived inhibitory	1	Midi_443	0.477586	Diencephalon GABAergic neurons	DeInh_335	mostly from thalamus
338	208	Midbrain-derived inhibitory	1	Midi_436	0.663462	Diencephalon GABAergic neurons	DeInh_338	mostly from thalamus
322	387	Midbrain-derived inhibitory	1	Midi_439	0.571059	Diencephalon GABAergic neurons	DeInh_322
324	589	Midbrain-derived inhibitory	1	Midi_441	0.382003	Diencephalon GABAergic neurons	DeInh_324
326	573	Midbrain-derived inhibitory	1	Midi_443	0.212914	Diencephalon GABAergic neurons	DeInh_326
339	746	Midbrain-derived inhibitory	1	Midi_436	0.201072	Diencephalon GABAergic neurons	DeInh_339	mostly from thalamus
461	599	LAMP5-LHX6 and Chandelier	1	LLC_270	0.280467	Telencephalon GABAergic neurons	TeInh_461
464	615	LAMP5-LHX6 and Chandelier	1	LLC_274	0.411382	Telencephalon GABAergic neurons	TeInh_464
467	665	CGE interneuron	1	CGE_287	0.830075	Telencephalon GABAergic neurons	TeInh_CGE_467
469	1022	CGE interneuron	1	CGE_288	0.910959	Telencephalon GABAergic neurons	TeInh_CGE_469
501	358	CGE interneuron	1	CGE_286	0.784916	Telencephalon GABAergic neurons	TeInh_CGE_501
502	438	CGE interneuron	1	CGE_286	0.748858	Telencephalon GABAergic neurons	TeInh_CGE_502
477	444	CGE interneuron	1	CGE_294	0.484234	Telencephalon GABAergic neurons	TeInh_CGE_477
481	222	CGE interneuron	1	CGE_294	0.315315	Telencephalon GABAergic neurons	TeInh_CGE_481
483	442	CGE interneuron	1	CGE_293	0.565611	Telencephalon GABAergic neurons	TeInh_CGE_483
484	642	CGE interneuron	1	CGE_293	0.658879	Telencephalon GABAergic neurons	TeInh_CGE_484
490	318	CGE interneuron	1	CGE_289	0.889937	Telencephalon GABAergic neurons	TeInh_CGE_490
491	276	CGE interneuron	1	CGE_296	0.605072	Telencephalon GABAergic neurons	TeInh_CGE_491
492	169	CGE interneuron	1	CGE_296	0.692308	Telencephalon GABAergic neurons	TeInh_CGE_492
473	639	CGE interneuron	1	CGE_290	0.553991	Telencephalon GABAergic neurons	TeInh_CGE_473
474	314	CGE interneuron	1	CGE_290	0.898089	Telencephalon GABAergic neurons	TeInh_CGE_474
470	407	CGE interneuron	1	CGE_291	0.886978	Telencephalon GABAergic neurons	TeInh_CGE_470
480	427	CGE interneuron	1	CGE_292	0.824356	Telencephalon GABAergic neurons	TeInh_CGE_480
487	563	CGE interneuron	0.994671	CGE_284	0.584369	Telencephalon GABAergic neurons	TeInh_CGE_487
498	430	CGE interneuron	1	CGE_282	0.727907	Telencephalon GABAergic neurons	TeInh_CGE_498
499	392	CGE interneuron	1	CGE_283	0.678571	Telencephalon GABAergic neurons	TeInh_CGE_499
496	388	CGE interneuron	0.997423	CGE_278	0.791237	Telencephalon GABAergic neurons	TeInh_CGE_496
494	332	CGE interneuron	0.993976	CGE_279	0.599398	Telencephalon GABAergic neurons	TeInh_CGE_494
495	368	CGE interneuron	0.991848	CGE_279	0.277174	Telencephalon GABAergic neurons	TeInh_CGE_495
344	228	Splatter	1	Splat_409	0.986842	Telencephalon GABAergic neurons	TeInh_MGE_344
384	275	Splatter	1	Splat_238	0.956364	Telencephalon GABAergic neurons	TeInh_MGE_384
417	484	MGE interneuron	1	MGE_241	0.429752	Telencephalon GABAergic neurons	TeInh_MGE_417
418	595	MGE interneuron	0.989916	MGE_243	0.638655	Telencephalon GABAergic neurons	TeInh_MGE_418
414	422	MGE interneuron	0.810427	MGE_249	0.220379	Telencephalon GABAergic neurons	TeInh_MGE_414
415	291	MGE interneuron	0.773196	MGE_242	0.646048	Telencephalon GABAergic neurons	TeInh_MGE_415
409	811	MGE interneuron	0.998767	MGE_250	0.648582	Telencephalon GABAergic neurons	TeInh_MGE_409
413	270	MGE interneuron	0.996296	MGE_239	0.603704	Telencephalon GABAergic neurons	TeInh_MGE_413
428	386	MGE interneuron	0.766839	MGE_254	0.645078	Telencephalon GABAergic neurons	TeInh_MGE_428
421	853	MGE interneuron	0.987104	MGE_251	0.667057	Telencephalon GABAergic neurons	TeInh_MGE_421
427	243	MGE interneuron	1	MGE_253	0.666667	Telencephalon GABAergic neurons	TeInh_MGE_427
430	345	MGE interneuron	1	MGE_252	0.831884	Telencephalon GABAergic neurons	TeInh_MGE_430
431	398	MGE interneuron	1	MGE_252	0.663317	Telencephalon GABAergic neurons	TeInh_MGE_431
434	533	LAMP5-LHX6 and Chandelier	0.998124	LLC_264	0.454034	Telencephalon GABAergic neurons	TeInh_434
438	308	MGE interneuron	1	MGE_256	0.561688	Telencephalon GABAergic neurons	TeInh_MGE_438
440	166	MGE interneuron	1	MGE_255	0.674699	Telencephalon GABAergic neurons	TeInh_MGE_440
459	339	MGE interneuron	0.9941	MGE_261	0.40708	Telencephalon GABAergic neurons	TeInh_MGE_459
446	1307	MGE interneuron	1	MGE_261	0.324407	Telencephalon GABAergic neurons	TeInh_MGE_446
458	524	MGE interneuron	1	MGE_261	0.534351	Telencephalon GABAergic neurons	TeInh_MGE_458
442	686	MGE interneuron	1	MGE_259	0.367347	Telencephalon GABAergic neurons	TeInh_MGE_442
443	362	MGE interneuron	0.972376	MGE_259	0.350829	Telencephalon GABAergic neurons	TeInh_MGE_443
439	222	MGE interneuron	1	MGE_257	0.531532	Telencephalon GABAergic neurons	TeInh_MGE_439
455	316	MGE interneuron	1	MGE_258	0.531646	Telencephalon GABAergic neurons	TeInh_MGE_455
342	484	Mammillary body	1	Mmb_328	0.192149	Diencephalon glutamatergic neurons	DeExc_Hypothalamus_342
343	165	Mammillary body	0.987879	Mmb_324	0.278788	Diencephalon glutamatergic neurons	DeExc_Hypothalamus_343
362	383	Splatter	0.997389	Splat_365	0.261097	Splatter	Splatter_362
363	300	Splatter	1	Splat_364	0.52	Mesencephalon glutamatergic neurons	MeExc_363	more than 70% cells from midbrain and express SLC17A6
348	418	Splatter	0.782297	Splat_235	0.188995	Splatter	Splatter_348
276	425	Amygdala excitatory	0.390588	Amex_407	0.145882	Telencephalon glutamatergic neurons	Te/DeExc_276	Te/DeExc
277	545	Splatter	0.622018	Splat_429	0.473394	Diencephalon GABAergic neurons	DeInh_277
371	169	Splatter	0.994083	Splat_415	0.272189	Diencephalon GABAergic neurons	DeInh_371	mostly from hypothalamus and express GAD1/2
349	309	Splatter	0.983819	Splat_356	0.223301	Rhombencephalon GABAergic neurons	ReInh_349	half from medulla oblongata and express GAD1/2
356	243	Splatter	1	Splat_365	0.419753	Rhombencephalon GABAergic neurons	ReInh_356	part from pons
370	353	Splatter	0.957507	Splat_418	0.254958	Splatter	Splatter_370
345	1265	Splatter	0.894862	Splat_365	0.101186	Splatter	Splatter_345
357	484	Splatter	0.983471	Splat_365	0.128099	Splatter	Splatter_357
375	365	Splatter	0.967123	Splat_432	0.230137	Diencephalon GABAergic neurons	DeInh_375	mostly from hypothalamus
373	547	Splatter	0.974406	Splat_415	0.190128	Diencephalon GABAergic neurons	DeInh_373	more than 40% cells from hypothalamus and express GAD1/2
382	1308	Splatter	0.907492	Splat_415	0.380734	Splatter	Splatter_382
377	1281	Splatter	0.974239	Splat_368	0.13427	Mesencephalon glutamatergic neurons	MeExc_377	more than 40% cells from midbrain and express SLC17A6
381	1415	Splatter	0.980212	Splat_365	0.140636	Splatter	Splatter_381
358	785	Splatter	0.96051	Splat_368	0.185987	Mesencephalon glutamatergic neurons	MeExc_358	more than 40% cells from midbrain and express SLC17A6
359	959	Splatter	0.961418	Splat_365	0.344108	Splatter	Splatter_359
318	370	Lower rhombic lip	0.878378	LRL_320	0.572973	Rhombencephalon glutamatergic neurons	ReExc_318
316	1530	Lower rhombic lip	1	LRL_320	0.48366	Rhombencephalon glutamatergic neurons	ReExc_316
319	353	Lower rhombic lip	1	LRL_320	0.640227	Rhombencephalon glutamatergic neurons	ReExc_319
512	497	Microglia	1	Mgl_9	0.800805	Microglia	Microglia_512
513	8708	Microglia	0.999541	Mgl_7	0.40503	Microglia	Microglia_513
504	310	Microglia	0.996774	Mgl_12	0.993548	Microglia	Microglia_504
511	154	Microglia	0.915584	Mgl_12	0.272727	Microglia	Microglia_511
577	658	Vascular	1	VendC_15	0.527356	Vascular cells	Vasc_577
584	512	Vascular	0.992188	Per_22	0.410156	Vascular cells	Vasc_584
582	223	Fibroblast	0.991031	Fbl_31	0.313901	Fibroblasts	Fibro_582
579	372	Fibroblast	1	Fbl_28	0.564516	Fibroblasts	Fibro_579
583	567	Fibroblast	0.700176	Fbl_28	0.35097	Fibroblasts	Fibro_583
547	843	Oligodendrocyte	0.907473	Oligo_49	0.780546	Oligodendrocytes	Oligo_547
544	466	Oligodendrocyte	1	Oligo_49	0.851931	Oligodendrocytes	Oligo_544
546	250	Oligodendrocyte	0.992	Oligo_49	0.992	Oligodendrocytes	Oligo_546
550	271	Oligodendrocyte	1	Oligo_50	0.841328	Oligodendrocytes	Oligo_550
531	4250	Oligodendrocyte	0.992471	Oligo_49	0.387294	Oligodendrocytes	Oligo_531
542	9687	Oligodendrocyte	0.999897	Oligo_49	0.481883	Oligodendrocytes	Oligo_542
533	1838	Oligodendrocyte	0.988575	Oligo_47	0.604461	Oligodendrocytes	Oligo_533
521	9879	Oligodendrocyte	0.980767	Oligo_47	0.41735	Oligodendrocytes	Oligo_521
529	27639	Oligodendrocyte	0.999168	Oligo_45	0.309165	Oligodendrocytes	Oligo_529
563	299	Oligodendrocyte precursor	0.812709	OPC_36	0.638796	Oligodendrocyte precursor cells	OPC_563
552	236	Committed oligodendrocyte precursor	0.894068	COP_37	0.461864	Oligodendrocyte precursor cells	OPC_552
556	12162	Oligodendrocyte precursor	0.999918	OPC_33	0.444253	Oligodendrocyte precursor cells	OPC_556
629	236	Choroid plexus	1	Chrp_78	0.449153	Choroid plexus epithelial cells	ChorEpi_629
631	628	Choroid plexus	0.982484	Chrp_78	0.318471	Choroid plexus epithelial cells	ChorEpi_631
633	441	Ependymal	0.997732	Epen_72	0.258503	Ependymal cells	Epen_633
634	211	Ependymal	1	Epen_69	0.331754	Ependymal cells	Epen_634
586	991	Bergmann glia	1	Bgl_51	1	Astrocytes	Ast_Bergmann glia_586	Mapped to other bergmann glia by SAMap.
664	264	Astrocyte	0.988636	Astro_61	0.469697	Astrocytes	Ast_664
615	699	Astrocyte	1	Astro_61	0.958512	Astrocytes	Ast_615
621	2824	Astrocyte	0.994688	Astro_62	0.437323	Astrocytes	Ast_621
661	431	Astrocyte	0.99768	Astro_62	0.62645	Astrocytes	Ast_661
609	2144	Astrocyte	0.972481	Astro_60	0.729944	Astrocytes	Ast_609
659	783	Astrocyte	1	Astro_60	0.791826	Astrocytes	Ast_659
606	1338	Astrocyte	0.999253	Astro_62	0.700299	Astrocytes	Ast_606
657	407	Astrocyte	1	Astro_62	0.668305	Astrocytes	Ast_657
627	254	Astrocyte	1	Astro_58	0.799213	Astrocytes	Ast_627
655	317	Astrocyte	1	Astro_58	0.709779	Astrocytes	Ast_655
656	328	Astrocyte	1	Astro_57	0.942073	Astrocytes	Ast_656
650	282	Astrocyte	1	Astro_55	0.921986	Astrocytes	Ast_650
654	505	Astrocyte	1	Astro_53	0.687129	Astrocytes	Ast_654
651	1630	Astrocyte	1	Astro_54	0.766871	Astrocytes	Ast_651
652	962	Astrocyte	0.99896	Astro_54	0.585239	Astrocytes	Ast_652
593	2998	Astrocyte	0.991995	Astro_52	0.442628	Astrocytes	Ast_593
636	1746	Astrocyte	1	Astro_52	0.853952	Astrocytes	Ast_636
