# Supplementary material for: Whole genome duplication drove cell type evolution in the vertebrate brain
Source: Research Square preprint supplement (doi:10.21203/rs.3.rs-6965966/v1), 2025-07-04
Supplement: Supplementary file 8 [file 92c994bc4a5833fc06dc4ad2.xlsx]

## Sheet: S8
Table S8. Species for constructing gene trees and exploring gene relationships using OrthoFinder.
Species	Species	Reference	Assembly ID	Link	Note
Branchiostoma floridae	Florida lancelet	Huang, et al, 2023	NA	https://datadryad.org/stash/dataset/doi:10.5061/dryad.9p8cz8wkx
Branchiostoma belcheri	Belcher's lancelet	Huang, et al, 2023	NA	https://datadryad.org/stash/dataset/doi:10.5061/dryad.9p8cz8wkx
Branchiostoma japonicum	Japanese lancelet	Huang, et al, 2023	NA	https://datadryad.org/stash/dataset/doi:10.5061/dryad.9p8cz8wkx
Styela clava	Club tunicate	Wei, et al, 2020	GCF_013122585.1	https://ftp.ncbi.nlm.nih.gov/genomes/all/GCF/013/122/585/GCF_013122585.1_ASM1312258v2/
Ciona savignyi	Solitary sea squirt	Ensembl version	CSAV 2.0	ftp://ftp.ensembl.org/pub/release-110/fasta/ciona_savignyi/
Ciona intestinalis	Vase tunicate	Satou, et al, 2008	GCF_000224145.3	https://ftp.ncbi.nlm.nih.gov/genomes/all/GCF/000/224/145/GCF_000224145.3_KH/
Myxine glutinosa	Atlantic hagfish	NCBI	GCF_040869285.1	https://ftp.ncbi.nlm.nih.gov/genomes/all/GCF/040/869/285/GCF_040869285.1_UKY_Mglu_1.0/
Eptatretus atami	Brown hagfish	Marlétaz, et al, 2024	NA	https://zenodo.org/records/10227719
Eptatretus burgeri	Inshore hagfish	Ensembl version	Eburgeri_3.2	ftp://ftp.ensembl.org/pub/release-110/fasta/eptatretus_burgeri/
Lethenteron reissneri	Far eastern brook lamprey	Zhu, et al, 2020	GCF_015708825.1	https://ftp.ncbi.nlm.nih.gov/genomes/all/GCF/015/708/825/GCF_015708825.1_ASM1570882v1/	Annotation files were retrieved from lamprey brain sc paper (Lamanna, et al, 2023)
Petromyzon marinus	Sea lamprey	Lamanna, et, al, 2023; Smith, et al, 2018	GCA_002833325.1	https://ftp.ncbi.nlm.nih.gov/genomes/all/GCA/002/833/325/GCA_002833325.1_Pmar_germline_1.0/GCA_002833325.1_Pmar_germline_1.0_genomic.fna.gz
Lepisosteus oculatus	Spotted gar	Ensembl version	LepOcu1	ftp://ftp.ensembl.org/pub/release-110/fasta/lepisosteus_oculatus/
Danio rerio	Zebrafish	Ensembl version	GRCz11	ftp://ftp.ensembl.org/pub/release-110/fasta/danio_rerio/
Gasterosteus aculeatus	Stickleback	Ensembl version	BROAD S1	ftp://ftp.ensembl.org/pub/release-110/fasta/gasterosteus_aculeatus/
Xenopus tropicalis	Tropical clawedfrog	Ensembl version	UCB_Xtro_10.0	ftp://ftp.ensembl.org/pub/release-110/fasta/xenopus_tropicalis/
Pogona vitticeps	Bearded dragon	NCBI	GCF_900067755.1	https://ftp.ncbi.nlm.nih.gov/genomes/all/GCF/900/067/755/GCF_900067755.1_pvi1.1/
Anolis carolinensis	Green anole	Ensembl version	AnoCar2.0v2	ftp://ftp.ensembl.org/pub/release-110/fasta/anolis_carolinensis
Taeniopygia guttata	Zebra Finch	Ensembl version	bTaeGut1_v1.p	ftp://ftp.ensembl.org/pub/release-110/fasta/taeniopygia_guttata/
Gallus gallus	Chicken	Ensembl version	bGalGal1.mat.broiler.GRCg7b	ftp://ftp.ensembl.org/pub/release-110/fasta/gallus_gallus
Mus musculus	Mouse	Ensembl version	GRCm39	ftp://ftp.ensembl.org/pub/release-110/fasta/mus_musculus/
Homo sapiens	Human	Ensembl version	GRCh38.p14	ftp://ftp.ensembl.org/pub/release-110/fasta/homo_sapiens/
