# Supplementary material for: Whole genome duplication drove cell type evolution in the vertebrate brain
Source: Research Square preprint supplement (doi:10.21203/rs.3.rs-6965966/v1), 2025-07-04
Supplement: Supplementary file 9 [file c0535ec525da4d16d7f02d27.xlsx]

## Sheet: S3-1 Conserved TF orthogroup
Table S3-1. Identified vertebrate conserved TF orthogroups. For more information of orthogroups and related genes, please check uploaded files in github (https://github.com/DiracZhu1998/WGD2celltype_evolution/tree/main/2.gene_relationships/OrthoFinder).
Cell type family	Orthogroup ID	Number of species with top cell-type-specific TFs in this orthogroup
Astrocytes	OG0000314	4
Astrocytes	OG0000815	4
Astrocytes	OG0000843	4
Astrocytes	OG0001046	4
Astrocytes	OG0001189	3
Astrocytes	OG0001989	3
Astrocytes	OG0007018	3
Choroid plexus epithelial cells	OG0000637	3
Choroid plexus epithelial cells	OG0000776	4
Choroid plexus epithelial cells	OG0001189	4
Choroid plexus epithelial cells	OG0001504	4
Choroid plexus epithelial cells	OG0001679	4
Choroid plexus epithelial cells	OG0001752	3
Choroid plexus epithelial cells	OG0003901	3
Diencephalon GABAergic neurons	OG0000204	4
Diencephalon GABAergic neurons	OG0001296	3
Diencephalon GABAergic neurons	OG0001756	4
Diencephalon GABAergic neurons	OG0001765	4
Diencephalon GABAergic neurons	OG0001987	3
Diencephalon GABAergic neurons	OG0002183	4
Diencephalon GABAergic neurons	OG0002306	3
Diencephalon glutamatergic neurons	OG0000286	3
Diencephalon glutamatergic neurons	OG0000631	3
Diencephalon glutamatergic neurons	OG0001140	3
Diencephalon glutamatergic neurons	OG0001224	3
Diencephalon glutamatergic neurons	OG0001985	3
Diencephalon glutamatergic neurons	OG0002466	4
Diencephalon glutamatergic neurons	OG0002871	4
Ependymal cells	OG0000843	3
Ependymal cells	OG0001679	3
Ependymal cells	OG0001752	3
Ependymal cells	OG0003901	4
Mesencephalon GABAergic neurons	OG0000314	4
Mesencephalon GABAergic neurons	OG0000384	3
Mesencephalon GABAergic neurons	OG0000499	4
Mesencephalon GABAergic neurons	OG0000772	4
Mesencephalon GABAergic neurons	OG0000776	4
Mesencephalon GABAergic neurons	OG0000849	3
Mesencephalon GABAergic neurons	OG0001968	4
Mesencephalon GABAergic neurons	OG0002183	4
Mesencephalon GABAergic neurons	OG0002186	3
Mesencephalon GABAergic neurons	OG0004200	4
Mesencephalon glutamatergic neurons	OG0000384	4
Mesencephalon glutamatergic neurons	OG0000631	3
Mesencephalon glutamatergic neurons	OG0000842	4
Mesencephalon glutamatergic neurons	OG0001224	4
Mesencephalon glutamatergic neurons	OG0001365	3
Mesencephalon glutamatergic neurons	OG0001985	4
Mesencephalon glutamatergic neurons	OG0002338	3
Mesencephalon glutamatergic neurons	OG0002871	4
Mesencephalon glutamatergic neurons	OG0003163	3
Microglia	OG0000203	4
Microglia	OG0000349	4
Microglia	OG0000701	3
Microglia	OG0000713	3
Microglia	OG0000958	3
Microglia	OG0001092	3
Microglia	OG0001209	3
Microglia	OG0001230	4
Microglia	OG0001951	3
Oligodendrocyte precursor cells	OG0000843	3
Oligodendrocyte precursor cells	OG0000883	3
Oligodendrocyte precursor cells	OG0001046	3
Oligodendrocyte precursor cells	OG0001602	3
Oligodendrocyte precursor cells	OG0001989	3
Oligodendrocytes	OG0000608	3
Oligodendrocytes	OG0000637	3
Oligodendrocytes	OG0000843	3
Oligodendrocytes	OG0001140	3
Oligodendrocytes	OG0001658	3
Oligodendrocytes	OG0001688	3
Oligodendrocytes	OG0001989	3
Oligodendrocytes	OG0005639	3
Rhombencephalon GABAergic neurons	OG0000384	4
Rhombencephalon GABAergic neurons	OG0000587	3
Rhombencephalon GABAergic neurons	OG0000772	3
Rhombencephalon GABAergic neurons	OG0000812	4
Rhombencephalon GABAergic neurons	OG0000854	4
Rhombencephalon GABAergic neurons	OG0001098	3
Rhombencephalon GABAergic neurons	OG0001160	3
Rhombencephalon GABAergic neurons	OG0001354	3
Rhombencephalon GABAergic neurons	OG0002183	4
Rhombencephalon GABAergic neurons	OG0002824	3
Rhombencephalon GABAergic neurons	OG0003207	3
Rhombencephalon GABAergic neurons	OG0003558	4
Rhombencephalon glutamatergic neurons	OG0000812	3
Rhombencephalon glutamatergic neurons	OG0001855	3
Rhombencephalon glutamatergic neurons	OG0002183	3
Rhombencephalon glutamatergic neurons	OG0002338	3
Rhombencephalon glutamatergic neurons	OG0004200	3
Telencephalon GABAergic neurons	OG0000204	4
Telencephalon GABAergic neurons	OG0000709	4
Telencephalon GABAergic neurons	OG0000713	3
Telencephalon GABAergic neurons	OG0001296	3
Telencephalon GABAergic neurons	OG0001765	4
Telencephalon GABAergic neurons	OG0002306	3
Telencephalon GABAergic neurons	OG0002426	4
Telencephalon GABAergic neurons	OG0003991	4
Telencephalon GABAergic neurons	OG0004167	3
Telencephalon glutamatergic neurons	OG0000499	3
Telencephalon glutamatergic neurons	OG0000535	3
Telencephalon glutamatergic neurons	OG0000634	3
Telencephalon glutamatergic neurons	OG0000812	4
Telencephalon glutamatergic neurons	OG0001276	4
Telencephalon glutamatergic neurons	OG0001916	4
Telencephalon glutamatergic neurons	OG0002426	4
Telencephalon glutamatergic neurons	OG0002646	3
Telencephalon glutamatergic neurons	OG0002848	3
Telencephalon glutamatergic neurons	OG0003558	3
Vascular cells	OG0000026	3
Vascular cells	OG0000631	3
Vascular cells	OG0000815	4
Vascular cells	OG0000842	3
Vascular cells	OG0001168	3
Vascular cells	OG0001189	4
Vascular cells	OG0001209	3
Vascular cells	OG0001344	4
Vascular cells	OG0001422	4
Vascular cells	OG0001499	4
Vascular cells	OG0001648	3
Vascular cells	OG0001668	4
Vascular cells	OG0002109	3

## Sheet: S3-2 Conserved TF programme
Table S3-2. Identified vertebrate conserved TF programme and references.
species	Symbol	Cell type	Gene type	Lamprey Gene ID	Notes	Citation	PMID	Title
Amniote conserved	OLIG2	Astrocytes	TF	PMZ_0031563/PMZ_0032541	Although Oligo3 belongs to this family but it is not a marker for astrocytes of vertebrates.	Marshall, et al, 2005	16093378	Olig2 directs astrocyte and oligodendrocyte formation in postnatal subventricular zone cells
Amniote conserved	RFX4	Astrocytes	TF	MSTRG.19113	Lamprey has RFX4 (confirmed by tree and blast to nr database) but RFX4 is not expressed in Astrocytes of lamprey.	Cahoy, et al, 2008	18171944	A transcriptome database for astrocytes, neurons, and oligodendrocytes: a new resource for understanding brain development and function
Vertebrate conserved	SOX9	Astrocytes	TF	MSTRG.6852/MSTRG.4669/MSTRG.1257	MSTRG.1257 is highly expressed in astrocytes compared to other copies in this family.	Samanta, et al, 2004	15280210	Interactions between ID and OLIG proteins mediate the inhibitory effects of BMP4 on oligodendroglial differentiation
Vertebrate conserved	LMX1A	Choroid plexus epithelial cells	TF	MSTRG.7966	Lmx1a/b are not highly expressed in mouse Choroid plexus epithelial cells.	Chizhikov, et al, 2010	20498066	Lmx1a regulates fates and location of cells originating from the cerebellar rhombic lip and telencephalic cortical hem
Vertebrate conserved	MSX1	Choroid plexus epithelial cells	TF	MSTRG.5614	Only one lamprey copy is present in this family.	Liddelow, et al, 2015	25784848	Development of the choroid plexus and blood-CSF barrier
Vertebrate conserved	OTX2	Choroid plexus epithelial cells	TF	MSTRG.8275	Only one lamprey copy is present in this family.	Johansson, et al, 2013	23364326	The transcription factor Otx2 regulates choroid plexus development and function
Vertebrate conserved	DLX1, DLX2, DLX5, and DLX6	Diencephalon GABAergic neurons	TF	MSTRG.6108/MSTRG.6109/MSTRG.2263		Martínez-de-la-Torre, et al, 2011	21185911	Distal-less-like protein distribution in the larval lamprey forebrain
Vertebrate conserved	ISL1	Diencephalon GABAergic neurons	TF	MSTRG.9785/MSTRG.17235	Although two copies are expressed in lamprey DeInh, MSTRG.9785 shows higher expression.	Yao, et al, 2023	38092916	A high-resolution transcriptomic and spatial atlas of cell types in the whole mouse brain
Vertebrate conserved	LHX1	Diencephalon GABAergic neurons	TF	MSTRG.2966/MSTRG.11466	LHX5 is also in this family but is not expressed in this cell type.	Moreno, et al, 2004	15024752	LIM-homeodomain genes as developmental and adult genetic markers of Xenopus forebrain functional subdivisions
Vertebrate conserved	NKX2.1	Diencephalon GABAergic neurons	TF	MSTRG.8326		Jager, et al, 2021	33522480	Dual midbrain and forebrain origins of thalamic inhibitory interneurons
Vertebrate conserved	GBX2	Diencephalon glutamatergic neurons	TF	MSTRG.2120	Lamprey doesn't use GBX2 (MSTRG.2120 ) but GBX1 (MSTRG.1814) and unknown copy (MSTRG.10663) from this family.	Nagalski, et al, 2016	25963709	Molecular anatomy of the thalamic complex and the underlying transcription factors. Nagalski et al., 2015
Vertebrate conserved	LEF1	Diencephalon glutamatergic neurons	TF	MSTRG.4866/MSTRG.18671	Only two lamprey copies are present in this family and both are highly expressed in DeExc.	Nagalski, et al, 2016	25963709	Molecular anatomy of the thalamic complex and the underlying transcription factors. Nagalski et al., 2015
Vertebrate conserved	LHX2 and LHX9	Diencephalon glutamatergic neurons	TF	LHX2/9 (MSTRG.10469)		Peukert, et al, 2011	22180728	Lhx2 and Lhx9 Determine Neuronal Differentiation and Compartition in the Caudal Forebrain by Regulating Wnt Signaling
Vertebrate conserved	PROX1	Diencephalon glutamatergic neurons	TF	MSTRG.17410/MSTRG.20120	Two lamprey copies clustered with Prox1 and both expressed; MSTRG.8253 is actually Prox2 but mistakenly labelled as Prox1 in lamprey sc paper; also expressed in TeExc/TeInh/DeInh, not very specific.
Vertebrate conserved	SHOX2	Diencephalon glutamatergic neurons	TF	MSTRG.322		Yu, et al, 2021	33675359	The Transcription Factor Shox2 Shapes Neuron Firing Properties and Suppresses Seizures by Regulation of Key Ion Channels in Thalamocortical Neurons
Vertebrate conserved	TCF7L2	Diencephalon glutamatergic neurons	TF	MSTRG.4866/MSTRG.18671	Only two lamprey copies are present in this family and both are highly expressed in DeExc.	Nagalski, et al, 2016	25963709	Molecular anatomy of the thalamic complex and the underlying transcription factors. Nagalski et al., 2015
Vertebrate conserved	FOXJ1	Ependymal cells	TF	MSTRG.6745/MSTRG.7459	Only MSTRG.6745 in lamprey are expressed in ependymal cells.	Ripoll, et al, 2023	37329342	Persistence of FoxJ1+ Pax6+ Sox2+ ependymal cells throughout life in the human spinal cord
Vertebrate conserved	MSX1	Ependymal cells	TF	MSTRG.5614	Only one lamprey copy is present in this family	Ripoll, et al, 2023	37329342	Persistence of FoxJ1+ Pax6+ Sox2+ ependymal cells throughout life in the human spinal cord
Vertebrate conserved	SOX9	Ependymal cells	TF	MSTRG.6852/MSTRG.4669/MSTRG.1257	Lamprey MSTRG.6852 is the only one expressed in Ependyaml cells.	Sun, et al, 2017	28336567	SOX9 Is an Astrocyte-Specific Nuclear Marker in the Adult Brain Outside the Neurogenic Regions
Vertebrate conserved	SIX3	GABAergic neurons	TF	MSTRG.9404/MSTRG.3757	Both lamprey copiesare highly expressed in GABAergic neurons.	Achim, et al, 2013	24196748	Mechanisms regulating GABAergic neuron development
Vertebrate conserved	GATA2 and GATA3	Mesencephalon GABAergic neurons	TF	MSTRG.13735/MSTRG.8761		Kala, et al, 2009	19088086	Gata2 is a tissue-specific post-mitotic selector gene for midbrain GABAergic neurons. The role of Tal2 and Tal1 in the differentiation of midbrain GABAergic neuron precursors
Vertebrate conserved	LHX1 and LHX5	Mesencephalon GABAergic neurons	TF	MSTRG.2966/MSTRG.11466		Waite, et al, 2013	21925604	Distinct populations of GABAergic neurons in mouse rhombomere 1 express but do not require the homeodomain transcription factor PITX2
Vertebrate conserved	OTX2	Mesencephalon GABAergic neurons	TF	MSTRG.8275		Kala, et al, 2009	19088086	Gata2 is a tissue-specific post-mitotic selector gene for midbrain GABAergic neurons. The role of Tal2 and Tal1 in the differentiation of midbrain GABAergic neuron precursors
Vertebrate conserved	PAX7	Mesencephalon GABAergic neurons	TF	MSTRG.18473/MSTRG.13524	Human splatter (cell type) has some expression	Düdükcü, et al, 2024	39569362	Molecular diversity and migration of GABAergic neurons in the developing ventral midbrain
Vertebrate conserved	TAL1	Mesencephalon GABAergic neurons	TF	MSTRG.7811		Achim, et al, 2013	24167708	The role of Tal2 and Tal1 in the differentiation of midbrain GABAergic neuron precursors
Vertebrate conserved	UNCX	Mesencephalon GABAergic neurons	TF	MSTRG.1431/MSTRG.11167	Also highly expressed in Rhombencephalon glut neurons.	Rabe, et al, 2024	23217170	The transcription factor Uncx4.1 acts in a short window of midbrain dopaminergic neuron differentiation
Vertebrate conserved	LHX2 and LHX9	Mesencephalon glutamatergic neurons	TF	LHX2/9 (MSTRG.10469)		Rétaux, et al, 1999	9880598	Lhx9: a novel LIM-homeodomain gene expressed in the developing forebrain
Vertebrate conserved	POU4F1 and POU4F2	Mesencephalon glutamatergic neurons	TF	MSTRG.8547	Human only express POU4F1 as marker of Mesencephalon glutamatergic neurons	Kala, et al, 2009	19088086	Gata2 is a tissue-specific post-mitotic selector gene for midbrain GABAergic neurons. The role of Tal2 and Tal1 in the differentiation of midbrain GABAergic neuron precursors
Vertebrate conserved	SHOX2	Mesencephalon glutamatergic neurons	TF	MSTRG.322		Abassah-Oppong, et al, 2024	39389973	A gene desert required for regulatory control of pleiotropic Shox2 expression and embryonic survival
Vertebrate conserved	TCF7L2	Mesencephalon glutamatergic neurons	TF	MSTRG.4866/MSTRG.18671	Not very specific.	Gui, et al, 2021	34503558	Single-nuclei chromatin profiling of ventral midbrain reveals cell identity transcription factors and cell-type-specific gene regulatory variation
Vertebrate conserved	Tfap2a and Tfap2b	Mesencephalon glutamatergic neurons	TF	MSTRG.591/MSTRG.6430
Vertebrate conserved	IKZF1	Microglia	TF	MSTRG.10752/MSTRG.1844/MSTRG.2004	Three copies in lamprey and expressed in microglia but not considered as top markers by random forest.	Ballasch, et al, 2023	36702234	Ikzf1 as a novel regulator of microglial homeostasis in inflammation and neurodegeneration
Vertebrate conserved	IRF8	Microglia	TF	MSTRG.15347	MSTRG.15347 is the only copy in this family considered as microglia TF marker by random forest.	Saeki, et al, 2024	39313544	IRF8 defines the epigenetic landscape in postnatal microglia, thereby directing their transcriptome programs
Amniote conserved	MAF	Microglia	TF	MSTRG.7095/MSTRG.17852/MSTRG.13013	Three copies in lamprey but none of them are expressed in microglia.	Bräuer, et al, 2004	15063720	Identification of macrophage/microglia activation factor (MAF) associated with late endosomes/lysosomes in microglial cells
Vertebrate conserved	RUNX1	Microglia	TF	MSTRG.15297	Only MSTRG.15297 is considered as TF marker for microglia by random forest.	Zusso, et al, 2012	22895712	Regulation of postnatal forebrain amoeboid microglial cell proliferation and development by the transcription factor Runx1
Vertebrate conserved	SPI1	Microglia	TF	MSTRG.9942/MSTRG.18245	Two copies in this family and both of them are expressed in microglia.	Kierdorf, et al, 2013	23334579	Microglia emerge from erythromyeloid precursors via Pu.1- and Irf8-dependent pathways
Amniote conserved	ASCL1	Oligodendrocyte precursor cells	TF	NA		Mitew, et al, 2013	24275321	Mechanisms regulating the development of oligodendrocytes and central nervous system myelin
Amniote conserved	ETV1 and ETV5	Oligodendrocyte precursor cells	TF	MSTRG.6105/MSTRG.24021/MSTRG.2258/MSTRG.1648	Four copies in lamprey, three of them expressed in astrocytes. ETV4 in this family but not marker for OPC.	Elbaz, et al, 2020	30770136	Molecular Control of Oligodendrocyte Development
Amniote conserved	NKX2.2	Oligodendrocyte precursor cells	TF	MSTRG.8327/MSTRG.3884		Cai, et al, 2010	19780200	Co-localization of Nkx6.2 and Nkx2.2 Homeodomain Proteins in Differentiated Myelinating Oligodendrocytes
Amniote conserved	Olig2	Oligodendrocyte precursor cells	TF	NA	Oligo3 in this family but not marker.	Zhou, et al, 2001	11567617	The bHLH transcription factor Olig2 promotes oligodendrocyte differentiation in collaboration with Nkx2.2
Amniote conserved	SOX5 and SOX6	Oligodendrocyte precursor cells	TF	MSTRG.14950	several copies in lamprey, only this one and MSTRG.18270 have some expression, especially in AST and Ependymal cells.	Broti, et al, 2016	26345464	Transcription factors Sox5 and Sox6 exert direct and indirect influences on oligodendroglial migration in spinal cord and forebrain
Amniote conserved	SOX8 and SOX10	Oligodendrocyte precursor cells	TF	MSTRG.1257/MSTRG.4669/MSTRG.6852	Three copies in lamprey expressed in astrcoytes. With considering AST and Oligodendrocytes share developmental path, it suggest the origin of oligodendrocytes from astrocytes.	Stolt, et al, 2004	15102707	Transcription factors Sox8 and Sox10 perform non-equivalent roles during oligodendrocyte development despite functional redundancy
Amniote conserved	CEB5 and ATF2	Oligodendrocytes	TF	MSTRG.9125/MSTRG.7523/MSTRG.19218/MSTRG.11870	Three of the lamprey copies expressed in astrocytes	Shiga, et al, 2005; Seiwa, et al, 2002	16198437;12125072	Advancement of differentiation of oligodendrocyte progenitor cells by a cascade including protein kinase A and cyclic AMP-response element binding protein; CNS myelinogenesis in vitro: myelin basic protein deficient shiverer oligodendrocytes
Amniote conserved	NKX2.2	Oligodendrocytes	TF	MSTRG.8327/MSTRG.3884		Cai, et al, 2010	19780200	Co-localization of Nkx6.2 and Nkx2.2 Homeodomain Proteins in Differentiated Myelinating Oligodendrocytes
Amniote conserved	NKX6.2	Oligodendrocytes	TF	MSTRG.5664/MSTRG.6485	Lamprey MSTRG.5664/MSTRG.6485 in NKX6-1/2/3 family; MSTRG.5664 expressed in astrocytes.	Cai, et al, 2010	19780200	Co-localization of Nkx6.2 and Nkx2.2 Homeodomain Proteins in Differentiated Myelinating Oligodendrocytes
Amniote conserved	OLIG2	Oligodendrocytes	TF	NA	Oligo3 is present in this family but is not a marker.	Zhou, et al, 2001	11567617	The bHLH transcription factor Olig2 promotes oligodendrocyte differentiation in collaboration with Nkx2.2
Amniote conserved	PROX1	Oligodendrocytes	TF	MSTRG.17410/MSTRG.20120	Lamprey express MSTRG.20120 in astrocytes and ependyaml cells.	Bunk, et al, 2016	27068685	Prox1 Is Required for Oligodendrocyte Cell Identity in Adult Neural Stem Cells of the Subventricular Zone
Amniote conserved	SOX8 and SOX10	Oligodendrocytes	TF	MSTRG.1257/MSTRG.4669/MSTRG.6852	Three copies in lamprey expressed in astrcoytes. With considering AST and Oligodendrocytes share developmental path, it suggest the origin of oligodendrocytes from astrocytes.	Stolt, et al, 2004	15102707	Transcription factors Sox8 and Sox10 perform non-equivalent roles during oligodendrocyte development despite functional redundancy
Vertebrate conserved	BHLHE22	Rhombencephalon GABAergic neurons	TF	MSTRG.15116	One addition Bhlhe23 in this family but is not expressed in Rhombencephalon.	Ramirez, et al, 2022	35942939	Temporal analysis of enhancers during mouse cerebellar development reveals dynamic and novel regulatory functions
Vertebrate conserved	GATA2 and GATA3	Rhombencephalon GABAergic neurons	TF	MSTRG.13735/MSTRG.8761		Kala, et al, 2009	19088086	Gata2 is a tissue-specific post-mitotic selector gene for midbrain GABAergic neurons. The role of Tal2 and Tal1 in the differentiation of midbrain GABAergic neuron precursors
Vertebrate conserved	LBX1	Rhombencephalon GABAergic neurons	TF	MSTRG.5754	One addition LBX2 in this family but is not expressed in Rhombencephalon.	Schinzel, et al, 2021	33786818	The Lbx1 lineage differentially contributes to inhibitory cell types of the dorsal cochlear nucleus, a cerebellum-like structure, and the cerebellum
Vertebrate conserved	LHX1 and LHX5	Rhombencephalon GABAergic neurons	TF	MSTRG.2966/MSTRG.11466	Some are not considered as top markers by random forest, but all of them are expressed in Rhombencephalon GABAergic neurons.	Zhao, et al, 2007	17664423	LIM-homeodomain proteins Lhx1 and Lhx5, and their cofactor Ldb1, control Purkinje cell differentiation in the developing cerebellum
Vertebrate conserved	NEUROD1/2/4/6	Rhombencephalon GABAergic neurons	TF	MSTRG.5979/MSTRG.1633	Alse expressed in ReExc.	Tutukova, et al, 2021	34177462	The Role of Neurod Genes in Brain Development, Function, and Disease
Vertebrate conserved	TFAP2A and TFAP2B	Rhombencephalon GABAergic neurons	TF	MSTRG.591/MSTRG.6430	Lamprey MSTRG.591 is expressed in Rhombencephalon GABAergic neurons	Zainolabidin, et al, 2017	28912684	Distinct Activities of Tfap2A and Tfap2B in the Specification of GABAergic Interneurons in the Developing Cerebellum
Amniote conserved	BARHL1 and BARHL2	Rhombencephalon glutamatergic neurons	TF	NA		Li, et al, 2004	15044550	Barhl1 regulates migration and survival of cerebellar granule cells by controlling expression of the neurotrophin-3 gene
Amniote conserved	NEUROD1/2/4/6	Rhombencephalon glutamatergic neurons	TF	MSTRG.5979/MSTRG.1633	Alse express in ReInh.	Tutukova, et al, 2021	34177462	The Role of Neurod Genes in Brain Development, Function, and Disease
Amniote conserved	PAX6	Rhombencephalon glutamatergic neurons	TF	MSTRG.767/MSTRG.5511		Divya, et al, 2016	27452274	Regulation of Tlx3 by Pax6 is required for the restricted expression of Chrnα3 in Cerebellar Granule Neuron progenitors during development
Amniote conserved	EN2	Rhombencephalon neurons	TF	MSTRG.9098	Only this copy is present in lamprey and expressed in dataset. In lamprey, it expressed at potential ReInh of lamprey but mostly expressed in Mesencephalon unlike jawed vertebrates.	Wilson, et al, 2011	21431469	Spatially Restricted and Developmentally Dynamic Expression of Engrailed Genes in Multiple Cerebellar Cell Types
Amniote conserved	ARX	Telencephalon GABAergic neurons	TF	NA		Colasante, et al, 2009	19627984	Arx acts as a regional key selector gene in the ventral telencephalon mainly through its transcriptional repression activity
Vertebrate conserved	Dlx1, Dlx2, Dlx5, and Dlx6	Telencephalon GABAergic neurons	TF	MSTRG.6108/MSTRG.6109/MSTRG.2263		Martínez-de-la-Torre, et al, 2011	21185911	Distal-less-like protein distribution in the larval lamprey forebrain
Vertebrate conserved	FOXG1	Telencephalon GABAergic neurons	TF	MSTRG.10939		Miyoshi, et al, 2024	38588430	Developmental trajectories of GABAergic cortical interneurons are sequentially modulated by dynamic FoxG1 expression levels
Vertebrate conserved	LHX6 and LHX8	Telencephalon GABAergic neurons	TF	MSTRG.10404/MSTRG.23466	Only MSTRG.10404 is expressed in TeInh in lamprey.	Zhou, et al, 2015	26148970	Lhx6 and Lhx8: cell fate regulators and beyond
Vertebrate conserved	SP9	Telencephalon GABAergic neurons	TF	MSTRG.17344	belong to SP6/7/8/9 family.	Zhang, et al, 2017	27452460	The Zinc Finger Transcription Factor Sp9 Is Required for the Development of Striatopallidal Projection Neurons
Amniote conserved	EMX1 and EMX2	Telencephalon glutamatergic neurons	TF	MSTRG.6588/MSTRG.5740		Bishop, et al, 2003	12561075	Emx1 and Emx2 cooperate to regulate cortical size, lamination, neuronal differentiation, development of cortical efferents, and thalamocortical pathfinding
Vertebrate conserved	NEUROD1/2/4/6	Telencephalon glutamatergic neurons	TF	MSTRG.5979/MSTRG.1633		Tutukova, et al, 2021	34177462	The Role of Neurod Genes in Brain Development, Function, and Disease
Vertebrate conserved	TBR1	Telencephalon glutamatergic neurons	TF	MSTRG.6042/MSTRG.9154	Two lamprey copies are expressed in TeExc.	Villar-Cerviño, et al, 2011	21452205	Glutamatergic neuronal populations in the forebrain of the sea lamprey, Petromyzon marinus: an in situ hybridization and immunocytochemical study.
Vertebrate conserved	BCL11B	Telencephalon neurons	TF	MSTRG.3946		Lennon, et al, 2017	28424591	Bcl11b-A Critical Neurodevelopmental Transcription Factor-Roles in Health and Disease
Vertebrate conserved	SATB1	Telencephalon neurons	TF	MSTRG.19067/MSTRG.9173		Huang, et al, 2011	21658419	Distribution of Satb1 in the central nervous system of adult mice
Vertebrate conserved	ETS1 and ETS2	Vascular cells	TF	MSTRG.9655/MSTRG.1495
Vertebrate conserved	KLF2 and KLF4	Vascular cells	TF	MSTRG.7796/MSTRG.12446		Novodvorsky, 2014	24751430	The role of the transcription factor KLF2 in vascular development and disease
Vertebrate conserved	SOX7, SOX17, SOX18	Vascular cells	TF	MSTRG.1185/MSTRG.4435		Yao, et al, 2019	30984768	SOX Transcription Factors in Endothelial Differentiation and Endothelial-Mesenchymal Transitions
Vertebrate conserved	TBX2 and TBX3	Vascular cells	TF	MSTRG.3117/MSTRG.3089		Singh, et al, 2011	22130515	Tbx2 and Tbx3 induce atrioventricular myocardial development and endocardial cushion formation
