# Supplementary material for: Whole genome duplication drove cell type evolution in the vertebrate brain
Source: Research Square preprint supplement (doi:10.21203/rs.3.rs-6965966/v1), 2025-07-04
Supplement: Supplementary file 10 [file d209f089834619e5046d183c.xlsx]

## Sheet: Additional information
Table S9. Additional species and paralogue information for ohnologue detection by OHNOLOG v2.
Species	Common name	version
Homo sapiens	Human	104-110
Gorilla gorilla	Western Gorilla	#
Chlorocebus sabaeus	Green monkey	104-110
Mus musculus	Mouse	104-110
Felis catus	Domestic cat	104-110
Equus caballus	Horse	104-110
Pogona vitticeps	Bearded dragon	96-99
Taeniopygia guttata	zebra finch	104-110
Gallus gallus	Chicken	104-110
Meleagris gallopavo	Turkey	104-110
Drosophila melanogaster	Fruit fly	104-110
Ciona intestinalis	sea squirt	104-110
Ciona savignyi	sea squirt	104-110
Caenorhabditis elegans	worm	104-110
Used Ensembl version	Download website
Release 110	https://jul2023.archive.ensembl.org
Release 109	https://feb2023.archive.ensembl.org
Release 108	https://oct2022.archive.ensembl.org
Release 107	https://jul2022.archive.ensembl.org
Release 106	https://apr2022.archive.ensembl.org
Release 105	https://dec2021.archive.ensembl.org
Release 104	https://may2021.archive.ensembl.org
For Gorilla gorilla and some version, due to Ensembl 5mins limit, can only retrieved manually
Release 99	http://jan2020.archive.ensembl.org
